# Supplementary material
Source: publisher figshare collection journal article supplement (https://tandf.figshare.com/articles/dataset/_/15026803)
Supplement: Supplementary file 1 [file 1]

## Sheet: File 01
Variable response of arsenic contaminated groundwater microbial community to electron acceptor regime revealed by microcosm based high-throughput sequencing approach Anumeha Saha 1, Balaram Mohapatra 1, Sufia Khannam Kazy 2, and Pinaki Sar 1* 1 Department of Biotechnology, Indian Institute of Technology Kharagpur, Kharagpur, 721302 2 Department of Biotechnology, National Institute of Technology D…
SI. File 01 Distribution of different genera across the samples.
# Constructed from biom file
#OTU ID						GW	NT	MN	FE	AS	SUL	BIC	MIX	AS3
D_0__Bacteria	D_1__Proteobacteria	D_2__Alphaproteobacteria	D_3__Rhizobiales	D_4__Rhizobiaceae	D_5__Allorhizobium-Neorhizobium-Pararhizobium-Rhizobium	0.00350693	0.0315623	0	0.0210416	0.00350693	0	0.00701385	1.19586	49.3284
D_0__Bacteria	D_1__Proteobacteria	D_2__Gammaproteobacteria	D_3__Betaproteobacteriales	D_4__Burkholderiaceae	D_5__Cupriavidus	0	0	0	0	0	0	0	0	47.6626
D_0__Bacteria	D_1__Proteobacteria	D_2__Alphaproteobacteria	D_3__Rhizobiales	D_4__Rhizobiaceae	Other	0.0210416	0.0631247	0	0.00350693	0	0	0.0385762	0.112222	2.41978
D_0__Bacteria	D_1__Proteobacteria	D_2__Alphaproteobacteria	D_3__Sphingomonadales	D_4__Sphingomonadaceae	D_5__Sphingobium	0.168332	0	0	0	0	0	0.0140277	0	0.22795
D_0__Bacteria	D_1__Firmicutes	D_2__Clostridia	D_3__Clostridiales	D_4__Ruminococcaceae	D_5__Ruminiclostridium	0	0	0	58.0431	5.24987	0	0	0	0.126249
D_0__Bacteria	D_1__Proteobacteria	Other	Other	Other	Other	0.336665	0.00350693	0.0105208	0	0.00350693	0	0.0526039	0.22795	0.0911801
D_0__Bacteria	D_1__Proteobacteria	D_2__Alphaproteobacteria	Other	Other	Other	0.220936	0.0420831	0.0526039	0.0140277	0	0	1.76048	0.0841662	0.04559
D_0__Bacteria	D_1__Acidobacteria	D_2__Acidobacteriia	D_3__Solibacterales	D_4__Solibacteraceae (Subgroup 3)	Other	0.00350693	0.00350693	0	5.63563	0.617219	0	0	0	0.0245485
D_0__Bacteria	D_1__Acidobacteria	D_2__Acidobacteriia	D_3__Acidobacteriales	D_4__Acidobacteriaceae (Subgroup 1)	Other	0	0	0	3.14922	0.101701	0	0	0	0.0245485
D_0__Bacteria	D_1__Firmicutes	D_2__Bacilli	D_3__Bacillales	D_4__Paenibacillaceae	D_5__Paenibacillus	0	0	0	0	0	0	0	0	0.0210416
D_0__Bacteria	D_1__Acidobacteria	D_2__Acidobacteriia	D_3__Acidobacteriales	D_4__Acidobacteriaceae (Subgroup 1)	Ambiguous_taxa	0	0	0	10.1736	0.392776	0	0	0	0.00701385
D_0__Bacteria	D_1__Firmicutes	D_2__Clostridia	D_3__Clostridiales	D_4__Peptococcaceae	D_5__Thermincola	0	0	0	4.99036	0.199895	0	0	0	0.00701385
D_0__Bacteria	D_1__Proteobacteria	D_2__Gammaproteobacteria	D_3__Betaproteobacteriales	D_4__Rhodocyclaceae	D_5__Dechloromonas	0.648781	1.771	13.3894	0.305103	12.6705	0.0245485	0.189374	45.9162	0.00350693
D_0__Bacteria	D_1__Spirochaetes	D_2__Spirochaetia	D_3__Spirochaetales	D_4__Spirochaetaceae	D_5__uncultured	0.0105208	0	28.4938	0.266526	0.00350693	29.893	1.9218	4.0505	0.00350693
D_0__Bacteria	D_1__Acidobacteria	D_2__Acidobacteriia	D_3__Solibacterales	D_4__Solibacteraceae (Subgroup 3)	D_5__Candidatus Solibacter	0	0	0.0280554	0.49097	0.0385762	0	0	0	0.00350693
D_0__Bacteria	D_1__Bacteroidetes	D_2__Bacteroidia	D_3__Flavobacteriales	D_4__Weeksellaceae	D_5__Empedobacter	0	0	0	0.739961	0.00350693	0	0	0	0.00350693
D_0__Bacteria	D_1__Proteobacteria	D_2__Deltaproteobacteria	D_3__Desulfuromonadales	D_4__Geobacteraceae	D_5__Geobacter	0.0315623	0	0.350693	0	0	0	1.6728	19.2706	0
D_0__Bacteria	D_1__Proteobacteria	D_2__Gammaproteobacteria	D_3__Betaproteobacteriales	D_4__Rhodocyclaceae	Other	2.57058	6.47379	14.0873	0.403297	5.84955	0.0631247	0.119235	15.4831	0
D_0__Bacteria	D_1__Bacteroidetes	D_2__Ignavibacteria	D_3__Ignavibacteriales	D_4__SR-FBR-L83	Other	0.00701385	2.06207	0.0105208	0.192881	0.0315623	0	0	3.87165	0
D_0__Bacteria	D_1__Acidobacteria	D_2__Holophagae	D_3__Holophagales	D_4__Holophagaceae	Other	0.0175346	0.0280554	0.0911801	0	1.54305	0	0	2.8371	0
D_0__Bacteria	D_1__Bacteroidetes	D_2__Bacteroidia	D_3__Bacteroidales	D_4__Dysgonomonadaceae	D_5__Petrimonas	0	0.0420831	0.00350693	0.00701385	0	0.736454	0.0175346	1.71138	0
D_0__Bacteria	D_1__Acidobacteria	D_2__Holophagae	D_3__Subgroup 7	Other	Other	0.00701385	0.0105208	0.0841662	0	0.00350693	0	57.8678	1.19235	0
D_0__Bacteria	D_1__Proteobacteria	D_2__Deltaproteobacteria	D_3__Bdellovibrionales	D_4__Bdellovibrionaceae	D_5__OM27 clade	0	0	0	0	0	0	0	1.03805	0
D_0__Bacteria	D_1__Proteobacteria	D_2__Alphaproteobacteria	D_3__Caulobacterales	D_4__Caulobacteraceae	D_5__Brevundimonas	4.27845	0.0561108	0.0245485	0.315623	0.0350693	0	0	0.603191	0
D_0__Bacteria	D_1__Proteobacteria	D_2__Alphaproteobacteria	D_3__Dongiales	D_4__Dongiaceae	D_5__Dongia	0	0.049097	0	0.157812	0	0	0.424338	0.564615	0
D_0__Bacteria	D_1__Bacteroidetes	D_2__Ignavibacteria	D_3__Ignavibacteriales	D_4__PHOS-HE36	Other	0	0.757496	0	0.143784	0	0	0.0140277	0.420831	0
D_0__Bacteria	D_1__Deinococcus-Thermus	D_2__Deinococci	D_3__Deinococcales	D_4__Deinococcaceae	D_5__Deinococcus	8.94968	0.0631247	0	0	71.9832	0	0.00350693	0.252499	0
D_0__Bacteria	D_1__Bacteroidetes	D_2__Bacteroidia	D_3__Bacteroidales	D_4__Dysgonomonadaceae	D_5__Proteiniphilum	0	0	0	0	0	0.452393	0.0315623	0.213922	0
D_0__Bacteria	D_1__Proteobacteria	D_2__Gammaproteobacteria	D_3__Betaproteobacteriales	Other	Other	2.8336	0.757496	0.0350693	0.00701385	0.0701385	0	0.122742	0.210416	0
D_0__Bacteria	D_1__Bacteroidetes	D_2__Bacteroidia	D_3__Bacteroidales	D_4__Dysgonomonadaceae	Other	0	0.00701385	0	0	0	0	0	0.157812	0
D_0__Bacteria	D_1__Firmicutes	D_2__Erysipelotrichia	D_3__Erysipelotrichales	D_4__Erysipelotrichaceae	D_5__Erysipelothrix	0	0	0	0	0	0.00350693	0	0.126249	0
D_0__Bacteria	Other	Other	Other	Other	Other	3.35964	0.0701385	0.115729	0.140277	0.112222	0.140277	0.203402	0.119235	0
D_0__Bacteria	D_1__Firmicutes	Other	Other	Other	Other	0.00350693	0	0	0	0	0.0140277	0	0.0666316	0
D_0__Bacteria	D_1__Proteobacteria	D_2__Gammaproteobacteria	D_3__Betaproteobacteriales	D_4__Burkholderiaceae	Other	1.44836	0.911801	0	0.368227	0.0876732	0	0.140277	0.0350693	0
D_0__Bacteria	D_1__Proteobacteria	D_2__Gammaproteobacteria	D_3__Enterobacteriales	D_4__Enterobacteriaceae	Other	0.00701385	0.571629	0	0.0210416	0	0	0	0.0315623	0
D_0__Bacteria	D_1__Bacteroidetes	D_2__Ignavibacteria	D_3__Ignavibacteriales	D_4__SR-FBR-L83	Ambiguous_taxa	0	0.0140277	0	0	0	0	0	0.0280554	0
D_0__Bacteria	D_1__Proteobacteria	D_2__Alphaproteobacteria	D_3__Rhizobiales	D_4__Pleomorphomonadaceae	D_5__uncultured	0.241978	0	0.164826	0	0.0701385	0	0	0.0245485	0
D_0__Bacteria	D_1__Acidobacteria	D_2__Holophagae	D_3__Holophagales	D_4__Holophagaceae	Ambiguous_taxa	0	0	0.00701385	0	0.0175346	0	0	0.0210416	0
D_0__Bacteria	D_1__Proteobacteria	D_2__Deltaproteobacteria	Other	Other	Other	0.291075	0	0.0210416	0	0	0	0.04559	0.0175346	0
D_0__Bacteria	D_1__Proteobacteria	D_2__Gammaproteobacteria	D_3__Betaproteobacteriales	D_4__Rhodocyclaceae	D_5__Azospira	0.0420831	8.75329	0.0736454	2.16027	0.0245485	0	0.108715	0.0140277	0
D_0__Bacteria	D_1__Proteobacteria	D_2__Gammaproteobacteria	D_3__Betaproteobacteriales	D_4__Burkholderiaceae	D_5__Delftia	0.326144	0.0105208	0	0	0.0771524	0	0.0350693	0.0105208	0
D_0__Bacteria	D_1__Bacteroidetes	D_2__Ignavibacteria	D_3__Ignavibacteriales	Other	Other	0.0210416	0.0596177	0.452393	0	0	0	0.0140277	0.0105208	0
D_0__Bacteria	D_1__Proteobacteria	D_2__Gammaproteobacteria	Other	Other	Other	8.66912	0.185867	0.00701385	0	0.00350693	0	0.0105208	0.0105208	0
D_0__Bacteria	D_1__Bacteroidetes	D_2__Ignavibacteria	D_3__Ignavibacteriales	D_4__PHOS-HE36	D_5__uncultured soil bacterium	0	0	0	0	0	0	0	0.0105208	0
D_0__Bacteria	D_1__Proteobacteria	D_2__Deltaproteobacteria	D_3__Desulfuromonadales	Other	Other	0	0	0.00350693	0	0	0	0.154305	0.00701385	0
D_0__Bacteria	D_1__Bacteroidetes	D_2__Ignavibacteria	D_3__SJA-28	Other	Other	0	3.35613	4.15921	0.368227	0	0	0.0175346	0.00701385	0
D_0__Bacteria	D_1__Firmicutes	D_2__Clostridia	D_3__Clostridiales	D_4__Eubacteriaceae	D_5__Acetobacterium	0	0	12.5864	0.0385762	0	0	0.00350693	0.00701385	0
D_0__Bacteria	D_1__Chloroflexi	D_2__Anaerolineae	D_3__Anaerolineales	D_4__Anaerolineaceae	D_5__uncultured	0	12.3514	0.00350693	0.462914	0	0	0	0.00701385	0
D_0__Archaea	D_1__Diapherotrites	D_2__Micrarchaeia	D_3__uncultured archaeon	D_4__uncultured archaeon	D_5__uncultured archaeon	0	0	7.58899	0	0	0	0	0.00701385	0
D_0__Bacteria	D_1__Proteobacteria	D_2__Alphaproteobacteria	D_3__Azospirillales	D_4__Azospirillaceae	D_5__Skermanella	0	0	0	0	0	0	0	0.00701385	0
D_0__Archaea	D_1__Euryarchaeota	D_2__Methanomicrobia	D_3__Methanomicrobiales	D_4__Methanoregulaceae	D_5__Methanoregula	0.0350693	0	2.22339	0	0	0	1.51149	0.00350693	0
D_0__Bacteria	D_1__Proteobacteria	D_2__Alphaproteobacteria	D_3__Rhizobiales	D_4__Xanthobacteraceae	Other	0.0175346	0.150798	0	0	0	0	0.157812	0.00350693	0
D_0__Bacteria	D_1__Verrucomicrobia	D_2__Verrucomicrobiae	D_3__B29	D_4__uncultured bacterium	D_5__uncultured bacterium	0	0	3.71033	0	0	0	0.00350693	0.00350693	0
D_0__Bacteria	D_1__Bacteroidetes	D_2__Bacteroidia	D_3__Sphingobacteriales	D_4__Lentimicrobiaceae	Other	0	0	2.23391	0.00701385	0	0.613712	0	0.00350693	0
D_0__Bacteria	D_1__Bacteroidetes	D_2__Bacteroidia	D_3__Bacteroidales	D_4__Prolixibacteraceae	D_5__WCHB1-32	0	0	0.049097	0	0	0	0	0.00350693	0
D_0__Bacteria	D_1__Proteobacteria	D_2__Alphaproteobacteria	D_3__Sphingomonadales	D_4__Sphingomonadaceae	D_5__Sphingosinicella	0	0	0	0	0.00701385	0	20.0386	0	0
D_0__Bacteria	D_1__Proteobacteria	D_2__Alphaproteobacteria	D_3__Caulobacterales	D_4__Caulobacteraceae	D_5__Phenylobacterium	0.049097	0	0.817114	0	0	0	4.4047	0	0
D_0__Bacteria	D_1__Proteobacteria	D_2__Alphaproteobacteria	D_3__Sphingomonadales	D_4__Sphingomonadaceae	Other	1.52201	0	0.0105208	0.00350693	0.0210416	0	2.58811	0	0
D_0__Bacteria	D_1__Gemmatimonadetes	D_2__Gemmatimonadetes	D_3__Gemmatimonadales	D_4__Gemmatimonadaceae	D_5__uncultured	0.0526039	0.0631247	0	0.00701385	0	0	1.02402	0	0
D_0__Bacteria	D_1__Hydrogenedentes	D_2__Hydrogenedentia	D_3__Hydrogenedentiales	D_4__Hydrogenedensaceae	Other	0.00350693	0	0	0	0	0	0.883745	0	0
D_0__Bacteria	D_1__Proteobacteria	D_2__Gammaproteobacteria	D_3__Salinisphaerales	D_4__Solimonadaceae	Other	0.00701385	0	0	0	0	0	0.473435	0	0
D_0__Bacteria	D_1__Proteobacteria	D_2__Deltaproteobacteria	D_3__Desulfarculales	D_4__Desulfarculaceae	D_5__uncultured	0	0	0	0	0	0	0.340172	0	0
D_0__Bacteria	D_1__Acidobacteria	Other	Other	Other	Other	0.00350693	0	0	0	0	0	0.322637	0	0
D_0__Bacteria	D_1__Proteobacteria	D_2__Alphaproteobacteria	D_3__Caulobacterales	D_4__Caulobacteraceae	Other	0.0245485	0	0.00701385	0	0	0	0.287568	0	0
D_0__Bacteria	D_1__Proteobacteria	D_2__Alphaproteobacteria	D_3__uncultured	Other	Other	0.00350693	0	0	0	0	0	0.270033	0	0
D_0__Bacteria	D_1__Proteobacteria	D_2__Alphaproteobacteria	D_3__Rhizobiales	D_4__A0839	Other	0.00350693	0	0	0	0	0	0.266526	0	0
D_0__Bacteria	D_1__Proteobacteria	D_2__Gammaproteobacteria	D_3__Betaproteobacteriales	D_4__Nitrosomonadaceae	D_5__MND1	0.108715	0	0	0	0	0	0.252499	0	0
D_0__Bacteria	D_1__Bacteroidetes	D_2__Bacteroidia	D_3__Bacteroidales	D_4__Tannerellaceae	D_5__Macellibacteroides	0.00350693	0.452393	0	0.231457	0	21.1888	0.231457	0	0
D_0__Bacteria	D_1__Proteobacteria	D_2__Gammaproteobacteria	D_3__Betaproteobacteriales	D_4__Burkholderiaceae	D_5__Rhizobacter	1.59916	0.00350693	0	0	0.210416	0	0.220936	0	0
D_0__Bacteria	D_1__Proteobacteria	D_2__Alphaproteobacteria	D_3__Rhizobiales	Other	Other	0.396283	0.0526039	0	0	0	0	0.217429	0	0
D_0__Bacteria	D_1__Planctomycetes	D_2__OM190	Other	Other	Other	0.00701385	0	0	0	0	0	0.154305	0	0
D_0__Bacteria	D_1__Proteobacteria	D_2__Alphaproteobacteria	D_3__Rhizobiales	D_4__A0839	D_5__uncultured bacterium	0.00350693	0	0	0	0	0	0.150798	0	0
D_0__Bacteria	D_1__Firmicutes	D_2__Clostridia	D_3__Clostridiales	D_4__Clostridiaceae 1	Other	0	0	0.0350693	0.357706	0.0315623	0.294582	0.140277	0	0
D_0__Bacteria	D_1__Proteobacteria	D_2__Alphaproteobacteria	D_3__Reyranellales	D_4__Reyranellaceae	D_5__Reyranella	0	0	0	0	0	0	0.0981939	0	0
D_0__Bacteria	D_1__Proteobacteria	D_2__Alphaproteobacteria	D_3__Acetobacterales	D_4__Acetobacterales Incertae Sedis	D_5__uncultured	0	0	0	0	0	0	0.0876732	0	0
D_0__Bacteria	D_1__Proteobacteria	D_2__Alphaproteobacteria	D_3__Acetobacterales	Other	Other	0	0.00350693	0	0	0	0	0.0841662	0	0
D_0__Bacteria	D_1__Proteobacteria	D_2__Gammaproteobacteria	D_3__Betaproteobacteriales	D_4__Nitrosomonadaceae	Other	0	0	0	0.0140277	0	0	0.0771524	0	0
D_0__Bacteria	D_1__Proteobacteria	D_2__Gammaproteobacteria	D_3__Steroidobacterales	D_4__Steroidobacteraceae	D_5__uncultured	0.00350693	0	0	0	0	0	0.0771524	0	0
D_0__Bacteria	D_1__Planctomycetes	D_2__Phycisphaerae	D_3__Phycisphaerales	D_4__Phycisphaeraceae	D_5__SM1A02	0.0105208	0.224443	0	0.0385762	0	0	0.0526039	0	0
D_0__Bacteria	D_1__Verrucomicrobia	D_2__Verrucomicrobiae	D_3__Pedosphaerales	D_4__Pedosphaeraceae	Other	0.0280554	0.277047	0.256006	0	0	0	0.0526039	0	0
D_0__Bacteria	D_1__Verrucomicrobia	D_2__Verrucomicrobiae	D_3__Opitutales	D_4__Opitutaceae	D_5__Lacunisphaera	0.0140277	0.312116	0	0.094687	0.00350693	0	0.04559	0	0
D_0__Bacteria	D_1__Acidobacteria	D_2__Subgroup 6	D_3__metagenome	D_4__metagenome	D_5__metagenome	0.00701385	0	0	0	0	0	0.0315623	0	0
D_0__Bacteria	D_1__Acidobacteria	D_2__Holophagae	D_3__Subgroup 7	D_4__uncultured Acidobacteria bacterium	D_5__uncultured Acidobacteria bacterium	0	0	0	0	0	0	0.0280554	0	0
D_0__Bacteria	D_1__Actinobacteria	D_2__Acidimicrobiia	D_3__Microtrichales	D_4__Iamiaceae	D_5__Iamia	0	0	0	0	0	0	0.0280554	0	0
D_0__Bacteria	D_1__Armatimonadetes	D_2__Fimbriimonadia	D_3__Fimbriimonadales	D_4__Fimbriimonadaceae	D_5__uncultured bacterium	0	0	0	0	0	0	0.0245485	0	0
D_0__Bacteria	D_1__Proteobacteria	D_2__Gammaproteobacteria	D_3__Xanthomonadales	D_4__Xanthomonadaceae	D_5__Pseudoxanthomonas	0	4.34157	0	0.389269	0	0	0.0210416	0	0
D_0__Bacteria	D_1__Proteobacteria	D_2__Gammaproteobacteria	D_3__Betaproteobacteriales	D_4__Nitrosomonadaceae	D_5__Ellin6067	0	0.0140277	0	0	0	0	0.0210416	0	0
D_0__Bacteria	D_1__Elusimicrobia	D_2__Elusimicrobia	D_3__Lineage IV	D_4__uncultured bacterium	D_5__uncultured bacterium	0.0105208	0	0	0	0	0	0.0210416	0	0
D_0__Bacteria	D_1__Firmicutes	D_2__Clostridia	D_3__Clostridiales	D_4__Syntrophomonadaceae	Other	0	0	0	0	0	0.04559	0.0175346	0	0
D_0__Bacteria	D_1__Firmicutes	D_2__Clostridia	D_3__Clostridiales	D_4__Clostridiaceae 1	D_5__Fonticella	0	0	0.248992	0	0	0.0315623	0.0175346	0	0
D_0__Bacteria	D_1__Firmicutes	D_2__Clostridia	D_3__Clostridiales	D_4__Family XI	D_5__Sedimentibacter	0	0	0	0	0	0.0175346	0.0175346	0	0
D_0__Bacteria	D_1__Firmicutes	D_2__BRH-c20a	D_3__uncultured bacterium	D_4__uncultured bacterium	D_5__uncultured bacterium	0	0	0	0	0	0	0.0175346	0	0
D_0__Bacteria	D_1__Proteobacteria	D_2__Deltaproteobacteria	D_3__Desulfuromonadales	D_4__Geobacteraceae	Other	0	0	0	0	0	0	0.0175346	0	0
D_0__Bacteria	D_1__Proteobacteria	D_2__Gammaproteobacteria	D_3__Betaproteobacteriales	D_4__Rhodocyclaceae	D_5__Propionivibrio	0	0	0	0	0	0	0.0175346	0	0
D_0__Bacteria	D_1__Proteobacteria	D_2__Gammaproteobacteria	D_3__Immundisolibacterales	D_4__Immundisolibacteraceae	Other	0	0	0	0	0	0	0.0175346	0	0
D_0__Bacteria	D_1__Proteobacteria	D_2__Gammaproteobacteria	D_3__JG36-GS-52	D_4__uncultured bacterium	D_5__uncultured bacterium	0	0	0	0	0	0	0.0175346	0	0
D_0__Bacteria	D_1__Actinobacteria	D_2__Thermoleophilia	D_3__Gaiellales	D_4__uncultured	Other	0.0140277	0	0	0	0.00350693	0	0.0140277	0	0
D_0__Bacteria	D_1__Gemmatimonadetes	D_2__Gemmatimonadetes	D_3__Gemmatimonadales	D_4__Gemmatimonadaceae	Other	0	0.00350693	0	0	0	0	0.0140277	0	0
D_0__Bacteria	D_1__Actinobacteria	D_2__Acidimicrobiia	D_3__IMCC26256	Other	Other	0.00350693	0	0	0	0	0	0.0140277	0	0
D_0__Bacteria	D_1__Proteobacteria	D_2__Alphaproteobacteria	D_3__Acetobacterales	D_4__uncultured bacterium	D_5__uncultured bacterium	0	0	0	0	0	0	0.0140277	0	0
D_0__Archaea	D_1__Euryarchaeota	D_2__Methanomicrobia	D_3__Methanosarcinales	D_4__Methanosarcinaceae	D_5__Methanosarcina	0	0	1.00649	0	0	2.63721	0.0105208	0	0
D_0__Bacteria	D_1__Planctomycetes	D_2__Planctomycetacia	D_3__Pirellulales	D_4__Pirellulaceae	D_5__uncultured	0.0140277	0	0	0.0105208	0	0	0.0105208	0	0
D_0__Bacteria	D_1__Proteobacteria	D_2__Alphaproteobacteria	D_3__Caulobacterales	D_4__Hyphomonadaceae	D_5__SWB02	0.0315623	0	0	0	0	0	0.0105208	0	0
D_0__Bacteria	D_1__Proteobacteria	D_2__Alphaproteobacteria	D_3__Rhodospirillales	D_4__Rhodospirillaceae	D_5__uncultured	0	0	0	0	0	0	0.0105208	0	0
D_0__Bacteria	D_1__Firmicutes	D_2__Clostridia	D_3__Clostridiales	Other	Other	0	0	0.0105208	0.0105208	0.00701385	0.00701385	0.00701385	0	0
D_0__Bacteria	D_1__Chloroflexi	D_2__OLB14	Other	Other	Other	0.00701385	0.00350693	0	0.0596177	0	0	0.00701385	0	0
Unclassified	Other	Other	Other	Other	Other	0.00350693	0	0	0	0	0	0.00701385	0	0
D_0__Bacteria	D_1__Chloroflexi	D_2__Anaerolineae	D_3__SBR1031	D_4__A4b	Other	0	0	0	0	0	0	0.00701385	0	0
D_0__Bacteria	D_1__Chloroflexi	D_2__Dehalococcoidia	D_3__S085	D_4__metagenome	D_5__metagenome	0	0	0	0	0	0	0.00701385	0	0
D_0__Bacteria	D_1__Chloroflexi	D_2__TK10	Other	Other	Other	0	0	0	0	0	0	0.00701385	0	0
D_0__Bacteria	D_1__Proteobacteria	D_2__Alphaproteobacteria	D_3__Rhodospirillales	D_4__Rhodopirillaceae	D_5__Defluviicoccus	0	0	0	0	0	0	0.00701385	0	0
D_0__Bacteria	D_1__Firmicutes	D_2__Clostridia	D_3__Clostridiales	D_4__Peptostreptococcaceae	D_5__Paraclostridium	0	0	0	0	0	0.0806593	0.00350693	0	0
D_0__Bacteria	D_1__Proteobacteria	D_2__Alphaproteobacteria	D_3__Rhizobiales	D_4__Pleomorphomonadaceae	D_5__Pleomorphomonas	0	0.00350693	0.00701385	0	0	0.0140277	0.00350693	0	0
D_0__Bacteria	D_1__Bacteroidetes	D_2__Ignavibacteria	D_3__Ignavibacteriales	D_4__BSV40	D_5__uncultured bacterium	0.213922	0	0.0105208	0	0.00350693	0	0.00350693	0	0
D_0__Bacteria	D_1__Chloroflexi	D_2__OLB14	Ambiguous_taxa	Ambiguous_taxa	Ambiguous_taxa	0	0.0105208	0	0.0280554	0	0	0.00350693	0	0
D_0__Bacteria	D_1__Firmicutes	D_2__Clostridia	D_3__Clostridiales	D_4__Syntrophomonadaceae	D_5__uncultured	0	0	0.049097	0	0	0	0.00350693	0	0
D_0__Bacteria	D_1__Acidobacteria	D_2__Subgroup 6	Other	Other	Other	0.00701385	0.0175346	0	0	0	0	0.00350693	0	0
D_0__Bacteria	D_1__Acidobacteria	D_2__Subgroup 22	Other	Other	Other	0	0	0	0	0	0	0.00350693	0	0
D_0__Bacteria	D_1__Firmicutes	D_2__Clostridia	D_3__Clostridiales	D_4__Clostridiaceae 1	D_5__Clostridium sensu stricto 9	0	0	0	0	0	0	0.00350693	0	0
D_0__Bacteria	D_1__Proteobacteria	D_2__Gammaproteobacteria	D_3__Salinisphaerales	D_4__Solimonadaceae	D_5__Fontimonas	0	0	0	0	0	0	0.00350693	0	0
D_0__Bacteria	D_1__Firmicutes	D_2__Clostridia	D_3__Clostridiales	D_4__Peptococcaceae	D_5__Desulfosporosinus	0	0	0	0	0.0140277	34.3398	0	0	0
D_0__Bacteria	D_1__Firmicutes	D_2__Clostridia	D_3__Clostridiales	D_4__Peptococcaceae	D_5__Desulfotomaculum	0	0	0	0.0841662	0	5.16921	0	0	0
D_0__Bacteria	D_1__Proteobacteria	D_2__Gammaproteobacteria	D_3__Aeromonadales	D_4__Aeromonadaceae	D_5__Aeromonas	0	0	0	0.126249	0	1.58513	0	0	0
D_0__Bacteria	D_1__Firmicutes	D_2__Clostridia	D_3__Clostridiales	D_4__Gracilibacteraceae	D_5__Lutispora	0	0	0	0	0	0.880238	0	0	0
D_0__Bacteria	D_1__Firmicutes	D_2__Negativicutes	D_3__Selenomonadales	D_4__Veillonellaceae	D_5__Sporomusa	0	0	0	0	0	0.711906	0	0	0
D_0__Bacteria	D_1__Firmicutes	D_2__Clostridia	D_3__Clostridiales	D_4__Family XIII	D_5__Anaerovorax	0	0	0.0596177	0	0	0.469928	0	0	0
D_0__Bacteria	D_1__Planctomycetes	D_2__Phycisphaerae	D_3__MSBL9	D_4__KCLunmb-38-53	D_5__uncultured bacterium	0	0	0	0	0	0.126249	0	0	0
D_0__Bacteria	D_1__Proteobacteria	D_2__Gammaproteobacteria	D_3__Betaproteobacteriales	D_4__Burkholderiaceae	D_5__Aquabacterium	0	0	0	0.0175346	0	0.0981939	0	0	0
D_0__Bacteria	D_1__Firmicutes	D_2__Clostridia	D_3__Clostridiales	D_4__Peptostreptococcaceae	D_5__Sporacetigenium	0	0	0.904787	0	0	0.049097	0	0	0
D_0__Bacteria	D_1__Chloroflexi	D_2__Anaerolineae	D_3__Anaerolineales	D_4__Anaerolineaceae	D_5__Levilinea	0	0	0.0140277	0	0	0.0420831	0	0	0
D_0__Bacteria	D_1__Firmicutes	D_2__Negativicutes	D_3__Selenomonadales	D_4__Veillonellaceae	D_5__Anaerospora	0	0	0	0	0	0.0420831	0	0	0
D_0__Bacteria	D_1__Firmicutes	D_2__Negativicutes	D_3__Selenomonadales	D_4__Veillonellaceae	Other	0	0	0	0	0	0.0315623	0	0	0
D_0__Bacteria	D_1__Bacteroidetes	D_2__Bacteroidia	D_3__Bacteroidales	D_4__Prolixibacteraceae	D_5__uncultured	0	0	0	0	0	0.0280554	0	0	0
D_0__Bacteria	D_1__Firmicutes	D_2__Clostridia	D_3__Clostridiales	D_4__Gracilibacteraceae	Other	0	0	0	0	0.00701385	0.0175346	0	0	0
D_0__Bacteria	D_1__Bacteroidetes	D_2__Bacteroidia	Other	Other	Other	0.0385762	0.406803	0.00350693	0.0596177	0	0.0175346	0	0	0
D_0__Bacteria	D_1__Firmicutes	D_2__Clostridia	D_3__Clostridiales	D_4__Christensenellaceae	D_5__Christensenellaceae R-7 group	0.00350693	0	0.0245485	0	0	0.0175346	0	0	0
D_0__Bacteria	D_1__Firmicutes	D_2__Clostridia	D_3__Clostridiales	D_4__Peptostreptococcaceae	D_5__Romboutsia	0	0	0	0	0	0.0175346	0	0	0
D_0__Bacteria	D_1__Bacteroidetes	D_2__Bacteroidia	D_3__Flavobacteriales	D_4__Flavobacteriaceae	D_5__Flavobacterium	0	0	0	0.0210416	0	0.0140277	0	0	0
D_0__Bacteria	D_1__Firmicutes	D_2__Negativicutes	D_3__Selenomonadales	D_4__Veillonellaceae	D_5__uncultured	0.0140277	0	0.154305	0	0	0.0140277	0	0	0
D_0__Bacteria	D_1__Firmicutes	D_2__Clostridia	D_3__Clostridiales	D_4__Christensenellaceae	D_5__uncultured	0	0	0	0	0	0.0140277	0	0	0
D_0__Bacteria	D_1__Bacteroidetes	D_2__Bacteroidia	D_3__Bacteroidales	D_4__Paludibacteraceae	D_5__Paludibacter	0	0	0	0	0	0.0105208	0	0	0
D_0__Bacteria	D_1__Firmicutes	D_2__Clostridia	D_3__Clostridiales	D_4__Clostridiaceae 1	D_5__Clostridium sensu stricto 1	0	0	0	0.375241	0.00701385	0.00701385	0	0	0
D_0__Bacteria	D_1__Verrucomicrobia	D_2__Verrucomicrobiae	D_3__Pedosphaerales	D_4__Pedosphaeraceae	D_5__uncultured bacterium	0	0	0.04559	0	0	0.00701385	0	0	0
D_0__Bacteria	D_1__Planctomycetes	D_2__Phycisphaerae	D_3__Pla1 lineage	Other	Other	0.00350693	0	0	0	0	0.00701385	0	0	0
D_0__Bacteria	D_1__Proteobacteria	D_2__Gammaproteobacteria	D_3__Alteromonadales	D_4__Alteromonadaceae	D_5__Rheinheimera	0	0	0	0	0	0.00701385	0	0	0
D_0__Archaea	D_1__Crenarchaeota	D_2__Bathyarchaeia	D_3__uncultured crenarchaeote	D_4__uncultured crenarchaeote	D_5__uncultured crenarchaeote	0.231457	0	0	0	0.0105208	0.00350693	0	0	0
D_0__Bacteria	D_1__Proteobacteria	D_2__Gammaproteobacteria	D_3__Betaproteobacteriales	D_4__Gallionellaceae	Other	7.38909	0	0	0	0	0.00350693	0	0	0
D_0__Bacteria	D_1__Bacteroidetes	D_2__Bacteroidia	D_3__Sphingobacteriales	Other	Other	0.00350693	0	0	0	0	0.00350693	0	0	0
D_0__Bacteria	D_1__Proteobacteria	D_2__Gammaproteobacteria	D_3__Cellvibrionales	D_4__Cellvibrionaceae	D_5__Cellvibrio	0.00350693	0	0	0	0	0.00350693	0	0	0
D_0__Bacteria	D_1__Proteobacteria	D_2__Gammaproteobacteria	D_3__Betaproteobacteriales	D_4__Burkholderiaceae	D_5__Undibacterium	0	0	0	0	0	0.00350693	0	0	0
D_0__Bacteria	D_1__Firmicutes	D_2__Clostridia	D_3__Clostridiales	D_4__Ruminococcaceae	Other	0	0	0	1.27652	0.105208	0	0	0	0
D_0__Bacteria	D_1__Proteobacteria	D_2__Gammaproteobacteria	D_3__Pseudomonadales	D_4__Moraxellaceae	D_5__Acinetobacter	9.88252	0	0	0.04559	0.094687	0	0	0	0
D_0__Bacteria	D_1__WPS-2	Ambiguous_taxa	Ambiguous_taxa	Ambiguous_taxa	Ambiguous_taxa	0	0	0	0.0806593	0.0280554	0	0	0	0
D_0__Bacteria	D_1__Actinobacteria	Other	Other	Other	Other	0.799579	0	0	0	0.0245485	0	0	0	0
D_0__Bacteria	D_1__Actinobacteria	D_2__Actinobacteria	D_3__Propionibacteriales	D_4__Nocardioidaceae	D_5__Nocardioides	7.48378	0.00350693	0	0	0.0210416	0	0	0	0
D_0__Bacteria	D_1__Firmicutes	D_2__Bacilli	D_3__Bacillales	D_4__Paenibacillaceae	D_5__Cohnella	0	0	0	0	0.0210416	0	0	0	0
D_0__Bacteria	D_1__Actinobacteria	D_2__Coriobacteriia	D_3__OPB41	Other	Other	0.0526039	0	0.00350693	0.133263	0.0175346	0	0	0	0
D_0__Bacteria	D_1__Firmicutes	D_2__Bacilli	D_3__Bacillales	Other	Other	0	0	0	0	0.0175346	0	0	0	0
D_0__Bacteria	D_1__Bacteroidetes	D_2__Bacteroidia	D_3__Cytophagales	D_4__Hymenobacteraceae	D_5__Hymenobacter	0.231457	0	0	0	0.0140277	0	0	0	0
D_0__Bacteria	D_1__Proteobacteria	D_2__Alphaproteobacteria	D_3__Rhodobacterales	D_4__Rhodobacteraceae	D_5__Cereibacter	0.0140277	0	0	0	0.0140277	0	0	0	0
D_0__Bacteria	D_1__Proteobacteria	D_2__Alphaproteobacteria	D_3__Rickettsiales	D_4__Mitochondria	Other	0	0	0	0	0.0140277	0	0	0	0
D_0__Bacteria	D_1__Firmicutes	D_2__Clostridia	D_3__Clostridiales	D_4__Lachnospiraceae	Other	0	0	0	0	0.0105208	0	0	0	0
D_0__Bacteria	D_1__Actinobacteria	D_2__Acidimicrobiia	D_3__Microtrichales	D_4__uncultured	Other	0.00350693	0	0	0.213922	0.00701385	0	0	0	0
D_0__Bacteria	D_1__Proteobacteria	D_2__Gammaproteobacteria	D_3__Enterobacteriales	D_4__Enterobacteriaceae	D_5__Escherichia-Shigella	0	0.0841662	0	0.00701385	0.00701385	0	0	0	0
D_0__Bacteria	D_1__Proteobacteria	D_2__Alphaproteobacteria	D_3__Rhizobiales	D_4__Beijerinckiaceae	D_5__uncultured	0	0	0	0.00350693	0.00701385	0	0	0	0
D_0__Bacteria	D_1__Patescibacteria	D_2__ABY1	D_3__Candidatus Magasanikbacteria	Other	Other	0.00350693	0	0.0350693	0	0.00701385	0	0	0	0
D_0__Bacteria	D_1__Proteobacteria	D_2__Gammaproteobacteria	D_3__WD260	D_4__uncultured bacterium	D_5__uncultured bacterium	0	0	0	0.305103	0.00350693	0	0	0	0
D_0__Bacteria	D_1__Firmicutes	D_2__Clostridia	D_3__Clostridiales	D_4__Family XI	D_5__Peptoniphilus	0	0	0	0.157812	0.00350693	0	0	0	0
D_0__Bacteria	D_1__Actinobacteria	D_2__Acidimicrobiia	D_3__uncultured	Other	Other	0	0	0	0.0911801	0.00350693	0	0	0	0
D_0__Bacteria	D_1__Acidobacteria	D_2__Acidobacteriia	D_3__Acidobacteriales	D_4__Acidobacteriaceae (Subgroup 1)	D_5__uncultured	0	0	0	0.0736454	0.00350693	0	0	0	0
D_0__Bacteria	D_1__Proteobacteria	D_2__Alphaproteobacteria	D_3__Rhodobacterales	D_4__Rhodobacteraceae	Other	0.680344	0	0	0.0385762	0.00350693	0	0	0	0
D_0__Bacteria	D_1__Proteobacteria	D_2__Deltaproteobacteria	D_3__Myxococcales	Other	Other	1.88673	0.0315623	0.287568	0	0.00350693	0	0	0	0
D_0__Bacteria	D_1__Omnitrophicaeota	Other	Other	Other	Other	1.70086	0.00350693	0	0	0.00350693	0	0	0	0
D_0__Bacteria	D_1__Rokubacteria	D_2__NC10	D_3__Rokubacteriales	Other	Other	0.119235	0.00350693	0	0	0.00350693	0	0	0	0
D_0__Bacteria	D_1__Planctomycetes	Other	Other	Other	Other	0.126249	0	0	0	0.00350693	0	0	0	0
D_0__Bacteria	D_1__Proteobacteria	D_2__Alphaproteobacteria	D_3__Sphingomonadales	D_4__Sphingomonadaceae	D_5__Sphingomonas	0.112222	0	0	0	0.00350693	0	0	0	0
D_0__Bacteria	D_1__Proteobacteria	D_2__Deltaproteobacteria	D_3__NKB15	Other	Other	0.108715	0	0	0	0.00350693	0	0	0	0
D_0__Bacteria	D_1__Omnitrophicaeota	D_2__Omnitrophica WOR_2 bacterium GWF2_63_9	D_3__Omnitrophica WOR_2 bacterium GWF2_63_9	D_4__Omnitrophica WOR_2 bacterium GWF2_63_9	D_5__Omnitrophica WOR_2 bacterium GWF2_63_9	0.0876732	0	0	0	0.00350693	0	0	0	0
D_0__Bacteria	D_1__Proteobacteria	D_2__Deltaproteobacteria	D_3__Sva0485	Ambiguous_taxa	Ambiguous_taxa	0.0385762	0	0	0	0.00350693	0	0	0	0
D_0__Bacteria	D_1__Armatimonadetes	D_2__uncultured	Other	Other	Other	0.00701385	0	0	0	0.00350693	0	0	0	0
D_0__Bacteria	D_1__Actinobacteria	D_2__RBG-16-55-12	Other	Other	Other	0.00350693	0	0	0	0.00350693	0	0	0	0
D_0__Bacteria	D_1__Actinobacteria	D_2__Actinobacteria	D_3__Micrococcales	D_4__Micrococcaceae	D_5__Micrococcus	0	0	0	0	0.00350693	0	0	0	0
D_0__Bacteria	D_1__Firmicutes	D_2__Clostridia	D_3__Clostridiales	D_4__Clostridiaceae 1	D_5__Oxobacter	0	0	0	0	0.00350693	0	0	0	0
D_0__Bacteria	D_1__Proteobacteria	D_2__Alphaproteobacteria	D_3__Acetobacterales	D_4__Acetobacteraceae	D_5__Acidisoma	0	0	0	0	0.00350693	0	0	0	0
D_0__Bacteria	D_1__Proteobacteria	D_2__Gammaproteobacteria	D_3__Betaproteobacteriales	D_4__Methylophilaceae	D_5__Methylobacillus	0	0	0	0	0.00350693	0	0	0	0
D_0__Bacteria	D_1__Proteobacteria	D_2__Gammaproteobacteria	D_3__Vibrionales	D_4__Vibrionaceae	D_5__Vibrio	0	0	0	0	0.00350693	0	0	0	0
D_0__Bacteria	D_1__Proteobacteria	D_2__Gammaproteobacteria	D_3__Betaproteobacteriales	D_4__Rhodocyclaceae	D_5__Denitratisoma	0.312116	39.723	0	3.23339	0	0	0	0	0
D_0__Bacteria	D_1__Bacteroidetes	D_2__Ignavibacteria	D_3__Kryptoniales	D_4__BSV26	Other	0.403297	5.23233	0	0.54708	0	0	0	0	0
D_0__Bacteria	D_1__Bacteroidetes	D_2__Bacteroidia	D_3__Flavobacteriales	D_4__Weeksellaceae	D_5__Chryseobacterium	0.0736454	5.69876	0	0.476942	0	0	0	0	0
D_0__Bacteria	D_1__Patescibacteria	D_2__Parcubacteria	Other	Other	Other	0.0140277	1.86919	0	0.252499	0	0	0	0	0
D_0__Bacteria	D_1__Proteobacteria	D_2__Alphaproteobacteria	D_3__Reyranellales	D_4__Reyranellaceae	D_5__uncultured	0	0	0	0.175346	0	0	0	0	0
D_0__Bacteria	D_1__Bacteroidetes	D_2__Bacteroidia	D_3__Sphingobacteriales	D_4__Sphingobacteriaceae	D_5__Sphingobacterium	0	0.00350693	0	0.13677	0	0	0	0	0
D_0__Bacteria	D_1__Cyanobacteria	D_2__Oxyphotobacteria	D_3__Oxyphotobacteria Incertae Sedis	D_4__Unknown Family	D_5__CENA384	0	0	0	0.133263	0	0	0	0	0
D_0__Bacteria	D_1__Acidobacteria	D_2__Holophagae	D_3__Holophagales	D_4__Holophagaceae	D_5__Geothrix	0.119235	0.866211	0	0.122742	0	0	0	0	0
D_0__Bacteria	D_1__Chloroflexi	D_2__JG30-KF-CM66	Other	Other	Other	0.0701385	0	0	0.101701	0	0	0	0	0
D_0__Bacteria	D_1__Proteobacteria	D_2__Alphaproteobacteria	D_3__Rhizobiales	D_4__Beijerinckiaceae	D_5__Microvirga	0	0	0	0.101701	0	0	0	0	0
D_0__Bacteria	D_1__Actinobacteria	D_2__Thermoleophilia	D_3__Solirubrobacterales	D_4__Solirubrobacteraceae	D_5__Conexibacter	0.0105208	0	0	0.0981939	0	0	0	0	0
D_0__Bacteria	D_1__Bacteroidetes	D_2__Bacteroidia	D_3__Bacteroidales	D_4__Porphyromonadaceae	D_5__Porphyromonas	0	0	0	0.094687	0	0	0	0	0
D_0__Bacteria	D_1__Proteobacteria	D_2__Deltaproteobacteria	D_3__Myxococcales	D_4__Haliangiaceae	D_5__Haliangium	0.0210416	0	0	0.0876732	0	0	0	0	0
D_0__Bacteria	D_1__Bacteroidetes	D_2__Bacteroidia	D_3__Chitinophagales	D_4__Chitinophagaceae	D_5__Lacibacter	0	0	0	0.0876732	0	0	0	0	0
D_0__Bacteria	D_1__Proteobacteria	D_2__Alphaproteobacteria	D_3__Rhizobiales	D_4__Hyphomicrobiaceae	D_5__Hyphomicrobium	0.0105208	0.0140277	0	0.0841662	0	0	0	0	0
D_0__Bacteria	D_1__Proteobacteria	D_2__Alphaproteobacteria	D_3__Rhizobiales	D_4__Beijerinckiaceae	D_5__Methylobacterium	0.00350693	0	0	0.0841662	0	0	0	0	0
D_0__Bacteria	D_1__Firmicutes	D_2__Bacilli	D_3__Bacillales	D_4__Bacillaceae	D_5__Marinococcus	0	0	0	0.0841662	0	0	0	0	0
D_0__Bacteria	D_1__Chloroflexi	D_2__Anaerolineae	D_3__SBR1031	Other	Other	0.00350693	0	0	0.0771524	0	0	0	0	0
D_0__Bacteria	D_1__Bacteroidetes	D_2__Bacteroidia	D_3__Sphingobacteriales	D_4__Sphingobacteriaceae	Other	0	0	0	0.0771524	0	0	0	0	0
D_0__Bacteria	D_1__Bacteroidetes	D_2__Bacteroidia	D_3__Chitinophagales	D_4__Chitinophagaceae	D_5__Sediminibacterium	0	0.852183	0	0.0736454	0	0	0	0	0
D_0__Bacteria	D_1__Firmicutes	D_2__Bacilli	D_3__Lactobacillales	D_4__Leuconostocaceae	D_5__Weissella	0	0	0	0.0631247	0	0	0	0	0
D_0__Bacteria	D_1__Firmicutes	D_2__Clostridia	D_3__Clostridiales	D_4__Peptostreptococcaceae	D_5__Filifactor	0	0	0	0.0596177	0	0	0	0	0
D_0__Bacteria	D_1__Proteobacteria	D_2__Alphaproteobacteria	D_3__Sphingomonadales	D_4__Sphingomonadaceae	D_5__Porphyrobacter	0.0736454	0	0	0.0561108	0	0	0	0	0
D_0__Bacteria	D_1__Bacteroidetes	D_2__Bacteroidia	D_3__Flavobacteriales	D_4__Weeksellaceae	D_5__Cloacibacterium	0	0	0	0.0561108	0	0	0	0	0
D_0__Bacteria	D_1__Bacteroidetes	D_2__Ignavibacteria	D_3__Kryptoniales	D_4__Kryptoniaceae	D_5__uncultured bacterium	0	0	0	0.0526039	0	0	0	0	0
D_0__Bacteria	D_1__Chloroflexi	D_2__Chloroflexia	Other	Other	Other	0	0	0	0.0526039	0	0	0	0	0
D_0__Bacteria	D_1__Proteobacteria	D_2__Alphaproteobacteria	D_3__Caulobacterales	D_4__Caulobacteraceae	D_5__Caulobacter	0	0	0	0.0526039	0	0	0	0	0
D_0__Bacteria	D_1__Actinobacteria	D_2__Acidimicrobiia	D_3__Microtrichales	D_4__Ilumatobacteraceae	D_5__uncultured	0.108715	0	0	0.04559	0	0	0	0	0
D_0__Bacteria	D_1__Actinobacteria	D_2__Actinobacteria	D_3__Propionibacteriales	D_4__Nocardioidaceae	Other	0.0841662	0	0	0.04559	0	0	0	0	0
D_0__Bacteria	D_1__Bacteroidetes	D_2__Bacteroidia	D_3__Bacteroidales	D_4__Prevotellaceae	D_5__Prevotella	0	0	0	0.04559	0	0	0	0	0
D_0__Bacteria	D_1__Proteobacteria	D_2__Alphaproteobacteria	D_3__Sphingomonadales	D_4__Sphingomonadaceae	D_5__Novosphingobium	0.0350693	0	0	0.0420831	0	0	0	0	0
D_0__Bacteria	D_1__Actinobacteria	D_2__Acidimicrobiia	D_3__Microtrichales	D_4__Ilumatobacteraceae	D_5__CL500-29 marine group	0	0	0	0.0350693	0	0	0	0	0
D_0__Bacteria	D_1__Proteobacteria	D_2__Gammaproteobacteria	D_3__Pseudomonadales	D_4__Pseudomonadaceae	D_5__Pseudomonas	0	0	0	0.0350693	0	0	0	0	0
D_0__Bacteria	D_1__Proteobacteria	D_2__Gammaproteobacteria	D_3__Oceanospirillales	D_4__Halomonadaceae	D_5__HdN1	0	0	0	0.0280554	0	0	0	0	0
D_0__Bacteria	D_1__Chloroflexi	D_2__Anaerolineae	Other	Other	Other	0.0175346	0	0.0140277	0.0245485	0	0	0	0	0
D_0__Bacteria	D_1__Proteobacteria	D_2__Gammaproteobacteria	D_3__Betaproteobacteriales	D_4__Burkholderiaceae	D_5__Achromobacter	0	0.108715	0	0.0245485	0	0	0	0	0
D_0__Bacteria	D_1__Proteobacteria	D_2__Alphaproteobacteria	D_3__Acetobacterales	D_4__Acetobacteraceae	D_5__Craurococcus	0.0841662	0	0	0.0175346	0	0	0	0	0
D_0__Bacteria	D_1__Firmicutes	D_2__Bacilli	D_3__Bacillales	D_4__Bacillaceae	Other	0	0	0	0.0175346	0	0	0	0	0
D_0__Bacteria	D_1__Proteobacteria	D_2__Alphaproteobacteria	D_3__Sphingomonadales	D_4__Sphingomonadaceae	D_5__Sphingorhabdus	0	0	0	0.0175346	0	0	0	0	0
D_0__Bacteria	D_1__Chloroflexi	Other	Other	Other	Other	0.431352	0	0	0.0140277	0	0	0	0	0
D_0__Bacteria	D_1__Actinobacteria	D_2__Actinobacteria	D_3__Corynebacteriales	D_4__Corynebacteriaceae	D_5__Corynebacterium	0.00350693	0	0	0.0140277	0	0	0	0	0
D_0__Bacteria	D_1__Fusobacteria	D_2__Fusobacteriia	D_3__Fusobacteriales	D_4__Leptotrichiaceae	D_5__Leptotrichia	0	0	0	0.0140277	0	0	0	0	0
D_0__Bacteria	D_1__Proteobacteria	D_2__Gammaproteobacteria	D_3__Betaproteobacteriales	D_4__Burkholderiaceae	D_5__Acidovorax	0.00350693	0.00350693	0	0.0105208	0	0	0	0	0
D_0__Bacteria	D_1__Acidobacteria	D_2__Acidobacteriia	D_3__Acidobacteriales	D_4__Acidobacteriaceae (Subgroup 1)	D_5__Occallatibacter	0	0	0	0.0105208	0	0	0	0	0
D_0__Bacteria	D_1__Proteobacteria	D_2__Gammaproteobacteria	D_3__Pseudomonadales	D_4__Moraxellaceae	D_5__Alkanindiges	2.29002	0	0	0.00701385	0	0	0	0	0
D_0__Bacteria	D_1__Proteobacteria	D_2__Alphaproteobacteria	D_3__Acetobacterales	D_4__Acetobacteraceae	D_5__Roseomonas	0.0175346	0	0	0.00701385	0	0	0	0	0
D_0__Bacteria	D_1__Firmicutes	D_2__Bacilli	D_3__Bacillales	D_4__Staphylococcaceae	D_5__Staphylococcus	0.00350693	0	0	0.00701385	0	0	0	0	0
D_0__Bacteria	D_1__Firmicutes	D_2__Bacilli	D_3__Lactobacillales	D_4__Streptococcaceae	D_5__Streptococcus	0	0	0	0.00701385	0	0	0	0	0
D_0__Bacteria	D_1__Proteobacteria	D_2__Alphaproteobacteria	D_3__Rhodobacterales	D_4__Rhodobacteraceae	D_5__Rhodobacter	0	0	0	0.00701385	0	0	0	0	0
D_0__Bacteria	D_1__Proteobacteria	D_2__Gammaproteobacteria	D_3__Betaproteobacteriales	D_4__Burkholderiaceae	D_5__Hydrogenophaga	0	0	0	0.00701385	0	0	0	0	0
D_0__Bacteria	D_1__Proteobacteria	D_2__Alphaproteobacteria	D_3__Rhodobacterales	D_4__Rhodobacteraceae	D_5__Paracoccus	0.0736454	0	0	0.00350693	0	0	0	0	0
D_0__Bacteria	D_1__Proteobacteria	D_2__Gammaproteobacteria	D_3__Pseudomonadales	D_4__Moraxellaceae	D_5__Enhydrobacter	0.0315623	0	0	0.00350693	0	0	0	0	0
D_0__Bacteria	D_1__Proteobacteria	D_2__Gammaproteobacteria	D_3__Betaproteobacteriales	D_4__Sulfuricellaceae	D_5__Sulfuriferula	0	0	0	0.00350693	0	0	0	0	0
D_0__Archaea	D_1__Crenarchaeota	D_2__Bathyarchaeia	Ambiguous_taxa	Ambiguous_taxa	Ambiguous_taxa	0	0	4.36963	0	0	0	0	0	0
D_0__Bacteria	D_1__Proteobacteria	D_2__Deltaproteobacteria	D_3__Deltaproteobacteria Incertae Sedis	D_4__Syntrophorhabdaceae	D_5__Syntrophorhabdus	0.0140277	0	0.30861	0	0	0	0	0	0
D_0__Bacteria	D_1__Proteobacteria	D_2__Deltaproteobacteria	D_3__Syntrophobacterales	D_4__Syntrophaceae	D_5__uncultured	0.0420831	0	0.224443	0	0	0	0	0	0
D_0__Bacteria	D_1__Elusimicrobia	D_2__Elusimicrobia	D_3__Lineage IV	Other	Other	0.049097	0	0.129756	0	0	0	0	0	0
D_0__Bacteria	D_1__Acidobacteria	D_2__Acidobacteriia	D_3__Solibacterales	D_4__Solibacteraceae (Subgroup 3)	D_5__Paludibaculum	0	0	0.112222	0	0	0	0	0	0
D_0__Bacteria	D_1__Patescibacteria	D_2__Gracilibacteria	Other	Other	Other	0.0911801	0	0.105208	0	0	0	0	0	0
D_0__Bacteria	D_1__Proteobacteria	D_2__Deltaproteobacteria	D_3__Syntrophobacterales	D_4__Syntrophaceae	D_5__Smithella	0.0911801	0	0.0876732	0	0	0	0	0	0
D_0__Bacteria	D_1__Bacteroidetes	D_2__Bacteroidia	D_3__Bacteroidales	D_4__Rikenellaceae	D_5__Blvii28 wastewater-sludge group	0	0	0.0876732	0	0	0	0	0	0
D_0__Bacteria	D_1__Chloroflexi	D_2__Anaerolineae	D_3__Anaerolineales	D_4__Anaerolineaceae	Other	0.00701385	0.00701385	0.0736454	0	0	0	0	0	0
D_0__Bacteria	D_1__Acidobacteria	D_2__Acidobacteriia	D_3__Solibacterales	D_4__Solibacteraceae (Subgroup 3)	D_5__Bryobacter	0	0	0.0666316	0	0	0	0	0	0
D_0__Archaea	D_1__Crenarchaeota	D_2__Bathyarchaeia	Other	Other	Other	0.245485	0	0.0526039	0	0	0	0	0	0
D_0__Bacteria	D_1__Verrucomicrobia	D_2__Verrucomicrobiae	D_3__Opitutales	D_4__Opitutaceae	Other	0	0	0.0315623	0	0	0	0	0	0
D_0__Bacteria	D_1__Bacteroidetes	D_2__Ignavibacteria	D_3__Ignavibacteriales	D_4__BSV40	Other	0	0	0.0245485	0	0	0	0	0	0
D_0__Bacteria	D_1__Bacteroidetes	D_2__Ignavibacteria	D_3__OPB56	D_4__uncultured bacterium	D_5__uncultured bacterium	0	0.0210416	0.0175346	0	0	0	0	0	0
D_0__Bacteria	D_1__Firmicutes	D_2__Clostridia	D_3__Clostridiales	D_4__Peptostreptococcaceae	Other	0	0	0.0175346	0	0	0	0	0	0
D_0__Bacteria	D_1__Proteobacteria	D_2__Deltaproteobacteria	D_3__Myxococcales	D_4__Archangiaceae	D_5__Anaeromyxobacter	0	0	0.0175346	0	0	0	0	0	0
D_0__Bacteria	D_1__Bacteroidetes	D_2__Bacteroidia	D_3__Sphingobacteriales	D_4__Lentimicrobiaceae	Ambiguous_taxa	0	0	0.0140277	0	0	0	0	0	0
D_0__Bacteria	D_1__Chloroflexi	D_2__Anaerolineae	D_3__Anaerolineales	D_4__Anaerolineaceae	D_5__Anaerolinea	0	0	0.0140277	0	0	0	0	0	0
D_0__Bacteria	D_1__Planctomycetes	D_2__Planctomycetacia	D_3__Pirellulales	D_4__Pirellulaceae	Other	0.0175346	0	0.0105208	0	0	0	0	0	0
D_0__Bacteria	D_1__Spirochaetes	D_2__MVP-15	D_3__uncultured bacterium	D_4__uncultured bacterium	D_5__uncultured bacterium	0.0105208	0	0.0105208	0	0	0	0	0	0
D_0__Archaea	D_1__Euryarchaeota	D_2__Methanomicrobia	D_3__Methanosarcinales	D_4__Methanosaetaceae	D_5__Methanosaeta	0.00701385	0	0.0105208	0	0	0	0	0	0
D_0__Bacteria	D_1__Bacteroidetes	D_2__Ignavibacteria	D_3__Kryptoniales	D_4__BSV26	Ambiguous_taxa	0.00350693	0	0.0105208	0	0	0	0	0	0
D_0__Bacteria	D_1__Bacteroidetes	D_2__Ignavibacteria	Other	Other	Other	0	0	0.0105208	0	0	0	0	0	0
D_0__Bacteria	D_1__Chloroflexi	D_2__Anaerolineae	D_3__Anaerolineales	D_4__Anaerolineaceae	D_5__Leptolinea	0	0	0.0105208	0	0	0	0	0	0
D_0__Bacteria	D_1__Gemmatimonadetes	D_2__MD2902-B12	Other	Other	Other	0	0	0.0105208	0	0	0	0	0	0
D_0__Bacteria	D_1__Spirochaetes	D_2__Spirochaetia	D_3__Spirochaetales	D_4__Spirochaetaceae	D_5__Spirochaeta 2	0	0	0.0105208	0	0	0	0	0	0
D_0__Bacteria	D_1__Nitrospirae	D_2__Thermodesulfovibrionia	D_3__uncultured	Other	Other	0.0526039	0	0.00701385	0	0	0	0	0	0
D_0__Archaea	D_1__Euryarchaeota	D_2__Methanobacteria	D_3__Methanobacteriales	D_4__Methanobacteriaceae	D_5__Methanobacterium	0.0350693	0	0.00701385	0	0	0	0	0	0
D_0__Archaea	D_1__Diapherotrites	D_2__Micrarchaeia	Other	Other	Other	0.0245485	0	0.00701385	0	0	0	0	0	0
D_0__Bacteria	D_1__Proteobacteria	D_2__Deltaproteobacteria	D_3__Syntrophobacterales	D_4__Syntrophaceae	D_5__Desulfomonile	0.00350693	0	0.00701385	0	0	0	0	0	0
D_0__Archaea	D_1__Euryarchaeota	D_2__Thermoplasmata	D_3__Methanomassiliicoccales	D_4__Methanomassiliicoccaceae	D_5__uncultured	0	0	0.00701385	0	0	0	0	0	0
D_0__Bacteria	D_1__Firmicutes	D_2__Clostridia	D_3__Clostridiales	D_4__Clostridiaceae 1	D_5__Youngiibacter	0	0	0.00701385	0	0	0	0	0	0
D_0__Bacteria	D_1__Firmicutes	D_2__Clostridia	D_3__Clostridiales	D_4__Syntrophomonadaceae	D_5__Syntrophomonas	0	0	0.00701385	0	0	0	0	0	0
D_0__Bacteria	D_1__Verrucomicrobia	D_2__Verrucomicrobiae	Other	Other	Other	0	0	0.00701385	0	0	0	0	0	0
D_0__Bacteria	D_1__Bacteroidetes	D_2__Ignavibacteria	D_3__SJA-28	D_4__uncultured bacterium	D_5__uncultured bacterium	0	0.00701385	0.00350693	0	0	0	0	0	0
D_0__Bacteria	D_1__Rokubacteria	D_2__NC10	D_3__Methylomirabilales	D_4__Methylomirabilaceae	D_5__Sh765B-TzT-35	0.0526039	0	0.00350693	0	0	0	0	0	0
D_0__Archaea	Other	Other	Other	Other	Other	0.04559	0	0.00350693	0	0	0	0	0	0
D_0__Archaea	D_1__Nanoarchaeaeota	D_2__Nanohaloarchaeia	D_3__Aenigmarchaeales	Other	Other	0.0210416	0	0.00350693	0	0	0	0	0	0
D_0__Bacteria	D_1__Proteobacteria	D_2__Deltaproteobacteria	D_3__Syntrophobacterales	D_4__Syntrophaceae	D_5__Syntrophus	0.0105208	0	0.00350693	0	0	0	0	0	0
D_0__Bacteria	D_1__Patescibacteria	D_2__Parcubacteria	D_3__Candidatus Nomurabacteria	Other	Other	0.00701385	0	0.00350693	0	0	0	0	0	0
D_0__Bacteria	D_1__Bacteroidetes	D_2__Bacteroidia	D_3__Bacteroidales	D_4__Bacteroidetes vadinHA17	Ambiguous_taxa	0.00350693	0	0.00350693	0	0	0	0	0	0
D_0__Bacteria	D_1__Bacteroidetes	D_2__Bacteroidia	D_3__Cytophagales	D_4__Cyclobacteriaceae	D_5__Cecembia	0	0	0.00350693	0	0	0	0	0	0
D_0__Bacteria	D_1__Firmicutes	D_2__Clostridia	D_3__Clostridiales	D_4__Family XIII	Other	0	0	0.00350693	0	0	0	0	0	0
D_0__Bacteria	D_1__Proteobacteria	D_2__Deltaproteobacteria	D_3__Desulfobacterales	D_4__Desulfobacteraceae	D_5__Sva0081 sediment group	0	0	0.00350693	0	0	0	0	0	0
D_0__Bacteria	D_1__Spirochaetes	D_2__Spirochaetia	D_3__Spirochaetales	D_4__Spirochaetaceae	D_5__Treponema	0	0	0.00350693	0	0	0	0	0	0
D_0__Bacteria	D_1__Proteobacteria	D_2__Alphaproteobacteria	D_3__Sneathiellales	D_4__Sneathiellaceae	Other	0	0.326144	0	0	0	0	0	0	0
D_0__Bacteria	D_1__Proteobacteria	D_2__Alphaproteobacteria	D_3__Rhizobiales	D_4__Rhizobiaceae	D_5__Ochrobactrum	0.00701385	0.157812	0	0	0	0	0	0	0
D_0__Bacteria	D_1__Bacteroidetes	D_2__Ignavibacteria	D_3__Kryptoniales	D_4__BSV26	D_5__denitrifying bacterium enrichment culture clone NOB_2_A7	0	0.0526039	0	0	0	0	0	0	0
D_0__Bacteria	D_1__Proteobacteria	D_2__Gammaproteobacteria	D_3__Xanthomonadales	Other	Other	0.0105208	0.0210416	0	0	0	0	0	0	0
D_0__Bacteria	D_1__Dadabacteria	D_2__Dadabacteriia	D_3__Dadabacteriales	Other	Other	0.00701385	0.0140277	0	0	0	0	0	0	0
D_0__Bacteria	D_1__Omnitrophicaeota	D_2__uncultured bacterium	D_3__uncultured bacterium	D_4__uncultured bacterium	D_5__uncultured bacterium	0.845169	0.00701385	0	0	0	0	0	0	0
D_0__Bacteria	D_1__Proteobacteria	D_2__Gammaproteobacteria	D_3__Betaproteobacteriales	D_4__Methylophilaceae	Ambiguous_taxa	0.00701385	0.00701385	0	0	0	0	0	0	0
D_0__Bacteria	D_1__Proteobacteria	D_2__Alphaproteobacteria	D_3__Rhizobiales	D_4__Hyphomicrobiaceae	Other	0.0526039	0.00350693	0	0	0	0	0	0	0
D_0__Bacteria	D_1__Bacteroidetes	D_2__Bacteroidia	D_3__Chitinophagales	D_4__Chitinophagaceae	Other	0.0210416	0.00350693	0	0	0	0	0	0	0
D_0__Bacteria	D_1__Proteobacteria	D_2__Gammaproteobacteria	D_3__Xanthomonadales	D_4__Xanthomonadaceae	Other	0.0210416	0.00350693	0	0	0	0	0	0	0
D_0__Bacteria	D_1__Bacteroidetes	Other	Other	Other	Other	0.00701385	0.00350693	0	0	0	0	0	0	0
D_0__Bacteria	D_1__Proteobacteria	D_2__Gammaproteobacteria	D_3__Betaproteobacteriales	D_4__Methylophilaceae	Other	0.00701385	0.00350693	0	0	0	0	0	0	0
D_0__Bacteria	D_1__Proteobacteria	D_2__Gammaproteobacteria	D_3__Betaproteobacteriales	D_4__Rhodocyclaceae	D_5__Sulfuritalea	0.00350693	0.00350693	0	0	0	0	0	0	0
D_0__Bacteria	D_1__Acidobacteria	D_2__Holophagae	D_3__Subgroup 7	D_4__uncultured Acidobacteriales bacterium	D_5__uncultured Acidobacteriales bacterium	0	0.00350693	0	0	0	0	0	0	0
D_0__Bacteria	D_1__Bacteroidetes	D_2__Bacteroidia	D_3__Flavobacteriales	D_4__Weeksellaceae	Other	0	0.00350693	0	0	0	0	0	0	0
D_0__Bacteria	D_1__Chloroflexi	D_2__KD4-96	D_3__uncultured bacterium	D_4__uncultured bacterium	D_5__uncultured bacterium	0	0.00350693	0	0	0	0	0	0	0
D_0__Bacteria	D_1__Proteobacteria	D_2__Gammaproteobacteria	D_3__Betaproteobacteriales	D_4__Burkholderiaceae	D_5__Ramlibacter	0	0.00350693	0	0	0	0	0	0	0
D_0__Bacteria	D_1__Nitrospirae	D_2__BMS9AB35	Other	Other	Other	5.71629	0	0	0	0	0	0	0	0
D_0__Bacteria	D_1__Proteobacteria	D_2__Gammaproteobacteria	D_3__Betaproteobacteriales	D_4__Gallionellaceae	D_5__Sideroxydans	3.12116	0	0	0	0	0	0	0	0
D_0__Bacteria	D_1__Actinobacteria	D_2__Actinobacteria	D_3__Micrococcales	D_4__Intrasporangiaceae	Other	2.88971	0	0	0	0	0	0	0	0
D_0__Archaea	D_1__Euryarchaeota	D_2__Methanomicrobia	D_3__Methanosarcinales	D_4__Methanoperedenaceae	D_5__Candidatus Methanoperedens	0.775031	0	0	0	0	0	0	0	0
D_0__Bacteria	D_1__Proteobacteria	D_2__Alphaproteobacteria	D_3__Rhizobiales	D_4__Beijerinckiaceae	Other	0.687358	0	0	0	0	0	0	0	0
D_0__Bacteria	D_1__Actinobacteria	D_2__Actinobacteria	D_3__Micrococcales	D_4__Intrasporangiaceae	D_5__Ornithinimicrobium	0.624233	0	0	0	0	0	0	0	0
D_0__Bacteria	D_1__Actinobacteria	D_2__Actinobacteria	D_3__Micrococcales	Other	Other	0.568122	0	0	0	0	0	0	0	0
D_0__Bacteria	D_1__Chloroflexi	D_2__Anaerolineae	D_3__RBG-13-54-9	D_4__uncultured prokaryote	D_5__uncultured prokaryote	0.557601	0	0	0	0	0	0	0	0
D_0__Bacteria	D_1__Proteobacteria	D_2__Gammaproteobacteria	D_3__Pseudomonadales	D_4__Moraxellaceae	Other	0.508504	0	0	0	0	0	0	0	0
D_0__Bacteria	D_1__Proteobacteria	D_2__Gammaproteobacteria	D_3__Betaproteobacteriales	D_4__Burkholderiaceae	D_5__Massilia	0.473435	0	0	0	0	0	0	0	0
D_0__Bacteria	D_1__Proteobacteria	D_2__Deltaproteobacteria	D_3__Sva0485	Other	Other	0.389269	0	0	0	0	0	0	0	0
D_0__Bacteria	D_1__Actinobacteria	D_2__Actinobacteria	D_3__Micrococcales	D_4__Dermacoccaceae	Other	0.371734	0	0	0	0	0	0	0	0
D_0__Bacteria	D_1__Chloroflexi	D_2__JG30-KF-CM66	Ambiguous_taxa	Ambiguous_taxa	Ambiguous_taxa	0.36472	0	0	0	0	0	0	0	0
D_0__Bacteria	D_1__Chloroflexi	D_2__Dehalococcoidia	D_3__S085	D_4__uncultured bacterium	D_5__uncultured bacterium	0.326144	0	0	0	0	0	0	0	0
D_0__Bacteria	D_1__Proteobacteria	D_2__Gammaproteobacteria	D_3__Methylococcales	D_4__Methylococcaceae	Other	0.287568	0	0	0	0	0	0	0	0
D_0__Bacteria	D_1__Actinobacteria	D_2__Actinobacteria	D_3__Micrococcales	D_4__Intrasporangiaceae	D_5__Tetrasphaera	0.280554	0	0	0	0	0	0	0	0
D_0__Bacteria	D_1__Nitrospirae	D_2__Nitrospira	D_3__Nitrospirales	D_4__Nitrospiraceae	D_5__Nitrospira	0.266526	0	0	0	0	0	0	0	0
D_0__Archaea	D_1__Euryarchaeota	D_2__Thermoplasmata	D_3__uncultured	D_4__uncultured archaeon	D_5__uncultured archaeon	0.241978	0	0	0	0	0	0	0	0
D_0__Bacteria	D_1__Proteobacteria	D_2__Deltaproteobacteria	D_3__Myxococcales	D_4__Sandaracinaceae	D_5__uncultured	0.210416	0	0	0	0	0	0	0	0
D_0__Archaea	D_1__Nanoarchaeaeota	D_2__Woesearchaeia	Other	Other	Other	0.168332	0	0	0	0	0	0	0	0
D_0__Bacteria	D_1__Proteobacteria	D_2__Alphaproteobacteria	D_3__Sphingomonadales	D_4__Sphingomonadaceae	D_5__Qipengyuania	0.161319	0	0	0	0	0	0	0	0
D_0__Bacteria	D_1__Bacteroidetes	D_2__Bacteroidia	D_3__Cytophagales	D_4__Microscillaceae	D_5__Siphonobacter	0.154305	0	0	0	0	0	0	0	0
D_0__Bacteria	D_1__Elusimicrobia	D_2__Elusimicrobia	D_3__Lineage IV	Ambiguous_taxa	Ambiguous_taxa	0.147291	0	0	0	0	0	0	0	0
D_0__Bacteria	D_1__Spirochaetes	D_2__Leptospirae	D_3__Leptospirales	D_4__Leptospiraceae	D_5__Turneriella	0.129756	0	0	0	0	0	0	0	0
D_0__Bacteria	D_1__Chloroflexi	D_2__Dehalococcoidia	Other	Other	Other	0.122742	0	0	0	0	0	0	0	0
D_0__Bacteria	D_1__Proteobacteria	D_2__Deltaproteobacteria	D_3__MBNT15	Ambiguous_taxa	Ambiguous_taxa	0.122742	0	0	0	0	0	0	0	0
D_0__Archaea	D_1__Euryarchaeota	D_2__Methanomicrobia	D_3__Methanosarcinales	D_4__Methanoperedenaceae	Other	0.112222	0	0	0	0	0	0	0	0
D_0__Bacteria	D_1__Actinobacteria	D_2__Rubrobacteria	D_3__Rubrobacterales	D_4__Rubrobacteriaceae	D_5__Rubrobacter	0.101701	0	0	0	0	0	0	0	0
D_0__Bacteria	D_1__Bacteroidetes	D_2__Bacteroidia	D_3__Chitinophagales	D_4__Chitinophagaceae	D_5__Parasegetibacter	0.101701	0	0	0	0	0	0	0	0
D_0__Bacteria	D_1__Latescibacteria	Other	Other	Other	Other	0.101701	0	0	0	0	0	0	0	0
D_0__Bacteria	D_1__Armatimonadetes	Other	Other	Other	Other	0.0876732	0	0	0	0	0	0	0	0
D_0__Bacteria	D_1__GAL15	D_2__uncultured bacterium	D_3__uncultured bacterium	D_4__uncultured bacterium	D_5__uncultured bacterium	0.0841662	0	0	0	0	0	0	0	0
D_0__Bacteria	D_1__Proteobacteria	D_2__Alphaproteobacteria	D_3__Rhodobacterales	D_4__Rhodobacteraceae	D_5__Rubellimicrobium	0.0841662	0	0	0	0	0	0	0	0
D_0__Bacteria	D_1__Bacteroidetes	D_2__Bacteroidia	D_3__Cytophagales	D_4__Spirosomaceae	D_5__Spirosoma	0.0806593	0	0	0	0	0	0	0	0
D_0__Bacteria	D_1__Firmicutes	D_2__Clostridia	D_3__Clostridiales	D_4__Clostridiaceae 1	D_5__Clostridium sensu stricto 3	0.0806593	0	0	0	0	0	0	0	0
D_0__Bacteria	D_1__Proteobacteria	D_2__Deltaproteobacteria	D_3__Syntrophobacterales	D_4__Syntrophaceae	Other	0.0806593	0	0	0	0	0	0	0	0
D_0__Bacteria	D_1__Actinobacteria	D_2__Actinobacteria	Other	Other	Other	0.0771524	0	0	0	0	0	0	0	0
D_0__Bacteria	D_1__Armatimonadetes	D_2__Fimbriimonadia	D_3__Fimbriimonadales	D_4__uncultured bacterium	D_5__uncultured bacterium	0.0771524	0	0	0	0	0	0	0	0
D_0__Bacteria	D_1__Acidobacteria	D_2__Aminicenantia	D_3__Aminicenantales	D_4__uncultured bacterium	D_5__uncultured bacterium	0.0701385	0	0	0	0	0	0	0	0
D_0__Bacteria	D_1__Proteobacteria	D_2__Deltaproteobacteria	D_3__Sva0485	D_4__uncultured delta proteobacterium	D_5__uncultured delta proteobacterium	0.0666316	0	0	0	0	0	0	0	0
D_0__Archaea	D_1__Nanoarchaeaeota	D_2__Nanohaloarchaeia	D_3__Aenigmarchaeales	D_4__uncultured archaeon	D_5__uncultured archaeon	0.0596177	0	0	0	0	0	0	0	0
D_0__Bacteria	D_1__Acidobacteria	D_2__Blastocatellia (Subgroup 4)	D_3__Blastocatellales	D_4__Blastocatellaceae	D_5__Blastocatella	0.0561108	0	0	0	0	0	0	0	0
D_0__Bacteria	D_1__Actinobacteria	D_2__Coriobacteriia	D_3__CG2-30-50-142	D_4__uncultured actinobacterium	D_5__uncultured actinobacterium	0.0526039	0	0	0	0	0	0	0	0
D_0__Bacteria	D_1__Actinobacteria	D_2__Thermoleophilia	D_3__Solirubrobacterales	D_4__Solirubrobacteraceae	D_5__Patulibacter	0.0526039	0	0	0	0	0	0	0	0
D_0__Bacteria	D_1__Nitrospinae	D_2__MT5B39	Other	Other	Other	0.0526039	0	0	0	0	0	0	0	0
D_0__Archaea	D_1__Altiarchaeota	D_2__Altiarchaeia	Other	Other	Other	0.049097	0	0	0	0	0	0	0	0
D_0__Bacteria	D_1__Proteobacteria	D_2__Alphaproteobacteria	D_3__Rhizobiales	D_4__Rhizobiaceae	D_5__Aureimonas	0.049097	0	0	0	0	0	0	0	0
D_0__Bacteria	D_1__Bacteroidetes	D_2__Ignavibacteria	D_3__Kryptoniales	D_4__BSV26	D_5__uncultured bacterium	0.04559	0	0	0	0	0	0	0	0
D_0__Bacteria	D_1__Chloroflexi	D_2__Dehalococcoidia	D_3__SAR202 clade	D_4__uncultured gamma proteobacterium	D_5__uncultured gamma proteobacterium	0.04559	0	0	0	0	0	0	0	0
D_0__Bacteria	D_1__Patescibacteria	D_2__ABY1	D_3__Candidatus Kuenenbacteria	D_4__Parcubacteria bacterium SCGC AAA011-N16	D_5__Parcubacteria bacterium SCGC AAA011-N16	0.04559	0	0	0	0	0	0	0	0
D_0__Bacteria	D_1__Proteobacteria	D_2__Alphaproteobacteria	D_3__Acetobacterales	D_4__Acetobacteraceae	Other	0.04559	0	0	0	0	0	0	0	0
D_0__Bacteria	D_1__Actinobacteria	D_2__Thermoleophilia	D_3__Gaiellales	Other	Other	0.0420831	0	0	0	0	0	0	0	0
D_0__Bacteria	D_1__Bacteroidetes	D_2__Ignavibacteria	D_3__Ignavibacteriales	D_4__SM1H02	D_5__uncultured bacterium	0.0420831	0	0	0	0	0	0	0	0
D_0__Bacteria	D_1__Bacteroidetes	D_2__Bacteroidia	D_3__Chitinophagales	D_4__Saprospiraceae	D_5__uncultured	0.0385762	0	0	0	0	0	0	0	0
D_0__Bacteria	D_1__Cyanobacteria	D_2__Oxyphotobacteria	D_3__Nostocales	D_4__Chroococcidiopsaceae	D_5__Chroococcidiopsis PCC 7203	0.0385762	0	0	0	0	0	0	0	0
D_0__Bacteria	D_1__Nitrospirae	D_2__BMS9AB35	Ambiguous_taxa	Ambiguous_taxa	Ambiguous_taxa	0.0385762	0	0	0	0	0	0	0	0
D_0__Bacteria	D_1__Proteobacteria	D_2__Deltaproteobacteria	D_3__Bdellovibrionales	D_4__Bdellovibrionaceae	D_5__Bdellovibrio	0.0385762	0	0	0	0	0	0	0	0
D_0__Bacteria	D_1__Deinococcus-Thermus	D_2__Deinococci	D_3__Deinococcales	D_4__Trueperaceae	D_5__Truepera	0.0350693	0	0	0	0	0	0	0	0
D_0__Bacteria	D_1__Patescibacteria	Other	Other	Other	Other	0.0350693	0	0	0	0	0	0	0	0
D_0__Bacteria	D_1__Proteobacteria	D_2__Gammaproteobacteria	D_3__Diplorickettsiales	D_4__Diplorickettsiaceae	D_5__Aquicella	0.0350693	0	0	0	0	0	0	0	0
D_0__Bacteria	D_1__Latescibacteria	D_2__uncultured Latescibacteria bacterium	D_3__uncultured Latescibacteria bacterium	D_4__uncultured Latescibacteria bacterium	D_5__uncultured Latescibacteria bacterium	0.0315623	0	0	0	0	0	0	0	0
D_0__Archaea	D_1__Thaumarchaeota	Other	Other	Other	Other	0.0280554	0	0	0	0	0	0	0	0
D_0__Bacteria	D_1__Actinobacteria	D_2__Coriobacteriia	D_3__FS118-23B-02	D_4__uncultured bacterium	D_5__uncultured bacterium	0.0280554	0	0	0	0	0	0	0	0
D_0__Bacteria	D_1__Actinobacteria	D_2__Coriobacteriia	Other	Other	Other	0.0280554	0	0	0	0	0	0	0	0
D_0__Bacteria	D_1__Bacteroidetes	D_2__Bacteroidia	D_3__Chitinophagales	D_4__Chitinophagaceae	D_5__Terrimonas	0.0280554	0	0	0	0	0	0	0	0
D_0__Bacteria	D_1__Bacteroidetes	D_2__Bacteroidia	D_3__Sphingobacteriales	D_4__AKYH767	Other	0.0280554	0	0	0	0	0	0	0	0
D_0__Bacteria	D_1__Chloroflexi	D_2__Dehalococcoidia	D_3__MSBL5	D_4__uncultured bacterium	D_5__uncultured bacterium	0.0280554	0	0	0	0	0	0	0	0
D_0__Bacteria	D_1__Latescibacteria	D_2__uncultured proteobacterium	D_3__uncultured proteobacterium	D_4__uncultured proteobacterium	D_5__uncultured proteobacterium	0.0280554	0	0	0	0	0	0	0	0
D_0__Bacteria	D_1__Patescibacteria	D_2__ABY1	Other	Other	Other	0.0280554	0	0	0	0	0	0	0	0
D_0__Bacteria	D_1__Planctomycetes	D_2__Pla4 lineage	D_3__uncultured bacterium	D_4__uncultured bacterium	D_5__uncultured bacterium	0.0280554	0	0	0	0	0	0	0	0
D_0__Bacteria	D_1__Acidobacteria	D_2__Blastocatellia (Subgroup 4)	D_3__Blastocatellales	D_4__Blastocatellaceae	Other	0.0245485	0	0	0	0	0	0	0	0
D_0__Bacteria	D_1__Chloroflexi	D_2__Anaerolineae	D_3__RBG-13-54-9	Other	Other	0.0245485	0	0	0	0	0	0	0	0
D_0__Bacteria	D_1__PAUC34f	Other	Other	Other	Other	0.0245485	0	0	0	0	0	0	0	0
D_0__Bacteria	D_1__Planctomycetes	D_2__Phycisphaerae	D_3__MSBL9	D_4__SG8-4	Other	0.0245485	0	0	0	0	0	0	0	0
D_0__Bacteria	D_1__Planctomycetes	D_2__Pla4 lineage	Other	Other	Other	0.0245485	0	0	0	0	0	0	0	0
D_0__Bacteria	D_1__Planctomycetes	D_2__Planctomycetacia	D_3__Planctomycetales	Other	Other	0.0245485	0	0	0	0	0	0	0	0
D_0__Bacteria	D_1__Acidobacteria	D_2__Thermoanaerobaculia	D_3__Thermoanaerobaculales	D_4__Thermoanaerobaculaceae	D_5__Thermoanaerobaculum	0.0210416	0	0	0	0	0	0	0	0
D_0__Bacteria	D_1__Bacteroidetes	D_2__Bacteroidia	D_3__Bacteroidales	Other	Other	0.0210416	0	0	0	0	0	0	0	0
D_0__Bacteria	D_1__Bacteroidetes	D_2__Rhodothermia	D_3__Rhodothermales	D_4__Rhodothermaceae	D_5__Rubrivirga	0.0210416	0	0	0	0	0	0	0	0
D_0__Bacteria	D_1__Chloroflexi	D_2__Anaerolineae	D_3__Thermoflexales	D_4__Thermoflexaceae	D_5__Thermoflexus	0.0210416	0	0	0	0	0	0	0	0
D_0__Bacteria	D_1__Chloroflexi	D_2__Dehalococcoidia	D_3__GIF9	D_4__uncultured bacterium	D_5__uncultured bacterium	0.0210416	0	0	0	0	0	0	0	0
D_0__Bacteria	D_1__Chloroflexi	D_2__Dehalococcoidia	D_3__GIF9	Other	Other	0.0210416	0	0	0	0	0	0	0	0
D_0__Bacteria	D_1__Chloroflexi	D_2__SHA-26	D_3__uncultured Chloroflexi bacterium	D_4__uncultured Chloroflexi bacterium	D_5__uncultured Chloroflexi bacterium	0.0210416	0	0	0	0	0	0	0	0
D_0__Bacteria	D_1__Kiritimatiellaeota	D_2__Kiritimatiellae	D_3__WCHB1-41	Other	Other	0.0210416	0	0	0	0	0	0	0	0
D_0__Bacteria	D_1__Lentisphaerae	D_2__Lentisphaeria	D_3__Victivallales	Other	Other	0.0210416	0	0	0	0	0	0	0	0
D_0__Bacteria	D_1__Patescibacteria	D_2__Parcubacteria	D_3__Candidatus Kaiserbacteria	Other	Other	0.0210416	0	0	0	0	0	0	0	0
D_0__Bacteria	D_1__Proteobacteria	D_2__Deltaproteobacteria	D_3__Desulfobacterales	D_4__Desulfobulbaceae	D_5__MSBL7	0.0210416	0	0	0	0	0	0	0	0
D_0__Bacteria	D_1__Proteobacteria	D_2__Deltaproteobacteria	D_3__Myxococcales	D_4__P3OB-42	Other	0.0210416	0	0	0	0	0	0	0	0
D_0__Bacteria	D_1__Proteobacteria	D_2__Gammaproteobacteria	D_3__Legionellales	D_4__Legionellaceae	D_5__Legionella	0.0210416	0	0	0	0	0	0	0	0
D_0__Bacteria	D_1__Proteobacteria	D_2__Gammaproteobacteria	D_3__Salinisphaerales	D_4__Solimonadaceae	D_5__Panacagrimonas	0.0210416	0	0	0	0	0	0	0	0
D_0__Bacteria	D_1__Proteobacteria	D_2__Gammaproteobacteria	D_3__Xanthomonadales	D_4__Xanthomonadaceae	D_5__Stenotrophomonas	0.0210416	0	0	0	0	0	0	0	0
D_0__Bacteria	D_1__Rokubacteria	D_2__NC10	D_3__Methylomirabilales	D_4__Methylomirabilaceae	Other	0.0210416	0	0	0	0	0	0	0	0
D_0__Archaea	D_1__Nanoarchaeaeota	Other	Other	Other	Other	0.0175346	0	0	0	0	0	0	0	0
D_0__Bacteria	D_1__Acidobacteria	D_2__Subgroup 17	Other	Other	Other	0.0175346	0	0	0	0	0	0	0	0
D_0__Bacteria	D_1__Actinobacteria	D_2__Actinobacteria	D_3__Micrococcales	D_4__Micrococcaceae	D_5__Glutamicibacter	0.0175346	0	0	0	0	0	0	0	0
D_0__Bacteria	D_1__Bacteroidetes	D_2__Ignavibacteria	D_3__OPB56	Other	Other	0.0175346	0	0	0	0	0	0	0	0
D_0__Bacteria	D_1__Chloroflexi	D_2__Chloroflexia	D_3__Thermomicrobiales	D_4__JG30-KF-CM45	Other	0.0175346	0	0	0	0	0	0	0	0
D_0__Bacteria	D_1__Cyanobacteria	D_2__Oxyphotobacteria	D_3__Nostocales	D_4__Microcystaceae	D_5__Pleurocapsa PCC-7327	0.0175346	0	0	0	0	0	0	0	0
D_0__Bacteria	D_1__Elusimicrobia	D_2__Elusimicrobia	D_3__FCPU453	Other	Other	0.0175346	0	0	0	0	0	0	0	0
D_0__Bacteria	D_1__Nitrospirae	D_2__Thermodesulfovibrionia	D_3__uncultured	D_4__uncultured bacterium	D_5__uncultured bacterium	0.0175346	0	0	0	0	0	0	0	0
D_0__Bacteria	D_1__Patescibacteria	D_2__Parcubacteria	D_3__Candidatus Moranbacteria	Other	Other	0.0175346	0	0	0	0	0	0	0	0
D_0__Bacteria	D_1__Proteobacteria	D_2__Deltaproteobacteria	D_3__MBNT15	Other	Other	0.0175346	0	0	0	0	0	0	0	0
D_0__Bacteria	D_1__Proteobacteria	D_2__Deltaproteobacteria	D_3__Myxococcales	D_4__Phaselicystidaceae	D_5__Phaselicystis	0.0175346	0	0	0	0	0	0	0	0
D_0__Bacteria	D_1__Proteobacteria	D_2__Deltaproteobacteria	D_3__Oligoflexales	D_4__Oligoflexaceae	D_5__uncultured	0.0175346	0	0	0	0	0	0	0	0
D_0__Bacteria	D_1__Proteobacteria	D_2__Gammaproteobacteria	D_3__Xanthomonadales	D_4__Xanthomonadaceae	D_5__Luteimonas	0.0175346	0	0	0	0	0	0	0	0
D_0__Archaea	D_1__Euryarchaeota	D_2__Methanomicrobia	D_3__Methanocellales	D_4__uncultured	Ambiguous_taxa	0.0140277	0	0	0	0	0	0	0	0
D_0__Archaea	D_1__Thaumarchaeota	D_2__Marine Benthic Group A	D_3__uncultured archaeon	D_4__uncultured archaeon	D_5__uncultured archaeon	0.0140277	0	0	0	0	0	0	0	0
D_0__Bacteria	D_1__Acidobacteria	D_2__Thermoanaerobaculia	D_3__Thermoanaerobaculales	D_4__Thermoanaerobaculaceae	D_5__Subgroup 10	0.0140277	0	0	0	0	0	0	0	0
D_0__Bacteria	D_1__Actinobacteria	D_2__Actinobacteria	D_3__Kineosporiales	D_4__Kineosporiaceae	D_5__Quadrisphaera	0.0140277	0	0	0	0	0	0	0	0
D_0__Bacteria	D_1__Actinobacteria	D_2__MB-A2-108	Ambiguous_taxa	Ambiguous_taxa	Ambiguous_taxa	0.0140277	0	0	0	0	0	0	0	0
D_0__Bacteria	D_1__Actinobacteria	D_2__MB-A2-108	Other	Other	Other	0.0140277	0	0	0	0	0	0	0	0
D_0__Bacteria	D_1__Actinobacteria	D_2__Thermoleophilia	D_3__Solirubrobacterales	D_4__67-14	Ambiguous_taxa	0.0140277	0	0	0	0	0	0	0	0
D_0__Bacteria	D_1__Chloroflexi	D_2__Dehalococcoidia	D_3__Sh765B-AG-111	Other	Other	0.0140277	0	0	0	0	0	0	0	0
D_0__Bacteria	D_1__Chloroflexi	D_2__JG30-KF-CM66	D_3__uncultured bacterium	D_4__uncultured bacterium	D_5__uncultured bacterium	0.0140277	0	0	0	0	0	0	0	0
D_0__Bacteria	D_1__Dadabacteria	D_2__Dadabacteriia	D_3__Dadabacteriales	D_4__uncultured bacterium	D_5__uncultured bacterium	0.0140277	0	0	0	0	0	0	0	0
D_0__Bacteria	D_1__Dependentiae	D_2__Babeliae	D_3__Babeliales	Other	Other	0.0140277	0	0	0	0	0	0	0	0
D_0__Bacteria	D_1__Omnitrophicaeota	D_2__Omnitrophia	D_3__Omnitrophales	D_4__Omnitrophaceae	D_5__Candidatus Omnitrophus	0.0140277	0	0	0	0	0	0	0	0
D_0__Bacteria	D_1__Planctomycetes	D_2__Phycisphaerae	D_3__MSBL9	D_4__SG8-4	D_5__uncultured bacterium	0.0140277	0	0	0	0	0	0	0	0
D_0__Bacteria	D_1__Planctomycetes	D_2__Planctomycetacia	D_3__Gemmatales	D_4__Gemmataceae	D_5__Fimbriiglobus	0.0140277	0	0	0	0	0	0	0	0
D_0__Bacteria	D_1__Proteobacteria	D_2__Alphaproteobacteria	D_3__Paracaedibacterales	D_4__Paracaedibacteraceae	D_5__uncultured	0.0140277	0	0	0	0	0	0	0	0
D_0__Bacteria	D_1__Proteobacteria	D_2__Alphaproteobacteria	D_3__Rhizobiales	D_4__Hyphomicrobiaceae	D_5__Pedomicrobium	0.0140277	0	0	0	0	0	0	0	0
D_0__Bacteria	D_1__Proteobacteria	D_2__Deltaproteobacteria	D_3__Myxococcales	D_4__Blfdi19	D_5__Anaeromyxobacter dehalogenans	0.0140277	0	0	0	0	0	0	0	0
D_0__Bacteria	D_1__Proteobacteria	D_2__Deltaproteobacteria	D_3__Myxococcales	D_4__Polyangiaceae	D_5__Pajaroellobacter	0.0140277	0	0	0	0	0	0	0	0
D_0__Bacteria	D_1__Proteobacteria	D_2__Deltaproteobacteria	D_3__Myxococcales	D_4__UASB-TL25	D_5__uncultured Nannocystineae bacterium	0.0140277	0	0	0	0	0	0	0	0
D_0__Bacteria	D_1__Proteobacteria	D_2__Deltaproteobacteria	D_3__Myxococcales	D_4__UASB-TL25	D_5__uncultured bacterium	0.0140277	0	0	0	0	0	0	0	0
D_0__Bacteria	D_1__Proteobacteria	D_2__Deltaproteobacteria	D_3__Sva0485	D_4__uncultured Spirochaetales bacterium	D_5__uncultured Spirochaetales bacterium	0.0140277	0	0	0	0	0	0	0	0
D_0__Bacteria	D_1__Proteobacteria	D_2__Gammaproteobacteria	D_3__Betaproteobacteriales	D_4__Nitrosomonadaceae	D_5__Nitrosomonas	0.0140277	0	0	0	0	0	0	0	0
D_0__Bacteria	D_1__Proteobacteria	D_2__Gammaproteobacteria	D_3__CHAB-XI-27	D_4__uncultured bacterium	D_5__uncultured bacterium	0.0140277	0	0	0	0	0	0	0	0
D_0__Bacteria	D_1__Proteobacteria	D_2__Gammaproteobacteria	D_3__Xanthomonadales	D_4__Xanthomonadaceae	D_5__Lysobacter	0.0140277	0	0	0	0	0	0	0	0
D_0__Bacteria	D_1__Zixibacteria	D_2__candidate division Zixibacteria bacterium RBG_16_43_9	D_3__candidate division Zixibacteria bacterium RBG_16_43_9	D_4__candidate division Zixibacteria bacterium RBG_16_43_9	D_5__candidate division Zixibacteria bacterium RBG_16_43_9	0.0140277	0	0	0	0	0	0	0	0
D_0__Archaea	D_1__Euryarchaeota	D_2__Thermococci	D_3__Methanofastidiosales	D_4__uncultured	D_5__uncultured archaeon	0.0105208	0	0	0	0	0	0	0	0
D_0__Archaea	D_1__Hadesarchaeaeota	D_2__uncultured archaeon	D_3__uncultured archaeon	D_4__uncultured archaeon	D_5__uncultured archaeon	0.0105208	0	0	0	0	0	0	0	0
D_0__Bacteria	D_1__Acidobacteria	D_2__Acidobacteriia	D_3__Acidobacteriales	D_4__uncultured	Other	0.0105208	0	0	0	0	0	0	0	0
D_0__Bacteria	D_1__Acidobacteria	D_2__Aminicenantia	D_3__Aminicenantales	Other	Other	0.0105208	0	0	0	0	0	0	0	0
D_0__Bacteria	D_1__Acidobacteria	D_2__Holophagae	D_3__Holophagales	D_4__Holophagaceae	D_5__uncultured	0.0105208	0	0	0	0	0	0	0	0
D_0__Bacteria	D_1__Actinobacteria	D_2__Actinobacteria	D_3__Kineosporiales	D_4__Kineosporiaceae	Other	0.0105208	0	0	0	0	0	0	0	0
D_0__Bacteria	D_1__Actinobacteria	D_2__Coriobacteriia	D_3__OPB41	Ambiguous_taxa	Ambiguous_taxa	0.0105208	0	0	0	0	0	0	0	0
D_0__Bacteria	D_1__Chloroflexi	D_2__Anaerolineae	D_3__SJA-15	D_4__uncultured bacterium	D_5__uncultured bacterium	0.0105208	0	0	0	0	0	0	0	0
D_0__Bacteria	D_1__Chloroflexi	D_2__Dehalococcoidia	D_3__S085	Other	Other	0.0105208	0	0	0	0	0	0	0	0
D_0__Bacteria	D_1__Dependentiae	D_2__Babeliae	D_3__Babeliales	D_4__Babeliaceae	Other	0.0105208	0	0	0	0	0	0	0	0
D_0__Bacteria	D_1__Dependentiae	D_2__Babeliae	D_3__Babeliales	D_4__Vermiphilaceae	Other	0.0105208	0	0	0	0	0	0	0	0
D_0__Bacteria	D_1__Patescibacteria	D_2__Gracilibacteria	D_3__groundwater metagenome	D_4__groundwater metagenome	D_5__groundwater metagenome	0.0105208	0	0	0	0	0	0	0	0
D_0__Bacteria	D_1__Planctomycetes	D_2__Planctomycetacia	D_3__Gemmatales	D_4__Gemmataceae	D_5__Gemmata	0.0105208	0	0	0	0	0	0	0	0
D_0__Bacteria	D_1__Planctomycetes	D_2__Planctomycetacia	D_3__Gemmatales	D_4__Gemmataceae	D_5__uncultured	0.0105208	0	0	0	0	0	0	0	0
D_0__Bacteria	D_1__Proteobacteria	D_2__Alphaproteobacteria	D_3__Caulobacterales	D_4__Caulobacteraceae	D_5__PMMR1	0.0105208	0	0	0	0	0	0	0	0
D_0__Bacteria	D_1__Proteobacteria	D_2__Alphaproteobacteria	D_3__Rhizobiales	D_4__Beijerinckiaceae	D_5__Methylocystis	0.0105208	0	0	0	0	0	0	0	0
D_0__Bacteria	D_1__Proteobacteria	D_2__Alphaproteobacteria	D_3__Tistrellales	D_4__Geminicoccaceae	D_5__Candidatus Alysiosphaera	0.0105208	0	0	0	0	0	0	0	0
D_0__Bacteria	D_1__Proteobacteria	D_2__Deltaproteobacteria	D_3__Myxococcales	D_4__P3OB-42	D_5__uncultured delta proteobacterium	0.0105208	0	0	0	0	0	0	0	0
D_0__Bacteria	D_1__Proteobacteria	D_2__Deltaproteobacteria	D_3__Myxococcales	D_4__VHS-B3-70	Other	0.0105208	0	0	0	0	0	0	0	0
D_0__Bacteria	D_1__Proteobacteria	D_2__Deltaproteobacteria	D_3__Myxococcales	D_4__VHS-B4-70	Other	0.0105208	0	0	0	0	0	0	0	0
D_0__Bacteria	D_1__Proteobacteria	D_2__Deltaproteobacteria	D_3__Myxococcales	D_4__mle1-27	D_5__uncultured bacterium	0.0105208	0	0	0	0	0	0	0	0
D_0__Bacteria	D_1__Proteobacteria	D_2__Deltaproteobacteria	D_3__Myxococcales	D_4__mle1-27	Other	0.0105208	0	0	0	0	0	0	0	0
D_0__Bacteria	D_1__Proteobacteria	D_2__Deltaproteobacteria	D_3__Oligoflexales	D_4__0319-6G20	Other	0.0105208	0	0	0	0	0	0	0	0
D_0__Bacteria	D_1__Proteobacteria	D_2__Gammaproteobacteria	D_3__Betaproteobacteriales	D_4__Burkholderiaceae	D_5__Inhella	0.0105208	0	0	0	0	0	0	0	0
D_0__Bacteria	D_1__Proteobacteria	D_2__Gammaproteobacteria	D_3__Betaproteobacteriales	D_4__Burkholderiaceae	D_5__uncultured	0.0105208	0	0	0	0	0	0	0	0
D_0__Bacteria	D_1__Proteobacteria	D_2__Gammaproteobacteria	D_3__Betaproteobacteriales	D_4__TRA3-20	Other	0.0105208	0	0	0	0	0	0	0	0
D_0__Bacteria	D_1__Proteobacteria	D_2__Gammaproteobacteria	D_3__Methylococcales	D_4__Methylococcaceae	D_5__Methylogaea	0.0105208	0	0	0	0	0	0	0	0
D_0__Bacteria	D_1__Proteobacteria	D_2__Gammaproteobacteria	D_3__Salinisphaerales	D_4__Solimonadaceae	D_5__uncultured	0.0105208	0	0	0	0	0	0	0	0
D_0__Bacteria	D_1__Proteobacteria	D_2__Gammaproteobacteria	D_3__Tenderiales	D_4__Tenderiaceae	D_5__Candidatus Tenderia	0.0105208	0	0	0	0	0	0	0	0
D_0__Bacteria	D_1__Spirochaetes	D_2__Leptospirae	D_3__Leptospirales	D_4__Leptospiraceae	D_5__uncultured	0.0105208	0	0	0	0	0	0	0	0
D_0__Bacteria	D_1__WOR-1	D_2__uncultured bacterium	D_3__uncultured bacterium	D_4__uncultured bacterium	D_5__uncultured bacterium	0.0105208	0	0	0	0	0	0	0	0
D_0__Archaea	D_1__Euryarchaeota	D_2__Thermoplasmata	D_3__Marine Benthic Group D and DHVEG-1	Ambiguous_taxa	Ambiguous_taxa	0.00701385	0	0	0	0	0	0	0	0
D_0__Archaea	D_1__Euryarchaeota	D_2__Thermoplasmata	D_3__uncultured	Other	Other	0.00701385	0	0	0	0	0	0	0	0
D_0__Archaea	D_1__Euryarchaeota	D_2__Thermoplasmata	Other	Other	Other	0.00701385	0	0	0	0	0	0	0	0
D_0__Archaea	D_1__Thaumarchaeota	D_2__Marine Benthic Group A	Other	Other	Other	0.00701385	0	0	0	0	0	0	0	0
D_0__Bacteria	D_1__Acidobacteria	D_2__Subgroup 18	Other	Other	Other	0.00701385	0	0	0	0	0	0	0	0
D_0__Bacteria	D_1__Acidobacteria	D_2__Thermoanaerobaculia	D_3__Thermoanaerobaculales	D_4__Thermoanaerobaculaceae	D_5__Subgroup 23	0.00701385	0	0	0	0	0	0	0	0
D_0__Bacteria	D_1__Actinobacteria	D_2__Acidimicrobiia	D_3__Microtrichales	Other	Other	0.00701385	0	0	0	0	0	0	0	0
D_0__Bacteria	D_1__Actinobacteria	D_2__Actinobacteria	D_3__Corynebacteriales	D_4__Mycobacteriaceae	D_5__Mycobacterium	0.00701385	0	0	0	0	0	0	0	0
D_0__Bacteria	D_1__Actinobacteria	D_2__Actinobacteria	D_3__Frankiales	D_4__Geodermatophilaceae	D_5__Blastococcus	0.00701385	0	0	0	0	0	0	0	0
D_0__Bacteria	D_1__Actinobacteria	D_2__Actinobacteria	D_3__Pseudonocardiales	D_4__Pseudonocardiaceae	D_5__Pseudonocardia	0.00701385	0	0	0	0	0	0	0	0
D_0__Bacteria	D_1__Actinobacteria	D_2__Thermoleophilia	D_3__Solirubrobacterales	D_4__67-14	Other	0.00701385	0	0	0	0	0	0	0	0
D_0__Bacteria	D_1__Armatimonadetes	D_2__Fimbriimonadia	D_3__Fimbriimonadales	Other	Other	0.00701385	0	0	0	0	0	0	0	0
D_0__Bacteria	D_1__Bacteroidetes	D_2__Bacteroidia	D_3__Cytophagales	D_4__Cytophagaceae	D_5__Rhodocytophaga	0.00701385	0	0	0	0	0	0	0	0
D_0__Bacteria	D_1__Bacteroidetes	D_2__Bacteroidia	D_3__Cytophagales	D_4__Spirosomaceae	D_5__Dyadobacter	0.00701385	0	0	0	0	0	0	0	0
D_0__Bacteria	D_1__Chloroflexi	D_2__Anaerolineae	D_3__Ardenticatenales	D_4__uncultured	Other	0.00701385	0	0	0	0	0	0	0	0
D_0__Bacteria	D_1__Chloroflexi	D_2__Anaerolineae	D_3__MSB-5B2	Other	Other	0.00701385	0	0	0	0	0	0	0	0
D_0__Bacteria	D_1__Chloroflexi	D_2__Anaerolineae	D_3__uncultured	Other	Other	0.00701385	0	0	0	0	0	0	0	0
D_0__Bacteria	D_1__Cyanobacteria	D_2__Melainabacteria	D_3__Obscuribacterales	D_4__uncultured bacterium	D_5__uncultured bacterium	0.00701385	0	0	0	0	0	0	0	0
D_0__Bacteria	D_1__Cyanobacteria	D_2__Melainabacteria	D_3__Obscuribacterales	Other	Other	0.00701385	0	0	0	0	0	0	0	0
D_0__Bacteria	D_1__Cyanobacteria	D_2__Oxyphotobacteria	D_3__Oxyphotobacteria Incertae Sedis	D_4__Unknown Family	D_5__Leptolyngbya ANT.L52.2	0.00701385	0	0	0	0	0	0	0	0
D_0__Bacteria	D_1__Gemmatimonadetes	D_2__MD2902-B12	D_3__uncultured bacterium	D_4__uncultured bacterium	D_5__uncultured bacterium	0.00701385	0	0	0	0	0	0	0	0
D_0__Bacteria	D_1__Latescibacteria	D_2__uncultured Bacteroidetes bacterium	D_3__uncultured Bacteroidetes bacterium	D_4__uncultured Bacteroidetes bacterium	D_5__uncultured Bacteroidetes bacterium	0.00701385	0	0	0	0	0	0	0	0
D_0__Bacteria	D_1__Nitrospinae	D_2__MT5B39	D_3__uncultured proteobacterium	D_4__uncultured proteobacterium	D_5__uncultured proteobacterium	0.00701385	0	0	0	0	0	0	0	0
D_0__Bacteria	D_1__Omnitrophicaeota	D_2__Candidatus Omnitrophica bacterium 4484_70.1	D_3__Candidatus Omnitrophica bacterium 4484_70.1	D_4__Candidatus Omnitrophica bacterium 4484_70.1	D_5__Candidatus Omnitrophica bacterium 4484_70.1	0.00701385	0	0	0	0	0	0	0	0
D_0__Bacteria	D_1__Omnitrophicaeota	D_2__uncultured Latescibacteria bacterium	D_3__uncultured Latescibacteria bacterium	D_4__uncultured Latescibacteria bacterium	D_5__uncultured Latescibacteria bacterium	0.00701385	0	0	0	0	0	0	0	0
D_0__Bacteria	D_1__Patescibacteria	D_2__Parcubacteria	D_3__Candidatus Nomurabacteria	D_4__Candidatus Nomurabacteria bacterium GW2011_GWA2_42_41	D_5__Candidatus Nomurabacteria bacterium GW2011_GWA2_42_41	0.00701385	0	0	0	0	0	0	0	0
D_0__Bacteria	D_1__Planctomycetes	D_2__Brocadiae	D_3__Brocadiales	D_4__Brocadiaceae	Other	0.00701385	0	0	0	0	0	0	0	0
D_0__Bacteria	D_1__Planctomycetes	D_2__Phycisphaerae	D_3__Tepidisphaerales	D_4__Tepidisphaeraceae	D_5__uncultured bacterium	0.00701385	0	0	0	0	0	0	0	0
D_0__Bacteria	D_1__Planctomycetes	D_2__Phycisphaerae	D_3__mle1-8	D_4__uncultured bacterium	D_5__uncultured bacterium	0.00701385	0	0	0	0	0	0	0	0
D_0__Bacteria	D_1__Planctomycetes	D_2__Pla4 lineage	D_3__uncultured Planctomycetaceae bacterium	D_4__uncultured Planctomycetaceae bacterium	D_5__uncultured Planctomycetaceae bacterium	0.00701385	0	0	0	0	0	0	0	0
D_0__Bacteria	D_1__Planctomycetes	D_2__Planctomycetacia	D_3__Pirellulales	D_4__Pirellulaceae	D_5__Pirellula	0.00701385	0	0	0	0	0	0	0	0
D_0__Bacteria	D_1__Poribacteria	D_2__uncultured Firmicutes bacterium	D_3__uncultured Firmicutes bacterium	D_4__uncultured Firmicutes bacterium	D_5__uncultured Firmicutes bacterium	0.00701385	0	0	0	0	0	0	0	0
D_0__Bacteria	D_1__Proteobacteria	D_2__Alphaproteobacteria	D_3__Paracaedibacterales	D_4__Paracaedibacteraceae	D_5__Candidatus Paracaedibacter	0.00701385	0	0	0	0	0	0	0	0
D_0__Bacteria	D_1__Proteobacteria	D_2__Alphaproteobacteria	D_3__Rhodospirillales	D_4__uncultured	Other	0.00701385	0	0	0	0	0	0	0	0
D_0__Bacteria	D_1__Proteobacteria	D_2__Alphaproteobacteria	D_3__Sphingomonadales	D_4__Sphingomonadaceae	D_5__Altererythrobacter	0.00701385	0	0	0	0	0	0	0	0
D_0__Bacteria	D_1__Proteobacteria	D_2__Deltaproteobacteria	D_3__Myxococcales	D_4__P3OB-42	D_5__uncultured Myxococcales bacterium	0.00701385	0	0	0	0	0	0	0	0
D_0__Bacteria	D_1__Proteobacteria	D_2__Deltaproteobacteria	D_3__Myxococcales	D_4__VHS-B3-70	D_5__uncultured delta proteobacterium	0.00701385	0	0	0	0	0	0	0	0
D_0__Bacteria	D_1__Proteobacteria	D_2__Deltaproteobacteria	D_3__NKB15	D_4__uncultured bacterium	D_5__uncultured bacterium	0.00701385	0	0	0	0	0	0	0	0
D_0__Bacteria	D_1__Proteobacteria	D_2__Deltaproteobacteria	D_3__Oligoflexales	D_4__0319-6G20	D_5__uncultured bacterium	0.00701385	0	0	0	0	0	0	0	0
D_0__Bacteria	D_1__Proteobacteria	D_2__Deltaproteobacteria	D_3__Syntrophobacterales	D_4__Syntrophaceae	D_5__Desulfobacca	0.00701385	0	0	0	0	0	0	0	0
D_0__Bacteria	D_1__Proteobacteria	D_2__Gammaproteobacteria	D_3__Acidiferrobacterales	D_4__Acidiferrobacteraceae	D_5__Sulfurifustis	0.00701385	0	0	0	0	0	0	0	0
D_0__Bacteria	D_1__Proteobacteria	D_2__Gammaproteobacteria	D_3__Betaproteobacteriales	D_4__Hydrogenophilaceae	D_5__uncultured	0.00701385	0	0	0	0	0	0	0	0
D_0__Bacteria	D_1__Rokubacteria	D_2__NC10	D_3__Rokubacteriales	D_4__uncultured bacterium	D_5__uncultured bacterium	0.00701385	0	0	0	0	0	0	0	0
D_0__Bacteria	D_1__Schekmanbacteria	D_2__Candidatus Schekmanbacteria bacterium RIFCSPLOWO2_02_FULL_38_14	D_3__Candidatus Schekmanbacteria bacterium RIFCSPLOWO2_02_FULL_38_14	D_4__Candidatus Schekmanbacteria bacterium RIFCSPLOWO2_02_FULL_38_14	D_5__Candidatus Schekmanbacteria bacterium RIFCSPLOWO2_02_FULL_38_14	0.00701385	0	0	0	0	0	0	0	0
D_0__Bacteria	D_1__Spirochaetes	D_2__Leptospirae	D_3__Leptospirales	D_4__Leptospiraceae	D_5__RBG-16-49-21	0.00701385	0	0	0	0	0	0	0	0
D_0__Bacteria	D_1__Zixibacteria	D_2__uncultured soil bacterium	D_3__uncultured soil bacterium	D_4__uncultured soil bacterium	D_5__uncultured soil bacterium	0.00701385	0	0	0	0	0	0	0	0
D_0__Bacteria	D_1__Zixibacteria	Other	Other	Other	Other	0.00701385	0	0	0	0	0	0	0	0
D_0__Archaea	D_1__Crenarchaeota	D_2__Bathyarchaeia	D_3__uncultured archaeon	D_4__uncultured archaeon	D_5__uncultured archaeon	0.00350693	0	0	0	0	0	0	0	0
D_0__Archaea	D_1__Euryarchaeota	D_2__Methanomicrobia	D_3__Methanocellales	D_4__Methanocellaceae	D_5__Rice Cluster I	0.00350693	0	0	0	0	0	0	0	0
D_0__Archaea	D_1__Euryarchaeota	D_2__Thermoplasmata	D_3__Marine Group II	Other	Other	0.00350693	0	0	0	0	0	0	0	0
D_0__Archaea	D_1__Hydrothermarchaeota	D_2__uncultured archaeon	D_3__uncultured archaeon	D_4__uncultured archaeon	D_5__uncultured archaeon	0.00350693	0	0	0	0	0	0	0	0
D_0__Archaea	D_1__Nanoarchaeaeota	D_2__Woesearchaeia	Ambiguous_taxa	Ambiguous_taxa	Ambiguous_taxa	0.00350693	0	0	0	0	0	0	0	0
D_0__Archaea	D_1__Nanoarchaeaeota	D_2__Woesearchaeia	D_3__uncultured archaeon	D_4__uncultured archaeon	D_5__uncultured archaeon	0.00350693	0	0	0	0	0	0	0	0
D_0__Archaea	D_1__Thaumarchaeota	D_2__SCGC AB-179-E04	D_3__uncultured archaeon	D_4__uncultured archaeon	D_5__uncultured archaeon	0.00350693	0	0	0	0	0	0	0	0
D_0__Bacteria	D_1__Acetothermia	D_2__Acetothermiia	Other	Other	Other	0.00350693	0	0	0	0	0	0	0	0
D_0__Bacteria	D_1__Acidobacteria	D_2__Acidobacteriia	D_3__Solibacterales	D_4__Solibacteraceae (Subgroup 3)	D_5__AKIW659	0.00350693	0	0	0	0	0	0	0	0
D_0__Bacteria	D_1__Acidobacteria	D_2__Subgroup 6	D_3__Unknown Order	D_4__Unknown Family	Other	0.00350693	0	0	0	0	0	0	0	0
D_0__Bacteria	D_1__Acidobacteria	D_2__Thermoanaerobaculia	D_3__Thermoanaerobaculales	D_4__Thermoanaerobaculaceae	D_5__TPD-58	0.00350693	0	0	0	0	0	0	0	0
D_0__Bacteria	D_1__Actinobacteria	D_2__Acidimicrobiia	D_3__Microtrichales	D_4__Ilumatobacteraceae	Other	0.00350693	0	0	0	0	0	0	0	0
D_0__Bacteria	D_1__Actinobacteria	D_2__Acidimicrobiia	D_3__Microtrichales	D_4__uncultured	D_5__uncultured Acidimicrobidae bacterium	0.00350693	0	0	0	0	0	0	0	0
D_0__Bacteria	D_1__Actinobacteria	D_2__Actinobacteria	D_3__Frankiales	D_4__uncultured	Ambiguous_taxa	0.00350693	0	0	0	0	0	0	0	0
D_0__Bacteria	D_1__Actinobacteria	D_2__Actinobacteria	D_3__Micrococcales	D_4__Intrasporangiaceae	D_5__Knoellia	0.00350693	0	0	0	0	0	0	0	0
D_0__Bacteria	D_1__Actinobacteria	D_2__Actinobacteria	D_3__Propionibacteriales	D_4__Nocardioidaceae	D_5__Marmoricola	0.00350693	0	0	0	0	0	0	0	0
D_0__Bacteria	D_1__Actinobacteria	D_2__Actinobacteria	D_3__Propionibacteriales	Other	Other	0.00350693	0	0	0	0	0	0	0	0
D_0__Bacteria	D_1__Actinobacteria	D_2__Actinobacteria	D_3__Pseudonocardiales	D_4__Pseudonocardiaceae	D_5__Actinomycetospora	0.00350693	0	0	0	0	0	0	0	0
D_0__Bacteria	D_1__Actinobacteria	D_2__Coriobacteriia	D_3__FS118-23B-02	Other	Other	0.00350693	0	0	0	0	0	0	0	0
D_0__Bacteria	D_1__Actinobacteria	D_2__KIST-JJY010	D_3__uncultured bacterium	D_4__uncultured bacterium	D_5__uncultured bacterium	0.00350693	0	0	0	0	0	0	0	0
D_0__Bacteria	D_1__Actinobacteria	D_2__RBG-16-55-12	D_3__uncultured actinobacterium	D_4__uncultured actinobacterium	D_5__uncultured actinobacterium	0.00350693	0	0	0	0	0	0	0	0
D_0__Bacteria	D_1__Actinobacteria	D_2__Thermoleophilia	D_3__Gaiellales	D_4__uncultured	D_5__uncultured bacterium	0.00350693	0	0	0	0	0	0	0	0
D_0__Bacteria	D_1__Armatimonadetes	D_2__uncultured	D_3__uncultured bacterium SJA-121	D_4__uncultured bacterium SJA-121	D_5__uncultured bacterium SJA-121	0.00350693	0	0	0	0	0	0	0	0
D_0__Bacteria	D_1__BRC1	Other	Other	Other	Other	0.00350693	0	0	0	0	0	0	0	0
D_0__Bacteria	D_1__Bacteroidetes	D_2__Bacteroidia	D_3__Cytophagales	D_4__Cytophagaceae	D_5__Sporocytophaga	0.00350693	0	0	0	0	0	0	0	0
D_0__Bacteria	D_1__Bacteroidetes	D_2__Bacteroidia	D_3__Cytophagales	D_4__Microscillaceae	Other	0.00350693	0	0	0	0	0	0	0	0
D_0__Bacteria	D_1__Bacteroidetes	D_2__Bacteroidia	D_3__Flavobacteriales	D_4__Crocinitomicaceae	D_5__uncultured	0.00350693	0	0	0	0	0	0	0	0
D_0__Bacteria	D_1__Bacteroidetes	D_2__Ignavibacteria	D_3__Ignavibacteriales	D_4__LD-RB-34	D_5__uncultured bacterium	0.00350693	0	0	0	0	0	0	0	0
D_0__Bacteria	D_1__Bacteroidetes	D_2__Ignavibacteria	D_3__Ignavibacteriales	D_4__LD-RB-34	Other	0.00350693	0	0	0	0	0	0	0	0
D_0__Bacteria	D_1__Chlamydiae	D_2__Chlamydiae	D_3__Chlamydiales	D_4__cvE6	D_5__uncultured bacterium	0.00350693	0	0	0	0	0	0	0	0
D_0__Bacteria	D_1__Chlamydiae	D_2__Chlamydiae	D_3__Chlamydiales	Other	Other	0.00350693	0	0	0	0	0	0	0	0
D_0__Bacteria	D_1__Chloroflexi	D_2__Anaerolineae	D_3__SJA-15	Other	Other	0.00350693	0	0	0	0	0	0	0	0
D_0__Bacteria	D_1__Chloroflexi	D_2__Chloroflexia	D_3__Thermomicrobiales	D_4__JG30-KF-CM45	D_5__uncultured bacterium	0.00350693	0	0	0	0	0	0	0	0
D_0__Bacteria	D_1__Chloroflexi	D_2__Dehalococcoidia	D_3__SAR202 clade	Other	Other	0.00350693	0	0	0	0	0	0	0	0
D_0__Bacteria	D_1__Chloroflexi	D_2__Dehalococcoidia	D_3__Sh765B-AG-111	D_4__uncultured bacterium	D_5__uncultured bacterium	0.00350693	0	0	0	0	0	0	0	0
D_0__Bacteria	D_1__Chloroflexi	D_2__KD4-96	Other	Other	Other	0.00350693	0	0	0	0	0	0	0	0
D_0__Bacteria	D_1__Chloroflexi	D_2__Ktedonobacteria	D_3__Ktedonobacterales	D_4__Ktedonobacteraceae	Other	0.00350693	0	0	0	0	0	0	0	0
D_0__Bacteria	D_1__Chloroflexi	D_2__SHA-26	D_3__uncultured bacterium	D_4__uncultured bacterium	D_5__uncultured bacterium	0.00350693	0	0	0	0	0	0	0	0
D_0__Bacteria	D_1__Dependentiae	D_2__Babeliae	D_3__Babeliales	D_4__UBA12409	D_5__uncultured bacterium	0.00350693	0	0	0	0	0	0	0	0
D_0__Bacteria	D_1__Fibrobacteres	D_2__Fibrobacteria	D_3__Fibrobacterales	D_4__B5-096	D_5__uncultured bacterium	0.00350693	0	0	0	0	0	0	0	0
D_0__Bacteria	D_1__Firmicutes	D_2__Bacilli	D_3__Bacillales	D_4__Sporolactobacillaceae	Other	0.00350693	0	0	0	0	0	0	0	0
D_0__Bacteria	D_1__Firmicutes	D_2__Clostridia	D_3__Clostridiales	D_4__Clostridiaceae 1	D_5__Clostridium sensu stricto 8	0.00350693	0	0	0	0	0	0	0	0
D_0__Bacteria	D_1__Firmicutes	D_2__Clostridia	D_3__Clostridiales	D_4__Lachnospiraceae	D_5__[Ruminococcus] gauvreauii group	0.00350693	0	0	0	0	0	0	0	0
D_0__Bacteria	D_1__GAL15	Other	Other	Other	Other	0.00350693	0	0	0	0	0	0	0	0
D_0__Bacteria	D_1__Gemmatimonadetes	D_2__Gemmatimonadetes	D_3__Gemmatimonadales	D_4__Gemmatimonadaceae	D_5__Gemmatimonas	0.00350693	0	0	0	0	0	0	0	0
D_0__Bacteria	D_1__Latescibacteria	D_2__uncultured soil bacterium	D_3__uncultured soil bacterium	D_4__uncultured soil bacterium	D_5__uncultured soil bacterium	0.00350693	0	0	0	0	0	0	0	0
D_0__Bacteria	D_1__Nitrospinae	D_2__P9X2b3D02	Other	Other	Other	0.00350693	0	0	0	0	0	0	0	0
D_0__Bacteria	D_1__Patescibacteria	D_2__Berkelbacteria	D_3__Berkelbacteria bacterium GW2011_GWA2_38_9	D_4__Berkelbacteria bacterium GW2011_GWA2_38_9	D_5__Berkelbacteria bacterium GW2011_GWA2_38_9	0.00350693	0	0	0	0	0	0	0	0
D_0__Bacteria	D_1__Patescibacteria	D_2__Saccharimonadia	D_3__Saccharimonadales	Other	Other	0.00350693	0	0	0	0	0	0	0	0
D_0__Bacteria	D_1__Planctomycetes	D_2__Phycisphaerae	D_3__CCM11a	D_4__uncultured planctomycete	D_5__uncultured planctomycete	0.00350693	0	0	0	0	0	0	0	0
D_0__Bacteria	D_1__Planctomycetes	D_2__Phycisphaerae	D_3__MSBL9	D_4__SG8-4	Ambiguous_taxa	0.00350693	0	0	0	0	0	0	0	0
D_0__Bacteria	D_1__Planctomycetes	D_2__Phycisphaerae	D_3__MSBL9	D_4__SG8-4	D_5__uncultured planctomycete	0.00350693	0	0	0	0	0	0	0	0
D_0__Bacteria	D_1__Planctomycetes	D_2__Phycisphaerae	D_3__Pla1 lineage	Ambiguous_taxa	Ambiguous_taxa	0.00350693	0	0	0	0	0	0	0	0
D_0__Bacteria	D_1__Planctomycetes	D_2__Phycisphaerae	D_3__Tepidisphaerales	D_4__Tepidisphaeraceae	D_5__Tepidisphaera	0.00350693	0	0	0	0	0	0	0	0
D_0__Bacteria	D_1__Planctomycetes	D_2__Phycisphaerae	Other	Other	Other	0.00350693	0	0	0	0	0	0	0	0
D_0__Bacteria	D_1__Planctomycetes	D_2__Pla3 lineage	Other	Other	Other	0.00350693	0	0	0	0	0	0	0	0
D_0__Bacteria	D_1__Planctomycetes	D_2__Planctomycetacia	D_3__Isosphaerales	D_4__Isosphaeraceae	D_5__Isosphaera	0.00350693	0	0	0	0	0	0	0	0
D_0__Bacteria	D_1__Planctomycetes	D_2__Planctomycetacia	D_3__Isosphaerales	D_4__Isosphaeraceae	D_5__Paludisphaera	0.00350693	0	0	0	0	0	0	0	0
D_0__Bacteria	D_1__Planctomycetes	D_2__Planctomycetacia	D_3__Isosphaerales	D_4__Isosphaeraceae	D_5__Singulisphaera	0.00350693	0	0	0	0	0	0	0	0
D_0__Bacteria	D_1__Planctomycetes	D_2__Planctomycetacia	D_3__Isosphaerales	D_4__Isosphaeraceae	D_5__uncultured	0.00350693	0	0	0	0	0	0	0	0
D_0__Bacteria	D_1__Planctomycetes	D_2__Planctomycetacia	D_3__Isosphaerales	D_4__Isosphaeraceae	Other	0.00350693	0	0	0	0	0	0	0	0
D_0__Bacteria	D_1__Planctomycetes	D_2__Planctomycetacia	D_3__Pirellulales	D_4__Pirellulaceae	D_5__Candidatus Anammoximicrobium	0.00350693	0	0	0	0	0	0	0	0
D_0__Bacteria	D_1__Planctomycetes	D_2__Planctomycetacia	D_3__Planctomycetales	D_4__uncultured	D_5__uncultured bacterium	0.00350693	0	0	0	0	0	0	0	0
D_0__Bacteria	D_1__Planctomycetes	D_2__vadinHA49	Other	Other	Other	0.00350693	0	0	0	0	0	0	0	0
D_0__Bacteria	D_1__Proteobacteria	D_2__Alphaproteobacteria	D_3__Acetobacterales	D_4__Acetobacteraceae	D_5__Acidocella	0.00350693	0	0	0	0	0	0	0	0
D_0__Bacteria	D_1__Proteobacteria	D_2__Alphaproteobacteria	D_3__Micavibrionales	D_4__Micavibrionaceae	D_5__uncultured	0.00350693	0	0	0	0	0	0	0	0
D_0__Bacteria	D_1__Proteobacteria	D_2__Alphaproteobacteria	D_3__Rhizobiales	D_4__Beijerinckiaceae	D_5__Bosea	0.00350693	0	0	0	0	0	0	0	0
D_0__Bacteria	D_1__Proteobacteria	D_2__Alphaproteobacteria	D_3__Sphingomonadales	D_4__Sphingomonadaceae	D_5__MN 122.2a	0.00350693	0	0	0	0	0	0	0	0
D_0__Bacteria	D_1__Proteobacteria	D_2__Deltaproteobacteria	D_3__DTB120	D_4__Deltaproteobacteria bacterium GWC2_55_46	D_5__Deltaproteobacteria bacterium GWC2_55_46	0.00350693	0	0	0	0	0	0	0	0
D_0__Bacteria	D_1__Proteobacteria	D_2__Deltaproteobacteria	D_3__Deltaproteobacteria Incertae Sedis	D_4__Unknown Family	D_5__Deferrisoma	0.00350693	0	0	0	0	0	0	0	0
D_0__Bacteria	D_1__Proteobacteria	D_2__Deltaproteobacteria	D_3__Desulfobacterales	D_4__Desulfobacteraceae	Other	0.00350693	0	0	0	0	0	0	0	0
D_0__Bacteria	D_1__Proteobacteria	D_2__Deltaproteobacteria	D_3__Desulfobacterales	D_4__Desulfobulbaceae	Other	0.00350693	0	0	0	0	0	0	0	0
D_0__Bacteria	D_1__Proteobacteria	D_2__Deltaproteobacteria	D_3__Desulfovibrionales	D_4__Desulfovibrionaceae	D_5__Desulfovibrio	0.00350693	0	0	0	0	0	0	0	0
D_0__Bacteria	D_1__Proteobacteria	D_2__Deltaproteobacteria	D_3__MBNT15	D_4__Deltaproteobacteria bacterium RBG_13_61_14	D_5__Deltaproteobacteria bacterium RBG_13_61_14	0.00350693	0	0	0	0	0	0	0	0
D_0__Bacteria	D_1__Proteobacteria	D_2__Deltaproteobacteria	D_3__Myxococcales	D_4__Eel-36e1D6	Other	0.00350693	0	0	0	0	0	0	0	0
D_0__Bacteria	D_1__Proteobacteria	D_2__Deltaproteobacteria	D_3__Myxococcales	D_4__P3OB-42	D_5__uncultured Stigmatella sp.	0.00350693	0	0	0	0	0	0	0	0
D_0__Bacteria	D_1__Proteobacteria	D_2__Deltaproteobacteria	D_3__Myxococcales	D_4__Sandaracinaceae	Other	0.00350693	0	0	0	0	0	0	0	0
D_0__Bacteria	D_1__Proteobacteria	D_2__Deltaproteobacteria	D_3__Myxococcales	D_4__UASB-TL25	Other	0.00350693	0	0	0	0	0	0	0	0
D_0__Bacteria	D_1__Proteobacteria	D_2__Deltaproteobacteria	D_3__Oligoflexales	D_4__Oligoflexaceae	Other	0.00350693	0	0	0	0	0	0	0	0
D_0__Bacteria	D_1__Proteobacteria	D_2__Deltaproteobacteria	D_3__SAR324 clade(Marine group B)	Other	Other	0.00350693	0	0	0	0	0	0	0	0
D_0__Bacteria	D_1__Proteobacteria	D_2__Gammaproteobacteria	D_3__Betaproteobacteriales	D_4__Methylophilaceae	D_5__uncultured	0.00350693	0	0	0	0	0	0	0	0
D_0__Bacteria	D_1__Proteobacteria	D_2__Gammaproteobacteria	D_3__Betaproteobacteriales	D_4__Rhodocyclaceae	D_5__Georgfuchsia	0.00350693	0	0	0	0	0	0	0	0
D_0__Bacteria	D_1__Proteobacteria	D_2__Gammaproteobacteria	D_3__Betaproteobacteriales	D_4__Rhodocyclaceae	D_5__Sterolibacterium	0.00350693	0	0	0	0	0	0	0	0
D_0__Bacteria	D_1__Proteobacteria	D_2__Gammaproteobacteria	D_3__Betaproteobacteriales	D_4__SC-I-84	Other	0.00350693	0	0	0	0	0	0	0	0
D_0__Bacteria	D_1__Proteobacteria	D_2__Gammaproteobacteria	D_3__Coxiellales	D_4__Coxiellaceae	D_5__Coxiella	0.00350693	0	0	0	0	0	0	0	0
D_0__Bacteria	D_1__Proteobacteria	D_2__Gammaproteobacteria	D_3__Gammaproteobacteria Incertae Sedis	D_4__Unknown Family	D_5__Candidatus Ovatusbacter	0.00350693	0	0	0	0	0	0	0	0
D_0__Bacteria	D_1__Proteobacteria	D_2__Gammaproteobacteria	D_3__Methylococcales	D_4__Methylomonaceae	D_5__Methylosarcina	0.00350693	0	0	0	0	0	0	0	0
D_0__Bacteria	D_1__Proteobacteria	D_2__Gammaproteobacteria	D_3__Methylococcales	Other	Other	0.00350693	0	0	0	0	0	0	0	0
D_0__Bacteria	D_1__Proteobacteria	D_2__Gammaproteobacteria	D_3__Pseudomonadales	D_4__Moraxellaceae	Ambiguous_taxa	0.00350693	0	0	0	0	0	0	0	0
D_0__Bacteria	D_1__Proteobacteria	D_2__Gammaproteobacteria	D_3__Salinisphaerales	D_4__Solimonadaceae	D_5__Nevskia	0.00350693	0	0	0	0	0	0	0	0
D_0__Bacteria	D_1__Proteobacteria	D_2__Gammaproteobacteria	D_3__Xanthomonadales	D_4__Rhodanobacteraceae	Other	0.00350693	0	0	0	0	0	0	0	0
D_0__Bacteria	D_1__Proteobacteria	D_2__Gammaproteobacteria	D_3__Xanthomonadales	D_4__Xanthomonadaceae	Ambiguous_taxa	0.00350693	0	0	0	0	0	0	0	0
D_0__Bacteria	D_1__Rokubacteria	D_2__NC10	D_3__Methylomirabilales	D_4__Methylomirabilaceae	D_5__Candidatus Methylomirabilis	0.00350693	0	0	0	0	0	0	0	0
D_0__Bacteria	D_1__Spirochaetes	D_2__Spirochaetia	D_3__Spirochaetales	D_4__Spirochaetaceae	Other	0.00350693	0	0	0	0	0	0	0	0
D_0__Bacteria	D_1__Verrucomicrobia	D_2__Verrucomicrobiae	D_3__Pedosphaerales	D_4__Pedosphaeraceae	D_5__uncultured Verrucomicrobia bacterium	0.00350693	0	0	0	0	0	0	0	0
D_0__Bacteria	D_1__WPS-2	D_2__bacterium ADurb.Bin236	D_3__bacterium ADurb.Bin236	D_4__bacterium ADurb.Bin236	D_5__bacterium ADurb.Bin236	0.00350693	0	0	0	0	0	0	0	0
D_0__Bacteria	D_1__WPS-2	D_2__metagenome	D_3__metagenome	D_4__metagenome	D_5__metagenome	0.00350693	0	0	0	0	0	0	0	0
D_0__Bacteria	D_1__WS2	Other	Other	Other	Other	0.00350693	0	0	0	0	0	0	0	0
D_0__Bacteria	D_1__Zixibacteria	D_2__uncultured Caldithrix sp.	D_3__uncultured Caldithrix sp.	D_4__uncultured Caldithrix sp.	D_5__uncultured Caldithrix sp.	0.00350693	0	0	0	0	0	0	0	0

## Sheet: File 02
			SI. File 02 Distribution of different OTUs across the samples.
#OTU ID	SUL	NT	FE	AS	BIC	MIX	GW	MN	AS3	taxonomy	SUL	NT	FE	AS	BIC	MIX	GW	MN	AS3		SUL	NT	FE	AS	BIC	MIX	GW	MN	AS3
4200	5414	120	53	0	57	0	0	0	0	D_0__Bacteria; D_1__Bacteroidetes; D_2__Bacteroidia; D_3__Bacteroidales; D_4__Tannerellaceae; D_5__Macellibacteroides; D_6__uncultured bacterium	SUL	NT	FE		BIC						18.9865	0.420831	0.185867	0	0.199895	0	0	0	0
2100	4697	0	0	0	0	0	0	0	0	D_0__Bacteria; D_1__Firmicutes; D_2__Clostridia; D_3__Clostridiales; D_4__Peptococcaceae; D_5__Desulfosporosinus	SUL										16.472	0	0	0	0	0	0	0	0
6107	4658	0	0	0	0	0	0	8	0	D_0__Bacteria; D_1__Spirochaetes; D_2__Spirochaetia; D_3__Spirochaetales; D_4__Spirochaetaceae; D_5__uncultured; Ambiguous_taxa	SUL							MN			16.3353	0	0	0	0	0	0	0.0280554	0
7701	3732	0	0	0	0	0	0	0	0	D_0__Bacteria; D_1__Firmicutes; D_2__Clostridia; D_3__Clostridiales; D_4__Peptococcaceae; D_5__Desulfosporosinus	SUL										13.0878	0	0	0	0	0	0	0	0
4511	1297	0	22	0	0	0	0	0	0	D_0__Bacteria; D_1__Firmicutes; D_2__Clostridia; D_3__Clostridiales; D_4__Peptococcaceae; D_5__Desulfotomaculum	SUL		FE								4.54848	0	0.0771524	0	0	0	0	0	0
1853	1030	0	0	0	1	0	0	23	0	D_0__Bacteria; D_1__Spirochaetes; D_2__Spirochaetia; D_3__Spirochaetales; D_4__Spirochaetaceae; D_5__uncultured; Ambiguous_taxa	SUL				BIC			MN			3.61213	0	0	0	0.00350693	0	0	0.0806593	0
2885	793	0	0	0	1	0	0	2	0	D_0__Bacteria; D_1__Spirochaetes; D_2__Spirochaetia; D_3__Spirochaetales; D_4__Spirochaetaceae; D_5__uncultured; Ambiguous_taxa	SUL				BIC			MN			2.78099	0	0	0	0.00350693	0	0	0.00701385	0
7403	662	0	44	1	485	655	1	6471	1	D_0__Bacteria; D_1__Spirochaetes; D_2__Spirochaetia; D_3__Spirochaetales; D_4__Spirochaetaceae; D_5__uncultured; Ambiguous_taxa	SUL		FE		BIC	MIX		MN	AS3		2.32159	0	0.154305	0.00350693	1.70086	2.29704	0.00350693	22.6933	0.00350693
5790	518	0	0	0	3	0	0	151	0	D_0__Archaea; D_1__Euryarchaeota; D_2__Methanomicrobia; D_3__Methanosarcinales; D_4__Methanosarcinaceae; D_5__Methanosarcina	SUL				BIC			MN			1.81659	0	0	0	0.0105208	0	0	0.529546	0
10146	370	0	0	0	0	0	0	0	0	D_0__Bacteria; D_1__Spirochaetes; D_2__Spirochaetia; D_3__Spirochaetales; D_4__Spirochaetaceae; D_5__uncultured; Ambiguous_taxa	SUL										1.29756	0	0	0	0	0	0	0	0
6782	312	3	5	0	6	0	1	0	0	D_0__Bacteria; D_1__Bacteroidetes; D_2__Bacteroidia; D_3__Bacteroidales; D_4__Tannerellaceae; D_5__Macellibacteroides; D_6__uncultured bacterium	SUL	NT	FE		BIC						1.09416	0.0105208	0.0175346	0	0.0210416	0	0.00350693	0	0
15	285	0	0	0	1	0	0	4	0	D_0__Bacteria; D_1__Spirochaetes; D_2__Spirochaetia; D_3__Spirochaetales; D_4__Spirochaetaceae; D_5__uncultured; Ambiguous_taxa	SUL				BIC			MN			0.999474	0	0	0	0.00350693	0	0	0.0140277	0
86	210	0	0	0	0	0	0	0	0	D_0__Bacteria; D_1__Firmicutes; D_2__Clostridia; D_3__Clostridiales; D_4__Gracilibacteraceae; D_5__Lutispora	SUL										0.736454	0	0	0	0	0	0	0	0
3769	206	0	0	0	0	0	0	0	0	D_0__Bacteria; D_1__Firmicutes; D_2__Clostridia; D_3__Clostridiales; D_4__Peptococcaceae; D_5__Desulfosporosinus	SUL										0.722427	0	0	0	0	0	0	0	0
70	201	11	2	0	5	485	0	1	0	D_0__Bacteria; D_1__Bacteroidetes; D_2__Bacteroidia; D_3__Bacteroidales; D_4__Dysgonomonadaceae; D_5__Petrimonas; Ambiguous_taxa	SUL	NT	FE		BIC	MIX		MN			0.704892	0.0385762	0.00701385	0	0.0175346	1.70086	0	0.00350693	0
62	187	0	0	0	0	0	0	48	0	D_0__Archaea; D_1__Euryarchaeota; D_2__Methanomicrobia; D_3__Methanosarcinales; D_4__Methanosarcinaceae; D_5__Methanosarcina	SUL							MN			0.655795	0	0	0	0	0	0	0.168332	0
9626	186	0	0	0	0	0	0	0	0	D_0__Bacteria; D_1__Firmicutes; D_2__Clostridia; D_3__Clostridiales; D_4__Peptococcaceae; D_5__Desulfosporosinus	SUL										0.652288	0	0	0	0	0	0	0	0
94	166	0	0	0	0	0	0	0	0	D_0__Bacteria; D_1__Bacteroidetes; D_2__Bacteroidia; D_3__Sphingobacteriales; D_4__Lentimicrobiaceae	SUL										0.58215	0	0	0	0	0	0	0	0
325	147	0	0	0	0	0	0	0	0	D_0__Bacteria; D_1__Spirochaetes; D_2__Spirochaetia; D_3__Spirochaetales; D_4__Spirochaetaceae; D_5__uncultured; Ambiguous_taxa	SUL										0.515518	0	0	0	0	0	0	0	0
99	126	0	0	0	8	57	0	0	0	D_0__Bacteria; D_1__Bacteroidetes; D_2__Bacteroidia; D_3__Bacteroidales; D_4__Dysgonomonadaceae; D_5__Proteiniphilum; Ambiguous_taxa	SUL				BIC	MIX					0.441873	0	0	0	0.0280554	0.199895	0	0	0
5811	125	0	0	0	0	0	0	0	0	D_0__Bacteria; D_1__Firmicutes; D_2__Clostridia; D_3__Clostridiales; D_4__Peptococcaceae; D_5__Desulfosporosinus	SUL										0.438366	0	0	0	0	0	0	0	0
602	121	2	1	0	2	0	0	0	0	D_0__Bacteria; D_1__Bacteroidetes; D_2__Bacteroidia; D_3__Bacteroidales; D_4__Tannerellaceae; D_5__Macellibacteroides; D_6__uncultured bacterium	SUL	NT	FE		BIC						0.424338	0.00701385	0.00350693	0	0.00701385	0	0	0	0
9622	109	0	0	0	0	0	0	15	0	D_0__Bacteria; D_1__Firmicutes; D_2__Clostridia; D_3__Clostridiales; D_4__Family XIII; D_5__Anaerovorax	SUL							MN			0.382255	0	0	0	0	0	0	0.0526039	0
1049	107	0	0	0	0	0	0	0	0	D_0__Bacteria; D_1__Firmicutes; D_2__Negativicutes; D_3__Selenomonadales; D_4__Veillonellaceae; D_5__Sporomusa; Ambiguous_taxa	SUL										0.375241	0	0	0	0	0	0	0	0
10087	107	0	0	0	0	0	0	0	0	D_0__Bacteria; D_1__Firmicutes; D_2__Clostridia; D_3__Clostridiales; D_4__Peptococcaceae; D_5__Desulfosporosinus	SUL										0.375241	0	0	0	0	0	0	0	0
7393	89	0	0	0	0	0	0	0	0	D_0__Bacteria; D_1__Spirochaetes; D_2__Spirochaetia; D_3__Spirochaetales; D_4__Spirochaetaceae; D_5__uncultured; Ambiguous_taxa	SUL										0.312116	0	0	0	0	0	0	0	0
132	82	0	0	0	14	0	0	4	0	D_0__Bacteria; D_1__Firmicutes; D_2__Clostridia; D_3__Clostridiales; D_4__Clostridiaceae 1	SUL				BIC			MN			0.287568	0	0	0	0.049097	0	0	0.0140277	0
5016	80	0	0	0	0	0	0	0	0	D_0__Bacteria; D_1__Spirochaetes; D_2__Spirochaetia; D_3__Spirochaetales; D_4__Spirochaetaceae; D_5__uncultured; Ambiguous_taxa	SUL										0.280554	0	0	0	0	0	0	0	0
10394	74	0	0	0	0	0	0	1	0	D_0__Bacteria; D_1__Spirochaetes; D_2__Spirochaetia; D_3__Spirochaetales; D_4__Spirochaetaceae; D_5__uncultured; Ambiguous_taxa	SUL							MN			0.259513	0	0	0	0	0	0	0.00350693	0
129	72	0	2	0	0	0	0	0	0	D_0__Bacteria; D_1__Proteobacteria; D_2__Gammaproteobacteria; D_3__Aeromonadales; D_4__Aeromonadaceae; D_5__Aeromonas	SUL		FE								0.252499	0	0.00701385	0	0	0	0	0	0
39	71	0	1	0	0	0	0	0	0	D_0__Bacteria; D_1__Firmicutes; D_2__Clostridia; D_3__Clostridiales; D_4__Peptococcaceae; D_5__Desulfotomaculum	SUL		FE								0.248992	0	0.00350693	0	0	0	0	0	0
6380	65	0	6	0	0	0	0	0	0	D_0__Bacteria; D_1__Bacteroidetes; D_2__Bacteroidia; D_3__Bacteroidales; D_4__Tannerellaceae; D_5__Macellibacteroides; D_6__uncultured bacterium	SUL		FE								0.22795	0	0.0210416	0	0	0	0	0	0
694	65	0	0	0	0	0	0	0	0	D_0__Bacteria; D_1__Firmicutes; D_2__Clostridia; D_3__Clostridiales; D_4__Peptococcaceae; D_5__Desulfosporosinus	SUL										0.22795	0	0	0	0	0	0	0	0
6157	65	0	0	0	0	0	0	0	0	D_0__Bacteria; D_1__Firmicutes; D_2__Clostridia; D_3__Clostridiales; D_4__Peptococcaceae; D_5__Desulfosporosinus	SUL										0.22795	0	0	0	0	0	0	0	0
10	60	0	1	0	0	0	0	0	0	D_0__Bacteria; D_1__Bacteroidetes; D_2__Bacteroidia; D_3__Bacteroidales; D_4__Tannerellaceae; D_5__Macellibacteroides	SUL		FE								0.210416	0	0.00350693	0	0	0	0	0	0
2540	51	0	0	0	0	0	0	0	0	D_0__Bacteria; D_1__Firmicutes; D_2__Clostridia; D_3__Clostridiales; D_4__Peptococcaceae; D_5__Desulfosporosinus	SUL										0.178853	0	0	0	0	0	0	0	0
3	47	0	0	0	0	0	0	0	0	D_0__Bacteria; D_1__Firmicutes; D_2__Clostridia; D_3__Clostridiales; D_4__Peptococcaceae; D_5__Desulfosporosinus	SUL										0.164826	0	0	0	0	0	0	0	0
3644	46	0	0	0	0	0	0	0	0	D_0__Bacteria; D_1__Firmicutes; D_2__Clostridia; D_3__Clostridiales; D_4__Peptococcaceae; D_5__Desulfotomaculum	SUL										0.161319	0	0	0	0	0	0	0	0
1332	43	0	2	0	0	0	0	0	0	D_0__Bacteria; D_1__Proteobacteria; D_2__Gammaproteobacteria; D_3__Aeromonadales; D_4__Aeromonadaceae; D_5__Aeromonas	SUL		FE								0.150798	0	0.00701385	0	0	0	0	0	0
512	42	0	0	0	0	0	0	0	0	D_0__Bacteria; D_1__Spirochaetes; D_2__Spirochaetia; D_3__Spirochaetales; D_4__Spirochaetaceae; D_5__uncultured; Ambiguous_taxa	SUL										0.147291	0	0	0	0	0	0	0	0
1080	40	0	0	0	0	0	1	0	0	D_0__Bacteria; D_1__Spirochaetes; D_2__Spirochaetia; D_3__Spirochaetales; D_4__Spirochaetaceae; D_5__uncultured; Ambiguous_taxa	SUL										0.140277	0	0	0	0	0	0.00350693	0	0
10156	35	0	0	0	0	0	0	16	0	D_0__Archaea; D_1__Euryarchaeota; D_2__Methanomicrobia; D_3__Methanosarcinales; D_4__Methanosarcinaceae; D_5__Methanosarcina	SUL							MN			0.122742	0	0	0	0	0	0	0.0561108	0
9521	34	0	5	0	0	0	0	0	0	D_0__Bacteria; D_1__Proteobacteria; D_2__Gammaproteobacteria; D_3__Aeromonadales; D_4__Aeromonadaceae; D_5__Aeromonas; Ambiguous_taxa	SUL		FE								0.119235	0	0.0175346	0	0	0	0	0	0
7439	33	0	0	0	8	44	0	283	0	D_0__Bacteria; D_1__Spirochaetes; D_2__Spirochaetia; D_3__Spirochaetales; D_4__Spirochaetaceae; D_5__uncultured; Ambiguous_taxa	SUL				BIC	MIX		MN			0.115729	0	0	0	0.0280554	0.154305	0	0.99246	0
250	32	0	1	0	0	0	0	0	0	D_0__Bacteria; D_1__Proteobacteria; D_2__Gammaproteobacteria; D_3__Aeromonadales; D_4__Aeromonadaceae; D_5__Aeromonas	SUL		FE								0.112222	0	0.00350693	0	0	0	0	0	0
235	32	0	0	0	0	0	0	0	0	D_0__Bacteria; D_1__Planctomycetes; D_2__Phycisphaerae; D_3__MSBL9; D_4__KCLunmb-38-53; D_5__uncultured bacterium; D_6__uncultured bacterium	SUL										0.112222	0	0	0	0	0	0	0	0
909	32	0	0	0	0	0	0	0	0	D_0__Bacteria; D_1__Firmicutes; D_2__Clostridia; D_3__Clostridiales; D_4__Peptococcaceae; D_5__Desulfosporosinus	SUL										0.112222	0	0	0	0	0	0	0	0
10564	31	1	0	0	0	0	0	0	0	D_0__Bacteria; D_1__Bacteroidetes; D_2__Bacteroidia; D_3__Bacteroidales; D_4__Tannerellaceae; D_5__Macellibacteroides; D_6__uncultured bacterium	SUL	NT									0.108715	0.00350693	0	0	0	0	0	0	0
1828	30	0	0	0	0	0	0	0	0	D_0__Bacteria; D_1__Firmicutes; D_2__Clostridia; D_3__Clostridiales; D_4__Gracilibacteraceae; D_5__Lutispora	SUL										0.105208	0	0	0	0	0	0	0	0
1678	29	0	1	0	0	0	0	0	0	D_0__Bacteria; D_1__Proteobacteria; D_2__Gammaproteobacteria; D_3__Aeromonadales; D_4__Aeromonadaceae; D_5__Aeromonas	SUL		FE								0.101701	0	0.00350693	0	0	0	0	0	0
8331	29	0	0	0	0	0	0	0	0	D_0__Bacteria; D_1__Firmicutes; D_2__Clostridia; D_3__Clostridiales; D_4__Peptococcaceae; D_5__Desulfosporosinus	SUL										0.101701	0	0	0	0	0	0	0	0
116	26	0	0	0	0	0	0	0	0	D_0__Bacteria; D_1__Firmicutes; D_2__Negativicutes; D_3__Selenomonadales; D_4__Veillonellaceae; D_5__Sporomusa	SUL										0.0911801	0	0	0	0	0	0	0	0
274	25	0	5	0	0	0	0	0	0	D_0__Bacteria; D_1__Proteobacteria; D_2__Gammaproteobacteria; D_3__Betaproteobacteriales; D_4__Burkholderiaceae; D_5__Aquabacterium; Ambiguous_taxa	SUL		FE								0.0876732	0	0.0175346	0	0	0	0	0	0
6235	25	0	1	0	0	0	0	0	0	D_0__Bacteria; D_1__Proteobacteria; D_2__Gammaproteobacteria; D_3__Aeromonadales; D_4__Aeromonadaceae; D_5__Aeromonas	SUL		FE								0.0876732	0	0.00350693	0	0	0	0	0	0
212	24	0	5	0	0	0	0	0	0	D_0__Bacteria; D_1__Proteobacteria; D_2__Gammaproteobacteria; D_3__Aeromonadales; D_4__Aeromonadaceae; D_5__Aeromonas	SUL		FE								0.0841662	0	0.0175346	0	0	0	0	0	0
3914	23	0	2	0	0	0	0	0	0	D_0__Bacteria; D_1__Proteobacteria; D_2__Gammaproteobacteria; D_3__Aeromonadales; D_4__Aeromonadaceae; D_5__Aeromonas	SUL		FE								0.0806593	0	0.00701385	0	0	0	0	0	0
339	23	0	0	0	0	0	0	0	0	D_0__Bacteria; D_1__Firmicutes; D_2__Clostridia; D_3__Clostridiales; D_4__Peptostreptococcaceae; D_5__Paraclostridium; Ambiguous_taxa	SUL										0.0806593	0	0	0	0	0	0	0	0
378	23	0	0	0	0	0	0	0	0	D_0__Bacteria; D_1__Proteobacteria; D_2__Gammaproteobacteria; D_3__Aeromonadales; D_4__Aeromonadaceae; D_5__Aeromonas	SUL										0.0806593	0	0	0	0	0	0	0	0
1253	22	0	0	0	0	0	0	1	0	D_0__Bacteria; D_1__Spirochaetes; D_2__Spirochaetia; D_3__Spirochaetales; D_4__Spirochaetaceae; D_5__uncultured; Ambiguous_taxa	SUL							MN			0.0771524	0	0	0	0	0	0	0.00350693	0
8673	22	0	6	0	0	0	0	0	0	D_0__Bacteria; D_1__Proteobacteria; D_2__Gammaproteobacteria; D_3__Aeromonadales; D_4__Aeromonadaceae; D_5__Aeromonas	SUL		FE								0.0771524	0	0.0210416	0	0	0	0	0	0
1664	22	0	3	0	0	0	0	0	0	D_0__Bacteria; D_1__Proteobacteria; D_2__Gammaproteobacteria; D_3__Aeromonadales; D_4__Aeromonadaceae; D_5__Aeromonas	SUL		FE								0.0771524	0	0.0105208	0	0	0	0	0	0
9268	21	0	5	0	0	0	0	0	0	D_0__Bacteria; D_1__Proteobacteria; D_2__Gammaproteobacteria; D_3__Aeromonadales; D_4__Aeromonadaceae; D_5__Aeromonas	SUL		FE								0.0736454	0	0.0175346	0	0	0	0	0	0
109	21	0	0	0	0	0	0	0	0	D_0__Bacteria; D_1__Firmicutes; D_2__Clostridia; D_3__Clostridiales; D_4__Family XIII; D_5__Anaerovorax; D_6__uncultured Anaerovorax sp.	SUL										0.0736454	0	0	0	0	0	0	0	0
503	21	0	0	0	0	0	0	0	0	D_0__Bacteria; D_1__Firmicutes; D_2__Clostridia; D_3__Clostridiales; D_4__Peptococcaceae; D_5__Desulfosporosinus	SUL										0.0736454	0	0	0	0	0	0	0	0
566	21	0	0	0	0	0	0	0	0	D_0__Bacteria; D_1__Firmicutes; D_2__Clostridia; D_3__Clostridiales; D_4__Peptococcaceae; D_5__Desulfosporosinus; Ambiguous_taxa	SUL										0.0736454	0	0	0	0	0	0	0	0
1493	21	0	0	0	0	0	0	0	0	D_0__Bacteria; D_1__Firmicutes; D_2__Clostridia; D_3__Clostridiales; D_4__Peptococcaceae; D_5__Desulfosporosinus	SUL										0.0736454	0	0	0	0	0	0	0	0
7086	21	0	0	0	0	0	0	0	0	D_0__Bacteria; D_1__Firmicutes; D_2__Clostridia; D_3__Clostridiales; D_4__Peptococcaceae; D_5__Desulfosporosinus	SUL										0.0736454	0	0	0	0	0	0	0	0
7482	21	0	0	0	0	0	0	0	0	D_0__Bacteria; D_1__Firmicutes; D_2__Clostridia; D_3__Clostridiales; D_4__Peptococcaceae; D_5__Desulfosporosinus	SUL										0.0736454	0	0	0	0	0	0	0	0
10371	21	0	0	0	0	0	0	0	0	D_0__Bacteria; D_1__Firmicutes; D_2__Clostridia; D_3__Clostridiales; D_4__Peptococcaceae; D_5__Desulfosporosinus	SUL										0.0736454	0	0	0	0	0	0	0	0
5847	20	0	28	0	4	286	1	58	0	D_0__Bacteria; D_1__Spirochaetes; D_2__Spirochaetia; D_3__Spirochaetales; D_4__Spirochaetaceae; D_5__uncultured; Ambiguous_taxa	SUL		FE		BIC	MIX		MN			0.0701385	0	0.0981939	0	0.0140277	1.00298	0.00350693	0.203402	0
7081	20	0	0	0	1	7	0	55	0	D_0__Bacteria; D_1__Spirochaetes; D_2__Spirochaetia; D_3__Spirochaetales; D_4__Spirochaetaceae; D_5__uncultured; Ambiguous_taxa	SUL				BIC	MIX		MN			0.0701385	0	0	0	0.00350693	0.0245485	0	0.192881	0
2962	20	0	0	0	0	0	0	0	0	D_0__Bacteria; D_1__Firmicutes; D_2__Clostridia; D_3__Clostridiales; D_4__Peptococcaceae; D_5__Desulfosporosinus	SUL										0.0701385	0	0	0	0	0	0	0	0
4636	19	0	0	0	0	0	0	0	0	D_0__Bacteria; D_1__Firmicutes; D_2__Clostridia; D_3__Clostridiales; D_4__Peptococcaceae; D_5__Desulfosporosinus	SUL										0.0666316	0	0	0	0	0	0	0	0
1207	18	0	0	0	0	0	0	0	0	D_0__Bacteria; D_1__Firmicutes; D_2__Clostridia; D_3__Clostridiales; D_4__Peptococcaceae; D_5__Desulfosporosinus	SUL										0.0631247	0	0	0	0	0	0	0	0
6609	18	0	0	0	0	0	0	0	0	D_0__Bacteria; D_1__Firmicutes; D_2__Clostridia; D_3__Clostridiales; D_4__Peptococcaceae; D_5__Desulfosporosinus	SUL										0.0631247	0	0	0	0	0	0	0	0
7204	18	0	0	0	0	0	0	0	0	D_0__Bacteria; D_1__Spirochaetes; D_2__Spirochaetia; D_3__Spirochaetales; D_4__Spirochaetaceae; D_5__uncultured; Ambiguous_taxa	SUL										0.0631247	0	0	0	0	0	0	0	0
3582	17	0	0	0	0	0	0	0	0	D_0__Bacteria; D_1__Firmicutes; D_2__Clostridia; D_3__Clostridiales; D_4__Peptococcaceae; D_5__Desulfosporosinus	SUL										0.0596177	0	0	0	0	0	0	0	0
6578	17	0	0	0	0	0	0	0	0	D_0__Bacteria; D_1__Firmicutes; D_2__Clostridia; D_3__Clostridiales; D_4__Peptococcaceae; D_5__Desulfosporosinus	SUL										0.0596177	0	0	0	0	0	0	0	0
1230	16	0	0	0	0	0	0	0	0	D_0__Bacteria	SUL										0.0561108	0	0	0	0	0	0	0	0
891	15	0	0	0	9	16	0	124	0	D_0__Bacteria; D_1__Spirochaetes; D_2__Spirochaetia; D_3__Spirochaetales; D_4__Spirochaetaceae; D_5__uncultured; Ambiguous_taxa	SUL				BIC	MIX		MN			0.0526039	0	0	0	0.0315623	0.0561108	0	0.434859	0
19	15	0	0	0	10	11	0	56	0	D_0__Bacteria; D_1__Spirochaetes; D_2__Spirochaetia; D_3__Spirochaetales; D_4__Spirochaetaceae; D_5__uncultured; Ambiguous_taxa	SUL				BIC	MIX		MN			0.0526039	0	0	0	0.0350693	0.0385762	0	0.196388	0
255	15	0	0	0	0	0	0	0	0	D_0__Bacteria	SUL										0.0526039	0	0	0	0	0	0	0	0
431	15	0	0	0	0	0	0	0	0	D_0__Bacteria; D_1__Firmicutes; D_2__Negativicutes; D_3__Selenomonadales; D_4__Veillonellaceae; D_5__Sporomusa	SUL										0.0526039	0	0	0	0	0	0	0	0
1846	15	0	0	0	0	0	0	0	0	D_0__Bacteria; D_1__Firmicutes; D_2__Clostridia; D_3__Clostridiales; D_4__Peptococcaceae; D_5__Desulfosporosinus	SUL										0.0526039	0	0	0	0	0	0	0	0
10639	15	0	0	0	0	0	0	0	0	D_0__Bacteria; D_1__Firmicutes; D_2__Clostridia; D_3__Clostridiales; D_4__Peptococcaceae; D_5__Desulfosporosinus	SUL										0.0526039	0	0	0	0	0	0	0	0
690	14	0	0	0	0	0	0	0	0	D_0__Bacteria; D_1__Firmicutes; D_2__Negativicutes; D_3__Selenomonadales; D_4__Veillonellaceae; D_5__Sporomusa; Ambiguous_taxa	SUL										0.049097	0	0	0	0	0	0	0	0
3783	14	0	0	0	0	0	0	0	0	D_0__Bacteria; D_1__Firmicutes; D_2__Clostridia; D_3__Clostridiales; D_4__Peptococcaceae; D_5__Desulfosporosinus	SUL										0.049097	0	0	0	0	0	0	0	0
6290	14	0	0	0	0	0	0	0	0	D_0__Bacteria; D_1__Firmicutes; D_2__Clostridia; D_3__Clostridiales; D_4__Peptococcaceae; D_5__Desulfosporosinus	SUL										0.049097	0	0	0	0	0	0	0	0
98	13	0	0	0	0	0	0	214	0	D_0__Bacteria; D_1__Firmicutes; D_2__Clostridia; D_3__Clostridiales; D_4__Peptostreptococcaceae; D_5__Sporacetigenium; D_6__uncultured bacterium	SUL							MN			0.04559	0	0	0	0	0	0	0.750482	0
850	13	0	0	0	0	0	0	0	0	D_0__Bacteria; D_1__Firmicutes; D_2__Negativicutes; D_3__Selenomonadales; D_4__Veillonellaceae; D_5__Sporomusa	SUL										0.04559	0	0	0	0	0	0	0	0
2666	13	0	0	0	0	0	0	0	0	D_0__Bacteria; D_1__Firmicutes; D_2__Clostridia; D_3__Clostridiales; D_4__Peptococcaceae; D_5__Desulfosporosinus	SUL										0.04559	0	0	0	0	0	0	0	0
2902	13	0	0	0	0	0	0	0	0	D_0__Bacteria; D_1__Proteobacteria; D_2__Gammaproteobacteria; D_3__Aeromonadales; D_4__Aeromonadaceae; D_5__Aeromonas	SUL										0.04559	0	0	0	0	0	0	0	0
314	12	0	0	0	0	0	0	1	0	D_0__Bacteria; D_1__Chloroflexi; D_2__Anaerolineae; D_3__Anaerolineales; D_4__Anaerolineaceae; D_5__Levilinea; D_6__uncultured bacterium	SUL							MN			0.0420831	0	0	0	0	0	0	0.00350693	0
5723	12	1	0	0	0	0	0	0	0	D_0__Bacteria; D_1__Bacteroidetes; D_2__Bacteroidia; D_3__Bacteroidales; D_4__Tannerellaceae; D_5__Macellibacteroides; D_6__uncultured bacterium	SUL	NT									0.0420831	0.00350693	0	0	0	0	0	0	0
1286	12	0	0	0	0	0	0	0	0	D_0__Bacteria; D_1__Firmicutes; D_2__Clostridia; D_3__Clostridiales; D_4__Peptococcaceae; D_5__Desulfotomaculum	SUL										0.0420831	0	0	0	0	0	0	0	0
2111	12	0	0	0	0	0	0	0	0	D_0__Bacteria; D_1__Spirochaetes; D_2__Spirochaetia; D_3__Spirochaetales; D_4__Spirochaetaceae; D_5__uncultured; Ambiguous_taxa	SUL										0.0420831	0	0	0	0	0	0	0	0
2333	12	0	0	0	0	0	0	0	0	D_0__Bacteria; D_1__Firmicutes; D_2__Clostridia; D_3__Clostridiales; D_4__Peptococcaceae; D_5__Desulfosporosinus	SUL										0.0420831	0	0	0	0	0	0	0	0
6041	12	0	0	0	0	0	0	0	0	D_0__Bacteria; D_1__Spirochaetes; D_2__Spirochaetia; D_3__Spirochaetales; D_4__Spirochaetaceae; D_5__uncultured; Ambiguous_taxa	SUL										0.0420831	0	0	0	0	0	0	0	0
387	11	0	0	0	5	0	0	0	0	D_0__Bacteria; D_1__Firmicutes; D_2__Clostridia; D_3__Clostridiales; D_4__Syntrophomonadaceae	SUL				BIC						0.0385762	0	0	0	0.0175346	0	0	0	0
3673	11	0	0	0	1	0	0	0	0	D_0__Bacteria; D_1__Bacteroidetes; D_2__Bacteroidia; D_3__Bacteroidales; D_4__Tannerellaceae; D_5__Macellibacteroides; D_6__uncultured bacterium	SUL				BIC						0.0385762	0	0	0	0.00350693	0	0	0	0
1223	11	0	0	0	0	0	0	0	0	D_0__Bacteria; D_1__Spirochaetes; D_2__Spirochaetia; D_3__Spirochaetales; D_4__Spirochaetaceae; D_5__uncultured; Ambiguous_taxa	SUL										0.0385762	0	0	0	0	0	0	0	0
6540	11	0	0	0	0	0	0	0	0	D_0__Bacteria; D_1__Proteobacteria; D_2__Gammaproteobacteria; D_3__Betaproteobacteriales; D_4__Rhodocyclaceae	SUL										0.0385762	0	0	0	0	0	0	0	0
8559	11	0	0	0	0	0	0	0	0	D_0__Bacteria; D_1__Proteobacteria; D_2__Gammaproteobacteria; D_3__Aeromonadales; D_4__Aeromonadaceae; D_5__Aeromonas	SUL										0.0385762	0	0	0	0	0	0	0	0
3667	10	0	0	0	0	0	0	0	0	D_0__Bacteria; D_1__Firmicutes; D_2__Clostridia; D_3__Clostridiales; D_4__Peptococcaceae; D_5__Desulfosporosinus	SUL										0.0350693	0	0	0	0	0	0	0	0
4892	10	0	0	0	0	0	0	0	0	D_0__Bacteria; D_1__Spirochaetes; D_2__Spirochaetia; D_3__Spirochaetales; D_4__Spirochaetaceae; D_5__uncultured; Ambiguous_taxa	SUL										0.0350693	0	0	0	0	0	0	0	0
8735	10	0	0	0	0	0	0	0	0	D_0__Bacteria; D_1__Proteobacteria; D_2__Gammaproteobacteria; D_3__Aeromonadales; D_4__Aeromonadaceae; D_5__Aeromonas	SUL										0.0350693	0	0	0	0	0	0	0	0
921	9	0	0	0	0	0	0	0	0	D_0__Bacteria; D_1__Firmicutes; D_2__Negativicutes; D_3__Selenomonadales; D_4__Veillonellaceae; D_5__Anaerospora; Ambiguous_taxa	SUL										0.0315623	0	0	0	0	0	0	0	0
2796	9	0	0	0	0	0	0	0	0	D_0__Bacteria; D_1__Proteobacteria; D_2__Gammaproteobacteria; D_3__Aeromonadales; D_4__Aeromonadaceae; D_5__Aeromonas	SUL										0.0315623	0	0	0	0	0	0	0	0
3264	9	0	0	0	0	0	0	0	0	D_0__Bacteria; D_1__Firmicutes; D_2__Clostridia; D_3__Clostridiales; D_4__Peptococcaceae; D_5__Desulfosporosinus	SUL										0.0315623	0	0	0	0	0	0	0	0
7152	9	0	0	0	0	0	0	0	0	D_0__Bacteria; D_1__Firmicutes; D_2__Clostridia; D_3__Clostridiales; D_4__Peptococcaceae; D_5__Desulfotomaculum	SUL										0.0315623	0	0	0	0	0	0	0	0
7661	9	0	0	0	0	0	0	0	0	D_0__Bacteria; D_1__Firmicutes; D_2__Clostridia; D_3__Clostridiales; D_4__Peptococcaceae; D_5__Desulfosporosinus	SUL										0.0315623	0	0	0	0	0	0	0	0
9101	9	0	0	0	0	0	0	0	0	D_0__Bacteria; D_1__Firmicutes; D_2__Clostridia; D_3__Clostridiales; D_4__Gracilibacteraceae; D_5__Lutispora	SUL										0.0315623	0	0	0	0	0	0	0	0
10357	9	0	0	0	0	0	0	0	0	D_0__Bacteria; D_1__Bacteroidetes; D_2__Bacteroidia; D_3__Sphingobacteriales; D_4__Lentimicrobiaceae	SUL										0.0315623	0	0	0	0	0	0	0	0
1767	8	0	0	0	0	12	0	46	0	D_0__Bacteria; D_1__Spirochaetes; D_2__Spirochaetia; D_3__Spirochaetales; D_4__Spirochaetaceae; D_5__uncultured; Ambiguous_taxa	SUL					MIX		MN			0.0280554	0	0	0	0	0.0420831	0	0.161319	0
7486	8	0	0	0	0	3	0	0	0	D_0__Bacteria; D_1__Bacteroidetes; D_2__Bacteroidia; D_3__Bacteroidales; D_4__Dysgonomonadaceae; D_5__Petrimonas; Ambiguous_taxa	SUL					MIX					0.0280554	0	0	0	0	0.0105208	0	0	0
776	8	0	0	0	0	0	0	0	0	D_0__Bacteria; D_1__Bacteroidetes; D_2__Bacteroidia; D_3__Bacteroidales; D_4__Prolixibacteraceae; D_5__uncultured	SUL										0.0280554	0	0	0	0	0	0	0	0
4554	8	0	0	0	0	0	0	0	0	D_0__Bacteria; D_1__Firmicutes; D_2__Clostridia; D_3__Clostridiales; D_4__Peptococcaceae; D_5__Desulfotomaculum	SUL										0.0280554	0	0	0	0	0	0	0	0
3370	7	0	0	0	1	3	0	24	0	D_0__Bacteria; D_1__Spirochaetes; D_2__Spirochaetia; D_3__Spirochaetales; D_4__Spirochaetaceae; D_5__uncultured; Ambiguous_taxa	SUL				BIC	MIX		MN			0.0245485	0	0	0	0.00350693	0.0105208	0	0.0841662	0
635	7	0	0	0	0	0	0	0	0	D_0__Bacteria; D_1__Bacteroidetes; D_2__Bacteroidia; D_3__Bacteroidales; D_4__Tannerellaceae; D_5__Macellibacteroides; D_6__uncultured bacterium	SUL										0.0245485	0	0	0	0	0	0	0	0
843	7	0	0	0	0	0	0	0	0	D_0__Bacteria; D_1__Firmicutes; D_2__Negativicutes; D_3__Selenomonadales; D_4__Veillonellaceae	SUL										0.0245485	0	0	0	0	0	0	0	0
7825	7	0	0	0	0	0	0	0	0	D_0__Bacteria; D_1__Firmicutes; D_2__Clostridia; D_3__Clostridiales; D_4__Peptococcaceae; D_5__Desulfosporosinus	SUL										0.0245485	0	0	0	0	0	0	0	0
8614	7	0	0	0	0	0	0	0	0	D_0__Bacteria; D_1__Firmicutes; D_2__Clostridia; D_3__Clostridiales; D_4__Peptococcaceae; D_5__Desulfosporosinus	SUL										0.0245485	0	0	0	0	0	0	0	0
5040	6	0	1	0	0	0	0	0	0	D_0__Bacteria; D_1__Proteobacteria; D_2__Gammaproteobacteria; D_3__Aeromonadales; D_4__Aeromonadaceae; D_5__Aeromonas	SUL		FE								0.0210416	0	0.00350693	0	0	0	0	0	0
532	6	0	0	0	0	0	0	0	0	D_0__Bacteria; D_1__Firmicutes; D_2__Clostridia; D_3__Clostridiales; D_4__Peptococcaceae; D_5__Desulfosporosinus; Ambiguous_taxa	SUL										0.0210416	0	0	0	0	0	0	0	0
1092	6	0	0	0	0	0	0	0	0	D_0__Bacteria; D_1__Firmicutes; D_2__Clostridia; D_3__Clostridiales; D_4__Peptococcaceae; D_5__Desulfosporosinus	SUL										0.0210416	0	0	0	0	0	0	0	0
1736	6	0	0	0	0	0	0	0	0	D_0__Bacteria; D_1__Firmicutes; D_2__Negativicutes; D_3__Selenomonadales; D_4__Veillonellaceae; D_5__Sporomusa	SUL										0.0210416	0	0	0	0	0	0	0	0
842	5	0	0	0	0	0	0	2	0	D_0__Bacteria; D_1__Firmicutes; D_2__Clostridia; D_3__Clostridiales; D_4__Christensenellaceae; D_5__Christensenellaceae R-7 group	SUL							MN			0.0175346	0	0	0	0	0	0	0.00701385	0
918	5	0	0	0	0	0	0	2	0	D_0__Bacteria; D_1__Firmicutes; D_2__Clostridia; D_3__Clostridiales; D_4__Clostridiaceae 1; D_5__Fonticella; D_6__uncultured bacterium	SUL							MN			0.0175346	0	0	0	0	0	0	0.00701385	0
455	5	0	0	0	5	0	0	0	0	D_0__Bacteria; D_1__Firmicutes; D_2__Clostridia; D_3__Clostridiales; D_4__Family XI; D_5__Sedimentibacter; Ambiguous_taxa	SUL				BIC						0.0175346	0	0	0	0.0175346	0	0	0	0
1516	5	0	0	0	0	0	0	0	0	D_0__Bacteria; D_1__Firmicutes; D_2__Clostridia; D_3__Clostridiales; D_4__Peptococcaceae; D_5__Desulfosporosinus	SUL										0.0175346	0	0	0	0	0	0	0	0
1552	5	0	0	0	0	0	0	0	0	D_0__Bacteria; D_1__Bacteroidetes; D_2__Bacteroidia	SUL										0.0175346	0	0	0	0	0	0	0	0
2991	5	0	0	0	0	0	0	0	0	D_0__Bacteria; D_1__Firmicutes; D_2__Clostridia; D_3__Clostridiales; D_4__Gracilibacteraceae	SUL										0.0175346	0	0	0	0	0	0	0	0
3408	5	0	0	0	0	0	0	0	0	D_0__Bacteria; D_1__Firmicutes; D_2__Negativicutes; D_3__Selenomonadales; D_4__Veillonellaceae; D_5__Sporomusa; Ambiguous_taxa	SUL										0.0175346	0	0	0	0	0	0	0	0
4302	5	0	0	0	0	0	0	0	0	D_0__Bacteria; D_1__Proteobacteria; D_2__Gammaproteobacteria; D_3__Aeromonadales; D_4__Aeromonadaceae; D_5__Aeromonas	SUL										0.0175346	0	0	0	0	0	0	0	0
5216	5	0	0	0	0	0	0	0	0	D_0__Bacteria; D_1__Firmicutes; D_2__Negativicutes; D_3__Selenomonadales; D_4__Veillonellaceae; D_5__Sporomusa; Ambiguous_taxa	SUL										0.0175346	0	0	0	0	0	0	0	0
5802	5	0	0	0	0	0	0	0	0	D_0__Bacteria; D_1__Firmicutes; D_2__Clostridia; D_3__Clostridiales; D_4__Peptostreptococcaceae; D_5__Romboutsia	SUL										0.0175346	0	0	0	0	0	0	0	0
6027	5	0	0	0	0	0	0	0	0	D_0__Bacteria; D_1__Firmicutes; D_2__Clostridia; D_3__Clostridiales; D_4__Peptococcaceae; D_5__Desulfosporosinus	SUL										0.0175346	0	0	0	0	0	0	0	0
6476	5	0	0	0	0	0	0	0	0	D_0__Bacteria; D_1__Firmicutes; D_2__Clostridia; D_3__Clostridiales; D_4__Peptococcaceae; D_5__Desulfosporosinus	SUL										0.0175346	0	0	0	0	0	0	0	0
9287	5	0	0	0	0	0	0	0	0	D_0__Bacteria; D_1__Firmicutes; D_2__Negativicutes; D_3__Selenomonadales; D_4__Veillonellaceae; D_5__Sporomusa	SUL										0.0175346	0	0	0	0	0	0	0	0
4676	4	71	19	1232	19	1403	70	204	0	D_0__Bacteria; D_1__Proteobacteria; D_2__Gammaproteobacteria; D_3__Betaproteobacteriales; D_4__Rhodocyclaceae; D_5__Dechloromonas; Ambiguous_taxa	SUL	NT	FE		BIC	MIX		MN			0.0140277	0.248992	0.0666316	4.32053	0.0666316	4.92022	0.245485	0.715413	0
4950	4	0	0	0	2	3	0	22	0	D_0__Bacteria; D_1__Spirochaetes; D_2__Spirochaetia; D_3__Spirochaetales; D_4__Spirochaetaceae; D_5__uncultured; Ambiguous_taxa	SUL				BIC	MIX		MN			0.0140277	0	0	0	0.00701385	0.0105208	0	0.0771524	0
6643	4	0	0	0	2	3	0	17	0	D_0__Bacteria; D_1__Spirochaetes; D_2__Spirochaetia; D_3__Spirochaetales; D_4__Spirochaetaceae; D_5__uncultured; Ambiguous_taxa	SUL				BIC	MIX		MN			0.0140277	0	0	0	0.00701385	0.0105208	0	0.0596177	0
1480	4	0	0	0	0	0	0	1	0	D_0__Bacteria; D_1__Firmicutes; D_2__Negativicutes; D_3__Selenomonadales; D_4__Veillonellaceae; D_5__uncultured	SUL							MN			0.0140277	0	0	0	0	0	0	0.00350693	0
928	4	0	1	0	0	0	0	0	0	D_0__Bacteria; D_1__Firmicutes; D_2__Clostridia; D_3__Clostridiales; D_4__Peptococcaceae; D_5__Desulfotomaculum	SUL		FE								0.0140277	0	0.00350693	0	0	0	0	0	0
9213	4	0	1	0	0	0	0	0	0	D_0__Bacteria; D_1__Proteobacteria; D_2__Gammaproteobacteria; D_3__Aeromonadales; D_4__Aeromonadaceae; D_5__Aeromonas; Ambiguous_taxa	SUL		FE								0.0140277	0	0.00350693	0	0	0	0	0	0
1160	4	0	0	0	0	0	0	0	0	D_0__Bacteria; D_1__Firmicutes; D_2__Clostridia; D_3__Clostridiales; D_4__Peptococcaceae; D_5__Desulfotomaculum	SUL										0.0140277	0	0	0	0	0	0	0	0
1318	4	0	0	0	0	0	0	0	0	D_0__Bacteria; D_1__Bacteroidetes; D_2__Bacteroidia; D_3__Flavobacteriales; D_4__Flavobacteriaceae; D_5__Flavobacterium	SUL										0.0140277	0	0	0	0	0	0	0	0
1725	4	0	0	0	0	0	0	0	0	D_0__Bacteria; D_1__Bacteroidetes; D_2__Bacteroidia; D_3__Bacteroidales; D_4__Tannerellaceae; D_5__Macellibacteroides	SUL										0.0140277	0	0	0	0	0	0	0	0
2125	4	0	0	0	0	0	0	0	0	D_0__Bacteria; D_1__Proteobacteria; D_2__Gammaproteobacteria; D_3__Aeromonadales; D_4__Aeromonadaceae; D_5__Aeromonas	SUL										0.0140277	0	0	0	0	0	0	0	0
2170	4	0	0	0	0	0	0	0	0	D_0__Bacteria; D_1__Firmicutes; D_2__Clostridia; D_3__Clostridiales; D_4__Peptococcaceae; D_5__Desulfosporosinus	SUL										0.0140277	0	0	0	0	0	0	0	0
3387	4	0	0	0	0	0	0	0	0	D_0__Bacteria; D_1__Firmicutes; D_2__Clostridia; D_3__Clostridiales; D_4__Peptococcaceae; D_5__Desulfotomaculum	SUL										0.0140277	0	0	0	0	0	0	0	0
4862	4	0	0	0	0	0	0	0	0	D_0__Bacteria; D_1__Planctomycetes; D_2__Phycisphaerae; D_3__MSBL9; D_4__KCLunmb-38-53; D_5__uncultured bacterium; D_6__uncultured bacterium	SUL										0.0140277	0	0	0	0	0	0	0	0
7384	4	0	0	0	0	0	0	0	0	D_0__Bacteria; D_1__Spirochaetes; D_2__Spirochaetia; D_3__Spirochaetales; D_4__Spirochaetaceae; D_5__uncultured; Ambiguous_taxa	SUL										0.0140277	0	0	0	0	0	0	0	0
9670	4	0	0	0	0	0	0	0	0	D_0__Bacteria; D_1__Firmicutes; D_2__Clostridia; D_3__Clostridiales; D_4__Peptococcaceae; D_5__Desulfosporosinus	SUL										0.0140277	0	0	0	0	0	0	0	0
10203	4	0	0	0	0	0	0	0	0	D_0__Bacteria; D_1__Firmicutes; D_2__Clostridia; D_3__Clostridiales; D_4__Peptococcaceae; D_5__Desulfosporosinus	SUL										0.0140277	0	0	0	0	0	0	0	0
6325	3	139	30	189	4	4992	28	85	0	D_0__Bacteria; D_1__Proteobacteria; D_2__Gammaproteobacteria; D_3__Betaproteobacteriales; D_4__Rhodocyclaceae; D_5__Dechloromonas; Ambiguous_taxa	SUL	NT	FE		BIC	MIX		MN			0.0105208	0.487463	0.105208	0.662809	0.0140277	17.5066	0.0981939	0.298089	0
5775	3	0	0	0	0	0	0	9	0	D_0__Archaea; D_1__Euryarchaeota; D_2__Methanomicrobia; D_3__Methanosarcinales; D_4__Methanosarcinaceae; D_5__Methanosarcina	SUL							MN			0.0105208	0	0	0	0	0	0	0.0315623	0
748	3	1	0	0	1	0	0	2	0	D_0__Bacteria; D_1__Proteobacteria; D_2__Alphaproteobacteria; D_3__Rhizobiales; D_4__Pleomorphomonadaceae; D_5__Pleomorphomonas; D_6__uncultured bacterium	SUL	NT			BIC			MN			0.0105208	0.00350693	0	0	0.00350693	0	0	0.00701385	0
1744	3	0	0	0	3	7	0	1	0	D_0__Bacteria; D_1__Spirochaetes; D_2__Spirochaetia; D_3__Spirochaetales; D_4__Spirochaetaceae; D_5__uncultured; Ambiguous_taxa	SUL				BIC	MIX		MN			0.0105208	0	0	0	0.0105208	0.0245485	0	0.00350693	0
1150	3	0	0	0	0	0	0	0	0	D_0__Bacteria; D_1__Firmicutes; D_2__Clostridia; D_3__Clostridiales; D_4__Peptococcaceae; D_5__Desulfotomaculum	SUL										0.0105208	0	0	0	0	0	0	0	0
1169	3	0	0	0	0	0	0	0	0	D_0__Bacteria; D_1__Spirochaetes; D_2__Spirochaetia; D_3__Spirochaetales; D_4__Spirochaetaceae; D_5__uncultured; Ambiguous_taxa	SUL										0.0105208	0	0	0	0	0	0	0	0
1352	3	0	0	0	0	0	0	0	0	D_0__Bacteria	SUL										0.0105208	0	0	0	0	0	0	0	0
1494	3	0	0	0	0	0	0	0	0	D_0__Bacteria; D_1__Firmicutes; D_2__Clostridia; D_3__Clostridiales; D_4__Christensenellaceae; D_5__uncultured	SUL										0.0105208	0	0	0	0	0	0	0	0
1521	3	0	0	0	0	0	0	0	0	D_0__Bacteria; D_1__Firmicutes; D_2__Clostridia; D_3__Clostridiales; D_4__Peptococcaceae; D_5__Desulfosporosinus	SUL										0.0105208	0	0	0	0	0	0	0	0
1873	3	0	0	0	0	0	0	0	0	D_0__Bacteria; D_1__Firmicutes; D_2__Clostridia; D_3__Clostridiales; D_4__Peptococcaceae; D_5__Desulfotomaculum	SUL										0.0105208	0	0	0	0	0	0	0	0
2770	3	0	0	0	0	0	0	0	0	D_0__Bacteria; D_1__Firmicutes; D_2__Clostridia; D_3__Clostridiales; D_4__Family XIII; D_5__Anaerovorax	SUL										0.0105208	0	0	0	0	0	0	0	0
2772	3	0	0	0	0	0	0	0	0	D_0__Bacteria; D_1__Proteobacteria; D_2__Gammaproteobacteria; D_3__Aeromonadales; D_4__Aeromonadaceae; D_5__Aeromonas	SUL										0.0105208	0	0	0	0	0	0	0	0
3575	3	0	0	0	0	0	0	0	0	D_0__Bacteria; D_1__Spirochaetes; D_2__Spirochaetia; D_3__Spirochaetales; D_4__Spirochaetaceae; D_5__uncultured; Ambiguous_taxa	SUL										0.0105208	0	0	0	0	0	0	0	0
4118	3	0	0	0	0	0	0	0	0	D_0__Bacteria	SUL										0.0105208	0	0	0	0	0	0	0	0
4325	3	0	0	0	0	0	0	0	0	D_0__Bacteria; D_1__Firmicutes; D_2__Clostridia; D_3__Clostridiales; D_4__Peptococcaceae; D_5__Desulfotomaculum	SUL										0.0105208	0	0	0	0	0	0	0	0
6409	3	0	0	0	0	0	0	0	0	D_0__Bacteria; D_1__Firmicutes; D_2__Clostridia; D_3__Clostridiales; D_4__Clostridiaceae 1; D_5__Fonticella	SUL										0.0105208	0	0	0	0	0	0	0	0
6475	3	0	0	0	0	0	0	0	0	D_0__Bacteria; D_1__Firmicutes; D_2__Clostridia; D_3__Clostridiales; D_4__Peptococcaceae; D_5__Desulfosporosinus	SUL										0.0105208	0	0	0	0	0	0	0	0
7182	3	0	0	0	0	0	0	0	0	D_0__Bacteria; D_1__Proteobacteria; D_2__Gammaproteobacteria; D_3__Aeromonadales; D_4__Aeromonadaceae; D_5__Aeromonas	SUL										0.0105208	0	0	0	0	0	0	0	0
7560	3	0	0	0	0	0	0	0	0	D_0__Bacteria; D_1__Firmicutes; D_2__Clostridia; D_3__Clostridiales; D_4__Peptococcaceae; D_5__Desulfosporosinus	SUL										0.0105208	0	0	0	0	0	0	0	0
7572	3	0	0	0	0	0	0	0	0	D_0__Bacteria; D_1__Firmicutes; D_2__Clostridia; D_3__Clostridiales; D_4__Peptococcaceae; D_5__Desulfotomaculum	SUL										0.0105208	0	0	0	0	0	0	0	0
7755	3	0	0	0	0	0	0	0	0	D_0__Bacteria; D_1__Proteobacteria; D_2__Gammaproteobacteria; D_3__Betaproteobacteriales; D_4__Burkholderiaceae; D_5__Aquabacterium	SUL										0.0105208	0	0	0	0	0	0	0	0
8388	3	0	0	0	0	0	0	0	0	D_0__Bacteria; D_1__Firmicutes; D_2__Clostridia; D_3__Clostridiales; D_4__Peptococcaceae; D_5__Desulfosporosinus	SUL										0.0105208	0	0	0	0	0	0	0	0
8603	3	0	0	0	0	0	0	0	0	D_0__Archaea; D_1__Euryarchaeota; D_2__Methanomicrobia; D_3__Methanosarcinales; D_4__Methanosarcinaceae; D_5__Methanosarcina	SUL										0.0105208	0	0	0	0	0	0	0	0
9258	3	0	0	0	0	0	0	0	0	D_0__Bacteria; D_1__Proteobacteria; D_2__Gammaproteobacteria; D_3__Aeromonadales; D_4__Aeromonadaceae; D_5__Aeromonas	SUL										0.0105208	0	0	0	0	0	0	0	0
9644	3	0	0	0	0	0	0	0	0	D_0__Bacteria; D_1__Spirochaetes; D_2__Spirochaetia; D_3__Spirochaetales; D_4__Spirochaetaceae; D_5__uncultured; Ambiguous_taxa	SUL										0.0105208	0	0	0	0	0	0	0	0
10176	3	0	0	0	0	0	0	0	0	D_0__Bacteria; D_1__Firmicutes; D_2__Clostridia; D_3__Clostridiales; D_4__Peptococcaceae; D_5__Desulfosporosinus	SUL										0.0105208	0	0	0	0	0	0	0	0
10180	3	0	0	0	0	0	0	0	0	D_0__Bacteria; D_1__Firmicutes; D_2__Clostridia; D_3__Clostridiales; D_4__Peptococcaceae; D_5__Desulfosporosinus	SUL										0.0105208	0	0	0	0	0	0	0	0
6015	2	24	0	3	1	27	2	2372	0	D_0__Bacteria; D_1__Proteobacteria; D_2__Gammaproteobacteria; D_3__Betaproteobacteriales; D_4__Rhodocyclaceae	SUL	NT			BIC	MIX		MN			0.00701385	0.0841662	0	0.0105208	0.00350693	0.094687	0.00701385	8.31843	0
3955	2	0	1	0	0	0	0	17	0	D_0__Bacteria; D_1__Spirochaetes; D_2__Spirochaetia; D_3__Spirochaetales; D_4__Spirochaetaceae; D_5__uncultured; Ambiguous_taxa	SUL		FE					MN			0.00701385	0	0.00350693	0	0	0	0	0.0596177	0
568	2	0	0	0	0	0	0	13	0	D_0__Bacteria; D_1__Verrucomicrobia; D_2__Verrucomicrobiae; D_3__Pedosphaerales; D_4__Pedosphaeraceae; D_5__uncultured bacterium; D_6__uncultured bacterium	SUL							MN			0.00701385	0	0	0	0	0	0	0.04559	0
7413	2	0	0	0	6	1	0	5	0	D_0__Bacteria; D_1__Spirochaetes; D_2__Spirochaetia; D_3__Spirochaetales; D_4__Spirochaetaceae; D_5__uncultured; Ambiguous_taxa	SUL				BIC	MIX		MN			0.00701385	0	0	0	0.0210416	0.00350693	0	0.0175346	0
633	2	0	0	0	21	0	0	4	0	D_0__Bacteria; D_1__Firmicutes; D_2__Clostridia; D_3__Clostridiales; D_4__Clostridiaceae 1	SUL				BIC			MN			0.00701385	0	0	0	0.0736454	0	0	0.0140277	0
2479	2	0	0	0	1	4	0	0	0	D_0__Bacteria; D_1__Bacteroidetes; D_2__Bacteroidia; D_3__Bacteroidales; D_4__Dysgonomonadaceae; D_5__Proteiniphilum; Ambiguous_taxa	SUL				BIC	MIX					0.00701385	0	0	0	0.00350693	0.0140277	0	0	0
10437	2	0	1	0	0	0	0	0	0	D_0__Bacteria; D_1__Proteobacteria; D_2__Gammaproteobacteria; D_3__Aeromonadales; D_4__Aeromonadaceae; D_5__Aeromonas	SUL		FE								0.00701385	0	0.00350693	0	0	0	0	0	0
975	2	0	0	0	0	0	0	0	0	D_0__Bacteria; D_1__Bacteroidetes; D_2__Bacteroidia; D_3__Bacteroidales; D_4__Paludibacteraceae; D_5__Paludibacter; Ambiguous_taxa	SUL										0.00701385	0	0	0	0	0	0	0	0
1359	2	0	0	0	0	0	0	0	0	D_0__Bacteria; D_1__Spirochaetes; D_2__Spirochaetia; D_3__Spirochaetales; D_4__Spirochaetaceae; D_5__uncultured	SUL										0.00701385	0	0	0	0	0	0	0	0
1532	2	0	0	0	0	0	0	0	0	D_0__Bacteria; D_1__Firmicutes; D_2__Clostridia; D_3__Clostridiales; D_4__Peptococcaceae; D_5__Desulfotomaculum	SUL										0.00701385	0	0	0	0	0	0	0	0
1644	2	0	0	0	0	0	0	0	0	D_0__Bacteria; D_1__Firmicutes; D_2__Negativicutes; D_3__Selenomonadales; D_4__Veillonellaceae; D_5__Sporomusa	SUL										0.00701385	0	0	0	0	0	0	0	0
1760	2	0	0	0	0	0	0	0	0	D_0__Bacteria; D_1__Firmicutes; D_2__Clostridia; D_3__Clostridiales; D_4__Peptococcaceae; D_5__Desulfosporosinus	SUL										0.00701385	0	0	0	0	0	0	0	0
1907	2	0	0	0	0	0	0	0	0	D_0__Bacteria; D_1__Spirochaetes; D_2__Spirochaetia; D_3__Spirochaetales; D_4__Spirochaetaceae; D_5__uncultured	SUL										0.00701385	0	0	0	0	0	0	0	0
2262	2	0	0	0	0	0	0	0	0	D_0__Bacteria; D_1__Firmicutes; D_2__Negativicutes; D_3__Selenomonadales; D_4__Veillonellaceae; D_5__Anaerospora	SUL										0.00701385	0	0	0	0	0	0	0	0
2534	2	0	0	0	0	0	0	0	0	D_0__Bacteria; D_1__Firmicutes; D_2__Negativicutes; D_3__Selenomonadales; D_4__Veillonellaceae; D_5__Sporomusa; Ambiguous_taxa	SUL										0.00701385	0	0	0	0	0	0	0	0
2966	2	0	0	0	0	0	0	0	0	D_0__Bacteria; D_1__Firmicutes; D_2__Negativicutes; D_3__Selenomonadales; D_4__Veillonellaceae	SUL										0.00701385	0	0	0	0	0	0	0	0
3115	2	0	0	0	0	0	0	0	0	D_0__Bacteria; D_1__Proteobacteria; D_2__Gammaproteobacteria; D_3__Aeromonadales; D_4__Aeromonadaceae; D_5__Aeromonas	SUL										0.00701385	0	0	0	0	0	0	0	0
3157	2	0	0	0	0	0	0	0	0	D_0__Bacteria; D_1__Firmicutes; D_2__Clostridia; D_3__Clostridiales; D_4__Peptococcaceae; D_5__Desulfotomaculum	SUL										0.00701385	0	0	0	0	0	0	0	0
3281	2	0	0	0	0	0	0	0	0	D_0__Bacteria; D_1__Spirochaetes; D_2__Spirochaetia; D_3__Spirochaetales; D_4__Spirochaetaceae; D_5__uncultured	SUL										0.00701385	0	0	0	0	0	0	0	0
3400	2	0	0	0	0	0	0	0	0	D_0__Archaea; D_1__Euryarchaeota; D_2__Methanomicrobia; D_3__Methanosarcinales; D_4__Methanosarcinaceae; D_5__Methanosarcina; D_6__uncultured Methanosarcina sp.	SUL										0.00701385	0	0	0	0	0	0	0	0
3487	2	0	0	0	0	0	0	0	0	D_0__Bacteria; D_1__Spirochaetes; D_2__Spirochaetia; D_3__Spirochaetales; D_4__Spirochaetaceae; D_5__uncultured; Ambiguous_taxa	SUL										0.00701385	0	0	0	0	0	0	0	0
3939	2	0	0	0	0	0	0	0	0	D_0__Bacteria; D_1__Firmicutes; D_2__Clostridia; D_3__Clostridiales; D_4__Peptococcaceae; D_5__Desulfosporosinus	SUL										0.00701385	0	0	0	0	0	0	0	0
4029	2	0	0	0	0	0	0	0	0	D_0__Bacteria; D_1__Spirochaetes; D_2__Spirochaetia; D_3__Spirochaetales; D_4__Spirochaetaceae; D_5__uncultured; Ambiguous_taxa	SUL										0.00701385	0	0	0	0	0	0	0	0
4210	2	0	0	0	0	0	0	0	0	D_0__Bacteria; D_1__Firmicutes; D_2__Clostridia; D_3__Clostridiales; D_4__Peptococcaceae; D_5__Desulfosporosinus	SUL										0.00701385	0	0	0	0	0	0	0	0
4213	2	0	0	0	0	0	0	0	0	D_0__Bacteria; D_1__Firmicutes; D_2__Clostridia; D_3__Clostridiales; D_4__Peptococcaceae; D_5__Desulfosporosinus	SUL										0.00701385	0	0	0	0	0	0	0	0
4514	2	0	0	0	0	0	0	0	0	D_0__Bacteria; D_1__Planctomycetes; D_2__Phycisphaerae; D_3__Pla1 lineage	SUL										0.00701385	0	0	0	0	0	0	0	0
4906	2	0	0	0	0	0	0	0	0	D_0__Bacteria; D_1__Firmicutes; D_2__Clostridia; D_3__Clostridiales; D_4__Peptococcaceae; D_5__Desulfosporosinus; Ambiguous_taxa	SUL										0.00701385	0	0	0	0	0	0	0	0
5200	2	0	0	0	0	0	0	0	0	D_0__Bacteria; D_1__Spirochaetes; D_2__Spirochaetia; D_3__Spirochaetales; D_4__Spirochaetaceae; D_5__uncultured; Ambiguous_taxa	SUL										0.00701385	0	0	0	0	0	0	0	0
5227	2	0	0	0	0	0	0	0	0	D_0__Bacteria; D_1__Firmicutes; D_2__Clostridia; D_3__Clostridiales; D_4__Peptococcaceae; D_5__Desulfotomaculum	SUL										0.00701385	0	0	0	0	0	0	0	0
5851	2	0	0	0	0	0	0	0	0	D_0__Bacteria; D_1__Firmicutes	SUL										0.00701385	0	0	0	0	0	0	0	0
6168	2	0	0	0	0	0	0	0	0	D_0__Bacteria; D_1__Firmicutes; D_2__Clostridia; D_3__Clostridiales; D_4__Peptococcaceae; D_5__Desulfosporosinus	SUL										0.00701385	0	0	0	0	0	0	0	0
6269	2	0	0	0	0	0	0	0	0	D_0__Bacteria; D_1__Firmicutes; D_2__Clostridia; D_3__Clostridiales; D_4__Peptococcaceae; D_5__Desulfosporosinus	SUL										0.00701385	0	0	0	0	0	0	0	0
6986	2	0	0	0	0	0	0	0	0	D_0__Bacteria; D_1__Firmicutes; D_2__Clostridia; D_3__Clostridiales; D_4__Peptococcaceae; D_5__Desulfosporosinus	SUL										0.00701385	0	0	0	0	0	0	0	0
7019	2	0	0	0	0	0	0	0	0	D_0__Bacteria; D_1__Firmicutes; D_2__Clostridia; D_3__Clostridiales; D_4__Gracilibacteraceae; D_5__Lutispora; Ambiguous_taxa	SUL										0.00701385	0	0	0	0	0	0	0	0
7070	2	0	0	0	0	0	0	0	0	D_0__Bacteria	SUL										0.00701385	0	0	0	0	0	0	0	0
7636	2	0	0	0	0	0	0	0	0	D_0__Bacteria; D_1__Firmicutes; D_2__Negativicutes; D_3__Selenomonadales; D_4__Veillonellaceae; D_5__Sporomusa	SUL										0.00701385	0	0	0	0	0	0	0	0
8307	2	0	0	0	0	0	0	0	0	D_0__Bacteria; D_1__Spirochaetes; D_2__Spirochaetia; D_3__Spirochaetales; D_4__Spirochaetaceae; D_5__uncultured; Ambiguous_taxa	SUL										0.00701385	0	0	0	0	0	0	0	0
9335	2	0	0	0	0	0	0	0	0	D_0__Bacteria; D_1__Firmicutes; D_2__Clostridia; D_3__Clostridiales; D_4__Peptococcaceae; D_5__Desulfosporosinus	SUL										0.00701385	0	0	0	0	0	0	0	0
9342	2	0	0	0	0	0	0	0	0	D_0__Bacteria; D_1__Proteobacteria; D_2__Gammaproteobacteria; D_3__Aeromonadales; D_4__Aeromonadaceae; D_5__Aeromonas	SUL										0.00701385	0	0	0	0	0	0	0	0
9473	2	0	0	0	0	0	0	0	0	D_0__Bacteria; D_1__Firmicutes; D_2__Clostridia; D_3__Clostridiales; D_4__Peptococcaceae; D_5__Desulfosporosinus	SUL										0.00701385	0	0	0	0	0	0	0	0
9643	2	0	0	0	0	0	0	0	0	D_0__Bacteria; D_1__Firmicutes; D_2__Clostridia; D_3__Clostridiales; D_4__Peptococcaceae; D_5__Desulfosporosinus	SUL										0.00701385	0	0	0	0	0	0	0	0
8214	1	0	0	25	0	61	0	2	0	D_0__Bacteria; D_1__Proteobacteria; D_2__Gammaproteobacteria; D_3__Betaproteobacteriales; D_4__Rhodocyclaceae	SUL					MIX		MN			0.00350693	0	0	0.0876732	0	0.213922	0	0.00701385	0
3936	1	17	0	22	1	540	12	30	0	D_0__Bacteria; D_1__Proteobacteria; D_2__Gammaproteobacteria; D_3__Betaproteobacteriales; D_4__Rhodocyclaceae	SUL	NT			BIC	MIX		MN			0.00350693	0.0596177	0	0.0771524	0.00350693	1.89374	0.0420831	0.105208	0
1741	1	2	1	17	0	34	0	45	0	D_0__Bacteria; D_1__Proteobacteria; D_2__Gammaproteobacteria; D_3__Betaproteobacteriales; D_4__Rhodocyclaceae	SUL	NT	FE			MIX		MN			0.00350693	0.00701385	0.00350693	0.0596177	0	0.119235	0	0.157812	0
10065	1	4	0	4	0	74	0	11	0	D_0__Bacteria; D_1__Proteobacteria; D_2__Gammaproteobacteria; D_3__Betaproteobacteriales; D_4__Rhodocyclaceae	SUL	NT				MIX		MN			0.00350693	0.0140277	0	0.0140277	0	0.259513	0	0.0385762	0
8902	1	0	107	2	0	0	0	0	0	D_0__Bacteria; D_1__Firmicutes; D_2__Clostridia; D_3__Clostridiales; D_4__Clostridiaceae 1; D_5__Clostridium sensu stricto 1; D_6__Clostridium beijerinckii	SUL		FE								0.00350693	0	0.375241	0.00701385	0	0	0	0	0
264	1	0	0	1	0	0	3	0	0	D_0__Archaea; D_1__Crenarchaeota; D_2__Bathyarchaeia; D_3__uncultured crenarchaeote; D_4__uncultured crenarchaeote; D_5__uncultured crenarchaeote; D_6__uncultured crenarchaeote	SUL										0.00350693	0	0	0.00350693	0	0	0.0105208	0	0
82	1	0	0	0	0	0	0	353	0	D_0__Bacteria; D_1__Spirochaetes; D_2__Spirochaetia; D_3__Spirochaetales; D_4__Spirochaetaceae; D_5__uncultured	SUL							MN			0.00350693	0	0	0	0	0	0	1.23794	0
9586	1	0	0	0	0	0	0	34	0	D_0__Bacteria; D_1__Firmicutes; D_2__Clostridia; D_3__Clostridiales; D_4__Peptostreptococcaceae; D_5__Sporacetigenium; D_6__uncultured bacterium	SUL							MN			0.00350693	0	0	0	0	0	0	0.119235	0
8552	1	0	0	0	0	9	0	12	0	D_0__Bacteria; D_1__Spirochaetes; D_2__Spirochaetia; D_3__Spirochaetales; D_4__Spirochaetaceae; D_5__uncultured; Ambiguous_taxa	SUL					MIX		MN			0.00350693	0	0	0	0	0.0315623	0	0.0420831	0
466	1	0	0	0	1	1	0	9	0	D_0__Bacteria; D_1__Spirochaetes; D_2__Spirochaetia; D_3__Spirochaetales; D_4__Spirochaetaceae; D_5__uncultured; Ambiguous_taxa	SUL				BIC	MIX		MN			0.00350693	0	0	0	0.00350693	0.00350693	0	0.0315623	0
4209	1	0	2	0	0	43	0	7	0	D_0__Bacteria; D_1__Spirochaetes; D_2__Spirochaetia; D_3__Spirochaetales; D_4__Spirochaetaceae; D_5__uncultured; Ambiguous_taxa	SUL		FE			MIX		MN			0.00350693	0	0.00701385	0	0	0.150798	0	0.0245485	0
9884	1	0	0	0	3	2	0	6	0	D_0__Bacteria; D_1__Spirochaetes; D_2__Spirochaetia; D_3__Spirochaetales; D_4__Spirochaetaceae; D_5__uncultured; Ambiguous_taxa	SUL				BIC	MIX		MN			0.00350693	0	0	0	0.0105208	0.00701385	0	0.0210416	0
84	1	0	0	0	0	25	0	2	0	D_0__Bacteria; D_1__Spirochaetes; D_2__Spirochaetia; D_3__Spirochaetales; D_4__Spirochaetaceae; D_5__uncultured; Ambiguous_taxa	SUL					MIX		MN			0.00350693	0	0	0	0	0.0876732	0	0.00701385	0
10652	1	0	0	0	0	0	0	2	0	D_0__Bacteria; D_1__Firmicutes; D_2__Clostridia; D_3__Clostridiales; D_4__Family XIII; D_5__Anaerovorax	SUL							MN			0.00350693	0	0	0	0	0	0	0.00701385	0
279	1	0	0	0	0	0	44	0	0	D_0__Bacteria; D_1__Proteobacteria; D_2__Gammaproteobacteria; D_3__Betaproteobacteriales; D_4__Gallionellaceae	SUL										0.00350693	0	0	0	0	0	0.154305	0	0
3354	1	1	0	0	0	0	0	0	0	D_0__Bacteria; D_1__Bacteroidetes; D_2__Bacteroidia; D_3__Bacteroidales; D_4__Dysgonomonadaceae; D_5__Petrimonas	SUL	NT									0.00350693	0.00350693	0	0	0	0	0	0	0
572	1	0	0	0	0	0	0	0	0	D_0__Bacteria; D_1__Bacteroidetes; D_2__Bacteroidia; D_3__Bacteroidales; D_4__Tannerellaceae; D_5__Macellibacteroides	SUL										0.00350693	0	0	0	0	0	0	0	0
1642	1	0	0	0	0	0	0	0	0	D_0__Bacteria; D_1__Bacteroidetes; D_2__Bacteroidia; D_3__Bacteroidales; D_4__Tannerellaceae; D_5__Macellibacteroides	SUL										0.00350693	0	0	0	0	0	0	0	0
2190	1	0	0	0	0	0	0	0	0	D_0__Bacteria; D_1__Firmicutes; D_2__Clostridia; D_3__Clostridiales; D_4__Christensenellaceae; D_5__uncultured; Ambiguous_taxa	SUL										0.00350693	0	0	0	0	0	0	0	0
2441	1	0	0	0	0	0	0	0	0	D_0__Bacteria; D_1__Proteobacteria; D_2__Gammaproteobacteria; D_3__Alteromonadales; D_4__Alteromonadaceae; D_5__Rheinheimera; Ambiguous_taxa	SUL										0.00350693	0	0	0	0	0	0	0	0
2590	1	0	0	0	0	0	0	0	0	D_0__Bacteria; D_1__Firmicutes; D_2__Erysipelotrichia; D_3__Erysipelotrichales; D_4__Erysipelotrichaceae; D_5__Erysipelothrix	SUL										0.00350693	0	0	0	0	0	0	0	0
3096	1	0	0	0	0	0	0	0	0	D_0__Bacteria; D_1__Bacteroidetes; D_2__Bacteroidia; D_3__Sphingobacteriales	SUL										0.00350693	0	0	0	0	0	0	0	0
3163	1	0	0	0	0	0	0	0	0	D_0__Bacteria; D_1__Firmicutes; D_2__Clostridia; D_3__Clostridiales; D_4__Peptococcaceae; D_5__Desulfosporosinus	SUL										0.00350693	0	0	0	0	0	0	0	0
3296	1	0	0	0	0	0	0	0	0	D_0__Bacteria; D_1__Firmicutes; D_2__Clostridia; D_3__Clostridiales; D_4__Peptococcaceae; D_5__Desulfotomaculum	SUL										0.00350693	0	0	0	0	0	0	0	0
3340	1	0	0	0	0	0	0	0	0	D_0__Bacteria; D_1__Firmicutes; D_2__Clostridia; D_3__Clostridiales; D_4__Peptococcaceae; D_5__Desulfosporosinus	SUL										0.00350693	0	0	0	0	0	0	0	0
3382	1	0	0	0	0	0	0	0	0	D_0__Bacteria; D_1__Bacteroidetes; D_2__Bacteroidia; D_3__Bacteroidales; D_4__Dysgonomonadaceae; D_5__Proteiniphilum	SUL										0.00350693	0	0	0	0	0	0	0	0
3384	1	0	0	0	0	0	0	0	0	D_0__Bacteria; D_1__Firmicutes; D_2__Clostridia; D_3__Clostridiales	SUL										0.00350693	0	0	0	0	0	0	0	0
3435	1	0	0	0	0	0	0	0	0	D_0__Bacteria; D_1__Firmicutes; D_2__Clostridia; D_3__Clostridiales; D_4__Peptococcaceae; D_5__Desulfosporosinus	SUL										0.00350693	0	0	0	0	0	0	0	0
3600	1	0	0	0	0	0	0	0	0	D_0__Bacteria; D_1__Proteobacteria; D_2__Gammaproteobacteria; D_3__Aeromonadales; D_4__Aeromonadaceae; D_5__Aeromonas	SUL										0.00350693	0	0	0	0	0	0	0	0
3745	1	0	0	0	0	0	0	0	0	D_0__Bacteria; D_1__Firmicutes; D_2__Clostridia; D_3__Clostridiales; D_4__Peptococcaceae; D_5__Desulfosporosinus	SUL										0.00350693	0	0	0	0	0	0	0	0
3760	1	0	0	0	0	0	0	0	0	D_0__Bacteria; D_1__Bacteroidetes; D_2__Bacteroidia; D_3__Bacteroidales; D_4__Paludibacteraceae; D_5__Paludibacter	SUL										0.00350693	0	0	0	0	0	0	0	0
3789	1	0	0	0	0	0	0	0	0	D_0__Bacteria; D_1__Proteobacteria; D_2__Gammaproteobacteria; D_3__Aeromonadales; D_4__Aeromonadaceae; D_5__Aeromonas	SUL										0.00350693	0	0	0	0	0	0	0	0
3808	1	0	0	0	0	0	0	0	0	D_0__Archaea; D_1__Euryarchaeota; D_2__Methanomicrobia; D_3__Methanosarcinales; D_4__Methanosarcinaceae; D_5__Methanosarcina	SUL										0.00350693	0	0	0	0	0	0	0	0
3926	1	0	0	0	0	0	0	0	0	D_0__Bacteria; D_1__Proteobacteria; D_2__Gammaproteobacteria; D_3__Aeromonadales; D_4__Aeromonadaceae; D_5__Aeromonas	SUL										0.00350693	0	0	0	0	0	0	0	0
4263	1	0	0	0	0	0	0	0	0	D_0__Bacteria; D_1__Proteobacteria; D_2__Gammaproteobacteria; D_3__Betaproteobacteriales; D_4__Rhodocyclaceae	SUL										0.00350693	0	0	0	0	0	0	0	0
4376	1	0	0	0	0	0	0	0	0	D_0__Bacteria; D_1__Firmicutes; D_2__Clostridia; D_3__Clostridiales; D_4__Peptococcaceae; D_5__Desulfosporosinus	SUL										0.00350693	0	0	0	0	0	0	0	0
4380	1	0	0	0	0	0	0	0	0	D_0__Bacteria; D_1__Firmicutes; D_2__Clostridia; D_3__Clostridiales; D_4__Clostridiaceae 1; D_5__Fonticella; D_6__uncultured bacterium	SUL										0.00350693	0	0	0	0	0	0	0	0
4680	1	0	0	0	0	0	0	0	0	D_0__Bacteria; D_1__Firmicutes; D_2__Negativicutes; D_3__Selenomonadales; D_4__Veillonellaceae; D_5__Anaerospora	SUL										0.00350693	0	0	0	0	0	0	0	0
4832	1	0	0	0	0	0	0	0	0	D_0__Archaea; D_1__Euryarchaeota; D_2__Methanomicrobia; D_3__Methanosarcinales; D_4__Methanosarcinaceae; D_5__Methanosarcina; D_6__uncultured Methanosarcina sp.	SUL										0.00350693	0	0	0	0	0	0	0	0
4959	1	0	0	0	0	0	0	0	0	D_0__Bacteria; D_1__Bacteroidetes; D_2__Bacteroidia; D_3__Bacteroidales; D_4__Tannerellaceae; D_5__Macellibacteroides	SUL										0.00350693	0	0	0	0	0	0	0	0
5080	1	0	0	0	0	0	0	0	0	D_0__Bacteria; D_1__Proteobacteria; D_2__Gammaproteobacteria; D_3__Betaproteobacteriales; D_4__Burkholderiaceae; D_5__Undibacterium; Ambiguous_taxa	SUL										0.00350693	0	0	0	0	0	0	0	0
5100	1	0	0	0	0	0	0	0	0	D_0__Bacteria; D_1__Proteobacteria; D_2__Gammaproteobacteria; D_3__Alteromonadales; D_4__Alteromonadaceae; D_5__Rheinheimera	SUL										0.00350693	0	0	0	0	0	0	0	0
5363	1	0	0	0	0	0	0	0	0	D_0__Bacteria; D_1__Firmicutes; D_2__Clostridia; D_3__Clostridiales; D_4__Syntrophomonadaceae	SUL										0.00350693	0	0	0	0	0	0	0	0
5805	1	0	0	0	0	0	0	0	0	D_0__Bacteria; D_1__Proteobacteria; D_2__Gammaproteobacteria; D_3__Cellvibrionales; D_4__Cellvibrionaceae; D_5__Cellvibrio; D_6__uncultured bacterium	SUL										0.00350693	0	0	0	0	0	0	0	0
5869	1	0	0	0	0	0	0	0	0	D_0__Bacteria; D_1__Firmicutes; D_2__Clostridia; D_3__Clostridiales; D_4__Clostridiaceae 1; D_5__Clostridium sensu stricto 1; D_6__Clostridium beijerinckii	SUL										0.00350693	0	0	0	0	0	0	0	0
5925	1	0	0	0	0	0	0	0	0	D_0__Bacteria; D_1__Firmicutes; D_2__Clostridia; D_3__Clostridiales; D_4__Syntrophomonadaceae	SUL										0.00350693	0	0	0	0	0	0	0	0
6073	1	0	0	0	0	0	0	0	0	D_0__Bacteria; D_1__Spirochaetes; D_2__Spirochaetia; D_3__Spirochaetales; D_4__Spirochaetaceae; D_5__uncultured	SUL										0.00350693	0	0	0	0	0	0	0	0
6131	1	0	0	0	0	0	0	0	0	D_0__Bacteria; D_1__Firmicutes; D_2__Clostridia; D_3__Clostridiales; D_4__Peptococcaceae; D_5__Desulfosporosinus	SUL										0.00350693	0	0	0	0	0	0	0	0
6139	1	0	0	0	0	0	0	0	0	D_0__Bacteria; D_1__Spirochaetes; D_2__Spirochaetia; D_3__Spirochaetales; D_4__Spirochaetaceae; D_5__uncultured	SUL										0.00350693	0	0	0	0	0	0	0	0
6249	1	0	0	0	0	0	0	0	0	D_0__Bacteria; D_1__Firmicutes; D_2__Clostridia; D_3__Clostridiales; D_4__Peptococcaceae; D_5__Desulfosporosinus	SUL										0.00350693	0	0	0	0	0	0	0	0
6469	1	0	0	0	0	0	0	0	0	D_0__Bacteria; D_1__Firmicutes; D_2__Clostridia; D_3__Clostridiales; D_4__Peptococcaceae; D_5__Desulfosporosinus; Ambiguous_taxa	SUL										0.00350693	0	0	0	0	0	0	0	0
6833	1	0	0	0	0	0	0	0	0	D_0__Bacteria; D_1__Proteobacteria; D_2__Gammaproteobacteria; D_3__Aeromonadales; D_4__Aeromonadaceae; D_5__Aeromonas	SUL										0.00350693	0	0	0	0	0	0	0	0
7462	1	0	0	0	0	0	0	0	0	D_0__Bacteria; D_1__Firmicutes; D_2__Clostridia; D_3__Clostridiales; D_4__Peptococcaceae; D_5__Desulfosporosinus	SUL										0.00350693	0	0	0	0	0	0	0	0
7571	1	0	0	0	0	0	0	0	0	D_0__Bacteria; D_1__Firmicutes; D_2__Negativicutes; D_3__Selenomonadales; D_4__Veillonellaceae; D_5__Sporomusa	SUL										0.00350693	0	0	0	0	0	0	0	0
7941	1	0	0	0	0	0	0	0	0	D_0__Bacteria	SUL										0.00350693	0	0	0	0	0	0	0	0
8216	1	0	0	0	0	0	0	0	0	D_0__Bacteria; D_1__Firmicutes	SUL										0.00350693	0	0	0	0	0	0	0	0
8218	1	0	0	0	0	0	0	0	0	D_0__Bacteria; D_1__Spirochaetes; D_2__Spirochaetia; D_3__Spirochaetales; D_4__Spirochaetaceae; D_5__uncultured	SUL										0.00350693	0	0	0	0	0	0	0	0
8788	1	0	0	0	0	0	0	0	0	D_0__Bacteria; D_1__Proteobacteria; D_2__Gammaproteobacteria; D_3__Aeromonadales; D_4__Aeromonadaceae; D_5__Aeromonas	SUL										0.00350693	0	0	0	0	0	0	0	0
9036	1	0	0	0	0	0	0	0	0	D_0__Archaea; D_1__Euryarchaeota; D_2__Methanomicrobia; D_3__Methanosarcinales; D_4__Methanosarcinaceae; D_5__Methanosarcina	SUL										0.00350693	0	0	0	0	0	0	0	0
9080	1	0	0	0	0	0	0	0	0	D_0__Bacteria; D_1__Firmicutes; D_2__Clostridia; D_3__Clostridiales; D_4__Peptococcaceae; D_5__Desulfosporosinus	SUL										0.00350693	0	0	0	0	0	0	0	0
9202	1	0	0	0	0	0	0	0	0	D_0__Bacteria; D_1__Firmicutes	SUL										0.00350693	0	0	0	0	0	0	0	0
9698	1	0	0	0	0	0	0	0	0	D_0__Bacteria; D_1__Firmicutes; D_2__Clostridia; D_3__Clostridiales	SUL										0.00350693	0	0	0	0	0	0	0	0
9763	1	0	0	0	0	0	0	0	0	D_0__Archaea; D_1__Euryarchaeota; D_2__Methanomicrobia; D_3__Methanosarcinales; D_4__Methanosarcinaceae; D_5__Methanosarcina	SUL										0.00350693	0	0	0	0	0	0	0	0
9889	1	0	0	0	0	0	0	0	0	D_0__Bacteria; D_1__Firmicutes; D_2__Clostridia; D_3__Clostridiales; D_4__Peptococcaceae; D_5__Desulfosporosinus	SUL										0.00350693	0	0	0	0	0	0	0	0
9895	1	0	0	0	0	0	0	0	0	D_0__Bacteria; D_1__Bacteroidetes; D_2__Bacteroidia; D_3__Bacteroidales; D_4__Tannerellaceae; D_5__Macellibacteroides	SUL										0.00350693	0	0	0	0	0	0	0	0
10385	1	0	0	0	0	0	0	0	0	D_0__Bacteria; D_1__Bacteroidetes; D_2__Bacteroidia; D_3__Bacteroidales; D_4__Tannerellaceae; D_5__Macellibacteroides	SUL										0.00350693	0	0	0	0	0	0	0	0
10613	1	0	0	0	0	0	0	0	0	D_0__Bacteria; D_1__Proteobacteria; D_2__Alphaproteobacteria; D_3__Rhizobiales; D_4__Pleomorphomonadaceae; D_5__Pleomorphomonas; D_6__uncultured bacterium	SUL										0.00350693	0	0	0	0	0	0	0	0
1028	0	13	0	16043	1	55	358	0	0	D_0__Bacteria; D_1__Deinococcus-Thermus; D_2__Deinococci; D_3__Deinococcales; D_4__Deinococcaceae; D_5__Deinococcus		NT			BIC	MIX					0	0.04559	0	56.2616	0.00350693	0.192881	1.25548	0	0
3711	0	136	15	1954	27	2055	57	263	0	D_0__Bacteria; D_1__Proteobacteria; D_2__Gammaproteobacteria; D_3__Betaproteobacteriales; D_4__Rhodocyclaceae; D_5__Dechloromonas; Ambiguous_taxa		NT	FE		BIC	MIX		MN			0	0.476942	0.0526039	6.85253	0.094687	7.20673	0.199895	0.922322	0
9917	0	0	0	1071	0	4	7	0	0	D_0__Bacteria; D_1__Deinococcus-Thermus; D_2__Deinococci; D_3__Deinococcales; D_4__Deinococcaceae; D_5__Deinococcus						MIX					0	0	0	3.75592	0	0.0140277	0.0245485	0	0
8678	0	0	9902	928	0	0	0	0	15	D_0__Bacteria; D_1__Firmicutes; D_2__Clostridia; D_3__Clostridiales; D_4__Ruminococcaceae; D_5__Ruminiclostridium; D_6__uncultured Firmicutes bacterium			FE						AS3		0	0	34.7256	3.25443	0	0	0	0	0.0526039
3095	0	1	0	763	0	2	13	0	0	D_0__Bacteria; D_1__Deinococcus-Thermus; D_2__Deinococci; D_3__Deinococcales; D_4__Deinococcaceae; D_5__Deinococcus		NT				MIX					0	0.00350693	0	2.67578	0	0.00701385	0.04559	0	0
6145	0	16	1	408	3	424	44	54	0	D_0__Bacteria; D_1__Proteobacteria; D_2__Gammaproteobacteria; D_3__Betaproteobacteriales; D_4__Rhodocyclaceae		NT	FE		BIC	MIX		MN			0	0.0561108	0.00350693	1.43083	0.0105208	1.48694	0.154305	0.189374	0
731	0	0	4895	400	0	0	0	0	18	D_0__Bacteria; D_1__Firmicutes; D_2__Clostridia; D_3__Clostridiales; D_4__Ruminococcaceae; D_5__Ruminiclostridium; D_6__uncultured Firmicutes bacterium			FE						AS3		0	0	17.1664	1.40277	0	0	0	0	0.0631247
5832	0	0	0	370	0	0	9	0	0	D_0__Bacteria; D_1__Deinococcus-Thermus; D_2__Deinococci; D_3__Deinococcales; D_4__Deinococcaceae; D_5__Deinococcus; D_6__Deinococcus enclensis											0	0	0	1.29756	0	0	0.0315623	0	0
1573	0	0	0	272	0	0	3	0	0	D_0__Bacteria; D_1__Deinococcus-Thermus; D_2__Deinococci; D_3__Deinococcales; D_4__Deinococcaceae; D_5__Deinococcus											0	0	0	0.953884	0	0	0.0105208	0	0
8891	0	0	0	246	0	0	11	0	0	D_0__Bacteria; D_1__Deinococcus-Thermus; D_2__Deinococci; D_3__Deinococcales; D_4__Deinococcaceae; D_5__Deinococcus											0	0	0	0.862704	0	0	0.0385762	0	0
10485	0	0	0	240	0	477	0	13	0	D_0__Bacteria; D_1__Acidobacteria; D_2__Holophagae; D_3__Holophagales; D_4__Holophagaceae						MIX		MN			0	0	0	0.841662	0	1.6728	0	0.04559	0
4621	0	2	0	233	0	3	8	0	0	D_0__Bacteria; D_1__Deinococcus-Thermus; D_2__Deinococci; D_3__Deinococcales; D_4__Deinococcaceae; D_5__Deinococcus		NT				MIX					0	0.00701385	0	0.817114	0	0.0105208	0.0280554	0	0
8780	0	0	0	188	0	0	2	0	0	D_0__Bacteria; D_1__Deinococcus-Thermus; D_2__Deinococci; D_3__Deinococcales; D_4__Deinococcaceae; D_5__Deinococcus											0	0	0	0.659302	0	0	0.00701385	0	0
4061	0	0	0	176	0	0	2	0	0	D_0__Bacteria; D_1__Deinococcus-Thermus; D_2__Deinococci; D_3__Deinococcales; D_4__Deinococcaceae; D_5__Deinococcus; D_6__Deinococcus enclensis											0	0	0	0.617219	0	0	0.00701385	0	0
5746	0	0	0	171	0	0	29	0	0	D_0__Bacteria; D_1__Proteobacteria; D_2__Gammaproteobacteria; D_3__Betaproteobacteriales; D_4__Rhodocyclaceae											0	0	0	0.599684	0	0	0.101701	0	0
41	0	0	1351	149	0	0	0	0	6	D_0__Bacteria; D_1__Acidobacteria; D_2__Acidobacteriia; D_3__Solibacterales; D_4__Solibacteraceae (Subgroup 3)			FE						AS3		0	0	4.73786	0.522532	0	0	0	0	0.0210416
644	0	0	0	144	0	1	3	0	0	D_0__Bacteria; D_1__Deinococcus-Thermus; D_2__Deinococci; D_3__Deinococcales; D_4__Deinococcaceae; D_5__Deinococcus						MIX					0	0	0	0.504997	0	0.00350693	0.0105208	0	0
8398	0	15	1	128	0	389	1	9	0	D_0__Bacteria; D_1__Proteobacteria; D_2__Gammaproteobacteria; D_3__Betaproteobacteriales; D_4__Rhodocyclaceae		NT	FE			MIX		MN			0	0.0526039	0.00350693	0.448887	0	1.36419	0.00350693	0.0315623	0
4617	0	0	0	123	0	0	3	0	0	D_0__Bacteria; D_1__Deinococcus-Thermus; D_2__Deinococci; D_3__Deinococcales; D_4__Deinococcaceae; D_5__Deinococcus											0	0	0	0.431352	0	0	0.0105208	0	0
1693	0	0	2767	102	0	0	0	0	2	D_0__Bacteria; D_1__Acidobacteria; D_2__Acidobacteriia; D_3__Acidobacteriales; D_4__Acidobacteriaceae (Subgroup 1); Ambiguous_taxa; Ambiguous_taxa			FE						AS3		0	0	9.70366	0.357706	0	0	0	0	0.00701385
8747	0	111	14	99	1	3161	8	68	1	D_0__Bacteria; D_1__Proteobacteria; D_2__Gammaproteobacteria; D_3__Betaproteobacteriales; D_4__Rhodocyclaceae; D_5__Dechloromonas; Ambiguous_taxa		NT	FE		BIC	MIX		MN	AS3		0	0.389269	0.049097	0.347186	0.00350693	11.0854	0.0280554	0.238471	0.00350693
2267	0	8	1	97	0	85	4	10	0	D_0__Bacteria; D_1__Proteobacteria; D_2__Gammaproteobacteria; D_3__Betaproteobacteriales; D_4__Rhodocyclaceae		NT	FE			MIX		MN			0	0.0280554	0.00350693	0.340172	0	0.298089	0.0140277	0.0350693	0
6085	0	0	0	90	0	0	3	0	0	D_0__Bacteria; D_1__Deinococcus-Thermus; D_2__Deinococci; D_3__Deinococcales; D_4__Deinococcaceae; D_5__Deinococcus											0	0	0	0.315623	0	0	0.0105208	0	0
12	0	0	0	86	0	6	7	0	0	D_0__Bacteria; D_1__Deinococcus-Thermus; D_2__Deinococci; D_3__Deinococcales; D_4__Deinococcaceae; D_5__Deinococcus						MIX					0	0	0	0.301596	0	0.0210416	0.0245485	0	0
10452	0	61	23	67	1	1536	5	39	0	D_0__Bacteria; D_1__Proteobacteria; D_2__Gammaproteobacteria; D_3__Betaproteobacteriales; D_4__Rhodocyclaceae		NT	FE		BIC	MIX		MN			0	0.213922	0.0806593	0.234964	0.00350693	5.38664	0.0175346	0.13677	0
6	0	4	0	66	3	77	12	21	0	D_0__Bacteria; D_1__Proteobacteria; D_2__Gammaproteobacteria; D_3__Betaproteobacteriales; D_4__Rhodocyclaceae		NT			BIC	MIX		MN			0	0.0140277	0	0.231457	0.0105208	0.270033	0.0420831	0.0736454	0
9839	0	0	0	62	0	0	1	0	0	D_0__Bacteria; D_1__Deinococcus-Thermus; D_2__Deinococci; D_3__Deinococcales; D_4__Deinococcaceae; D_5__Deinococcus											0	0	0	0.217429	0	0	0.00350693	0	0
61	0	0	0	57	0	85	0	5	0	D_0__Bacteria; D_1__Acidobacteria; D_2__Holophagae; D_3__Holophagales; D_4__Holophagaceae						MIX		MN			0	0	0	0.199895	0	0.298089	0	0.0175346	0
5051	0	4	0	56	0	49	0	39	0	D_0__Bacteria; D_1__Proteobacteria; D_2__Gammaproteobacteria; D_3__Betaproteobacteriales; D_4__Rhodocyclaceae		NT				MIX		MN			0	0.0140277	0	0.196388	0	0.171839	0	0.13677	0
6089	0	0	0	51	0	0	8	0	0	D_0__Bacteria; D_1__Proteobacteria; D_2__Gammaproteobacteria; D_3__Betaproteobacteriales; D_4__Rhodocyclaceae											0	0	0	0.178853	0	0	0.0280554	0	0
1553	0	0	0	50	0	0	1	0	0	D_0__Bacteria; D_1__Deinococcus-Thermus; D_2__Deinococci; D_3__Deinococcales; D_4__Deinococcaceae; D_5__Deinococcus											0	0	0	0.175346	0	0	0.00350693	0	0
9604	0	0	0	49	0	0	2	0	0	D_0__Bacteria; D_1__Deinococcus-Thermus; D_2__Deinococci; D_3__Deinococcales; D_4__Deinococcaceae; D_5__Deinococcus											0	0	0	0.171839	0	0	0.00701385	0	0
4895	0	0	0	48	0	0	0	0	0	D_0__Bacteria; D_1__Deinococcus-Thermus; D_2__Deinococci; D_3__Deinococcales; D_4__Deinococcaceae; D_5__Deinococcus											0	0	0	0.168332	0	0	0	0	0
10463	0	0	0	47	0	0	0	0	0	D_0__Bacteria; D_1__Deinococcus-Thermus; D_2__Deinococci; D_3__Deinococcales; D_4__Deinococcaceae; D_5__Deinococcus; D_6__Deinococcus enclensis											0	0	0	0.164826	0	0	0	0	0
10481	0	1	0	46	0	28	1	5	0	D_0__Bacteria; D_1__Proteobacteria; D_2__Gammaproteobacteria; D_3__Betaproteobacteriales; D_4__Rhodocyclaceae		NT				MIX		MN			0	0.00350693	0	0.161319	0	0.0981939	0.00350693	0.0175346	0
49	0	0	1214	44	0	0	0	0	2	D_0__Bacteria; D_1__Firmicutes; D_2__Clostridia; D_3__Clostridiales; D_4__Peptococcaceae; D_5__Thermincola			FE						AS3		0	0	4.25741	0.154305	0	0	0	0	0.00701385
9364	0	18	6	43	0	713	6	20	0	D_0__Bacteria; D_1__Proteobacteria; D_2__Gammaproteobacteria; D_3__Betaproteobacteriales; D_4__Rhodocyclaceae; D_5__Dechloromonas; Ambiguous_taxa		NT	FE			MIX		MN			0	0.0631247	0.0210416	0.150798	0	2.50044	0.0210416	0.0701385	0
172	0	2	0	42	0	72	2	7	0	D_0__Bacteria; D_1__Proteobacteria; D_2__Gammaproteobacteria; D_3__Betaproteobacteriales; D_4__Rhodocyclaceae; D_5__Dechloromonas; Ambiguous_taxa		NT				MIX		MN			0	0.00701385	0	0.147291	0	0.252499	0.00701385	0.0245485	0
9219	0	0	624	39	0	0	0	0	2	D_0__Bacteria; D_1__Firmicutes; D_2__Clostridia; D_3__Clostridiales; D_4__Ruminococcaceae; D_5__Ruminiclostridium; D_6__uncultured Firmicutes bacterium			FE						AS3		0	0	2.18832	0.13677	0	0	0	0	0.00701385
7327	0	50	0	39	0	108	7	4	0	D_0__Bacteria; D_1__Proteobacteria; D_2__Gammaproteobacteria; D_3__Betaproteobacteriales; D_4__Rhodocyclaceae		NT				MIX		MN			0	0.175346	0	0.13677	0	0.378748	0.0245485	0.0140277	0
8816	0	0	0	39	0	0	1	0	0	D_0__Bacteria; D_1__Deinococcus-Thermus; D_2__Deinococci; D_3__Deinococcales; D_4__Deinococcaceae; D_5__Deinococcus											0	0	0	0.13677	0	0	0.00350693	0	0
1464	0	0	0	35	1	33	5	6	0	D_0__Bacteria; D_1__Proteobacteria; D_2__Gammaproteobacteria; D_3__Betaproteobacteriales; D_4__Rhodocyclaceae					BIC	MIX		MN			0	0	0	0.122742	0.00350693	0.115729	0.0175346	0.0210416	0
2011	0	0	0	33	0	41	0	3	0	D_0__Bacteria; D_1__Acidobacteria; D_2__Holophagae; D_3__Holophagales; D_4__Holophagaceae						MIX		MN			0	0	0	0.115729	0	0.143784	0	0.0105208	0
6302	0	4	0	33	1	17	5	1	0	D_0__Bacteria; D_1__Proteobacteria; D_2__Gammaproteobacteria; D_3__Betaproteobacteriales; D_4__Rhodocyclaceae		NT			BIC	MIX		MN			0	0.0140277	0	0.115729	0.00350693	0.0596177	0.0175346	0.00350693	0
4630	0	0	0	30	0	0	0	0	0	D_0__Bacteria; D_1__Deinococcus-Thermus; D_2__Deinococci; D_3__Deinococcales; D_4__Deinococcaceae; D_5__Deinococcus; D_6__Deinococcus enclensis											0	0	0	0.105208	0	0	0	0	0
691	0	0	0	28	0	22	0	0	0	D_0__Bacteria; D_1__Acidobacteria; D_2__Holophagae; D_3__Holophagales; D_4__Holophagaceae						MIX					0	0	0	0.0981939	0	0.0771524	0	0	0
3263	0	3	0	27	2	17	7	4	0	D_0__Bacteria; D_1__Proteobacteria; D_2__Gammaproteobacteria; D_3__Betaproteobacteriales; D_4__Rhodocyclaceae		NT			BIC	MIX		MN			0	0.0105208	0	0.094687	0.00701385	0.0596177	0.0245485	0.0140277	0
8952	0	1	0	27	0	0	0	0	0	D_0__Bacteria; D_1__Deinococcus-Thermus; D_2__Deinococci; D_3__Deinococcales; D_4__Deinococcaceae; D_5__Deinococcus; D_6__Deinococcus enclensis		NT									0	0.00350693	0	0.094687	0	0	0	0	0
10488	0	0	0	26	0	0	6	0	0	D_0__Bacteria; D_1__Deinococcus-Thermus; D_2__Deinococci; D_3__Deinococcales; D_4__Deinococcaceae; D_5__Deinococcus; D_6__Deinococcus enclensis											0	0	0	0.0911801	0	0	0.0210416	0	0
8261	0	0	0	26	0	0	1	0	0	D_0__Bacteria; D_1__Deinococcus-Thermus; D_2__Deinococci; D_3__Deinococcales; D_4__Deinococcaceae; D_5__Deinococcus; D_6__Deinococcus enclensis											0	0	0	0.0911801	0	0	0.00350693	0	0
6279	0	0	0	26	0	41	0	0	0	D_0__Bacteria; D_1__Acidobacteria; D_2__Holophagae; D_3__Holophagales; D_4__Holophagaceae						MIX					0	0	0	0.0911801	0	0.143784	0	0	0
10626	0	0	274	26	0	0	0	0	0	D_0__Bacteria; D_1__Firmicutes; D_2__Clostridia; D_3__Clostridiales; D_4__Ruminococcaceae			FE								0	0	0.960898	0.0911801	0	0	0	0	0
3862	0	0	0	25	0	0	1	0	0	D_0__Bacteria; D_1__Deinococcus-Thermus; D_2__Deinococci; D_3__Deinococcales; D_4__Deinococcaceae; D_5__Deinococcus											0	0	0	0.0876732	0	0	0.00350693	0	0
8445	0	1	1	23	2	27	14	1	0	D_0__Bacteria; D_1__Proteobacteria; D_2__Gammaproteobacteria; D_3__Betaproteobacteriales; D_4__Rhodocyclaceae		NT	FE		BIC	MIX		MN			0	0.00350693	0.00350693	0.0806593	0.00701385	0.094687	0.049097	0.00350693	0
383	0	0	0	23	0	0	1	0	0	D_0__Bacteria; D_1__Deinococcus-Thermus; D_2__Deinococci; D_3__Deinococcales; D_4__Deinococcaceae; D_5__Deinococcus											0	0	0	0.0806593	0	0	0.00350693	0	0
2401	0	1	0	22	0	18	0	4	0	D_0__Bacteria; D_1__Proteobacteria; D_2__Gammaproteobacteria; D_3__Betaproteobacteriales; D_4__Rhodocyclaceae		NT				MIX		MN			0	0.00350693	0	0.0771524	0	0.0631247	0	0.0140277	0
4901	0	1	0	21	1	9	0	2	0	D_0__Bacteria; D_1__Proteobacteria; D_2__Gammaproteobacteria; D_3__Betaproteobacteriales; D_4__Rhodocyclaceae		NT			BIC	MIX		MN			0	0.00350693	0	0.0736454	0.00350693	0.0315623	0	0.00701385	0
1129	0	0	0	21	0	37	0	0	0	D_0__Bacteria; D_1__Acidobacteria; D_2__Holophagae; D_3__Holophagales; D_4__Holophagaceae						MIX					0	0	0	0.0736454	0	0.129756	0	0	0
4974	0	0	0	20	4	18	7	2	0	D_0__Bacteria; D_1__Proteobacteria; D_2__Gammaproteobacteria; D_3__Betaproteobacteriales; D_4__Rhodocyclaceae					BIC	MIX		MN			0	0	0	0.0701385	0.0140277	0.0631247	0.0245485	0.00701385	0
1706	0	0	2	19	0	28	0	4	0	D_0__Bacteria; D_1__Proteobacteria; D_2__Gammaproteobacteria; D_3__Betaproteobacteriales; D_4__Rhodocyclaceae			FE			MIX		MN			0	0	0.00701385	0.0666316	0	0.0981939	0	0.0140277	0
9929	0	0	0	19	24	0	143	0	0	D_0__Bacteria; D_1__Proteobacteria; D_2__Gammaproteobacteria; D_3__Betaproteobacteriales; D_4__Burkholderiaceae; D_5__Rhizobacter; Ambiguous_taxa					BIC						0	0	0	0.0666316	0.0841662	0	0.50149	0	0
0	0	0	163	18	0	0	0	0	0	D_0__Bacteria; D_1__Firmicutes; D_2__Clostridia; D_3__Clostridiales; D_4__Ruminococcaceae; D_5__Ruminiclostridium			FE								0	0	0.571629	0.0631247	0	0	0	0	0
126	0	0	0	17	0	0	45	0	0	D_0__Bacteria											0	0	0	0.0596177	0	0	0.157812	0	0
238	0	0	0	17	0	0	0	0	0	D_0__Bacteria; D_1__Deinococcus-Thermus; D_2__Deinococci; D_3__Deinococcales; D_4__Deinococcaceae; D_5__Deinococcus											0	0	0	0.0596177	0	0	0	0	0
9641	0	0	0	16	0	0	1	0	0	D_0__Bacteria; D_1__Deinococcus-Thermus; D_2__Deinococci; D_3__Deinococcales; D_4__Deinococcaceae; D_5__Deinococcus; Ambiguous_taxa											0	0	0	0.0561108	0	0	0.00350693	0	0
860	0	0	181	16	0	0	0	0	0	D_0__Bacteria; D_1__Firmicutes; D_2__Clostridia; D_3__Clostridiales; D_4__Ruminococcaceae; D_5__Ruminiclostridium; D_6__uncultured Firmicutes bacterium			FE								0	0	0.634754	0.0561108	0	0	0	0	0
5829	0	0	99	16	0	0	0	0	0	D_0__Bacteria; D_1__Firmicutes; D_2__Clostridia; D_3__Clostridiales; D_4__Ruminococcaceae; D_5__Ruminiclostridium; D_6__uncultured Firmicutes bacterium			FE								0	0	0.347186	0.0561108	0	0	0	0	0
1616	0	1	0	16	0	0	0	0	0	D_0__Bacteria; D_1__Deinococcus-Thermus; D_2__Deinococci; D_3__Deinococcales; D_4__Deinococcaceae; D_5__Deinococcus; D_6__Deinococcus enclensis		NT									0	0.00350693	0	0.0561108	0	0	0	0	0
488	0	0	0	16	0	0	0	0	0	D_0__Bacteria; D_1__Deinococcus-Thermus; D_2__Deinococci; D_3__Deinococcales; D_4__Deinococcaceae; D_5__Deinococcus											0	0	0	0.0561108	0	0	0	0	0
4556	0	0	106	15	0	0	0	0	1	D_0__Bacteria; D_1__Firmicutes; D_2__Clostridia; D_3__Clostridiales; D_4__Ruminococcaceae; D_5__Ruminiclostridium; D_6__uncultured Firmicutes bacterium			FE						AS3		0	0	0.371734	0.0526039	0	0	0	0	0.00350693
5562	0	2	0	15	0	12	2	7	0	D_0__Bacteria; D_1__Proteobacteria; D_2__Gammaproteobacteria; D_3__Betaproteobacteriales; D_4__Rhodocyclaceae		NT				MIX		MN			0	0.00701385	0	0.0526039	0	0.0420831	0.00701385	0.0245485	0
9950	0	2	0	15	2	55	1	5	0	D_0__Bacteria; D_1__Proteobacteria; D_2__Gammaproteobacteria; D_3__Betaproteobacteriales; D_4__Rhodocyclaceae		NT			BIC	MIX		MN			0	0.00701385	0	0.0526039	0.00701385	0.192881	0.00350693	0.0175346	0
1715	0	0	0	15	0	0	0	0	0	D_0__Bacteria; D_1__Deinococcus-Thermus; D_2__Deinococci; D_3__Deinococcales; D_4__Deinococcaceae; D_5__Deinococcus; D_6__Deinococcus enclensis											0	0	0	0.0526039	0	0	0	0	0
111	0	0	187	14	0	0	0	0	1	D_0__Bacteria; D_1__Acidobacteria; D_2__Acidobacteriia; D_3__Solibacterales; D_4__Solibacteraceae (Subgroup 3)			FE						AS3		0	0	0.655795	0.049097	0	0	0	0	0.00350693
77	0	1	0	14	0	0	3	0	0	D_0__Bacteria; D_1__Proteobacteria; D_2__Gammaproteobacteria; D_3__Betaproteobacteriales; D_4__Rhodocyclaceae		NT									0	0.00350693	0	0.049097	0	0	0.0105208	0	0
8607	0	0	0	14	0	12	0	0	0	D_0__Bacteria; D_1__Acidobacteria; D_2__Holophagae; D_3__Holophagales; D_4__Holophagaceae						MIX					0	0	0	0.049097	0	0.0420831	0	0	0
8568	0	1	0	14	0	9	0	0	0	D_0__Bacteria; D_1__Proteobacteria; D_2__Gammaproteobacteria; D_3__Betaproteobacteriales; D_4__Rhodocyclaceae		NT				MIX					0	0.00350693	0	0.049097	0	0.0315623	0	0	0
9593	0	0	524	13	0	0	0	0	5	D_0__Bacteria; D_1__Acidobacteria; D_2__Acidobacteriia; D_3__Acidobacteriales; D_4__Acidobacteriaceae (Subgroup 1)			FE						AS3		0	0	1.83763	0.04559	0	0	0	0	0.0175346
7074	0	0	0	13	0	6	1	0	0	D_0__Bacteria; D_1__Proteobacteria; D_2__Gammaproteobacteria; D_3__Betaproteobacteriales; D_4__Rhodocyclaceae						MIX					0	0	0	0.04559	0	0.0210416	0.00350693	0	0
7705	0	0	0	13	0	0	1	0	0	D_0__Bacteria; D_1__Deinococcus-Thermus; D_2__Deinococci; D_3__Deinococcales; D_4__Deinococcaceae; D_5__Deinococcus; D_6__Deinococcus enclensis											0	0	0	0.04559	0	0	0.00350693	0	0
6206	0	2	0	12	0	50	0	1	0	D_0__Bacteria; D_1__Proteobacteria; D_2__Gammaproteobacteria; D_3__Betaproteobacteriales; D_4__Rhodocyclaceae		NT				MIX		MN			0	0.00701385	0	0.0420831	0	0.175346	0	0.00350693	0
4927	0	0	0	12	0	0	48	0	0	D_0__Bacteria; D_1__Proteobacteria; D_2__Gammaproteobacteria; D_3__Betaproteobacteriales; D_4__Burkholderiaceae; D_5__Rhizobacter; Ambiguous_taxa											0	0	0	0.0420831	0	0	0.168332	0	0
2589	0	0	0	12	0	0	0	0	0	D_0__Bacteria; D_1__Deinococcus-Thermus; D_2__Deinococci; D_3__Deinococcales; D_4__Deinococcaceae; D_5__Deinococcus; D_6__Deinococcus enclensis											0	0	0	0.0420831	0	0	0	0	0
3538	0	17	3	11	0	427	3	7	0	D_0__Bacteria; D_1__Proteobacteria; D_2__Gammaproteobacteria; D_3__Betaproteobacteriales; D_4__Rhodocyclaceae; D_5__Dechloromonas; Ambiguous_taxa		NT	FE			MIX		MN			0	0.0596177	0.0105208	0.0385762	0	1.49746	0.0105208	0.0245485	0
6326	0	0	0	11	10	1	10	0	0	D_0__Bacteria; D_1__Proteobacteria; D_2__Gammaproteobacteria; D_3__Betaproteobacteriales					BIC	MIX					0	0	0	0.0385762	0.0350693	0.00350693	0.0350693	0	0
10439	0	0	0	11	0	0	2	0	0	D_0__Bacteria; D_1__Deinococcus-Thermus; D_2__Deinococci; D_3__Deinococcales; D_4__Deinococcaceae; D_5__Deinococcus; D_6__Deinococcus enclensis											0	0	0	0.0385762	0	0	0.00701385	0	0
5908	0	0	0	11	0	0	1	0	0	D_0__Bacteria; D_1__Deinococcus-Thermus; D_2__Deinococci; D_3__Deinococcales; D_4__Deinococcaceae; D_5__Deinococcus											0	0	0	0.0385762	0	0	0.00350693	0	0
8806	0	0	0	11	0	12	0	0	0	D_0__Bacteria; D_1__Proteobacteria; D_2__Gammaproteobacteria; D_3__Betaproteobacteriales; D_4__Rhodocyclaceae						MIX					0	0	0	0.0385762	0	0.0420831	0	0	0
8565	0	0	132	11	0	0	0	0	0	D_0__Bacteria; D_1__Firmicutes; D_2__Clostridia; D_3__Clostridiales; D_4__Ruminococcaceae; D_5__Ruminiclostridium; D_6__uncultured Firmicutes bacterium			FE								0	0	0.462914	0.0385762	0	0	0	0	0
677	0	0	0	11	0	0	0	0	0	D_0__Bacteria; D_1__Deinococcus-Thermus; D_2__Deinococci; D_3__Deinococcales; D_4__Deinococcaceae; D_5__Deinococcus; D_6__Deinococcus enclensis											0	0	0	0.0385762	0	0	0	0	0
1205	0	0	0	11	0	0	0	0	0	D_0__Bacteria; D_1__Deinococcus-Thermus; D_2__Deinococci; D_3__Deinococcales; D_4__Deinococcaceae; D_5__Deinococcus											0	0	0	0.0385762	0	0	0	0	0
2760	0	0	0	11	0	0	0	0	0	D_0__Bacteria; D_1__Deinococcus-Thermus; D_2__Deinococci; D_3__Deinococcales; D_4__Deinococcaceae; D_5__Deinococcus											0	0	0	0.0385762	0	0	0	0	0
5668	0	0	0	11	0	0	0	0	0	D_0__Bacteria; D_1__Proteobacteria; D_2__Gammaproteobacteria; D_3__Betaproteobacteriales; D_4__Rhodocyclaceae											0	0	0	0.0385762	0	0	0	0	0
6645	0	0	0	10	10	0	100	0	0	D_0__Bacteria; D_1__Proteobacteria; D_2__Gammaproteobacteria; D_3__Betaproteobacteriales; D_4__Burkholderiaceae; D_5__Rhizobacter; Ambiguous_taxa					BIC						0	0	0	0.0350693	0.0350693	0	0.350693	0	0
4836	0	1	48	10	0	0	0	0	0	D_0__Bacteria; D_1__Acidobacteria; D_2__Acidobacteriia; D_3__Solibacterales; D_4__Solibacteraceae (Subgroup 3)		NT	FE								0	0.00350693	0.168332	0.0350693	0	0	0	0	0
6275	0	0	0	9	1	14	1	1	0	D_0__Bacteria; D_1__Proteobacteria; D_2__Gammaproteobacteria; D_3__Betaproteobacteriales; D_4__Rhodocyclaceae					BIC	MIX		MN			0	0	0	0.0315623	0.00350693	0.049097	0.00350693	0.00350693	0
9107	0	0	0	9	0	0	1	0	0	D_0__Bacteria; D_1__Deinococcus-Thermus; D_2__Deinococci; D_3__Deinococcales; D_4__Deinococcaceae; D_5__Deinococcus; D_6__Deinococcus enclensis											0	0	0	0.0315623	0	0	0.00350693	0	0
10541	0	0	86	9	0	0	0	0	0	D_0__Bacteria; D_1__Firmicutes; D_2__Clostridia; D_3__Clostridiales; D_4__Ruminococcaceae; D_5__Ruminiclostridium; D_6__uncultured Firmicutes bacterium			FE								0	0	0.301596	0.0315623	0	0	0	0	0
2840	0	0	0	9	0	0	0	0	0	D_0__Bacteria; D_1__Deinococcus-Thermus; D_2__Deinococci; D_3__Deinococcales; D_4__Deinococcaceae; D_5__Deinococcus; D_6__Deinococcus enclensis											0	0	0	0.0315623	0	0	0	0	0
10458	0	0	0	9	0	0	0	0	0	D_0__Bacteria; D_1__Deinococcus-Thermus; D_2__Deinococci; D_3__Deinococcales; D_4__Deinococcaceae; D_5__Deinococcus; D_6__Deinococcus enclensis											0	0	0	0.0315623	0	0	0	0	0
2523	0	9	2	8	0	186	6	8	0	D_0__Bacteria; D_1__Proteobacteria; D_2__Gammaproteobacteria; D_3__Betaproteobacteriales; D_4__Rhodocyclaceae		NT	FE			MIX		MN			0	0.0315623	0.00701385	0.0280554	0	0.652288	0.0210416	0.0280554	0
1442	0	6	1	8	0	93	1	2	0	D_0__Bacteria; D_1__Proteobacteria; D_2__Gammaproteobacteria; D_3__Betaproteobacteriales; D_4__Rhodocyclaceae		NT	FE			MIX		MN			0	0.0210416	0.00350693	0.0280554	0	0.326144	0.00350693	0.00701385	0
4020	0	0	0	8	0	9	0	2	0	D_0__Bacteria; D_1__Proteobacteria; D_2__Gammaproteobacteria; D_3__Betaproteobacteriales; D_4__Rhodocyclaceae						MIX		MN			0	0	0	0.0280554	0	0.0315623	0	0.00701385	0
7695	0	0	0	8	0	8	0	1	0	D_0__Bacteria; D_1__Proteobacteria; D_2__Gammaproteobacteria; D_3__Betaproteobacteriales; D_4__Rhodocyclaceae; D_5__Dechloromonas; Ambiguous_taxa						MIX		MN			0	0	0	0.0280554	0	0.0280554	0	0.00350693	0
4804	0	1	0	8	16	0	21	0	0	D_0__Bacteria; D_1__Proteobacteria; D_2__Gammaproteobacteria; D_3__Betaproteobacteriales; D_4__Burkholderiaceae; D_5__Rhizobacter; Ambiguous_taxa		NT			BIC						0	0.00350693	0	0.0280554	0.0561108	0	0.0736454	0	0
1786	0	0	83	8	0	0	0	0	0	D_0__Bacteria; D_1__Acidobacteria; D_2__Acidobacteriia; D_3__Acidobacteriales; D_4__Acidobacteriaceae (Subgroup 1); Ambiguous_taxa; Ambiguous_taxa			FE								0	0	0.291075	0.0280554	0	0	0	0	0
358	0	0	23	8	0	0	0	0	0	D_0__Bacteria; D_1__WPS-2; Ambiguous_taxa; Ambiguous_taxa; Ambiguous_taxa; Ambiguous_taxa; Ambiguous_taxa			FE								0	0	0.0806593	0.0280554	0	0	0	0	0
8762	0	0	0	8	0	0	0	0	0	D_0__Bacteria; D_1__Deinococcus-Thermus; D_2__Deinococci; D_3__Deinococcales; D_4__Deinococcaceae; D_5__Deinococcus											0	0	0	0.0280554	0	0	0	0	0
4372	0	0	0	7	0	6	23	23	0	D_0__Bacteria; D_1__Proteobacteria; D_2__Alphaproteobacteria; D_3__Rhizobiales; D_4__Pleomorphomonadaceae; D_5__uncultured; Ambiguous_taxa						MIX		MN			0	0	0	0.0245485	0	0.0210416	0.0806593	0.0806593	0
1635	0	0	0	7	0	1	1	10	0	D_0__Bacteria; D_1__Proteobacteria; D_2__Alphaproteobacteria; D_3__Rhizobiales; D_4__Pleomorphomonadaceae; D_5__uncultured; Ambiguous_taxa						MIX		MN			0	0	0	0.0245485	0	0.00350693	0.00350693	0.0350693	0
5916	0	19	0	7	0	955	1	3	0	D_0__Bacteria; D_1__Bacteroidetes; D_2__Ignavibacteria; D_3__Ignavibacteriales; D_4__SR-FBR-L83		NT				MIX		MN			0	0.0666316	0	0.0245485	0	3.34911	0.00350693	0.0105208	0
10572	0	3	0	7	0	10	1	2	0	D_0__Bacteria; D_1__Proteobacteria; D_2__Gammaproteobacteria; D_3__Betaproteobacteriales; D_4__Rhodocyclaceae		NT				MIX		MN			0	0.0105208	0	0.0245485	0	0.0350693	0.00350693	0.00701385	0
1224	0	0	0	7	0	12	0	0	0	D_0__Bacteria; D_1__Acidobacteria; D_2__Holophagae; D_3__Holophagales; D_4__Holophagaceae						MIX					0	0	0	0.0245485	0	0.0420831	0	0	0
4153	0	0	50	7	0	0	0	0	0	D_0__Bacteria; D_1__Firmicutes; D_2__Clostridia; D_3__Clostridiales; D_4__Ruminococcaceae; D_5__Ruminiclostridium; D_6__uncultured Firmicutes bacterium			FE								0	0	0.175346	0.0245485	0	0	0	0	0
3800	0	0	0	7	0	0	0	0	0	D_0__Bacteria; D_1__Deinococcus-Thermus; D_2__Deinococci; D_3__Deinococcales; D_4__Deinococcaceae; D_5__Deinococcus; D_6__Deinococcus enclensis											0	0	0	0.0245485	0	0	0	0	0
10538	0	5	0	6	0	37	2	2483	0	D_0__Bacteria; D_1__Proteobacteria; D_2__Gammaproteobacteria; D_3__Betaproteobacteriales; D_4__Rhodocyclaceae; D_5__Dechloromonas; Ambiguous_taxa		NT				MIX		MN			0	0.0175346	0	0.0210416	0	0.129756	0.00701385	8.7077	0
7443	0	0	1	6	0	32	0	12	0	D_0__Bacteria; D_1__Proteobacteria; D_2__Gammaproteobacteria; D_3__Betaproteobacteriales; D_4__Rhodocyclaceae			FE			MIX		MN			0	0	0.00350693	0.0210416	0	0.112222	0	0.0420831	0
8634	0	3	0	6	0	1	6	5	0	D_0__Bacteria; D_1__Proteobacteria; D_2__Gammaproteobacteria; D_3__Betaproteobacteriales; D_4__Rhodocyclaceae		NT				MIX		MN			0	0.0105208	0	0.0210416	0	0.00350693	0.0210416	0.0175346	0
1131	0	0	0	6	0	9	1	1	0	D_0__Bacteria; D_1__Proteobacteria; D_2__Gammaproteobacteria; D_3__Betaproteobacteriales; D_4__Rhodocyclaceae						MIX		MN			0	0	0	0.0210416	0	0.0315623	0.00350693	0.00350693	0
411	0	0	0	6	0	13	0	1	0	D_0__Bacteria; D_1__Acidobacteria; D_2__Holophagae; D_3__Holophagales; D_4__Holophagaceae						MIX		MN			0	0	0	0.0210416	0	0.04559	0	0.00350693	0
7161	0	0	0	6	4	0	42	0	0	D_0__Bacteria; D_1__Proteobacteria; D_2__Gammaproteobacteria; D_3__Betaproteobacteriales; D_4__Burkholderiaceae; D_5__Rhizobacter					BIC						0	0	0	0.0210416	0.0140277	0	0.147291	0	0
8451	0	8	0	6	0	5	6	0	0	D_0__Bacteria; D_1__Proteobacteria; D_2__Gammaproteobacteria; D_3__Betaproteobacteriales; D_4__Rhodocyclaceae		NT				MIX					0	0.0280554	0	0.0210416	0	0.0175346	0.0210416	0	0
3099	0	0	1	6	0	10	1	0	0	D_0__Bacteria; D_1__Proteobacteria; D_2__Gammaproteobacteria; D_3__Betaproteobacteriales; D_4__Rhodocyclaceae			FE			MIX					0	0	0.00350693	0.0210416	0	0.0350693	0.00350693	0	0
8837	0	0	0	6	0	1	0	0	0	D_0__Bacteria; D_1__Deinococcus-Thermus; D_2__Deinococci; D_3__Deinococcales; D_4__Deinococcaceae; D_5__Deinococcus; D_6__Deinococcus enclensis						MIX					0	0	0	0.0210416	0	0.00350693	0	0	0
9635	0	0	76	6	0	0	0	0	0	D_0__Bacteria; D_1__Firmicutes; D_2__Clostridia; D_3__Clostridiales; D_4__Ruminococcaceae; D_5__Ruminiclostridium			FE								0	0	0.266526	0.0210416	0	0	0	0	0
443	0	0	41	6	0	0	0	0	0	D_0__Bacteria; D_1__Firmicutes; D_2__Clostridia; D_3__Clostridiales; D_4__Ruminococcaceae; D_5__Ruminiclostridium			FE								0	0	0.143784	0.0210416	0	0	0	0	0
1729	0	0	13	6	0	0	0	0	0	D_0__Bacteria; D_1__Firmicutes; D_2__Clostridia; D_3__Clostridiales; D_4__Ruminococcaceae; D_5__Ruminiclostridium; D_6__uncultured Firmicutes bacterium			FE								0	0	0.04559	0.0210416	0	0	0	0	0
846	0	0	0	6	0	0	0	0	0	D_0__Bacteria; D_1__Proteobacteria; D_2__Gammaproteobacteria; D_3__Betaproteobacteriales; D_4__Rhodocyclaceae; D_5__Azospira											0	0	0	0.0210416	0	0	0	0	0
1197	0	0	0	6	0	0	0	0	0	D_0__Bacteria											0	0	0	0.0210416	0	0	0	0	0
1259	0	0	0	6	0	0	0	0	0	D_0__Bacteria; D_1__Firmicutes; D_2__Bacilli; D_3__Bacillales; D_4__Paenibacillaceae; D_5__Cohnella											0	0	0	0.0210416	0	0	0	0	0
10601	0	0	0	6	0	0	0	0	0	D_0__Bacteria; D_1__Deinococcus-Thermus; D_2__Deinococci; D_3__Deinococcales; D_4__Deinococcaceae; D_5__Deinococcus; D_6__Deinococcus enclensis											0	0	0	0.0210416	0	0	0	0	0
4673	0	0	140	5	0	0	0	0	2	D_0__Bacteria; D_1__Acidobacteria; D_2__Acidobacteriia; D_3__Acidobacteriales; D_4__Acidobacteriaceae (Subgroup 1)			FE						AS3		0	0	0.49097	0.0175346	0	0	0	0	0.00701385
6544	0	0	0	5	0	100	1	6	0	D_0__Bacteria; D_1__Proteobacteria; D_2__Gammaproteobacteria; D_3__Betaproteobacteriales; D_4__Rhodocyclaceae; D_5__Dechloromonas; Ambiguous_taxa						MIX		MN			0	0	0	0.0175346	0	0.350693	0.00350693	0.0210416	0
6220	0	0	74	5	0	1	234	1	0	D_0__Bacteria; D_1__Proteobacteria; D_2__Alphaproteobacteria; D_3__Caulobacterales; D_4__Caulobacteraceae; D_5__Brevundimonas; Ambiguous_taxa			FE			MIX		MN			0	0	0.259513	0.0175346	0	0.00350693	0.820621	0.00350693	0
8923	0	0	0	5	0	14	1	1	0	D_0__Bacteria; D_1__Proteobacteria; D_2__Gammaproteobacteria; D_3__Betaproteobacteriales; D_4__Rhodocyclaceae; D_5__Dechloromonas; Ambiguous_taxa						MIX		MN			0	0	0	0.0175346	0	0.049097	0.00350693	0.00350693	0
2370	0	0	1	5	1	0	46	0	0	D_0__Bacteria; D_1__Proteobacteria; D_2__Gammaproteobacteria; D_3__Betaproteobacteriales; D_4__Burkholderiaceae			FE		BIC						0	0	0.00350693	0.0175346	0.00350693	0	0.161319	0	0
447	0	0	0	5	0	0	39	0	0	D_0__Bacteria; D_1__Actinobacteria											0	0	0	0.0175346	0	0	0.13677	0	0
167	0	0	99	5	0	0	0	0	0	D_0__Bacteria; D_1__Firmicutes; D_2__Clostridia; D_3__Clostridiales; D_4__Clostridiaceae 1			FE								0	0	0.347186	0.0175346	0	0	0	0	0
25	0	0	89	5	0	0	0	0	0	D_0__Bacteria; D_1__Acidobacteria; D_2__Acidobacteriia; D_3__Acidobacteriales; D_4__Acidobacteriaceae (Subgroup 1)			FE								0	0	0.312116	0.0175346	0	0	0	0	0
8301	0	0	68	5	0	0	0	0	0	D_0__Bacteria; D_1__Firmicutes; D_2__Clostridia; D_3__Clostridiales; D_4__Ruminococcaceae; D_5__Ruminiclostridium; D_6__uncultured Firmicutes bacterium			FE								0	0	0.238471	0.0175346	0	0	0	0	0
1535	0	0	0	5	0	0	0	0	0	D_0__Bacteria; D_1__Firmicutes; D_2__Bacilli; D_3__Bacillales											0	0	0	0.0175346	0	0	0	0	0
1731	0	0	0	5	0	0	0	0	0	D_0__Bacteria; D_1__Deinococcus-Thermus; D_2__Deinococci; D_3__Deinococcales; D_4__Deinococcaceae; D_5__Deinococcus; D_6__Deinococcus enclensis											0	0	0	0.0175346	0	0	0	0	0
1745	0	0	0	5	0	0	0	0	0	D_0__Bacteria; D_1__Firmicutes; D_2__Clostridia; D_3__Clostridiales; D_4__Ruminococcaceae; D_5__Ruminiclostridium											0	0	0	0.0175346	0	0	0	0	0
2976	0	0	0	5	0	0	0	0	0	D_0__Bacteria; D_1__Deinococcus-Thermus; D_2__Deinococci; D_3__Deinococcales; D_4__Deinococcaceae; D_5__Deinococcus; D_6__Deinococcus enclensis											0	0	0	0.0175346	0	0	0	0	0
5855	0	0	0	5	0	0	0	0	0	D_0__Bacteria; D_1__Deinococcus-Thermus; D_2__Deinococci; D_3__Deinococcales; D_4__Deinococcaceae; D_5__Deinococcus											0	0	0	0.0175346	0	0	0	0	0
6226	0	0	0	5	0	0	0	0	0	D_0__Bacteria; D_1__Deinococcus-Thermus; D_2__Deinococci; D_3__Deinococcales; D_4__Deinococcaceae; D_5__Deinococcus											0	0	0	0.0175346	0	0	0	0	0
7315	0	0	0	5	0	0	0	0	0	D_0__Bacteria; D_1__Proteobacteria; D_2__Gammaproteobacteria; D_3__Betaproteobacteriales; D_4__Rhodocyclaceae											0	0	0	0.0175346	0	0	0	0	0
128	0	0	0	4	0	0	6	12	0	D_0__Bacteria; D_1__Proteobacteria; D_2__Alphaproteobacteria; D_3__Rhizobiales; D_4__Pleomorphomonadaceae; D_5__uncultured; Ambiguous_taxa								MN			0	0	0	0.0140277	0	0	0.0210416	0.0420831	0
1919	0	9	0	4	0	23	4	3	0	D_0__Bacteria; D_1__Proteobacteria; D_2__Gammaproteobacteria; D_3__Betaproteobacteriales; D_4__Rhodocyclaceae		NT				MIX		MN			0	0.0315623	0	0.0140277	0	0.0806593	0.0140277	0.0105208	0
3627	0	0	0	4	0	3	0	2	0	D_0__Bacteria; D_1__Proteobacteria; D_2__Gammaproteobacteria; D_3__Betaproteobacteriales; D_4__Rhodocyclaceae						MIX		MN			0	0	0	0.0140277	0	0.0105208	0	0.00701385	0
9230	0	2	0	4	0	0	1	1	0	D_0__Bacteria; D_1__Proteobacteria; D_2__Gammaproteobacteria; D_3__Betaproteobacteriales; D_4__Rhodocyclaceae		NT						MN			0	0.00701385	0	0.0140277	0	0	0.00350693	0.00350693	0
4276	0	0	0	4	0	0	106	0	0	D_0__Bacteria; D_1__Proteobacteria; D_2__Gammaproteobacteria; D_3__Pseudomonadales; D_4__Moraxellaceae; D_5__Acinetobacter											0	0	0	0.0140277	0	0	0.371734	0	0
1249	0	0	0	4	4	0	41	0	0	D_0__Bacteria; D_1__Proteobacteria; D_2__Gammaproteobacteria; D_3__Betaproteobacteriales; D_4__Burkholderiaceae					BIC						0	0	0	0.0140277	0.0140277	0	0.143784	0	0
9120	0	0	0	4	5	0	19	0	0	D_0__Bacteria; D_1__Proteobacteria; D_2__Gammaproteobacteria; D_3__Betaproteobacteriales; D_4__Burkholderiaceae; D_5__Delftia; Ambiguous_taxa					BIC						0	0	0	0.0140277	0.0175346	0	0.0666316	0	0
8204	0	1	0	4	4	1	5	0	0	D_0__Bacteria; D_1__Proteobacteria; D_2__Gammaproteobacteria; D_3__Betaproteobacteriales; D_4__Burkholderiaceae; D_5__Delftia		NT			BIC	MIX					0	0.00350693	0	0.0140277	0.0140277	0.00350693	0.0175346	0	0
9906	0	0	0	4	0	0	2	0	0	D_0__Bacteria; D_1__Proteobacteria; D_2__Alphaproteobacteria; D_3__Rhodobacterales; D_4__Rhodobacteraceae; D_5__Cereibacter; Ambiguous_taxa											0	0	0	0.0140277	0	0	0.00701385	0	0
3084	0	0	0	4	0	6	0	0	0	D_0__Bacteria; D_1__Proteobacteria; D_2__Gammaproteobacteria; D_3__Betaproteobacteriales; D_4__Rhodocyclaceae						MIX					0	0	0	0.0140277	0	0.0210416	0	0	0
164	0	0	0	4	1	5	0	0	0	D_0__Bacteria; D_1__Proteobacteria; D_2__Gammaproteobacteria; D_3__Betaproteobacteriales; D_4__Rhodocyclaceae; D_5__Dechloromonas; Ambiguous_taxa					BIC	MIX					0	0	0	0.0140277	0.00350693	0.0175346	0	0	0
8434	0	0	0	4	0	5	0	0	0	D_0__Bacteria; D_1__Acidobacteria; D_2__Holophagae; D_3__Holophagales; D_4__Holophagaceae; Ambiguous_taxa; D_6__metagenome						MIX					0	0	0	0.0140277	0	0.0175346	0	0	0
405	0	0	47	4	0	0	0	0	0	D_0__Bacteria; D_1__Acidobacteria; D_2__Acidobacteriia; D_3__Solibacterales; D_4__Solibacteraceae (Subgroup 3); D_5__Candidatus Solibacter			FE								0	0	0.164826	0.0140277	0	0	0	0	0
1302	0	0	23	4	0	0	0	0	0	D_0__Bacteria; D_1__Firmicutes; D_2__Clostridia; D_3__Clostridiales; D_4__Ruminococcaceae; D_5__Ruminiclostridium			FE								0	0	0.0806593	0.0140277	0	0	0	0	0
3853	0	0	21	4	0	0	0	0	0	D_0__Bacteria; D_1__Firmicutes; D_2__Clostridia; D_3__Clostridiales; D_4__Ruminococcaceae; D_5__Ruminiclostridium; D_6__uncultured Firmicutes bacterium			FE								0	0	0.0736454	0.0140277	0	0	0	0	0
438	0	0	18	4	0	0	0	0	0	D_0__Bacteria; D_1__Firmicutes; D_2__Clostridia; D_3__Clostridiales; D_4__Peptococcaceae; D_5__Thermincola			FE								0	0	0.0631247	0.0140277	0	0	0	0	0
759	0	0	0	4	0	0	0	0	0	D_0__Bacteria; D_1__Deinococcus-Thermus; D_2__Deinococci; D_3__Deinococcales; D_4__Deinococcaceae; D_5__Deinococcus; D_6__Deinococcus enclensis											0	0	0	0.0140277	0	0	0	0	0
7554	0	0	0	4	0	0	0	0	0	D_0__Bacteria; D_1__Proteobacteria; D_2__Gammaproteobacteria; D_3__Betaproteobacteriales											0	0	0	0.0140277	0	0	0	0	0
9782	0	0	0	4	0	0	0	0	0	D_0__Bacteria; D_1__Firmicutes; D_2__Clostridia; D_3__Clostridiales; D_4__Clostridiaceae 1											0	0	0	0.0140277	0	0	0	0	0
8221	0	0	28	3	0	0	0	0	1	D_0__Bacteria; D_1__Acidobacteria; D_2__Acidobacteriia; D_3__Solibacterales; D_4__Solibacteraceae (Subgroup 3); D_5__Candidatus Solibacter			FE						AS3		0	0	0.0981939	0.0105208	0	0	0	0	0.00350693
8981	0	0	0	3	0	10	3	25	0	D_0__Bacteria; D_1__Proteobacteria; D_2__Gammaproteobacteria; D_3__Betaproteobacteriales; D_4__Rhodocyclaceae; D_5__Dechloromonas; Ambiguous_taxa						MIX		MN			0	0	0	0.0105208	0	0.0350693	0.0105208	0.0876732	0
3882	0	10	0	3	1	46	1	5	0	D_0__Bacteria; D_1__Proteobacteria; D_2__Gammaproteobacteria; D_3__Betaproteobacteriales; D_4__Rhodocyclaceae		NT			BIC	MIX		MN			0	0.0350693	0	0.0105208	0.00350693	0.161319	0.00350693	0.0175346	0
1382	0	2	0	3	1	1	4	3	0	D_0__Bacteria; D_1__Proteobacteria; D_2__Gammaproteobacteria; D_3__Betaproteobacteriales; D_4__Rhodocyclaceae		NT			BIC	MIX		MN			0	0.00701385	0	0.0105208	0.00350693	0.00350693	0.0140277	0.0105208	0
5524	0	2	0	3	0	6	1	1	0	D_0__Bacteria; D_1__Proteobacteria; D_2__Gammaproteobacteria; D_3__Betaproteobacteriales; D_4__Rhodocyclaceae		NT				MIX		MN			0	0.00701385	0	0.0105208	0	0.0210416	0.00350693	0.00350693	0
43	0	0	0	3	0	0	892	0	0	D_0__Bacteria; D_1__Actinobacteria; D_2__Actinobacteria; D_3__Propionibacteriales; D_4__Nocardioidaceae; D_5__Nocardioides; D_6__uncultured Nocardioides sp.											0	0	0	0.0105208	0	0	3.12818	0	0
946	0	0	1	3	0	0	165	0	0	D_0__Bacteria; D_1__Proteobacteria; D_2__Alphaproteobacteria; D_3__Sphingomonadales; D_4__Sphingomonadaceae			FE								0	0	0.00350693	0.0105208	0	0	0.578643	0	0
204	0	0	0	3	0	0	36	0	0	D_0__Bacteria; D_1__Bacteroidetes; D_2__Bacteroidia; D_3__Cytophagales; D_4__Hymenobacteraceae; D_5__Hymenobacter; Ambiguous_taxa											0	0	0	0.0105208	0	0	0.126249	0	0
481	0	0	0	3	7	0	26	0	0	D_0__Bacteria; D_1__Proteobacteria; D_2__Gammaproteobacteria; D_3__Betaproteobacteriales; D_4__Burkholderiaceae; D_5__Rhizobacter; Ambiguous_taxa					BIC						0	0	0	0.0105208	0.0245485	0	0.0911801	0	0
10018	0	0	0	3	0	0	18	0	0	D_0__Bacteria; D_1__Proteobacteria; D_2__Gammaproteobacteria; D_3__Pseudomonadales; D_4__Moraxellaceae; D_5__Acinetobacter											0	0	0	0.0105208	0	0	0.0631247	0	0
2242	0	0	0	3	1	7	1	0	0	D_0__Bacteria; D_1__Proteobacteria; D_2__Gammaproteobacteria; D_3__Betaproteobacteriales; D_4__Rhodocyclaceae					BIC	MIX					0	0	0	0.0105208	0.00350693	0.0245485	0.00350693	0	0
7010	0	0	0	3	0	3	1	0	0	D_0__Bacteria; D_1__Proteobacteria; D_2__Gammaproteobacteria; D_3__Betaproteobacteriales; D_4__Rhodocyclaceae						MIX					0	0	0	0.0105208	0	0.0105208	0.00350693	0	0
2234	0	0	0	3	1	0	1	0	0	D_0__Bacteria; D_1__Proteobacteria; D_2__Gammaproteobacteria; D_3__Betaproteobacteriales; D_4__Burkholderiaceae; D_5__Delftia					BIC						0	0	0	0.0105208	0.00350693	0	0.00350693	0	0
1782	0	0	0	3	0	0	1	0	0	D_0__Bacteria; D_1__Proteobacteria; D_2__Gammaproteobacteria; D_3__Betaproteobacteriales; D_4__Burkholderiaceae											0	0	0	0.0105208	0	0	0.00350693	0	0
4040	0	0	0	3	0	0	1	0	0	D_0__Bacteria; D_1__Deinococcus-Thermus; D_2__Deinococci; D_3__Deinococcales; D_4__Deinococcaceae; D_5__Deinococcus; D_6__Deinococcus enclensis											0	0	0	0.0105208	0	0	0.00350693	0	0
4791	0	0	0	3	0	0	1	0	0	D_0__Bacteria; D_1__Proteobacteria; D_2__Gammaproteobacteria; D_3__Betaproteobacteriales; D_4__Rhodocyclaceae; D_5__Dechloromonas											0	0	0	0.0105208	0	0	0.00350693	0	0
9054	0	0	0	3	0	0	1	0	0	D_0__Bacteria; D_1__Proteobacteria; D_2__Gammaproteobacteria; D_3__Betaproteobacteriales; D_4__Burkholderiaceae; D_5__Delftia											0	0	0	0.0105208	0	0	0.00350693	0	0
2697	0	0	0	3	0	7	0	0	0	D_0__Bacteria; D_1__Proteobacteria; D_2__Gammaproteobacteria; D_3__Betaproteobacteriales; D_4__Rhodocyclaceae						MIX					0	0	0	0.0105208	0	0.0245485	0	0	0
3361	0	0	0	3	0	5	0	0	0	D_0__Bacteria; D_1__Proteobacteria; D_2__Gammaproteobacteria; D_3__Betaproteobacteriales; D_4__Rhodocyclaceae						MIX					0	0	0	0.0105208	0	0.0175346	0	0	0
8904	0	0	0	3	0	3	0	0	0	D_0__Bacteria; D_1__Proteobacteria; D_2__Gammaproteobacteria; D_3__Betaproteobacteriales; D_4__Rhodocyclaceae						MIX					0	0	0	0.0105208	0	0.0105208	0	0	0
3534	0	0	52	3	0	0	0	0	0	D_0__Bacteria; D_1__Firmicutes; D_2__Clostridia; D_3__Clostridiales; D_4__Peptococcaceae; D_5__Thermincola			FE								0	0	0.18236	0.0105208	0	0	0	0	0
284	0	0	35	3	0	0	0	0	0	D_0__Bacteria; D_1__Actinobacteria; D_2__Coriobacteriia; D_3__OPB41			FE								0	0	0.122742	0.0105208	0	0	0	0	0
3320	0	0	30	3	0	0	0	0	0	D_0__Bacteria; D_1__Acidobacteria; D_2__Acidobacteriia; D_3__Solibacterales; D_4__Solibacteraceae (Subgroup 3); D_5__Candidatus Solibacter			FE								0	0	0.105208	0.0105208	0	0	0	0	0
1654	0	0	0	3	0	0	0	0	0	D_0__Bacteria; D_1__Firmicutes; D_2__Clostridia; D_3__Clostridiales; D_4__Lachnospiraceae											0	0	0	0.0105208	0	0	0	0	0
2178	0	0	0	3	0	0	0	0	0	D_0__Bacteria; D_1__Firmicutes; D_2__Clostridia; D_3__Clostridiales; D_4__Peptococcaceae; D_5__Desulfosporosinus											0	0	0	0.0105208	0	0	0	0	0
2740	0	0	0	3	0	0	0	0	0	D_0__Bacteria; D_1__Deinococcus-Thermus; D_2__Deinococci; D_3__Deinococcales; D_4__Deinococcaceae; D_5__Deinococcus; D_6__Deinococcus enclensis											0	0	0	0.0105208	0	0	0	0	0
3150	0	0	0	3	0	0	0	0	0	D_0__Bacteria; D_1__Deinococcus-Thermus; D_2__Deinococci; D_3__Deinococcales; D_4__Deinococcaceae; D_5__Deinococcus; D_6__Deinococcus enclensis											0	0	0	0.0105208	0	0	0	0	0
3641	0	0	0	3	0	0	0	0	0	D_0__Bacteria; D_1__Proteobacteria; D_2__Alphaproteobacteria; D_3__Sphingomonadales; D_4__Sphingomonadaceae											0	0	0	0.0105208	0	0	0	0	0
7456	0	0	0	3	0	0	0	0	0	D_0__Bacteria; D_1__Proteobacteria; D_2__Gammaproteobacteria; D_3__Betaproteobacteriales; D_4__Rhodocyclaceae											0	0	0	0.0105208	0	0	0	0	0
7843	0	0	0	3	0	0	0	0	0	D_0__Bacteria; D_1__Proteobacteria; D_2__Gammaproteobacteria; D_3__Betaproteobacteriales; D_4__Rhodocyclaceae											0	0	0	0.0105208	0	0	0	0	0
6494	0	1	0	2	0	4	0	18	0	D_0__Bacteria; D_1__Proteobacteria; D_2__Gammaproteobacteria; D_3__Betaproteobacteriales; D_4__Rhodocyclaceae		NT				MIX		MN			0	0.00350693	0	0.00701385	0	0.0140277	0	0.0631247	0
5445	0	0	10	2	0	4	258	5	0	D_0__Bacteria; D_1__Proteobacteria; D_2__Alphaproteobacteria; D_3__Caulobacterales; D_4__Caulobacteraceae; D_5__Brevundimonas			FE			MIX		MN			0	0	0.0350693	0.00701385	0	0.0140277	0.904787	0.0175346	0
7842	0	0	0	2	0	16	0	4	0	D_0__Bacteria; D_1__Proteobacteria; D_2__Gammaproteobacteria; D_3__Betaproteobacteriales; D_4__Rhodocyclaceae						MIX		MN			0	0	0	0.00701385	0	0.0561108	0	0.0140277	0
10520	0	1	0	2	0	3	0	2	0	D_0__Bacteria; D_1__Proteobacteria; D_2__Gammaproteobacteria; D_3__Betaproteobacteriales; D_4__Rhodocyclaceae		NT				MIX		MN			0	0.00350693	0	0.00701385	0	0.0105208	0	0.00701385	0
538	0	0	0	2	0	24	0	1	0	D_0__Bacteria; D_1__Acidobacteria; D_2__Holophagae; D_3__Holophagales; D_4__Holophagaceae						MIX		MN			0	0	0	0.00701385	0	0.0841662	0	0.00350693	0
9061	0	0	0	2	0	13	0	1	0	D_0__Bacteria; D_1__Proteobacteria; D_2__Gammaproteobacteria; D_3__Betaproteobacteriales; D_4__Rhodocyclaceae; D_5__Dechloromonas; Ambiguous_taxa						MIX		MN			0	0	0	0.00701385	0	0.04559	0	0.00350693	0
3838	0	0	0	2	0	0	0	1	0	D_0__Bacteria; D_1__Proteobacteria; D_2__Gammaproteobacteria; D_3__Betaproteobacteriales; D_4__Rhodocyclaceae								MN			0	0	0	0.00701385	0	0	0	0.00350693	0
105	0	0	0	2	0	0	174	0	0	D_0__Bacteria; D_1__Actinobacteria; D_2__Actinobacteria; D_3__Propionibacteriales; D_4__Nocardioidaceae; D_5__Nocardioides; D_6__uncultured Nocardioides sp.											0	0	0	0.00701385	0	0	0.610205	0	0
9123	0	0	0	2	1	0	71	0	0	D_0__Bacteria; D_1__Proteobacteria; D_2__Gammaproteobacteria; D_3__Betaproteobacteriales; D_4__Burkholderiaceae; D_5__Rhizobacter; Ambiguous_taxa					BIC						0	0	0	0.00701385	0.00350693	0	0.248992	0	0
6626	0	0	0	2	0	0	55	0	0	D_0__Bacteria; D_1__Proteobacteria; D_2__Gammaproteobacteria; D_3__Pseudomonadales; D_4__Moraxellaceae; D_5__Acinetobacter											0	0	0	0.00701385	0	0	0.192881	0	0
501	0	0	0	2	0	0	37	0	0	D_0__Archaea; D_1__Crenarchaeota; D_2__Bathyarchaeia; D_3__uncultured crenarchaeote; D_4__uncultured crenarchaeote; D_5__uncultured crenarchaeote; D_6__uncultured crenarchaeote											0	0	0	0.00701385	0	0	0.129756	0	0
9910	0	0	0	2	0	0	29	0	0	D_0__Bacteria; D_1__Proteobacteria; D_2__Gammaproteobacteria; D_3__Pseudomonadales; D_4__Moraxellaceae; D_5__Acinetobacter											0	0	0	0.00701385	0	0	0.101701	0	0
9628	0	0	0	2	0	0	14	0	0	D_0__Bacteria; D_1__Proteobacteria; D_2__Gammaproteobacteria; D_3__Pseudomonadales; D_4__Moraxellaceae; D_5__Acinetobacter; D_6__Acinetobacter lwoffii											0	0	0	0.00701385	0	0	0.049097	0	0
10618	0	0	0	2	0	0	11	0	0	D_0__Bacteria; D_1__Proteobacteria; D_2__Alphaproteobacteria; D_3__Rhizobiales; D_4__Pleomorphomonadaceae; D_5__uncultured; Ambiguous_taxa											0	0	0	0.00701385	0	0	0.0385762	0	0
452	0	0	0	2	0	0	10	0	0	D_0__Bacteria; D_1__Actinobacteria											0	0	0	0.00701385	0	0	0.0350693	0	0
10009	0	0	0	2	1	0	7	0	0	D_0__Bacteria; D_1__Proteobacteria; D_2__Gammaproteobacteria; D_3__Betaproteobacteriales; D_4__Burkholderiaceae					BIC						0	0	0	0.00701385	0.00350693	0	0.0245485	0	0
10103	0	0	0	2	0	0	6	0	0	D_0__Bacteria; D_1__Proteobacteria; D_2__Gammaproteobacteria; D_3__Pseudomonadales; D_4__Moraxellaceae; D_5__Acinetobacter; D_6__Acinetobacter lwoffii											0	0	0	0.00701385	0	0	0.0210416	0	0
2674	0	0	0	2	0	0	5	0	0	D_0__Bacteria											0	0	0	0.00701385	0	0	0.0175346	0	0
2426	0	0	0	2	0	0	2	0	0	D_0__Bacteria; D_1__Proteobacteria; D_2__Gammaproteobacteria; D_3__Betaproteobacteriales; D_4__Burkholderiaceae; D_5__Delftia											0	0	0	0.00701385	0	0	0.00701385	0	0
6225	0	0	0	2	0	10	1	0	0	D_0__Bacteria; D_1__Proteobacteria; D_2__Gammaproteobacteria; D_3__Betaproteobacteriales; D_4__Rhodocyclaceae; D_5__Dechloromonas						MIX					0	0	0	0.00701385	0	0.0350693	0.00350693	0	0
7834	0	1	0	2	0	1	1	0	0	D_0__Bacteria; D_1__Proteobacteria; D_2__Gammaproteobacteria; D_3__Betaproteobacteriales; D_4__Burkholderiaceae; D_5__Delftia		NT				MIX					0	0.00350693	0	0.00701385	0	0.00350693	0.00350693	0	0
7247	0	0	0	2	0	0	1	0	0	D_0__Bacteria; D_1__Proteobacteria; D_2__Gammaproteobacteria; D_3__Betaproteobacteriales; D_4__Rhodocyclaceae											0	0	0	0.00701385	0	0	0.00350693	0	0
6171	0	1	0	2	0	19	0	0	0	D_0__Bacteria; D_1__Proteobacteria; D_2__Gammaproteobacteria; D_3__Betaproteobacteriales; D_4__Rhodocyclaceae; D_5__Dechloromonas; Ambiguous_taxa		NT				MIX					0	0.00350693	0	0.00701385	0	0.0666316	0	0	0
6642	0	0	0	2	0	9	0	0	0	D_0__Bacteria; D_1__Acidobacteria; D_2__Holophagae; D_3__Holophagales; D_4__Holophagaceae						MIX					0	0	0	0.00701385	0	0.0315623	0	0	0
2083	0	1	0	2	0	7	0	0	0	D_0__Bacteria; D_1__Proteobacteria; D_2__Gammaproteobacteria; D_3__Betaproteobacteriales; D_4__Rhodocyclaceae; D_5__Dechloromonas; Ambiguous_taxa		NT				MIX					0	0.00350693	0	0.00701385	0	0.0245485	0	0	0
2323	0	0	0	2	0	3	0	0	0	D_0__Bacteria; D_1__Proteobacteria; D_2__Gammaproteobacteria; D_3__Betaproteobacteriales; D_4__Rhodocyclaceae						MIX					0	0	0	0.00701385	0	0.0105208	0	0	0
3905	0	0	0	2	0	3	0	0	0	D_0__Bacteria; D_1__Proteobacteria; D_2__Gammaproteobacteria; D_3__Betaproteobacteriales; D_4__Rhodocyclaceae						MIX					0	0	0	0.00701385	0	0.0105208	0	0	0
214	0	0	61	2	0	0	0	0	0	D_0__Bacteria; D_1__Actinobacteria; D_2__Acidimicrobiia; D_3__Microtrichales; D_4__uncultured			FE								0	0	0.213922	0.00701385	0	0	0	0	0
2097	0	0	51	2	0	0	0	0	0	D_0__Bacteria; D_1__Acidobacteria; D_2__Acidobacteriia; D_3__Acidobacteriales; D_4__Acidobacteriaceae (Subgroup 1); Ambiguous_taxa; Ambiguous_taxa			FE								0	0	0.178853	0.00701385	0	0	0	0	0
4279	0	0	40	2	0	0	0	0	0	D_0__Bacteria; D_1__Firmicutes; D_2__Clostridia; D_3__Clostridiales; D_4__Peptococcaceae; D_5__Thermincola			FE								0	0	0.140277	0.00701385	0	0	0	0	0
6045	0	0	28	2	0	0	0	0	0	D_0__Bacteria; D_1__Firmicutes; D_2__Clostridia; D_3__Clostridiales; D_4__Ruminococcaceae			FE								0	0	0.0981939	0.00701385	0	0	0	0	0
5619	0	0	23	2	0	0	0	0	0	D_0__Bacteria; D_1__Firmicutes; D_2__Clostridia; D_3__Clostridiales; D_4__Peptococcaceae; D_5__Thermincola			FE								0	0	0.0806593	0.00701385	0	0	0	0	0
1698	0	0	1	2	0	0	0	0	0	D_0__Bacteria; D_1__Proteobacteria; D_2__Alphaproteobacteria; D_3__Rhizobiales; D_4__Beijerinckiaceae; D_5__uncultured; D_6__uncultured bacterium			FE								0	0	0.00350693	0.00701385	0	0	0	0	0
4786	0	0	1	2	0	0	0	0	0	D_0__Bacteria; D_1__Actinobacteria; D_2__Coriobacteriia; D_3__OPB41			FE								0	0	0.00350693	0.00701385	0	0	0	0	0
1468	0	0	0	2	0	0	0	0	0	D_0__Bacteria; D_1__Acidobacteria; D_2__Holophagae; D_3__Holophagales; D_4__Holophagaceae											0	0	0	0.00701385	0	0	0	0	0
1692	0	0	0	2	0	0	0	0	0	D_0__Bacteria; D_1__Firmicutes; D_2__Clostridia; D_3__Clostridiales											0	0	0	0.00701385	0	0	0	0	0
1940	0	0	0	2	0	0	0	0	0	D_0__Bacteria											0	0	0	0.00701385	0	0	0	0	0
2012	0	0	0	2	0	0	0	0	0	D_0__Bacteria											0	0	0	0.00701385	0	0	0	0	0
2070	0	0	0	2	0	0	0	0	0	D_0__Bacteria; D_1__Proteobacteria; D_2__Alphaproteobacteria; D_3__Rickettsiales; D_4__Mitochondria											0	0	0	0.00701385	0	0	0	0	0
2359	0	0	0	2	0	0	0	0	0	D_0__Bacteria; D_1__Deinococcus-Thermus; D_2__Deinococci; D_3__Deinococcales; D_4__Deinococcaceae; D_5__Deinococcus											0	0	0	0.00701385	0	0	0	0	0
2469	0	0	0	2	0	0	0	0	0	D_0__Bacteria; D_1__Firmicutes; D_2__Clostridia; D_3__Clostridiales; D_4__Gracilibacteraceae											0	0	0	0.00701385	0	0	0	0	0
2875	0	0	0	2	0	0	0	0	0	D_0__Bacteria; D_1__Acidobacteria; D_2__Acidobacteriia; D_3__Acidobacteriales; D_4__Acidobacteriaceae (Subgroup 1)											0	0	0	0.00701385	0	0	0	0	0
2943	0	0	0	2	0	0	0	0	0	D_0__Bacteria; D_1__Deinococcus-Thermus; D_2__Deinococci; D_3__Deinococcales; D_4__Deinococcaceae; D_5__Deinococcus; D_6__Deinococcus enclensis											0	0	0	0.00701385	0	0	0	0	0
3159	0	0	0	2	0	0	0	0	0	D_0__Bacteria; D_1__Deinococcus-Thermus; D_2__Deinococci; D_3__Deinococcales; D_4__Deinococcaceae; D_5__Deinococcus; D_6__Deinococcus enclensis											0	0	0	0.00701385	0	0	0	0	0
3628	0	0	0	2	0	0	0	0	0	D_0__Bacteria; D_1__Deinococcus-Thermus; D_2__Deinococci; D_3__Deinococcales; D_4__Deinococcaceae; D_5__Deinococcus; D_6__Deinococcus enclensis											0	0	0	0.00701385	0	0	0	0	0
3751	0	0	0	2	0	0	0	0	0	D_0__Bacteria; D_1__Proteobacteria; D_2__Gammaproteobacteria; D_3__Betaproteobacteriales; D_4__Burkholderiaceae											0	0	0	0.00701385	0	0	0	0	0
4001	0	0	0	2	0	0	0	0	0	D_0__Bacteria; D_1__Deinococcus-Thermus; D_2__Deinococci; D_3__Deinococcales; D_4__Deinococcaceae; D_5__Deinococcus; D_6__Deinococcus enclensis											0	0	0	0.00701385	0	0	0	0	0
4305	0	0	0	2	0	0	0	0	0	D_0__Bacteria; D_1__Deinococcus-Thermus; D_2__Deinococci; D_3__Deinococcales; D_4__Deinococcaceae; D_5__Deinococcus; D_6__Deinococcus enclensis											0	0	0	0.00701385	0	0	0	0	0
4744	0	0	0	2	0	0	0	0	0	D_0__Bacteria; D_1__Proteobacteria; D_2__Alphaproteobacteria; D_3__Rickettsiales; D_4__Mitochondria											0	0	0	0.00701385	0	0	0	0	0
5517	0	0	0	2	0	0	0	0	0	D_0__Bacteria; D_1__Deinococcus-Thermus; D_2__Deinococci; D_3__Deinococcales; D_4__Deinococcaceae; D_5__Deinococcus; D_6__Deinococcus enclensis											0	0	0	0.00701385	0	0	0	0	0
6251	0	0	0	2	0	0	0	0	0	D_0__Bacteria; D_1__Proteobacteria; D_2__Gammaproteobacteria; D_3__Betaproteobacteriales; D_4__Rhodocyclaceae											0	0	0	0.00701385	0	0	0	0	0
6541	0	0	0	2	0	0	0	0	0	D_0__Bacteria; D_1__Proteobacteria; D_2__Gammaproteobacteria; D_3__Betaproteobacteriales; D_4__Rhodocyclaceae											0	0	0	0.00701385	0	0	0	0	0
7499	0	0	0	2	0	0	0	0	0	D_0__Bacteria; D_1__Deinococcus-Thermus; D_2__Deinococci; D_3__Deinococcales; D_4__Deinococcaceae; D_5__Deinococcus; D_6__Deinococcus enclensis											0	0	0	0.00701385	0	0	0	0	0
127	0	0	179	1	0	0	0	0	1	D_0__Bacteria; D_1__Bacteroidetes; D_2__Bacteroidia; D_3__Flavobacteriales; D_4__Weeksellaceae; D_5__Empedobacter			FE						AS3		0	0	0.62774	0.00350693	0	0	0	0	0.00350693
4032	0	0	0	1	0	7	0	194	0	D_0__Bacteria; D_1__Proteobacteria; D_2__Gammaproteobacteria; D_3__Betaproteobacteriales; D_4__Rhodocyclaceae						MIX		MN			0	0	0	0.00350693	0	0.0245485	0	0.680344	0
5813	0	0	0	1	0	4	0	96	0	D_0__Bacteria; D_1__Proteobacteria; D_2__Gammaproteobacteria; D_3__Betaproteobacteriales; D_4__Rhodocyclaceae						MIX		MN			0	0	0	0.00350693	0	0.0140277	0	0.336665	0
5446	0	0	0	1	0	0	0	70	0	D_0__Bacteria; D_1__Proteobacteria; D_2__Gammaproteobacteria; D_3__Betaproteobacteriales; D_4__Rhodocyclaceae								MN			0	0	0	0.00350693	0	0	0	0.245485	0
170	0	0	0	1	0	0	38	3	0	D_0__Bacteria; D_1__Bacteroidetes; D_2__Ignavibacteria; D_3__Ignavibacteriales; D_4__BSV40; D_5__uncultured bacterium; D_6__uncultured bacterium								MN			0	0	0	0.00350693	0	0	0.133263	0.0105208	0
7048	0	0	0	1	0	0	0	3	0	D_0__Bacteria; D_1__Proteobacteria; D_2__Gammaproteobacteria; D_3__Betaproteobacteriales; D_4__Rhodocyclaceae								MN			0	0	0	0.00350693	0	0	0	0.0105208	0
7078	0	4	0	1	0	1	0	2	0	D_0__Bacteria; D_1__Proteobacteria; D_2__Gammaproteobacteria		NT				MIX		MN			0	0.0140277	0	0.00350693	0	0.00350693	0	0.00701385	0
9759	0	1	0	1	0	1	0	2	0	D_0__Bacteria; D_1__Proteobacteria; D_2__Gammaproteobacteria; D_3__Betaproteobacteriales; D_4__Rhodocyclaceae		NT				MIX		MN			0	0.00350693	0	0.00350693	0	0.00350693	0	0.00701385	0
3957	0	0	0	1	0	5	1	1	0	D_0__Bacteria; D_1__Proteobacteria; D_2__Gammaproteobacteria; D_3__Betaproteobacteriales; D_4__Rhodocyclaceae						MIX		MN			0	0	0	0.00350693	0	0.0175346	0.00350693	0.00350693	0
6043	0	0	0	1	0	7	0	1	0	D_0__Bacteria; D_1__Acidobacteria; D_2__Holophagae; D_3__Holophagales; D_4__Holophagaceae						MIX		MN			0	0	0	0.00350693	0	0.0245485	0	0.00350693	0
2945	0	0	0	1	0	1	0	1	0	D_0__Bacteria; D_1__Proteobacteria; D_2__Gammaproteobacteria; D_3__Betaproteobacteriales; D_4__Rhodocyclaceae						MIX		MN			0	0	0	0.00350693	0	0.00350693	0	0.00350693	0
10020	0	0	0	1	0	0	194	0	0	D_0__Bacteria; D_1__Proteobacteria; D_2__Gammaproteobacteria; D_3__Pseudomonadales; D_4__Moraxellaceae; D_5__Acinetobacter											0	0	0	0.00350693	0	0	0.680344	0	0
664	0	0	0	1	0	0	110	0	0	D_0__Bacteria; D_1__Proteobacteria; D_2__Gammaproteobacteria; D_3__Pseudomonadales; D_4__Moraxellaceae; D_5__Acinetobacter											0	0	0	0.00350693	0	0	0.385762	0	0
8332	0	0	0	1	0	0	62	0	0	D_0__Bacteria; D_1__Proteobacteria; D_2__Alphaproteobacteria; D_3__Caulobacterales; D_4__Caulobacteraceae; D_5__Brevundimonas											0	0	0	0.00350693	0	0	0.217429	0	0
818	0	0	0	1	0	121	46	0	0	D_0__Bacteria; D_1__Proteobacteria; D_2__Alphaproteobacteria; D_3__Caulobacterales; D_4__Caulobacteraceae; D_5__Brevundimonas						MIX					0	0	0	0.00350693	0	0.424338	0.161319	0	0
441	0	0	0	1	0	0	23	0	0	D_0__Bacteria; D_1__Proteobacteria											0	0	0	0.00350693	0	0	0.0806593	0	0
1215	0	0	0	1	0	0	23	0	0	D_0__Bacteria; D_1__Proteobacteria; D_2__Gammaproteobacteria; D_3__Betaproteobacteriales; D_4__Burkholderiaceae; D_5__Delftia											0	0	0	0.00350693	0	0	0.0806593	0	0
1705	0	0	0	1	0	0	23	0	0	D_0__Bacteria; D_1__Actinobacteria; D_2__Actinobacteria; D_3__Propionibacteriales; D_4__Nocardioidaceae; D_5__Nocardioides; D_6__uncultured Nocardioides sp.											0	0	0	0.00350693	0	0	0.0806593	0	0
7891	0	0	0	1	0	0	23	0	0	D_0__Bacteria; D_1__Proteobacteria; D_2__Gammaproteobacteria; D_3__Pseudomonadales; D_4__Moraxellaceae; D_5__Acinetobacter											0	0	0	0.00350693	0	0	0.0806593	0	0
10330	0	0	0	1	0	0	19	0	0	D_0__Bacteria; D_1__Proteobacteria; D_2__Gammaproteobacteria; D_3__Pseudomonadales; D_4__Moraxellaceae; D_5__Acinetobacter											0	0	0	0.00350693	0	0	0.0666316	0	0
5873	0	0	0	1	0	0	17	0	0	D_0__Bacteria; D_1__Proteobacteria; D_2__Gammaproteobacteria; D_3__Pseudomonadales; D_4__Moraxellaceae; D_5__Acinetobacter; D_6__Acinetobacter lwoffii											0	0	0	0.00350693	0	0	0.0596177	0	0
11	0	0	0	1	0	0	14	0	0	D_0__Bacteria; D_1__Proteobacteria; D_2__Gammaproteobacteria; D_3__Pseudomonadales; D_4__Moraxellaceae; D_5__Acinetobacter											0	0	0	0.00350693	0	0	0.049097	0	0
458	0	0	0	1	0	0	14	0	0	D_0__Bacteria; D_1__Bacteroidetes; D_2__Bacteroidia; D_3__Cytophagales; D_4__Hymenobacteraceae; D_5__Hymenobacter											0	0	0	0.00350693	0	0	0.049097	0	0
2121	0	0	0	1	0	0	13	0	0	D_0__Bacteria; D_1__Proteobacteria; D_2__Gammaproteobacteria; D_3__Betaproteobacteriales; D_4__Burkholderiaceae; D_5__Delftia											0	0	0	0.00350693	0	0	0.04559	0	0
4948	0	0	0	1	0	0	13	0	0	D_0__Bacteria; D_1__Proteobacteria; D_2__Gammaproteobacteria; D_3__Betaproteobacteriales; D_4__Burkholderiaceae											0	0	0	0.00350693	0	0	0.04559	0	0
7040	0	0	0	1	1	0	7	0	0	D_0__Bacteria; D_1__Proteobacteria; D_2__Gammaproteobacteria; D_3__Betaproteobacteriales; D_4__Burkholderiaceae					BIC						0	0	0	0.00350693	0.00350693	0	0.0245485	0	0
715	0	0	0	1	0	0	7	0	0	D_0__Bacteria; D_1__Omnitrophicaeota; D_2__Omnitrophica WOR_2 bacterium GWF2_63_9; D_3__Omnitrophica WOR_2 bacterium GWF2_63_9; D_4__Omnitrophica WOR_2 bacterium GWF2_63_9; D_5__Omnitrophica WOR_2 bacterium GWF2_63_9; D_6__Omnitrophica WOR_2 bacterium GWF2_63_9											0	0	0	0.00350693	0	0	0.0245485	0	0
3875	0	0	0	1	0	0	7	0	0	D_0__Bacteria; D_1__Proteobacteria; D_2__Gammaproteobacteria; D_3__Betaproteobacteriales; D_4__Burkholderiaceae											0	0	0	0.00350693	0	0	0.0245485	0	0
4370	0	0	0	1	0	0	7	0	0	D_0__Bacteria; D_1__Proteobacteria; D_2__Gammaproteobacteria; D_3__Betaproteobacteriales; D_4__Burkholderiaceae; D_5__Delftia; Ambiguous_taxa											0	0	0	0.00350693	0	0	0.0245485	0	0
9718	0	0	0	1	1	0	6	0	0	D_0__Bacteria; D_1__Proteobacteria; D_2__Gammaproteobacteria; D_3__Betaproteobacteriales; D_4__Burkholderiaceae					BIC						0	0	0	0.00350693	0.00350693	0	0.0210416	0	0
1612	0	0	0	1	0	0	6	0	0	D_0__Bacteria; D_1__Planctomycetes											0	0	0	0.00350693	0	0	0.0210416	0	0
6822	0	0	0	1	0	0	6	0	0	D_0__Bacteria; D_1__Proteobacteria; D_2__Deltaproteobacteria; D_3__Sva0485; Ambiguous_taxa; Ambiguous_taxa; Ambiguous_taxa											0	0	0	0.00350693	0	0	0.0210416	0	0
3105	0	0	0	1	0	1	5	0	0	D_0__Bacteria; D_1__Proteobacteria; D_2__Gammaproteobacteria; D_3__Betaproteobacteriales; D_4__Rhodocyclaceae						MIX					0	0	0	0.00350693	0	0.00350693	0.0175346	0	0
779	0	0	0	1	0	0	5	0	0	D_0__Bacteria											0	0	0	0.00350693	0	0	0.0175346	0	0
1221	0	0	0	1	0	0	5	0	0	D_0__Bacteria; D_1__Omnitrophicaeota											0	0	0	0.00350693	0	0	0.0175346	0	0
5774	0	0	0	1	0	0	5	0	0	D_0__Bacteria; D_1__Proteobacteria; D_2__Gammaproteobacteria; D_3__Pseudomonadales; D_4__Moraxellaceae; D_5__Acinetobacter											0	0	0	0.00350693	0	0	0.0175346	0	0
7268	0	0	0	1	0	0	5	0	0	D_0__Bacteria; D_1__Proteobacteria; D_2__Alphaproteobacteria; D_3__Caulobacterales; D_4__Caulobacteraceae; D_5__Brevundimonas											0	0	0	0.00350693	0	0	0.0175346	0	0
8364	0	0	0	1	0	0	5	0	0	D_0__Bacteria; D_1__Proteobacteria; D_2__Gammaproteobacteria; D_3__Pseudomonadales; D_4__Moraxellaceae; D_5__Acinetobacter											0	0	0	0.00350693	0	0	0.0175346	0	0
1470	0	1	0	1	0	0	4	0	0	D_0__Bacteria; D_1__Proteobacteria; D_2__Gammaproteobacteria; D_3__Betaproteobacteriales; D_4__Rhodocyclaceae; D_5__Azospira		NT									0	0.00350693	0	0.00350693	0	0	0.0140277	0	0
8632	0	0	0	1	0	0	4	0	0	D_0__Bacteria; D_1__Proteobacteria; D_2__Gammaproteobacteria; D_3__Pseudomonadales; D_4__Moraxellaceae; D_5__Acinetobacter											0	0	0	0.00350693	0	0	0.0140277	0	0
9378	0	0	0	1	0	0	4	0	0	D_0__Bacteria; D_1__Proteobacteria; D_2__Gammaproteobacteria; D_3__Pseudomonadales; D_4__Moraxellaceae; D_5__Acinetobacter; D_6__Acinetobacter lwoffii											0	0	0	0.00350693	0	0	0.0140277	0	0
1343	0	0	0	1	0	0	3	0	0	D_0__Bacteria											0	0	0	0.00350693	0	0	0.0105208	0	0
10147	0	0	0	1	0	0	3	0	0	D_0__Bacteria; D_1__Proteobacteria; D_2__Gammaproteobacteria; D_3__Betaproteobacteriales; D_4__Burkholderiaceae											0	0	0	0.00350693	0	0	0.0105208	0	0
157	0	42	8	1	2	0	2	0	0	D_0__Bacteria; D_1__Verrucomicrobia; D_2__Verrucomicrobiae; D_3__Opitutales; D_4__Opitutaceae; D_5__Lacunisphaera		NT	FE		BIC						0	0.147291	0.0280554	0.00350693	0.00701385	0	0.00701385	0	0
434	0	0	10	1	0	0	2	0	0	D_0__Bacteria; D_1__Proteobacteria; D_2__Alphaproteobacteria; D_3__Rhodobacterales; D_4__Rhodobacteraceae			FE								0	0	0.0350693	0.00350693	0	0	0.00701385	0	0
2817	0	0	0	1	0	0	2	0	0	D_0__Bacteria; D_1__Proteobacteria; D_2__Deltaproteobacteria; D_3__NKB15											0	0	0	0.00350693	0	0	0.00701385	0	0
3148	0	0	0	1	0	0	2	0	0	D_0__Bacteria; D_1__Proteobacteria; D_2__Gammaproteobacteria; D_3__Betaproteobacteriales; D_4__Rhodocyclaceae											0	0	0	0.00350693	0	0	0.00701385	0	0
7910	0	0	0	1	0	0	2	0	0	D_0__Bacteria; D_1__Proteobacteria; D_2__Gammaproteobacteria; D_3__Betaproteobacteriales; D_4__Burkholderiaceae											0	0	0	0.00350693	0	0	0.00701385	0	0
8271	0	0	0	1	0	0	2	0	0	D_0__Bacteria; D_1__Proteobacteria; D_2__Gammaproteobacteria; D_3__Pseudomonadales; D_4__Moraxellaceae; D_5__Acinetobacter											0	0	0	0.00350693	0	0	0.00701385	0	0
45	0	485	55	1	0	102	1	0	0	D_0__Bacteria; D_1__Bacteroidetes; D_2__Ignavibacteria; D_3__Ignavibacteriales; D_4__SR-FBR-L83		NT	FE			MIX					0	1.70086	0.192881	0.00350693	0	0.357706	0.00350693	0	0
5899	0	0	0	1	0	18	1	0	0	D_0__Bacteria; D_1__Proteobacteria; D_2__Gammaproteobacteria; D_3__Betaproteobacteriales; D_4__Rhodocyclaceae; D_5__Dechloromonas; Ambiguous_taxa						MIX					0	0	0	0.00350693	0	0.0631247	0.00350693	0	0
8875	0	0	0	1	0	2	1	0	0	D_0__Bacteria; D_1__Proteobacteria; D_2__Gammaproteobacteria; D_3__Betaproteobacteriales; D_4__Burkholderiaceae						MIX					0	0	0	0.00350693	0	0.00701385	0.00350693	0	0
1317	0	0	0	1	0	0	1	0	0	D_0__Bacteria; D_1__Proteobacteria; D_2__Gammaproteobacteria; D_3__Betaproteobacteriales											0	0	0	0.00350693	0	0	0.00350693	0	0
1589	0	0	0	1	0	0	1	0	0	D_0__Bacteria; D_1__Actinobacteria; D_2__RBG-16-55-12											0	0	0	0.00350693	0	0	0.00350693	0	0
1881	0	0	0	1	0	0	1	0	0	D_0__Bacteria; D_1__Patescibacteria; D_2__ABY1; D_3__Candidatus Magasanikbacteria											0	0	0	0.00350693	0	0	0.00350693	0	0
2118	0	0	0	1	0	0	1	0	0	D_0__Bacteria; D_1__Proteobacteria; D_2__Deltaproteobacteria; D_3__Myxococcales											0	0	0	0.00350693	0	0	0.00350693	0	0
5088	0	0	0	1	0	0	1	0	0	D_0__Bacteria; D_1__Proteobacteria; D_2__Gammaproteobacteria; D_3__Betaproteobacteriales; D_4__Rhodocyclaceae											0	0	0	0.00350693	0	0	0.00350693	0	0
5996	0	0	0	1	0	0	1	0	0	D_0__Bacteria; D_1__Proteobacteria; D_2__Gammaproteobacteria; D_3__Pseudomonadales; D_4__Moraxellaceae; D_5__Acinetobacter											0	0	0	0.00350693	0	0	0.00350693	0	0
6534	0	0	0	1	0	0	1	0	0	D_0__Bacteria; D_1__Proteobacteria; D_2__Gammaproteobacteria; D_3__Betaproteobacteriales; D_4__Rhodocyclaceae											0	0	0	0.00350693	0	0	0.00350693	0	0
3894	0	6	1	1	0	185	0	0	0	D_0__Bacteria; D_1__Proteobacteria; D_2__Alphaproteobacteria; D_3__Rhizobiales; D_4__Rhizobiaceae; D_5__Allorhizobium-Neorhizobium-Pararhizobium-Rhizobium		NT	FE			MIX					0	0.0210416	0.00350693	0.00350693	0	0.648781	0	0	0
3938	0	0	0	1	0	16	0	0	0	D_0__Bacteria; D_1__Acidobacteria; D_2__Holophagae; D_3__Holophagales; D_4__Holophagaceae						MIX					0	0	0	0.00350693	0	0.0561108	0	0	0
6613	0	0	0	1	0	11	0	0	0	D_0__Bacteria; D_1__Proteobacteria; D_2__Gammaproteobacteria; D_3__Betaproteobacteriales						MIX					0	0	0	0.00350693	0	0.0385762	0	0	0
5752	0	0	0	1	0	6	0	0	0	D_0__Bacteria; D_1__Proteobacteria; D_2__Gammaproteobacteria; D_3__Betaproteobacteriales; D_4__Rhodocyclaceae						MIX					0	0	0	0.00350693	0	0.0210416	0	0	0
2348	0	0	0	1	0	2	0	0	0	D_0__Bacteria; D_1__Proteobacteria; D_2__Gammaproteobacteria; D_3__Betaproteobacteriales; D_4__Rhodocyclaceae						MIX					0	0	0	0.00350693	0	0.00701385	0	0	0
3856	0	0	0	1	0	2	0	0	0	D_0__Bacteria; D_1__Proteobacteria; D_2__Gammaproteobacteria; D_3__Betaproteobacteriales; D_4__Rhodocyclaceae						MIX					0	0	0	0.00350693	0	0.00701385	0	0	0
4123	0	0	0	1	0	2	0	0	0	D_0__Bacteria; D_1__Proteobacteria; D_2__Gammaproteobacteria; D_3__Betaproteobacteriales; D_4__Rhodocyclaceae						MIX					0	0	0	0.00350693	0	0.00701385	0	0	0
9988	0	1	0	1	2	1	0	0	0	D_0__Bacteria; D_1__Proteobacteria; D_2__Gammaproteobacteria; D_3__Betaproteobacteriales		NT			BIC	MIX					0	0.00350693	0	0.00350693	0.00701385	0.00350693	0	0	0
5291	0	0	0	1	0	1	0	0	0	D_0__Bacteria; D_1__Acidobacteria; D_2__Holophagae; D_3__Holophagales; D_4__Holophagaceae; Ambiguous_taxa; D_6__metagenome						MIX					0	0	0	0.00350693	0	0.00350693	0	0	0
6996	0	0	0	1	0	1	0	0	0	D_0__Bacteria; D_1__Proteobacteria; D_2__Gammaproteobacteria; D_3__Betaproteobacteriales; D_4__Burkholderiaceae; D_5__Delftia						MIX					0	0	0	0.00350693	0	0.00350693	0	0	0
7457	0	0	0	1	0	1	0	0	0	D_0__Bacteria; D_1__Proteobacteria; D_2__Gammaproteobacteria; D_3__Betaproteobacteriales; D_4__Rhodocyclaceae						MIX					0	0	0	0.00350693	0	0.00350693	0	0	0
8272	0	0	0	1	0	1	0	0	0	D_0__Bacteria; D_1__Proteobacteria; D_2__Gammaproteobacteria; D_3__Betaproteobacteriales; D_4__Rhodocyclaceae						MIX					0	0	0	0.00350693	0	0.00350693	0	0	0
10115	0	0	0	1	10453	0	0	0	0	D_0__Bacteria; D_1__Acidobacteria; D_2__Holophagae; D_3__Subgroup 7					BIC						0	0	0	0.00350693	36.6579	0	0	0	0
2440	0	0	0	1	4263	0	0	0	0	D_0__Bacteria; D_1__Proteobacteria; D_2__Alphaproteobacteria; D_3__Sphingomonadales; D_4__Sphingomonadaceae; D_5__Sphingosinicella					BIC						0	0	0	0.00350693	14.95	0	0	0	0
2371	0	0	0	1	142	0	0	0	0	D_0__Bacteria; D_1__Proteobacteria; D_2__Alphaproteobacteria; D_3__Sphingomonadales; D_4__Sphingomonadaceae; D_5__Sphingosinicella					BIC						0	0	0	0.00350693	0.497984	0	0	0	0
207	0	0	83	1	0	0	0	0	0	D_0__Bacteria; D_1__Proteobacteria; D_2__Gammaproteobacteria; D_3__WD260; D_4__uncultured bacterium; D_5__uncultured bacterium; D_6__uncultured bacterium			FE								0	0	0.291075	0.00350693	0	0	0	0	0
245	0	0	45	1	0	0	0	0	0	D_0__Bacteria; D_1__Firmicutes; D_2__Clostridia; D_3__Clostridiales; D_4__Family XI; D_5__Peptoniphilus; D_6__uncultured bacterium			FE								0	0	0.157812	0.00350693	0	0	0	0	0
3541	0	0	43	1	0	0	0	0	0	D_0__Bacteria; D_1__Acidobacteria; D_2__Acidobacteriia; D_3__Acidobacteriales; D_4__Acidobacteriaceae (Subgroup 1)			FE								0	0	0.150798	0.00350693	0	0	0	0	0
357	0	0	26	1	0	0	0	0	0	D_0__Bacteria; D_1__Actinobacteria; D_2__Acidimicrobiia; D_3__uncultured			FE								0	0	0.0911801	0.00350693	0	0	0	0	0
5673	0	0	26	1	0	0	0	0	0	D_0__Bacteria; D_1__Firmicutes; D_2__Clostridia; D_3__Clostridiales; D_4__Peptococcaceae; D_5__Thermincola			FE								0	0	0.0911801	0.00350693	0	0	0	0	0
6720	0	0	22	1	0	0	0	0	0	D_0__Bacteria; D_1__Firmicutes; D_2__Clostridia; D_3__Clostridiales; D_4__Peptococcaceae; D_5__Thermincola			FE								0	0	0.0771524	0.00350693	0	0	0	0	0
462	0	0	21	1	0	0	0	0	0	D_0__Bacteria; D_1__Acidobacteria; D_2__Acidobacteriia; D_3__Acidobacteriales; D_4__Acidobacteriaceae (Subgroup 1); D_5__uncultured; Ambiguous_taxa			FE								0	0	0.0736454	0.00350693	0	0	0	0	0
618	0	0	13	1	0	0	0	0	0	D_0__Bacteria; D_1__Firmicutes; D_2__Clostridia; D_3__Clostridiales; D_4__Ruminococcaceae			FE								0	0	0.04559	0.00350693	0	0	0	0	0
416	0	0	8	1	0	0	0	0	0	D_0__Bacteria; D_1__Acidobacteria; D_2__Acidobacteriia; D_3__Solibacterales; D_4__Solibacteraceae (Subgroup 3)			FE								0	0	0.0280554	0.00350693	0	0	0	0	0
7021	0	0	7	1	0	0	0	0	0	D_0__Bacteria; D_1__Firmicutes; D_2__Clostridia; D_3__Clostridiales; D_4__Ruminococcaceae			FE								0	0	0.0245485	0.00350693	0	0	0	0	0
9791	0	0	7	1	0	0	0	0	0	D_0__Bacteria; D_1__Firmicutes; D_2__Clostridia; D_3__Clostridiales; D_4__Ruminococcaceae; D_5__Ruminiclostridium; D_6__uncultured Firmicutes bacterium			FE								0	0	0.0245485	0.00350693	0	0	0	0	0
4874	0	0	6	1	0	0	0	0	0	D_0__Bacteria; D_1__Acidobacteria; D_2__Acidobacteriia; D_3__Solibacterales; D_4__Solibacteraceae (Subgroup 3); D_5__Candidatus Solibacter			FE								0	0	0.0210416	0.00350693	0	0	0	0	0
3852	0	0	5	1	0	0	0	0	0	D_0__Bacteria; D_1__Firmicutes; D_2__Clostridia; D_3__Clostridiales; D_4__Ruminococcaceae; D_5__Ruminiclostridium; D_6__uncultured Firmicutes bacterium			FE								0	0	0.0175346	0.00350693	0	0	0	0	0
10683	0	0	5	1	0	0	0	0	0	D_0__Bacteria; D_1__Acidobacteria; D_2__Acidobacteriia; D_3__Solibacterales; D_4__Solibacteraceae (Subgroup 3)			FE								0	0	0.0175346	0.00350693	0	0	0	0	0
5889	0	0	4	1	0	0	0	0	0	D_0__Bacteria; D_1__Acidobacteria; D_2__Acidobacteriia; D_3__Solibacterales; D_4__Solibacteraceae (Subgroup 3)			FE								0	0	0.0140277	0.00350693	0	0	0	0	0
8695	0	0	3	1	0	0	0	0	0	D_0__Bacteria; D_1__Acidobacteria; D_2__Acidobacteriia; D_3__Acidobacteriales; D_4__Acidobacteriaceae (Subgroup 1)			FE								0	0	0.0105208	0.00350693	0	0	0	0	0
63	0	0	2	1	0	0	0	0	0	D_0__Bacteria; D_1__Acidobacteria; D_2__Acidobacteriia; D_3__Acidobacteriales; D_4__Acidobacteriaceae (Subgroup 1)			FE								0	0	0.00701385	0.00350693	0	0	0	0	0
6779	0	4	0	1	0	0	0	0	0	D_0__Bacteria; D_1__Proteobacteria; D_2__Gammaproteobacteria; D_3__Betaproteobacteriales; D_4__Rhodocyclaceae		NT									0	0.0140277	0	0.00350693	0	0	0	0	0
5937	0	3	0	1	0	0	0	0	0	D_0__Bacteria; D_1__Proteobacteria; D_2__Gammaproteobacteria; D_3__Enterobacteriales; D_4__Enterobacteriaceae; D_5__Escherichia-Shigella		NT									0	0.0105208	0	0.00350693	0	0	0	0	0
3208	0	2	0	1	0	0	0	0	0	D_0__Bacteria; D_1__Proteobacteria; D_2__Gammaproteobacteria; D_3__Betaproteobacteriales; D_4__Rhodocyclaceae		NT									0	0.00701385	0	0.00350693	0	0	0	0	0
993	0	1	0	1	0	0	0	0	0	D_0__Bacteria; D_1__Proteobacteria; D_2__Gammaproteobacteria; D_3__Betaproteobacteriales; D_4__Rhodocyclaceae		NT									0	0.00350693	0	0.00350693	0	0	0	0	0
8436	0	1	0	1	0	0	0	0	0	D_0__Bacteria; D_1__Proteobacteria; D_2__Gammaproteobacteria; D_3__Betaproteobacteriales; D_4__Burkholderiaceae		NT									0	0.00350693	0	0.00350693	0	0	0	0	0
1056	0	0	0	1	0	0	0	0	0	D_0__Bacteria; D_1__Patescibacteria; D_2__ABY1; D_3__Candidatus Magasanikbacteria											0	0	0	0.00350693	0	0	0	0	0
2062	0	0	0	1	0	0	0	0	0	D_0__Bacteria; D_1__Deinococcus-Thermus; D_2__Deinococci; D_3__Deinococcales; D_4__Deinococcaceae; D_5__Deinococcus											0	0	0	0.00350693	0	0	0	0	0
2205	0	0	0	1	0	0	0	0	0	D_0__Bacteria; D_1__Proteobacteria; D_2__Gammaproteobacteria; D_3__Enterobacteriales; D_4__Enterobacteriaceae; D_5__Escherichia-Shigella											0	0	0	0.00350693	0	0	0	0	0
2211	0	0	0	1	0	0	0	0	0	D_0__Bacteria; D_1__Actinobacteria; D_2__Actinobacteria; D_3__Micrococcales; D_4__Micrococcaceae; D_5__Micrococcus											0	0	0	0.00350693	0	0	0	0	0
2603	0	0	0	1	0	0	0	0	0	D_0__Bacteria; D_1__Proteobacteria; D_2__Alphaproteobacteria; D_3__Sphingomonadales; D_4__Sphingomonadaceae; D_5__Sphingomonas											0	0	0	0.00350693	0	0	0	0	0
2696	0	0	0	1	0	0	0	0	0	D_0__Bacteria; D_1__Proteobacteria; D_2__Gammaproteobacteria; D_3__Betaproteobacteriales; D_4__Methylophilaceae; D_5__Methylobacillus											0	0	0	0.00350693	0	0	0	0	0
2701	0	0	0	1	0	0	0	0	0	D_0__Bacteria; D_1__Firmicutes; D_2__Clostridia; D_3__Clostridiales; D_4__Clostridiaceae 1; D_5__Oxobacter											0	0	0	0.00350693	0	0	0	0	0
2937	0	0	0	1	0	0	0	0	0	D_0__Bacteria; D_1__Actinobacteria; D_2__Thermoleophilia; D_3__Gaiellales; D_4__uncultured											0	0	0	0.00350693	0	0	0	0	0
3174	0	0	0	1	0	0	0	0	0	D_0__Bacteria; D_1__Proteobacteria; D_2__Gammaproteobacteria; D_3__Betaproteobacteriales; D_4__Rhodocyclaceae											0	0	0	0.00350693	0	0	0	0	0
3202	0	0	0	1	0	0	0	0	0	D_0__Bacteria; D_1__Deinococcus-Thermus; D_2__Deinococci; D_3__Deinococcales; D_4__Deinococcaceae; D_5__Deinococcus											0	0	0	0.00350693	0	0	0	0	0
3482	0	0	0	1	0	0	0	0	0	D_0__Bacteria; D_1__Proteobacteria; D_2__Gammaproteobacteria; D_3__Betaproteobacteriales; D_4__Burkholderiaceae											0	0	0	0.00350693	0	0	0	0	0
3762	0	0	0	1	0	0	0	0	0	D_0__Bacteria; D_1__Bacteroidetes; D_2__Ignavibacteria; D_3__Ignavibacteriales; D_4__SR-FBR-L83											0	0	0	0.00350693	0	0	0	0	0
4424	0	0	0	1	0	0	0	0	0	D_0__Bacteria; D_1__Acidobacteria; D_2__Acidobacteriia; D_3__Acidobacteriales; D_4__Acidobacteriaceae (Subgroup 1)											0	0	0	0.00350693	0	0	0	0	0
5354	0	0	0	1	0	0	0	0	0	D_0__Bacteria											0	0	0	0.00350693	0	0	0	0	0
5617	0	0	0	1	0	0	0	0	0	D_0__Bacteria; D_1__Proteobacteria; D_2__Alphaproteobacteria; D_3__Acetobacterales; D_4__Acetobacteraceae; D_5__Acidisoma; Ambiguous_taxa											0	0	0	0.00350693	0	0	0	0	0
5885	0	0	0	1	0	0	0	0	0	D_0__Bacteria; D_1__Proteobacteria; D_2__Gammaproteobacteria; D_3__Vibrionales; D_4__Vibrionaceae; D_5__Vibrio											0	0	0	0.00350693	0	0	0	0	0
5999	0	0	0	1	0	0	0	0	0	D_0__Bacteria; D_1__Proteobacteria; D_2__Gammaproteobacteria; D_3__Betaproteobacteriales; D_4__Rhodocyclaceae											0	0	0	0.00350693	0	0	0	0	0
6093	0	0	0	1	0	0	0	0	0	D_0__Bacteria; D_1__Rokubacteria; D_2__NC10; D_3__Rokubacteriales											0	0	0	0.00350693	0	0	0	0	0
6954	0	0	0	1	0	0	0	0	0	D_0__Bacteria; D_1__Deinococcus-Thermus; D_2__Deinococci; D_3__Deinococcales; D_4__Deinococcaceae; D_5__Deinococcus; D_6__Deinococcus enclensis											0	0	0	0.00350693	0	0	0	0	0
7128	0	0	0	1	0	0	0	0	0	D_0__Bacteria; D_1__Firmicutes; D_2__Clostridia; D_3__Clostridiales; D_4__Peptococcaceae; D_5__Desulfosporosinus											0	0	0	0.00350693	0	0	0	0	0
7736	0	0	0	1	0	0	0	0	0	D_0__Bacteria; D_1__Armatimonadetes; D_2__uncultured											0	0	0	0.00350693	0	0	0	0	0
8333	0	0	0	1	0	0	0	0	0	D_0__Bacteria; D_1__Proteobacteria; D_2__Gammaproteobacteria; D_3__Betaproteobacteriales											0	0	0	0.00350693	0	0	0	0	0
8682	0	0	0	1	0	0	0	0	0	D_0__Bacteria; D_1__Proteobacteria; D_2__Gammaproteobacteria; D_3__Betaproteobacteriales; D_4__Rhodocyclaceae											0	0	0	0.00350693	0	0	0	0	0
8969	0	0	0	1	0	0	0	0	0	D_0__Bacteria; D_1__Proteobacteria; D_2__Gammaproteobacteria; D_3__Betaproteobacteriales											0	0	0	0.00350693	0	0	0	0	0
9021	0	0	0	1	0	0	0	0	0	D_0__Bacteria; D_1__Proteobacteria; D_2__Gammaproteobacteria; D_3__Betaproteobacteriales; D_4__Rhodocyclaceae											0	0	0	0.00350693	0	0	0	0	0
9256	0	0	0	1	0	0	0	0	0	D_0__Bacteria; D_1__Deinococcus-Thermus; D_2__Deinococci; D_3__Deinococcales; D_4__Deinococcaceae; D_5__Deinococcus; D_6__Deinococcus enclensis											0	0	0	0.00350693	0	0	0	0	0
9506	0	0	0	1	0	0	0	0	0	D_0__Bacteria; D_1__Deinococcus-Thermus; D_2__Deinococci; D_3__Deinococcales; D_4__Deinococcaceae; D_5__Deinococcus; D_6__Deinococcus enclensis											0	0	0	0.00350693	0	0	0	0	0
10289	0	0	0	1	0	0	0	0	0	D_0__Bacteria; D_1__Deinococcus-Thermus; D_2__Deinococci; D_3__Deinococcales; D_4__Deinococcaceae; D_5__Deinococcus; D_6__Deinococcus enclensis											0	0	0	0.00350693	0	0	0	0	0
8929	0	0	0	0	0	0	0	0	11529	D_0__Bacteria; D_1__Proteobacteria; D_2__Gammaproteobacteria; D_3__Betaproteobacteriales; D_4__Burkholderiaceae; D_5__Cupriavidus; Ambiguous_taxa									AS3		0	0	0	0	0	0	0	0	40.4314
3925	0	2	2	0	1	8	0	0	6519	D_0__Bacteria; D_1__Proteobacteria; D_2__Alphaproteobacteria; D_3__Rhizobiales; D_4__Rhizobiaceae; D_5__Allorhizobium-Neorhizobium-Pararhizobium-Rhizobium; D_6__uncultured bacterium		NT	FE		BIC	MIX			AS3		0	0.00701385	0.00701385	0	0.00350693	0.0280554	0	0	22.8617
10271	0	0	0	0	0	6	0	0	2181	D_0__Bacteria; D_1__Proteobacteria; D_2__Alphaproteobacteria; D_3__Rhizobiales; D_4__Rhizobiaceae; D_5__Allorhizobium-Neorhizobium-Pararhizobium-Rhizobium						MIX			AS3		0	0	0	0	0	0.0210416	0	0	7.64861
10022	0	0	2	0	0	2	0	0	981	D_0__Bacteria; D_1__Proteobacteria; D_2__Alphaproteobacteria; D_3__Rhizobiales; D_4__Rhizobiaceae; D_5__Allorhizobium-Neorhizobium-Pararhizobium-Rhizobium; D_6__uncultured bacterium			FE			MIX			AS3		0	0	0.00701385	0	0	0.00701385	0	0	3.44029
7650	0	0	0	0	0	1	0	0	972	D_0__Bacteria; D_1__Proteobacteria; D_2__Alphaproteobacteria; D_3__Rhizobiales; D_4__Rhizobiaceae; D_5__Allorhizobium-Neorhizobium-Pararhizobium-Rhizobium						MIX			AS3		0	0	0	0	0	0.00350693	0	0	3.40873
7851	0	1	1	0	0	0	0	0	768	D_0__Bacteria; D_1__Proteobacteria; D_2__Alphaproteobacteria; D_3__Rhizobiales; D_4__Rhizobiaceae; D_5__Allorhizobium-Neorhizobium-Pararhizobium-Rhizobium		NT	FE						AS3		0	0.00350693	0.00350693	0	0	0	0	0	2.69332
8131	0	0	0	0	0	0	0	0	703	D_0__Bacteria; D_1__Proteobacteria; D_2__Gammaproteobacteria; D_3__Betaproteobacteriales; D_4__Burkholderiaceae; D_5__Cupriavidus									AS3		0	0	0	0	0	0	0	0	2.46537
9185	0	0	0	0	0	0	0	0	539	D_0__Bacteria; D_1__Proteobacteria; D_2__Alphaproteobacteria; D_3__Rhizobiales; D_4__Rhizobiaceae; D_5__Allorhizobium-Neorhizobium-Pararhizobium-Rhizobium									AS3		0	0	0	0	0	0	0	0	1.89023
20	0	0	0	0	0	0	0	0	446	D_0__Bacteria; D_1__Proteobacteria; D_2__Gammaproteobacteria; D_3__Betaproteobacteriales; D_4__Burkholderiaceae; D_5__Cupriavidus									AS3		0	0	0	0	0	0	0	0	1.56409
141	0	0	0	0	0	0	1	0	373	D_0__Bacteria; D_1__Proteobacteria; D_2__Alphaproteobacteria; D_3__Rhizobiales; D_4__Rhizobiaceae									AS3		0	0	0	0	0	0	0.00350693	0	1.30808
3146	0	0	0	0	0	2	0	0	341	D_0__Bacteria; D_1__Proteobacteria; D_2__Alphaproteobacteria; D_3__Rhizobiales; D_4__Rhizobiaceae; D_5__Allorhizobium-Neorhizobium-Pararhizobium-Rhizobium; D_6__uncultured bacterium						MIX			AS3		0	0	0	0	0	0.00701385	0	0	1.19586
6125	0	0	0	0	0	8	1	0	322	D_0__Bacteria; D_1__Proteobacteria; D_2__Alphaproteobacteria; D_3__Rhizobiales; D_4__Rhizobiaceae; D_5__Allorhizobium-Neorhizobium-Pararhizobium-Rhizobium						MIX			AS3		0	0	0	0	0	0.0280554	0.00350693	0	1.12923
3649	0	0	0	0	0	0	0	0	217	D_0__Bacteria; D_1__Proteobacteria; D_2__Gammaproteobacteria; D_3__Betaproteobacteriales; D_4__Burkholderiaceae; D_5__Cupriavidus; Ambiguous_taxa									AS3		0	0	0	0	0	0	0	0	0.761003
1858	0	0	0	0	0	0	0	0	191	D_0__Bacteria; D_1__Proteobacteria; D_2__Gammaproteobacteria; D_3__Betaproteobacteriales; D_4__Burkholderiaceae; D_5__Cupriavidus									AS3		0	0	0	0	0	0	0	0	0.669823
1323	0	0	0	0	0	1	0	0	164	D_0__Bacteria; D_1__Proteobacteria; D_2__Alphaproteobacteria; D_3__Rhizobiales; D_4__Rhizobiaceae; D_5__Allorhizobium-Neorhizobium-Pararhizobium-Rhizobium; D_6__uncultured bacterium						MIX			AS3		0	0	0	0	0	0.00350693	0	0	0.575136
1727	0	0	0	0	0	1	0	0	150	D_0__Bacteria; D_1__Proteobacteria; D_2__Alphaproteobacteria; D_3__Rhizobiales; D_4__Rhizobiaceae; D_5__Allorhizobium-Neorhizobium-Pararhizobium-Rhizobium						MIX			AS3		0	0	0	0	0	0.00350693	0	0	0.526039
7854	0	0	0	0	0	0	0	0	150	D_0__Bacteria; D_1__Proteobacteria; D_2__Alphaproteobacteria; D_3__Rhizobiales; D_4__Rhizobiaceae									AS3		0	0	0	0	0	0	0	0	0.526039
3357	0	0	0	0	0	0	0	0	148	D_0__Bacteria; D_1__Proteobacteria; D_2__Alphaproteobacteria; D_3__Rhizobiales; D_4__Rhizobiaceae; D_5__Allorhizobium-Neorhizobium-Pararhizobium-Rhizobium; D_6__uncultured bacterium									AS3		0	0	0	0	0	0	0	0	0.519025
3381	0	2	0	0	4	0	0	0	142	D_0__Bacteria; D_1__Proteobacteria; D_2__Alphaproteobacteria; D_3__Rhizobiales; D_4__Rhizobiaceae		NT			BIC				AS3		0	0.00701385	0	0	0.0140277	0	0	0	0.497984
8597	0	0	0	0	0	2	0	0	140	D_0__Bacteria; D_1__Proteobacteria; D_2__Alphaproteobacteria; D_3__Rhizobiales; D_4__Rhizobiaceae; D_5__Allorhizobium-Neorhizobium-Pararhizobium-Rhizobium; D_6__uncultured bacterium						MIX			AS3		0	0	0	0	0	0.00701385	0	0	0.49097
980	0	0	0	0	0	0	0	0	134	D_0__Bacteria; D_1__Proteobacteria; D_2__Alphaproteobacteria; D_3__Rhizobiales; D_4__Rhizobiaceae; D_5__Allorhizobium-Neorhizobium-Pararhizobium-Rhizobium									AS3		0	0	0	0	0	0	0	0	0.469928
6851	0	0	0	0	0	0	0	0	128	D_0__Bacteria; D_1__Proteobacteria; D_2__Gammaproteobacteria; D_3__Betaproteobacteriales; D_4__Burkholderiaceae; D_5__Cupriavidus									AS3		0	0	0	0	0	0	0	0	0.448887
4733	0	0	0	0	0	0	0	0	100	D_0__Bacteria; D_1__Proteobacteria; D_2__Alphaproteobacteria; D_3__Rhizobiales; D_4__Rhizobiaceae; D_5__Allorhizobium-Neorhizobium-Pararhizobium-Rhizobium									AS3		0	0	0	0	0	0	0	0	0.350693
490	0	0	0	0	0	0	0	0	75	D_0__Bacteria; D_1__Proteobacteria; D_2__Alphaproteobacteria; D_3__Rhizobiales; D_4__Rhizobiaceae; D_5__Allorhizobium-Neorhizobium-Pararhizobium-Rhizobium; D_6__uncultured bacterium									AS3		0	0	0	0	0	0	0	0	0.263019
3254	0	0	0	0	0	0	0	0	75	D_0__Bacteria; D_1__Proteobacteria; D_2__Alphaproteobacteria; D_3__Rhizobiales; D_4__Rhizobiaceae; D_5__Allorhizobium-Neorhizobium-Pararhizobium-Rhizobium									AS3		0	0	0	0	0	0	0	0	0.263019
567	0	0	0	0	0	0	0	0	70	D_0__Bacteria; D_1__Proteobacteria; D_2__Alphaproteobacteria; D_3__Rhizobiales; D_4__Rhizobiaceae; D_5__Allorhizobium-Neorhizobium-Pararhizobium-Rhizobium									AS3		0	0	0	0	0	0	0	0	0.245485
276	0	0	0	0	0	0	0	0	60	D_0__Bacteria; D_1__Proteobacteria; D_2__Alphaproteobacteria; D_3__Rhizobiales; D_4__Rhizobiaceae; D_5__Allorhizobium-Neorhizobium-Pararhizobium-Rhizobium									AS3		0	0	0	0	0	0	0	0	0.210416
2158	0	0	0	0	0	0	0	0	55	D_0__Bacteria; D_1__Proteobacteria; D_2__Alphaproteobacteria; D_3__Rhizobiales; D_4__Rhizobiaceae; D_5__Allorhizobium-Neorhizobium-Pararhizobium-Rhizobium									AS3		0	0	0	0	0	0	0	0	0.192881
7904	0	0	0	0	0	0	0	0	51	D_0__Bacteria; D_1__Proteobacteria; D_2__Alphaproteobacteria; D_3__Rhizobiales; D_4__Rhizobiaceae; D_5__Allorhizobium-Neorhizobium-Pararhizobium-Rhizobium									AS3		0	0	0	0	0	0	0	0	0.178853
10438	0	0	0	0	2	0	13	0	46	D_0__Bacteria; D_1__Proteobacteria; D_2__Alphaproteobacteria; D_3__Sphingomonadales; D_4__Sphingomonadaceae; D_5__Sphingobium; Ambiguous_taxa					BIC				AS3		0	0	0	0	0.00701385	0	0.04559	0	0.161319
7875	0	0	0	0	0	0	0	0	43	D_0__Bacteria; D_1__Proteobacteria; D_2__Alphaproteobacteria; D_3__Rhizobiales; D_4__Rhizobiaceae; D_5__Allorhizobium-Neorhizobium-Pararhizobium-Rhizobium									AS3		0	0	0	0	0	0	0	0	0.150798
4159	0	0	0	0	0	0	0	0	36	D_0__Bacteria; D_1__Proteobacteria; D_2__Gammaproteobacteria; D_3__Betaproteobacteriales; D_4__Burkholderiaceae; D_5__Cupriavidus									AS3		0	0	0	0	0	0	0	0	0.126249
9146	0	0	0	0	0	0	0	0	35	D_0__Bacteria; D_1__Proteobacteria; D_2__Gammaproteobacteria; D_3__Betaproteobacteriales; D_4__Burkholderiaceae; D_5__Cupriavidus; Ambiguous_taxa									AS3		0	0	0	0	0	0	0	0	0.122742
6319	0	0	0	0	0	0	0	0	32	D_0__Bacteria; D_1__Proteobacteria; D_2__Gammaproteobacteria; D_3__Betaproteobacteriales; D_4__Burkholderiaceae; D_5__Cupriavidus; Ambiguous_taxa									AS3		0	0	0	0	0	0	0	0	0.112222
3136	0	0	0	0	0	0	0	0	30	D_0__Bacteria; D_1__Proteobacteria; D_2__Alphaproteobacteria; D_3__Rhizobiales; D_4__Rhizobiaceae; D_5__Allorhizobium-Neorhizobium-Pararhizobium-Rhizobium									AS3		0	0	0	0	0	0	0	0	0.105208
533	0	0	0	0	0	0	0	0	27	D_0__Bacteria; D_1__Proteobacteria; D_2__Gammaproteobacteria; D_3__Betaproteobacteriales; D_4__Burkholderiaceae; D_5__Cupriavidus									AS3		0	0	0	0	0	0	0	0	0.094687
5074	0	0	0	0	0	0	0	0	27	D_0__Bacteria; D_1__Proteobacteria; D_2__Gammaproteobacteria; D_3__Betaproteobacteriales; D_4__Burkholderiaceae; D_5__Cupriavidus									AS3		0	0	0	0	0	0	0	0	0.094687
3907	0	0	0	0	0	0	0	0	26	D_0__Bacteria; D_1__Proteobacteria; D_2__Gammaproteobacteria; D_3__Betaproteobacteriales; D_4__Burkholderiaceae; D_5__Cupriavidus									AS3		0	0	0	0	0	0	0	0	0.0911801
6227	0	0	0	0	0	0	0	0	26	D_0__Bacteria; D_1__Proteobacteria; D_2__Gammaproteobacteria; D_3__Betaproteobacteriales; D_4__Burkholderiaceae; D_5__Cupriavidus									AS3		0	0	0	0	0	0	0	0	0.0911801
1241	0	0	0	0	0	0	0	0	25	D_0__Bacteria; D_1__Proteobacteria; D_2__Alphaproteobacteria; D_3__Rhizobiales; D_4__Rhizobiaceae; D_5__Allorhizobium-Neorhizobium-Pararhizobium-Rhizobium									AS3		0	0	0	0	0	0	0	0	0.0876732
1271	0	0	0	0	0	0	0	0	25	D_0__Bacteria; D_1__Proteobacteria; D_2__Gammaproteobacteria; D_3__Betaproteobacteriales; D_4__Burkholderiaceae; D_5__Cupriavidus									AS3		0	0	0	0	0	0	0	0	0.0876732
2248	0	0	0	0	0	0	0	0	25	D_0__Bacteria; D_1__Proteobacteria; D_2__Alphaproteobacteria; D_3__Rhizobiales; D_4__Rhizobiaceae									AS3		0	0	0	0	0	0	0	0	0.0876732
3114	0	0	0	0	0	0	0	0	22	D_0__Bacteria; D_1__Proteobacteria; D_2__Alphaproteobacteria; D_3__Rhizobiales; D_4__Rhizobiaceae; D_5__Allorhizobium-Neorhizobium-Pararhizobium-Rhizobium									AS3		0	0	0	0	0	0	0	0	0.0771524
826	0	0	0	0	0	0	0	0	21	D_0__Bacteria; D_1__Proteobacteria									AS3		0	0	0	0	0	0	0	0	0.0736454
8892	0	0	0	0	0	0	0	0	18	D_0__Bacteria; D_1__Proteobacteria; D_2__Alphaproteobacteria; D_3__Rhizobiales; D_4__Rhizobiaceae; D_5__Allorhizobium-Neorhizobium-Pararhizobium-Rhizobium									AS3		0	0	0	0	0	0	0	0	0.0631247
9037	0	0	0	0	0	0	0	0	17	D_0__Bacteria; D_1__Proteobacteria; D_2__Gammaproteobacteria; D_3__Betaproteobacteriales; D_4__Burkholderiaceae; D_5__Cupriavidus									AS3		0	0	0	0	0	0	0	0	0.0596177
4375	0	0	0	0	0	1	0	0	16	D_0__Bacteria; D_1__Proteobacteria; D_2__Alphaproteobacteria; D_3__Rhizobiales; D_4__Rhizobiaceae; D_5__Allorhizobium-Neorhizobium-Pararhizobium-Rhizobium						MIX			AS3		0	0	0	0	0	0.00350693	0	0	0.0561108
6176	0	0	0	0	0	0	0	0	16	D_0__Bacteria; D_1__Proteobacteria; D_2__Gammaproteobacteria; D_3__Betaproteobacteriales; D_4__Burkholderiaceae; D_5__Cupriavidus									AS3		0	0	0	0	0	0	0	0	0.0561108
4284	0	0	0	0	0	0	0	0	15	D_0__Bacteria; D_1__Proteobacteria; D_2__Gammaproteobacteria; D_3__Betaproteobacteriales; D_4__Burkholderiaceae; D_5__Cupriavidus									AS3		0	0	0	0	0	0	0	0	0.0526039
1970	0	0	0	0	0	0	1	0	13	D_0__Bacteria; D_1__Proteobacteria; D_2__Alphaproteobacteria									AS3		0	0	0	0	0	0	0.00350693	0	0.04559
10576	0	0	0	0	0	1	0	0	13	D_0__Bacteria; D_1__Proteobacteria; D_2__Alphaproteobacteria; D_3__Rhizobiales; D_4__Rhizobiaceae; D_5__Allorhizobium-Neorhizobium-Pararhizobium-Rhizobium						MIX			AS3		0	0	0	0	0	0.00350693	0	0	0.04559
8507	0	0	0	0	0	0	0	0	13	D_0__Bacteria; D_1__Proteobacteria; D_2__Gammaproteobacteria; D_3__Betaproteobacteriales; D_4__Burkholderiaceae; D_5__Cupriavidus									AS3		0	0	0	0	0	0	0	0	0.04559
2119	0	0	0	0	0	0	0	0	10	D_0__Bacteria; D_1__Proteobacteria; D_2__Alphaproteobacteria; D_3__Rhizobiales; D_4__Rhizobiaceae; D_5__Allorhizobium-Neorhizobium-Pararhizobium-Rhizobium									AS3		0	0	0	0	0	0	0	0	0.0350693
282	0	0	0	0	0	0	9	0	9	D_0__Bacteria; D_1__Proteobacteria; D_2__Alphaproteobacteria; D_3__Sphingomonadales; D_4__Sphingomonadaceae; D_5__Sphingobium									AS3		0	0	0	0	0	0	0.0315623	0	0.0315623
1529	0	0	0	0	0	0	0	0	9	D_0__Bacteria; D_1__Proteobacteria; D_2__Alphaproteobacteria; D_3__Rhizobiales; D_4__Rhizobiaceae; D_5__Allorhizobium-Neorhizobium-Pararhizobium-Rhizobium									AS3		0	0	0	0	0	0	0	0	0.0315623
2164	0	0	0	0	0	0	0	0	9	D_0__Bacteria; D_1__Proteobacteria; D_2__Gammaproteobacteria; D_3__Betaproteobacteriales; D_4__Burkholderiaceae; D_5__Cupriavidus									AS3		0	0	0	0	0	0	0	0	0.0315623
9856	0	0	0	0	0	0	0	0	9	D_0__Bacteria; D_1__Proteobacteria; D_2__Gammaproteobacteria; D_3__Betaproteobacteriales; D_4__Burkholderiaceae; D_5__Cupriavidus									AS3		0	0	0	0	0	0	0	0	0.0315623
4632	0	0	0	0	0	0	0	0	8	D_0__Bacteria; D_1__Proteobacteria; D_2__Gammaproteobacteria; D_3__Betaproteobacteriales; D_4__Burkholderiaceae; D_5__Cupriavidus									AS3		0	0	0	0	0	0	0	0	0.0280554
504	0	0	0	0	0	103	0	0	7	D_0__Bacteria; D_1__Proteobacteria; D_2__Alphaproteobacteria; D_3__Rhizobiales; D_4__Rhizobiaceae; D_5__Allorhizobium-Neorhizobium-Pararhizobium-Rhizobium						MIX			AS3		0	0	0	0	0	0.361213	0	0	0.0245485
3869	0	0	0	0	0	0	0	0	7	D_0__Bacteria; D_1__Proteobacteria; D_2__Gammaproteobacteria; D_3__Betaproteobacteriales; D_4__Burkholderiaceae; D_5__Cupriavidus									AS3		0	0	0	0	0	0	0	0	0.0245485
4993	0	0	0	0	0	0	0	0	7	D_0__Bacteria; D_1__Proteobacteria; D_2__Gammaproteobacteria; D_3__Betaproteobacteriales; D_4__Burkholderiaceae; D_5__Cupriavidus									AS3		0	0	0	0	0	0	0	0	0.0245485
7312	0	0	0	0	0	0	0	0	7	D_0__Bacteria; D_1__Proteobacteria; D_2__Gammaproteobacteria; D_3__Betaproteobacteriales; D_4__Burkholderiaceae; D_5__Cupriavidus									AS3		0	0	0	0	0	0	0	0	0.0245485
9455	0	0	0	0	0	0	0	0	7	D_0__Bacteria; D_1__Proteobacteria; D_2__Alphaproteobacteria; D_3__Rhizobiales; D_4__Rhizobiaceae; D_5__Allorhizobium-Neorhizobium-Pararhizobium-Rhizobium									AS3		0	0	0	0	0	0	0	0	0.0245485
10432	0	0	0	0	0	0	0	0	7	D_0__Bacteria; D_1__Proteobacteria; D_2__Alphaproteobacteria; D_3__Sphingomonadales; D_4__Sphingomonadaceae; D_5__Sphingobium									AS3		0	0	0	0	0	0	0	0	0.0245485
5168	0	0	0	0	0	1	0	0	6	D_0__Bacteria; D_1__Proteobacteria; D_2__Alphaproteobacteria; D_3__Rhizobiales; D_4__Rhizobiaceae; D_5__Allorhizobium-Neorhizobium-Pararhizobium-Rhizobium						MIX			AS3		0	0	0	0	0	0.00350693	0	0	0.0210416
2700	0	0	0	0	0	0	0	0	6	D_0__Bacteria; D_1__Firmicutes; D_2__Bacilli; D_3__Bacillales; D_4__Paenibacillaceae; D_5__Paenibacillus									AS3		0	0	0	0	0	0	0	0	0.0210416
5456	0	0	0	0	0	0	0	0	6	D_0__Bacteria; D_1__Proteobacteria; D_2__Gammaproteobacteria; D_3__Betaproteobacteriales; D_4__Burkholderiaceae; D_5__Cupriavidus									AS3		0	0	0	0	0	0	0	0	0.0210416
486	0	0	0	0	0	0	0	0	5	D_0__Bacteria; D_1__Proteobacteria; D_2__Gammaproteobacteria; D_3__Betaproteobacteriales; D_4__Burkholderiaceae; D_5__Cupriavidus									AS3		0	0	0	0	0	0	0	0	0.0175346
7248	0	0	0	0	0	0	0	0	5	D_0__Bacteria; D_1__Proteobacteria									AS3		0	0	0	0	0	0	0	0	0.0175346
7411	0	0	0	0	0	0	0	0	5	D_0__Bacteria; D_1__Proteobacteria; D_2__Alphaproteobacteria; D_3__Rhizobiales; D_4__Rhizobiaceae; D_5__Allorhizobium-Neorhizobium-Pararhizobium-Rhizobium									AS3		0	0	0	0	0	0	0	0	0.0175346
2068	0	0	0	0	0	0	0	0	4	D_0__Bacteria; D_1__Proteobacteria; D_2__Gammaproteobacteria; D_3__Betaproteobacteriales; D_4__Burkholderiaceae; D_5__Cupriavidus									AS3		0	0	0	0	0	0	0	0	0.0140277
4813	0	0	0	0	0	0	0	0	4	D_0__Bacteria; D_1__Proteobacteria; D_2__Gammaproteobacteria; D_3__Betaproteobacteriales; D_4__Burkholderiaceae; D_5__Cupriavidus									AS3		0	0	0	0	0	0	0	0	0.0140277
4238	0	0	0	0	0	0	11	0	3	D_0__Bacteria; D_1__Proteobacteria; D_2__Alphaproteobacteria; D_3__Sphingomonadales; D_4__Sphingomonadaceae; D_5__Sphingobium; Ambiguous_taxa									AS3		0	0	0	0	0	0	0.0385762	0	0.0105208
3863	0	0	0	0	0	0	0	0	3	D_0__Bacteria; D_1__Proteobacteria; D_2__Gammaproteobacteria; D_3__Betaproteobacteriales; D_4__Burkholderiaceae; D_5__Cupriavidus; Ambiguous_taxa									AS3		0	0	0	0	0	0	0	0	0.0105208
4644	0	0	0	0	0	0	0	0	3	D_0__Bacteria; D_1__Proteobacteria; D_2__Alphaproteobacteria; D_3__Rhizobiales; D_4__Rhizobiaceae; D_5__Allorhizobium-Neorhizobium-Pararhizobium-Rhizobium									AS3		0	0	0	0	0	0	0	0	0.0105208
5318	0	0	0	0	0	0	0	0	3	D_0__Bacteria; D_1__Proteobacteria; D_2__Alphaproteobacteria; D_3__Rhizobiales; D_4__Rhizobiaceae; D_5__Allorhizobium-Neorhizobium-Pararhizobium-Rhizobium									AS3		0	0	0	0	0	0	0	0	0.0105208
5872	0	0	0	0	0	0	0	0	3	D_0__Bacteria; D_1__Proteobacteria; D_2__Gammaproteobacteria; D_3__Betaproteobacteriales; D_4__Burkholderiaceae; D_5__Cupriavidus; Ambiguous_taxa									AS3		0	0	0	0	0	0	0	0	0.0105208
8901	0	0	0	0	1	0	0	0	2	D_0__Bacteria; D_1__Proteobacteria; D_2__Alphaproteobacteria; D_3__Rhizobiales; D_4__Rhizobiaceae; D_5__Allorhizobium-Neorhizobium-Pararhizobium-Rhizobium					BIC				AS3		0	0	0	0	0.00350693	0	0	0	0.00701385
4643	0	0	0	0	0	0	0	0	2	D_0__Bacteria; D_1__Proteobacteria; D_2__Gammaproteobacteria; D_3__Betaproteobacteriales; D_4__Burkholderiaceae; D_5__Cupriavidus									AS3		0	0	0	0	0	0	0	0	0.00701385
6756	0	0	0	0	0	0	0	0	2	D_0__Bacteria; D_1__Proteobacteria; D_2__Alphaproteobacteria; D_3__Rhizobiales; D_4__Rhizobiaceae; D_5__Allorhizobium-Neorhizobium-Pararhizobium-Rhizobium									AS3		0	0	0	0	0	0	0	0	0.00701385
7473	0	0	0	0	0	0	0	0	2	D_0__Bacteria; D_1__Proteobacteria; D_2__Gammaproteobacteria; D_3__Betaproteobacteriales; D_4__Burkholderiaceae; D_5__Cupriavidus									AS3		0	0	0	0	0	0	0	0	0.00701385
8574	0	0	0	0	0	0	0	0	2	D_0__Bacteria; D_1__Proteobacteria; D_2__Gammaproteobacteria; D_3__Betaproteobacteriales; D_4__Burkholderiaceae; D_5__Cupriavidus									AS3		0	0	0	0	0	0	0	0	0.00701385
8893	0	0	0	0	0	0	0	0	2	D_0__Bacteria; D_1__Proteobacteria; D_2__Gammaproteobacteria; D_3__Betaproteobacteriales; D_4__Burkholderiaceae; D_5__Cupriavidus									AS3		0	0	0	0	0	0	0	0	0.00701385
9470	0	0	0	0	0	0	0	0	2	D_0__Bacteria; D_1__Proteobacteria; D_2__Gammaproteobacteria; D_3__Betaproteobacteriales; D_4__Burkholderiaceae; D_5__Cupriavidus									AS3		0	0	0	0	0	0	0	0	0.00701385
1414	0	0	10	0	1	2	0	3152	0	D_0__Bacteria; D_1__Firmicutes; D_2__Clostridia; D_3__Clostridiales; D_4__Eubacteriaceae; D_5__Acetobacterium			FE		BIC	MIX		MN			0	0	0.0350693	0	0.00350693	0.00701385	0	11.0538	0
44	0	0	0	0	0	2	0	2151	0	D_0__Archaea; D_1__Diapherotrites; D_2__Micrarchaeia; D_3__uncultured archaeon; D_4__uncultured archaeon; D_5__uncultured archaeon; D_6__uncultured archaeon						MIX		MN			0	0	0	0	0	0.00701385	0	7.5434	0
10581	0	0	0	0	1	1	0	1001	0	D_0__Bacteria; D_1__Verrucomicrobia; D_2__Verrucomicrobiae; D_3__B29; D_4__uncultured bacterium; D_5__uncultured bacterium; D_6__uncultured bacterium					BIC	MIX		MN			0	0	0	0	0.00350693	0.00350693	0	3.51043	0
4599	0	0	0	0	0	0	0	975	0	D_0__Archaea; D_1__Crenarchaeota; D_2__Bathyarchaeia; Ambiguous_taxa; Ambiguous_taxa; Ambiguous_taxa; Ambiguous_taxa								MN			0	0	0	0	0	0	0	3.41925	0
27	0	658	72	0	2	1	0	846	0	D_0__Bacteria; D_1__Bacteroidetes; D_2__Ignavibacteria; D_3__SJA-28		NT	FE		BIC	MIX		MN			0	2.30756	0.252499	0	0.00701385	0.00350693	0	2.96686	0
78	0	0	2	0	0	1	0	569	0	D_0__Bacteria; D_1__Bacteroidetes; D_2__Bacteroidia; D_3__Sphingobacteriales; D_4__Lentimicrobiaceae			FE			MIX		MN			0	0	0.00701385	0	0	0.00350693	0	1.99544	0
57	0	0	0	0	257	0	1	389	0	D_0__Archaea; D_1__Euryarchaeota; D_2__Methanomicrobia; D_3__Methanomicrobiales; D_4__Methanoregulaceae; D_5__Methanoregula					BIC			MN			0	0	0	0	0.90128	0	0.00350693	1.36419	0
9169	0	1	0	0	0	12	0	351	0	D_0__Bacteria; D_1__Proteobacteria; D_2__Gammaproteobacteria; D_3__Betaproteobacteriales; D_4__Rhodocyclaceae		NT				MIX		MN			0	0.00350693	0	0	0	0.0420831	0	1.23093	0
2228	0	2	0	0	1	2	1	296	0	D_0__Bacteria; D_1__Proteobacteria; D_2__Gammaproteobacteria; D_3__Betaproteobacteriales; D_4__Rhodocyclaceae; D_5__Dechloromonas; Ambiguous_taxa		NT			BIC	MIX		MN			0	0.00701385	0	0	0.00350693	0.00701385	0.00350693	1.03805	0
7349	0	0	0	0	0	0	0	252	0	D_0__Bacteria; D_1__Proteobacteria; D_2__Gammaproteobacteria; D_3__Betaproteobacteriales; D_4__Rhodocyclaceae; D_5__Dechloromonas								MN			0	0	0	0	0	0	0	0.883745	0
1231	0	0	0	0	0	0	0	200	0	D_0__Archaea; D_1__Crenarchaeota; D_2__Bathyarchaeia; Ambiguous_taxa; Ambiguous_taxa; Ambiguous_taxa; Ambiguous_taxa								MN			0	0	0	0	0	0	0	0.701385	0
108	0	0	0	0	0	0	0	195	0	D_0__Bacteria; D_1__Spirochaetes; D_2__Spirochaetia; D_3__Spirochaetales; D_4__Spirochaetaceae; D_5__uncultured; D_6__uncultured bacterium								MN			0	0	0	0	0	0	0	0.683851	0
3699	0	0	0	0	1044	0	0	189	0	D_0__Bacteria; D_1__Proteobacteria; D_2__Alphaproteobacteria; D_3__Caulobacterales; D_4__Caulobacteraceae; D_5__Phenylobacterium					BIC			MN			0	0	0	0	3.66123	0	0	0.662809	0
115	0	129	17	0	1	0	0	155	0	D_0__Bacteria; D_1__Bacteroidetes; D_2__Ignavibacteria; D_3__SJA-28		NT	FE		BIC			MN			0	0.452393	0.0596177	0	0.00350693	0	0	0.543574	0
159	0	0	0	0	4	0	0	103	0	D_0__Bacteria; D_1__Bacteroidetes; D_2__Ignavibacteria; D_3__Ignavibacteriales					BIC			MN			0	0	0	0	0.0140277	0	0	0.361213	0
7130	0	0	0	0	0	0	0	103	0	D_0__Bacteria; D_1__Firmicutes; D_2__Clostridia; D_3__Clostridiales; D_4__Eubacteriaceae; D_5__Acetobacterium								MN			0	0	0	0	0	0	0	0.361213	0
9225	0	0	0	0	119	0	0	93	0	D_0__Archaea; D_1__Euryarchaeota; D_2__Methanomicrobia; D_3__Methanomicrobiales; D_4__Methanoregulaceae; D_5__Methanoregula					BIC			MN			0	0	0	0	0.417324	0	0	0.326144	0
7132	0	75	0	0	0	0	0	93	0	D_0__Bacteria; D_1__Bacteroidetes; D_2__Ignavibacteria; D_3__SJA-28		NT						MN			0	0.263019	0	0	0	0	0	0.326144	0
3057	0	0	0	0	0	0	0	90	0	D_0__Bacteria; D_1__Spirochaetes; D_2__Spirochaetia; D_3__Spirochaetales; D_4__Spirochaetaceae; D_5__uncultured								MN			0	0	0	0	0	0	0	0.315623	0
225	0	0	0	0	0	0	0	88	0	D_0__Bacteria; D_1__Proteobacteria; D_2__Deltaproteobacteria; D_3__Deltaproteobacteria Incertae Sedis; D_4__Syntrophorhabdaceae; D_5__Syntrophorhabdus								MN			0	0	0	0	0	0	0	0.30861	0
1097	0	1	0	0	0	0	0	86	0	D_0__Bacteria; D_1__Proteobacteria; D_2__Gammaproteobacteria; D_3__Betaproteobacteriales; D_4__Rhodocyclaceae		NT						MN			0	0.00350693	0	0	0	0	0	0.301596	0
1075	0	0	0	0	0	0	0	83	0	D_0__Bacteria; D_1__Proteobacteria; D_2__Gammaproteobacteria; D_3__Betaproteobacteriales; D_4__Rhodocyclaceae								MN			0	0	0	0	0	0	0	0.291075	0
197	0	0	0	0	0	0	1	82	0	D_0__Bacteria; D_1__Proteobacteria; D_2__Deltaproteobacteria; D_3__Myxococcales								MN			0	0	0	0	0	0	0.00350693	0.287568	0
10513	0	0	0	0	0	1	0	78	0	D_0__Archaea; D_1__Euryarchaeota; D_2__Methanomicrobia; D_3__Methanomicrobiales; D_4__Methanoregulaceae; D_5__Methanoregula; D_6__uncultured archaeon						MIX		MN			0	0	0	0	0	0.00350693	0	0.27354	0
10675	0	0	0	0	0	0	0	74	0	D_0__Bacteria; D_1__Firmicutes; D_2__Clostridia; D_3__Clostridiales; D_4__Eubacteriaceae; D_5__Acetobacterium								MN			0	0	0	0	0	0	0	0.259513	0
2386	0	0	0	0	0	0	0	73	0	D_0__Bacteria; D_1__Firmicutes; D_2__Clostridia; D_3__Clostridiales; D_4__Eubacteriaceae; D_5__Acetobacterium								MN			0	0	0	0	0	0	0	0.256006	0
195	0	0	0	0	0	0	0	70	0	D_0__Bacteria; D_1__Verrucomicrobia; D_2__Verrucomicrobiae; D_3__Pedosphaerales; D_4__Pedosphaeraceae								MN			0	0	0	0	0	0	0	0.245485	0
2780	0	0	0	0	0	7	0	69	0	D_0__Bacteria; D_1__Spirochaetes; D_2__Spirochaetia; D_3__Spirochaetales; D_4__Spirochaetaceae; D_5__uncultured						MIX		MN			0	0	0	0	0	0.0245485	0	0.241978	0
261	0	0	0	0	5	0	0	67	0	D_0__Bacteria; D_1__Firmicutes; D_2__Clostridia; D_3__Clostridiales; D_4__Clostridiaceae 1; D_5__Fonticella; D_6__uncultured bacterium					BIC			MN			0	0	0	0	0.0175346	0	0	0.234964	0
2560	0	0	0	0	1	0	0	64	0	D_0__Bacteria; D_1__Proteobacteria; D_2__Gammaproteobacteria; D_3__Betaproteobacteriales; D_4__Rhodocyclaceae					BIC			MN			0	0	0	0	0.00350693	0	0	0.224443	0
268	0	0	0	0	0	0	0	61	0	D_0__Bacteria; D_1__Proteobacteria; D_2__Deltaproteobacteria; D_3__Syntrophobacterales; D_4__Syntrophaceae; D_5__uncultured								MN			0	0	0	0	0	0	0	0.213922	0
6691	0	0	0	0	0	0	0	61	0	D_0__Bacteria; D_1__Proteobacteria; D_2__Deltaproteobacteria; D_3__Desulfuromonadales; D_4__Geobacteraceae; D_5__Geobacter								MN			0	0	0	0	0	0	0	0.213922	0
1949	0	0	0	0	0	1	0	60	0	D_0__Bacteria; D_1__Proteobacteria; D_2__Gammaproteobacteria; D_3__Betaproteobacteriales; D_4__Rhodocyclaceae; D_5__Dechloromonas; Ambiguous_taxa						MIX		MN			0	0	0	0	0	0.00350693	0	0.210416	0
3720	0	2	0	0	1	17	0	56	0	D_0__Bacteria; D_1__Proteobacteria; D_2__Gammaproteobacteria; D_3__Betaproteobacteriales; D_4__Rhodocyclaceae		NT			BIC	MIX		MN			0	0.00701385	0	0	0.00350693	0.0596177	0	0.196388	0
7950	0	0	0	0	0	0	0	54	0	D_0__Bacteria; D_1__Firmicutes; D_2__Clostridia; D_3__Clostridiales; D_4__Eubacteriaceae; D_5__Acetobacterium								MN			0	0	0	0	0	0	0	0.189374	0
2524	0	0	0	0	0	0	0	43	0	D_0__Bacteria; D_1__Proteobacteria; D_2__Gammaproteobacteria; D_3__Betaproteobacteriales; D_4__Rhodocyclaceae								MN			0	0	0	0	0	0	0	0.150798	0
5702	0	43	8	0	2	0	0	42	0	D_0__Bacteria; D_1__Bacteroidetes; D_2__Ignavibacteria; D_3__SJA-28		NT	FE		BIC			MN			0	0.150798	0.0280554	0	0.00701385	0	0	0.147291	0
841	0	0	0	0	0	0	0	41	0	D_0__Archaea; D_1__Euryarchaeota; D_2__Methanomicrobia; D_3__Methanosarcinales; D_4__Methanosarcinaceae; D_5__Methanosarcina								MN			0	0	0	0	0	0	0	0.143784	0
54	0	0	0	0	0	0	0	37	0	D_0__Bacteria; D_1__Verrucomicrobia; D_2__Verrucomicrobiae; D_3__B29; D_4__uncultured bacterium; D_5__uncultured bacterium; D_6__uncultured bacterium								MN			0	0	0	0	0	0	0	0.129756	0
7282	0	0	0	0	0	0	0	36	0	D_0__Bacteria; D_1__Bacteroidetes; D_2__Bacteroidia; D_3__Sphingobacteriales; D_4__Lentimicrobiaceae								MN			0	0	0	0	0	0	0	0.126249	0
28	0	0	1	0	0	0	0	34	0	D_0__Bacteria; D_1__Firmicutes; D_2__Clostridia; D_3__Clostridiales; D_4__Eubacteriaceae; D_5__Acetobacterium			FE					MN			0	0	0.00350693	0	0	0	0	0.119235	0
392	0	0	0	0	0	0	0	34	0	D_0__Bacteria; D_1__Elusimicrobia; D_2__Elusimicrobia; D_3__Lineage IV								MN			0	0	0	0	0	0	0	0.119235	0
2891	0	0	0	0	0	0	0	32	0	D_0__Bacteria; D_1__Spirochaetes; D_2__Spirochaetia; D_3__Spirochaetales; D_4__Spirochaetaceae; D_5__uncultured; Ambiguous_taxa								MN			0	0	0	0	0	0	0	0.112222	0
8091	0	0	0	0	0	0	0	32	0	D_0__Bacteria; D_1__Firmicutes; D_2__Clostridia; D_3__Clostridiales; D_4__Eubacteriaceae; D_5__Acetobacterium								MN			0	0	0	0	0	0	0	0.112222	0
1849	0	0	0	0	0	0	0	31	0	D_0__Bacteria; D_1__Bacteroidetes; D_2__Bacteroidia; D_3__Sphingobacteriales; D_4__Lentimicrobiaceae								MN			0	0	0	0	0	0	0	0.108715	0
4769	0	0	0	0	16	0	0	30	0	D_0__Archaea; D_1__Euryarchaeota; D_2__Methanomicrobia; D_3__Methanomicrobiales; D_4__Methanoregulaceae; D_5__Methanoregula					BIC			MN			0	0	0	0	0.0561108	0	0	0.105208	0
471	0	0	0	0	0	0	0	30	0	D_0__Bacteria; D_1__Proteobacteria; D_2__Gammaproteobacteria; D_3__Betaproteobacteriales; D_4__Rhodocyclaceae								MN			0	0	0	0	0	0	0	0.105208	0
1942	0	0	0	0	3	2	0	29	0	D_0__Bacteria; D_1__Spirochaetes; D_2__Spirochaetia; D_3__Spirochaetales; D_4__Spirochaetaceae; D_5__uncultured; Ambiguous_taxa					BIC	MIX		MN			0	0	0	0	0.0105208	0.00701385	0	0.101701	0
34	0	0	0	0	86	0	0	29	0	D_0__Bacteria; D_1__Proteobacteria; D_2__Alphaproteobacteria; D_3__Caulobacterales; D_4__Caulobacteraceae; D_5__Phenylobacterium					BIC			MN			0	0	0	0	0.301596	0	0	0.101701	0
53	0	0	0	0	0	0	0	29	0	D_0__Archaea; D_1__Crenarchaeota; D_2__Bathyarchaeia; Ambiguous_taxa; Ambiguous_taxa; Ambiguous_taxa; Ambiguous_taxa								MN			0	0	0	0	0	0	0	0.101701	0
2912	0	0	0	0	0	0	0	28	0	D_0__Archaea; D_1__Crenarchaeota; D_2__Bathyarchaeia; Ambiguous_taxa; Ambiguous_taxa; Ambiguous_taxa; Ambiguous_taxa								MN			0	0	0	0	0	0	0	0.0981939	0
7460	0	1	0	0	0	0	0	27	0	D_0__Bacteria; D_1__Proteobacteria; D_2__Gammaproteobacteria; D_3__Betaproteobacteriales; D_4__Rhodocyclaceae		NT						MN			0	0.00350693	0	0	0	0	0	0.094687	0
336	0	0	0	0	0	0	0	27	0	D_0__Bacteria; D_1__Patescibacteria; D_2__Gracilibacteria								MN			0	0	0	0	0	0	0	0.094687	0
1374	0	0	0	0	0	0	0	27	0	D_0__Bacteria; D_1__Spirochaetes; D_2__Spirochaetia; D_3__Spirochaetales; D_4__Spirochaetaceae; D_5__uncultured; Ambiguous_taxa								MN			0	0	0	0	0	0	0	0.094687	0
7467	0	0	0	0	0	0	0	27	0	D_0__Bacteria; D_1__Firmicutes; D_2__Negativicutes; D_3__Selenomonadales; D_4__Veillonellaceae; D_5__uncultured								MN			0	0	0	0	0	0	0	0.094687	0
8621	0	0	0	0	0	0	0	26	0	D_0__Bacteria; D_1__Proteobacteria; D_2__Gammaproteobacteria; D_3__Betaproteobacteriales; D_4__Rhodocyclaceae								MN			0	0	0	0	0	0	0	0.0911801	0
2495	0	0	0	0	0	3008	2	25	0	D_0__Bacteria; D_1__Proteobacteria; D_2__Deltaproteobacteria; D_3__Desulfuromonadales; D_4__Geobacteraceae; D_5__Geobacter						MIX		MN			0	0	0	0	0	10.5488	0.00701385	0.0876732	0
3966	0	23	6	0	0	0	0	24	0	D_0__Bacteria; D_1__Bacteroidetes; D_2__Ignavibacteria; D_3__SJA-28		NT	FE					MN			0	0.0806593	0.0210416	0	0	0	0	0.0841662	0
396	0	0	0	0	0	0	0	24	0	D_0__Bacteria; D_1__Bacteroidetes; D_2__Bacteroidia; D_3__Bacteroidales; D_4__Rikenellaceae; D_5__Blvii28 wastewater-sludge group; Ambiguous_taxa								MN			0	0	0	0	0	0	0	0.0841662	0
506	0	0	0	0	0	0	0	23	0	D_0__Bacteria; D_1__Proteobacteria; D_2__Deltaproteobacteria; D_3__Syntrophobacterales; D_4__Syntrophaceae; D_5__Smithella; Ambiguous_taxa								MN			0	0	0	0	0	0	0	0.0806593	0
7083	0	0	0	0	13	0	0	22	0	D_0__Archaea; D_1__Euryarchaeota; D_2__Methanomicrobia; D_3__Methanomicrobiales; D_4__Methanoregulaceae; D_5__Methanoregula					BIC			MN			0	0	0	0	0.04559	0	0	0.0771524	0
131	0	2	0	0	74	0	0	21	0	D_0__Bacteria; D_1__Acidobacteria; D_2__Holophagae; D_3__Subgroup 7		NT			BIC			MN			0	0.00701385	0	0	0.259513	0	0	0.0736454	0
5586	0	0	0	0	0	0	0	20	0	D_0__Bacteria; D_1__Acidobacteria; D_2__Acidobacteriia; D_3__Solibacterales; D_4__Solibacteraceae (Subgroup 3); D_5__Paludibaculum								MN			0	0	0	0	0	0	0	0.0701385	0
1805	0	0	0	0	0	1	0	19	0	D_0__Bacteria; D_1__Spirochaetes; D_2__Spirochaetia; D_3__Spirochaetales; D_4__Spirochaetaceae; D_5__uncultured; Ambiguous_taxa						MIX		MN			0	0	0	0	0	0.00350693	0	0.0666316	0
485	0	0	0	0	0	0	0	19	0	D_0__Bacteria; D_1__Acidobacteria; D_2__Acidobacteriia; D_3__Solibacterales; D_4__Solibacteraceae (Subgroup 3); D_5__Bryobacter								MN			0	0	0	0	0	0	0	0.0666316	0
557	0	0	0	0	0	0	0	18	0	D_0__Bacteria; D_1__Bacteroidetes; D_2__Ignavibacteria; D_3__Ignavibacteriales								MN			0	0	0	0	0	0	0	0.0631247	0
623	0	1	0	0	0	1	1	17	0	D_0__Bacteria; D_1__Proteobacteria; D_2__Gammaproteobacteria; D_3__Betaproteobacteriales; D_4__Rhodocyclaceae		NT				MIX		MN			0	0.00350693	0	0	0	0.00350693	0.00350693	0.0596177	0
6961	0	0	0	0	0	2	0	17	0	D_0__Bacteria; D_1__Proteobacteria; D_2__Gammaproteobacteria; D_3__Betaproteobacteriales; D_4__Rhodocyclaceae; D_5__Dechloromonas; Ambiguous_taxa						MIX		MN			0	0	0	0	0	0.00701385	0	0.0596177	0
5330	0	0	0	0	0	0	0	17	0	D_0__Archaea; D_1__Euryarchaeota; D_2__Methanomicrobia; D_3__Methanosarcinales; D_4__Methanosarcinaceae; D_5__Methanosarcina								MN			0	0	0	0	0	0	0	0.0596177	0
5583	0	17	2	0	0	1	0	16	0	D_0__Bacteria; D_1__Bacteroidetes; D_2__Ignavibacteria; D_3__SJA-28		NT	FE			MIX		MN			0	0.0596177	0.00701385	0	0	0.00350693	0	0.0561108	0
8335	0	1	0	0	0	0	2	15	0	D_0__Bacteria; D_1__Proteobacteria; D_2__Gammaproteobacteria; D_3__Betaproteobacteriales; D_4__Rhodocyclaceae		NT						MN			0	0.00350693	0	0	0	0	0.00701385	0.0526039	0
390	0	0	0	0	15	0	0	15	0	D_0__Bacteria; D_1__Proteobacteria; D_2__Alphaproteobacteria					BIC			MN			0	0	0	0	0.0526039	0	0	0.0526039	0
607	0	0	0	0	0	1	0	14	0	D_0__Bacteria; D_1__Bacteroidetes; D_2__Bacteroidia; D_3__Bacteroidales; D_4__Prolixibacteraceae; D_5__WCHB1-32						MIX		MN			0	0	0	0	0	0.00350693	0	0.049097	0
624	0	0	0	0	0	0	0	14	0	D_0__Bacteria; D_1__Firmicutes; D_2__Clostridia; D_3__Clostridiales; D_4__Syntrophomonadaceae; D_5__uncultured; D_6__thermophilic bacterium JA2								MN			0	0	0	0	0	0	0	0.049097	0
8713	0	0	0	0	0	0	0	14	0	D_0__Archaea; D_1__Crenarchaeota; D_2__Bathyarchaeia								MN			0	0	0	0	0	0	0	0.049097	0
9366	0	0	0	0	0	0	0	14	0	D_0__Bacteria; D_1__Proteobacteria; D_2__Gammaproteobacteria; D_3__Betaproteobacteriales; D_4__Rhodocyclaceae; D_5__Dechloromonas; Ambiguous_taxa								MN			0	0	0	0	0	0	0	0.049097	0
519	0	0	0	0	0	0	0	13	0	D_0__Bacteria; D_1__Firmicutes; D_2__Clostridia; D_3__Clostridiales; D_4__Eubacteriaceae; D_5__Acetobacterium								MN			0	0	0	0	0	0	0	0.04559	0
728	0	0	0	0	0	0	0	12	0	D_0__Bacteria; D_1__Chloroflexi; D_2__Anaerolineae; D_3__Anaerolineales; D_4__Anaerolineaceae								MN			0	0	0	0	0	0	0	0.0420831	0
8280	0	0	0	0	0	0	0	12	0	D_0__Archaea; D_1__Diapherotrites; D_2__Micrarchaeia; D_3__uncultured archaeon; D_4__uncultured archaeon; D_5__uncultured archaeon; D_6__uncultured archaeon								MN			0	0	0	0	0	0	0	0.0420831	0
6587	0	0	0	0	0	0	0	11	0	D_0__Bacteria; D_1__Spirochaetes; D_2__Spirochaetia; D_3__Spirochaetales; D_4__Spirochaetaceae; D_5__uncultured								MN			0	0	0	0	0	0	0	0.0385762	0
6974	0	0	0	0	0	0	0	11	0	D_0__Bacteria; D_1__Firmicutes; D_2__Clostridia; D_3__Clostridiales; D_4__Eubacteriaceae; D_5__Acetobacterium								MN			0	0	0	0	0	0	0	0.0385762	0
9375	0	0	0	0	0	0	0	11	0	D_0__Bacteria; D_1__Spirochaetes; D_2__Spirochaetia; D_3__Spirochaetales; D_4__Spirochaetaceae; D_5__uncultured								MN			0	0	0	0	0	0	0	0.0385762	0
3781	0	0	0	0	9	0	8	10	0	D_0__Archaea; D_1__Euryarchaeota; D_2__Methanomicrobia; D_3__Methanomicrobiales; D_4__Methanoregulaceae; D_5__Methanoregula					BIC			MN			0	0	0	0	0.0315623	0	0.0280554	0.0350693	0
6659	0	0	0	0	47	0	0	10	0	D_0__Bacteria; D_1__Proteobacteria; D_2__Alphaproteobacteria; D_3__Caulobacterales; D_4__Caulobacteraceae; D_5__Phenylobacterium					BIC			MN			0	0	0	0	0.164826	0	0	0.0350693	0
864	0	0	0	0	0	0	0	10	0	D_0__Bacteria; D_1__Patescibacteria; D_2__ABY1; D_3__Candidatus Magasanikbacteria								MN			0	0	0	0	0	0	0	0.0350693	0
2420	0	0	0	0	0	0	0	10	0	D_0__Bacteria; D_1__Firmicutes; D_2__Clostridia; D_3__Clostridiales; D_4__Eubacteriaceae; D_5__Acetobacterium								MN			0	0	0	0	0	0	0	0.0350693	0
2850	0	0	0	0	0	0	0	10	0	D_0__Bacteria; D_1__Verrucomicrobia; D_2__Verrucomicrobiae; D_3__B29; D_4__uncultured bacterium; D_5__uncultured bacterium; D_6__uncultured bacterium								MN			0	0	0	0	0	0	0	0.0350693	0
6983	0	1260	388	0	15	0	0	9	0	D_0__Bacteria; D_1__Proteobacteria; D_2__Gammaproteobacteria; D_3__Betaproteobacteriales; D_4__Rhodocyclaceae; D_5__Azospira		NT	FE		BIC			MN			0	4.41873	1.36069	0	0.0526039	0	0	0.0315623	0
1309	0	0	0	0	0	0	0	9	0	D_0__Bacteria; D_1__Verrucomicrobia; D_2__Verrucomicrobiae; D_3__Opitutales; D_4__Opitutaceae								MN			0	0	0	0	0	0	0	0.0315623	0
2739	0	0	0	0	1	1	0	8	0	D_0__Bacteria; D_1__Spirochaetes; D_2__Spirochaetia; D_3__Spirochaetales; D_4__Spirochaetaceae; D_5__uncultured; Ambiguous_taxa					BIC	MIX		MN			0	0	0	0	0.00350693	0.00350693	0	0.0280554	0
2998	0	0	0	0	0	1	0	8	0	D_0__Bacteria; D_1__Proteobacteria; D_2__Gammaproteobacteria; D_3__Betaproteobacteriales; D_4__Rhodocyclaceae						MIX		MN			0	0	0	0	0	0.00350693	0	0.0280554	0
8108	0	5	0	0	0	0	0	8	0	D_0__Bacteria; D_1__Bacteroidetes; D_2__Ignavibacteria; D_3__SJA-28		NT						MN			0	0.0175346	0	0	0	0	0	0.0280554	0
1177	0	2	0	0	0	0	0	8	0	D_0__Bacteria		NT						MN			0	0.00701385	0	0	0	0	0	0.0280554	0
585	0	0	0	0	0	0	0	8	0	D_0__Bacteria; D_1__Proteobacteria; D_2__Gammaproteobacteria; D_3__Betaproteobacteriales; D_4__Rhodocyclaceae								MN			0	0	0	0	0	0	0	0.0280554	0
1476	0	0	0	0	0	0	0	8	0	D_0__Bacteria; D_1__Acidobacteria; D_2__Acidobacteriia; D_3__Solibacterales; D_4__Solibacteraceae (Subgroup 3); D_5__Candidatus Solibacter								MN			0	0	0	0	0	0	0	0.0280554	0
7005	0	3	0	0	0	1	0	7	0	D_0__Bacteria; D_1__Proteobacteria; D_2__Gammaproteobacteria; D_3__Betaproteobacteriales; D_4__Rhodocyclaceae		NT				MIX		MN			0	0.0105208	0	0	0	0.00350693	0	0.0245485	0
636	0	0	0	0	11	0	0	7	0	D_0__Archaea; D_1__Euryarchaeota; D_2__Methanomicrobia; D_3__Methanomicrobiales; D_4__Methanoregulaceae; D_5__Methanoregula					BIC			MN			0	0	0	0	0.0385762	0	0	0.0245485	0
449	0	0	0	0	0	0	0	7	0	D_0__Bacteria; D_1__Acidobacteria; D_2__Acidobacteriia; D_3__Solibacterales; D_4__Solibacteraceae (Subgroup 3); D_5__Paludibaculum; D_6__uncultured soil bacterium								MN			0	0	0	0	0	0	0	0.0245485	0
897	0	0	0	0	0	0	0	7	0	D_0__Bacteria; D_1__Firmicutes; D_2__Negativicutes; D_3__Selenomonadales; D_4__Veillonellaceae; D_5__uncultured								MN			0	0	0	0	0	0	0	0.0245485	0
1042	0	0	0	0	0	0	0	7	0	D_0__Bacteria; D_1__Firmicutes; D_2__Clostridia; D_3__Clostridiales; D_4__Eubacteriaceae; D_5__Acetobacterium								MN			0	0	0	0	0	0	0	0.0245485	0
1118	0	0	0	0	0	0	0	7	0	D_0__Bacteria; D_1__Bacteroidetes; D_2__Ignavibacteria; D_3__Ignavibacteriales; D_4__BSV40								MN			0	0	0	0	0	0	0	0.0245485	0
2480	0	0	0	0	0	0	0	7	0	D_0__Bacteria; D_1__Proteobacteria; D_2__Gammaproteobacteria; D_3__Betaproteobacteriales; D_4__Rhodocyclaceae								MN			0	0	0	0	0	0	0	0.0245485	0
7154	0	0	0	0	0	1	0	6	0	D_0__Bacteria; D_1__Proteobacteria; D_2__Gammaproteobacteria; D_3__Betaproteobacteriales; D_4__Rhodocyclaceae						MIX		MN			0	0	0	0	0	0.00350693	0	0.0210416	0
251	0	0	0	0	0	0	0	6	0	D_0__Bacteria; D_1__Proteobacteria; D_2__Deltaproteobacteria; D_3__Desulfuromonadales; D_4__Geobacteraceae; D_5__Geobacter								MN			0	0	0	0	0	0	0	0.0210416	0
1808	0	0	0	0	0	0	0	6	0	D_0__Bacteria; D_1__Firmicutes; D_2__Clostridia; D_3__Clostridiales; D_4__Eubacteriaceae; D_5__Acetobacterium								MN			0	0	0	0	0	0	0	0.0210416	0
2298	0	0	0	0	0	0	0	6	0	D_0__Bacteria; D_1__Firmicutes; D_2__Clostridia; D_3__Clostridiales; D_4__Eubacteriaceae; D_5__Acetobacterium								MN			0	0	0	0	0	0	0	0.0210416	0
1586	0	0	0	0	0	1	0	5	0	D_0__Bacteria; D_1__Spirochaetes; D_2__Spirochaetia; D_3__Spirochaetales; D_4__Spirochaetaceae; D_5__uncultured						MIX		MN			0	0	0	0	0	0.00350693	0	0.0175346	0
4384	0	0	0	0	0	1	0	5	0	D_0__Bacteria; D_1__Proteobacteria; D_2__Gammaproteobacteria; D_3__Betaproteobacteriales; D_4__Rhodocyclaceae						MIX		MN			0	0	0	0	0	0.00350693	0	0.0175346	0
1120	0	0	0	0	0	0	0	5	0	D_0__Bacteria; D_1__Bacteroidetes; D_2__Ignavibacteria; D_3__OPB56; D_4__uncultured bacterium; D_5__uncultured bacterium; D_6__uncultured bacterium								MN			0	0	0	0	0	0	0	0.0175346	0
1321	0	0	0	0	0	0	0	5	0	D_0__Bacteria								MN			0	0	0	0	0	0	0	0.0175346	0
1770	0	0	0	0	0	0	0	5	0	D_0__Bacteria; D_1__Firmicutes; D_2__Clostridia; D_3__Clostridiales; D_4__Peptostreptococcaceae								MN			0	0	0	0	0	0	0	0.0175346	0
1951	0	0	0	0	0	0	0	5	0	D_0__Bacteria; D_1__Firmicutes; D_2__Clostridia; D_3__Clostridiales; D_4__Eubacteriaceae; D_5__Acetobacterium								MN			0	0	0	0	0	0	0	0.0175346	0
2030	0	0	0	0	0	0	0	5	0	D_0__Bacteria; D_1__Proteobacteria; D_2__Gammaproteobacteria; D_3__Betaproteobacteriales; D_4__Rhodocyclaceae								MN			0	0	0	0	0	0	0	0.0175346	0
2203	0	0	0	0	0	0	0	5	0	D_0__Bacteria; D_1__Firmicutes; D_2__Clostridia; D_3__Clostridiales; D_4__Christensenellaceae; D_5__Christensenellaceae R-7 group								MN			0	0	0	0	0	0	0	0.0175346	0
2394	0	0	0	0	0	0	0	5	0	D_0__Archaea; D_1__Crenarchaeota; D_2__Bathyarchaeia; Ambiguous_taxa; Ambiguous_taxa; Ambiguous_taxa; Ambiguous_taxa								MN			0	0	0	0	0	0	0	0.0175346	0
2914	0	0	0	0	0	0	0	5	0	D_0__Archaea; D_1__Euryarchaeota; D_2__Methanomicrobia; D_3__Methanosarcinales; D_4__Methanosarcinaceae; D_5__Methanosarcina								MN			0	0	0	0	0	0	0	0.0175346	0
7323	0	0	0	0	0	0	0	5	0	D_0__Bacteria; D_1__Spirochaetes; D_2__Spirochaetia; D_3__Spirochaetales; D_4__Spirochaetaceae; D_5__uncultured								MN			0	0	0	0	0	0	0	0.0175346	0
348	0	0	0	0	4	0	0	4	0	D_0__Archaea; D_1__Euryarchaeota; D_2__Methanomicrobia; D_3__Methanomicrobiales; D_4__Methanoregulaceae; D_5__Methanoregula					BIC			MN			0	0	0	0	0.0140277	0	0	0.0140277	0
1139	0	0	0	0	0	0	0	4	0	D_0__Bacteria; D_1__Proteobacteria; D_2__Deltaproteobacteria; D_3__Myxococcales; D_4__Archangiaceae; D_5__Anaeromyxobacter; D_6__uncultured soil bacterium								MN			0	0	0	0	0	0	0	0.0140277	0
1159	0	0	0	0	0	0	0	4	0	D_0__Bacteria; D_1__Acidobacteria; D_2__Acidobacteriia; D_3__Solibacterales; D_4__Solibacteraceae (Subgroup 3); D_5__Paludibaculum; Ambiguous_taxa								MN			0	0	0	0	0	0	0	0.0140277	0
1260	0	0	0	0	0	0	0	4	0	D_0__Bacteria; D_1__Chloroflexi; D_2__Anaerolineae; D_3__Anaerolineales; D_4__Anaerolineaceae; D_5__Anaerolinea								MN			0	0	0	0	0	0	0	0.0140277	0
1463	0	0	0	0	0	0	0	4	0	D_0__Bacteria; D_1__Spirochaetes; D_2__Spirochaetia; D_3__Spirochaetales; D_4__Spirochaetaceae; D_5__uncultured								MN			0	0	0	0	0	0	0	0.0140277	0
1515	0	0	0	0	0	0	0	4	0	D_0__Bacteria; D_1__Proteobacteria; D_2__Gammaproteobacteria; D_3__Betaproteobacteriales; D_4__Rhodocyclaceae								MN			0	0	0	0	0	0	0	0.0140277	0
1598	0	0	0	0	0	0	0	4	0	D_0__Bacteria; D_1__Firmicutes; D_2__Clostridia; D_3__Clostridiales; D_4__Peptostreptococcaceae; D_5__Sporacetigenium; Ambiguous_taxa								MN			0	0	0	0	0	0	0	0.0140277	0
1774	0	0	0	0	0	0	0	4	0	D_0__Bacteria; D_1__Bacteroidetes; D_2__Bacteroidia; D_3__Sphingobacteriales; D_4__Lentimicrobiaceae; Ambiguous_taxa; Ambiguous_taxa								MN			0	0	0	0	0	0	0	0.0140277	0
1819	0	0	0	0	0	0	0	4	0	D_0__Bacteria								MN			0	0	0	0	0	0	0	0.0140277	0
1889	0	0	0	0	0	0	0	4	0	D_0__Bacteria; D_1__Chloroflexi; D_2__Anaerolineae								MN			0	0	0	0	0	0	0	0.0140277	0
1943	0	0	0	0	0	0	0	4	0	D_0__Bacteria; D_1__Firmicutes; D_2__Negativicutes; D_3__Selenomonadales; D_4__Veillonellaceae; D_5__uncultured								MN			0	0	0	0	0	0	0	0.0140277	0
2357	0	0	0	0	0	0	0	4	0	D_0__Archaea; D_1__Crenarchaeota; D_2__Bathyarchaeia; Ambiguous_taxa; Ambiguous_taxa; Ambiguous_taxa; Ambiguous_taxa								MN			0	0	0	0	0	0	0	0.0140277	0
2767	0	0	0	0	0	0	0	4	0	D_0__Bacteria; D_1__Verrucomicrobia; D_2__Verrucomicrobiae; D_3__B29; D_4__uncultured bacterium; D_5__uncultured bacterium; D_6__uncultured bacterium								MN			0	0	0	0	0	0	0	0.0140277	0
3479	0	0	0	0	0	0	0	4	0	D_0__Bacteria								MN			0	0	0	0	0	0	0	0.0140277	0
5596	0	0	0	0	0	0	0	4	0	D_0__Bacteria; D_1__Proteobacteria; D_2__Gammaproteobacteria; D_3__Betaproteobacteriales; D_4__Rhodocyclaceae; D_5__Dechloromonas; Ambiguous_taxa								MN			0	0	0	0	0	0	0	0.0140277	0
6770	0	0	0	0	0	0	0	4	0	D_0__Bacteria; D_1__Proteobacteria; D_2__Gammaproteobacteria; D_3__Betaproteobacteriales; D_4__Rhodocyclaceae								MN			0	0	0	0	0	0	0	0.0140277	0
7963	0	0	0	0	0	0	0	4	0	D_0__Bacteria; D_1__Bacteroidetes; D_2__Ignavibacteria; D_3__Ignavibacteriales								MN			0	0	0	0	0	0	0	0.0140277	0
9206	0	0	0	0	0	0	0	4	0	D_0__Archaea; D_1__Crenarchaeota; D_2__Bathyarchaeia; Ambiguous_taxa; Ambiguous_taxa; Ambiguous_taxa; Ambiguous_taxa								MN			0	0	0	0	0	0	0	0.0140277	0
10348	0	0	0	0	0	1	2	3	0	D_0__Bacteria; D_1__Proteobacteria; D_2__Gammaproteobacteria; D_3__Betaproteobacteriales; D_4__Rhodocyclaceae						MIX		MN			0	0	0	0	0	0.00350693	0.00701385	0.0105208	0
1746	0	0	0	0	0	0	2	3	0	D_0__Archaea; D_1__Euryarchaeota; D_2__Methanomicrobia; D_3__Methanosarcinales; D_4__Methanosaetaceae; D_5__Methanosaeta; Ambiguous_taxa								MN			0	0	0	0	0	0	0.00701385	0.0105208	0
2046	0	52	27	0	1	0	1	3	0	D_0__Bacteria; D_1__Proteobacteria; D_2__Gammaproteobacteria; D_3__Betaproteobacteriales; D_4__Rhodocyclaceae; D_5__Azospira		NT	FE		BIC			MN			0	0.18236	0.094687	0	0.00350693	0	0.00350693	0.0105208	0
1266	0	0	0	0	0	0	1	3	0	D_0__Bacteria; D_1__Bacteroidetes; D_2__Ignavibacteria; D_3__Kryptoniales; D_4__BSV26; Ambiguous_taxa; Ambiguous_taxa								MN			0	0	0	0	0	0	0.00350693	0.0105208	0
1646	0	0	0	0	0	0	1	3	0	D_0__Bacteria; D_1__Planctomycetes; D_2__Planctomycetacia; D_3__Pirellulales; D_4__Pirellulaceae								MN			0	0	0	0	0	0	0.00350693	0.0105208	0
6680	0	0	0	0	1	14	0	3	0	D_0__Bacteria; D_1__Proteobacteria; D_2__Gammaproteobacteria; D_3__Betaproteobacteriales; D_4__Rhodocyclaceae; D_5__Dechloromonas; Ambiguous_taxa					BIC	MIX		MN			0	0	0	0	0.00350693	0.049097	0	0.0105208	0
5220	0	0	0	0	0	1	0	3	0	D_0__Bacteria; D_1__Proteobacteria; D_2__Gammaproteobacteria; D_3__Betaproteobacteriales; D_4__Rhodocyclaceae						MIX		MN			0	0	0	0	0	0.00350693	0	0.0105208	0
7454	0	0	0	0	0	1	0	3	0	D_0__Bacteria; D_1__Proteobacteria; D_2__Gammaproteobacteria; D_3__Betaproteobacteriales; D_4__Rhodocyclaceae						MIX		MN			0	0	0	0	0	0.00350693	0	0.0105208	0
1557	0	0	0	0	0	0	0	3	0	D_0__Bacteria								MN			0	0	0	0	0	0	0	0.0105208	0
1843	0	0	0	0	0	0	0	3	0	D_0__Bacteria; D_1__Spirochaetes; D_2__Spirochaetia; D_3__Spirochaetales; D_4__Spirochaetaceae; D_5__uncultured; D_6__uncultured bacterium								MN			0	0	0	0	0	0	0	0.0105208	0
1958	0	0	0	0	0	0	0	3	0	D_0__Bacteria; D_1__Proteobacteria; D_2__Alphaproteobacteria; D_3__Sphingomonadales; D_4__Sphingomonadaceae								MN			0	0	0	0	0	0	0	0.0105208	0
2053	0	0	0	0	0	0	0	3	0	D_0__Bacteria								MN			0	0	0	0	0	0	0	0.0105208	0
2054	0	0	0	0	0	0	0	3	0	D_0__Bacteria; D_1__Spirochaetes; D_2__Spirochaetia; D_3__Spirochaetales; D_4__Spirochaetaceae; D_5__Spirochaeta 2; D_6__uncultured soil bacterium								MN			0	0	0	0	0	0	0	0.0105208	0
2221	0	0	0	0	0	0	0	3	0	D_0__Bacteria; D_1__Chloroflexi; D_2__Anaerolineae; D_3__Anaerolineales; D_4__Anaerolineaceae; D_5__Leptolinea								MN			0	0	0	0	0	0	0	0.0105208	0
2343	0	0	0	0	0	0	0	3	0	D_0__Bacteria; D_1__Chloroflexi; D_2__Anaerolineae; D_3__Anaerolineales; D_4__Anaerolineaceae; D_5__Levilinea; D_6__uncultured bacterium								MN			0	0	0	0	0	0	0	0.0105208	0
2344	0	0	0	0	0	0	0	3	0	D_0__Bacteria; D_1__Verrucomicrobia; D_2__Verrucomicrobiae; D_3__B29; D_4__uncultured bacterium; D_5__uncultured bacterium; D_6__uncultured bacterium								MN			0	0	0	0	0	0	0	0.0105208	0
2521	0	0	0	0	0	0	0	3	0	D_0__Bacteria								MN			0	0	0	0	0	0	0	0.0105208	0
2716	0	0	0	0	0	0	0	3	0	D_0__Bacteria; D_1__Bacteroidetes; D_2__Ignavibacteria								MN			0	0	0	0	0	0	0	0.0105208	0
3065	0	0	0	0	0	0	0	3	0	D_0__Bacteria; D_1__Gemmatimonadetes; D_2__MD2902-B12								MN			0	0	0	0	0	0	0	0.0105208	0
3203	0	0	0	0	0	0	0	3	0	D_0__Bacteria; D_1__Elusimicrobia; D_2__Elusimicrobia; D_3__Lineage IV								MN			0	0	0	0	0	0	0	0.0105208	0
3447	0	0	0	0	0	0	0	3	0	D_0__Bacteria; D_1__Spirochaetes; D_2__MVP-15; D_3__uncultured bacterium; D_4__uncultured bacterium; D_5__uncultured bacterium; D_6__uncultured bacterium								MN			0	0	0	0	0	0	0	0.0105208	0
3958	0	0	0	0	0	0	0	3	0	D_0__Bacteria; D_1__Proteobacteria; D_2__Deltaproteobacteria								MN			0	0	0	0	0	0	0	0.0105208	0
4022	0	0	0	0	0	0	0	3	0	D_0__Bacteria; D_1__Chloroflexi; D_2__Anaerolineae; D_3__Anaerolineales; D_4__Anaerolineaceae								MN			0	0	0	0	0	0	0	0.0105208	0
5431	0	0	0	0	0	0	0	3	0	D_0__Bacteria; D_1__Proteobacteria; D_2__Gammaproteobacteria; D_3__Betaproteobacteriales								MN			0	0	0	0	0	0	0	0.0105208	0
5779	0	0	0	0	0	0	0	3	0	D_0__Bacteria; D_1__Firmicutes; D_2__Negativicutes; D_3__Selenomonadales; D_4__Veillonellaceae; D_5__uncultured								MN			0	0	0	0	0	0	0	0.0105208	0
5793	0	0	0	0	0	0	0	3	0	D_0__Bacteria; D_1__Proteobacteria; D_2__Gammaproteobacteria; D_3__Betaproteobacteriales; D_4__Rhodocyclaceae								MN			0	0	0	0	0	0	0	0.0105208	0
9113	0	0	0	0	0	0	0	3	0	D_0__Bacteria; D_1__Chloroflexi; D_2__Anaerolineae; D_3__Anaerolineales; D_4__Anaerolineaceae								MN			0	0	0	0	0	0	0	0.0105208	0
9702	0	0	0	0	0	0	0	3	0	D_0__Bacteria; D_1__Bacteroidetes; D_2__Ignavibacteria; D_3__Ignavibacteriales								MN			0	0	0	0	0	0	0	0.0105208	0
10215	0	0	0	0	0	0	0	3	0	D_0__Bacteria; D_1__Patescibacteria; D_2__Gracilibacteria								MN			0	0	0	0	0	0	0	0.0105208	0
6466	0	0	0	0	0	0	9	2	0	D_0__Bacteria; D_1__Proteobacteria; D_2__Gammaproteobacteria; D_3__Betaproteobacteriales; D_4__Rhodocyclaceae								MN			0	0	0	0	0	0	0.0315623	0.00701385	0
10574	0	13	0	0	0	4	6	2	0	D_0__Bacteria; D_1__Proteobacteria; D_2__Gammaproteobacteria; D_3__Betaproteobacteriales; D_4__Rhodocyclaceae; D_5__Azospira		NT				MIX		MN			0	0.04559	0	0	0	0.0140277	0.0210416	0.00701385	0
2025	0	0	0	0	0	0	3	2	0	D_0__Bacteria; D_1__Nitrospirae; D_2__Thermodesulfovibrionia; D_3__uncultured								MN			0	0	0	0	0	0	0.0105208	0.00701385	0
8944	0	0	0	0	0	2	2	2	0	D_0__Bacteria; D_1__Proteobacteria; D_2__Gammaproteobacteria; D_3__Betaproteobacteriales; D_4__Rhodocyclaceae						MIX		MN			0	0	0	0	0	0.00701385	0.00701385	0.00701385	0
1631	0	0	0	0	17	0	1	2	0	D_0__Bacteria; D_1__Proteobacteria; D_2__Alphaproteobacteria; D_3__Caulobacterales; D_4__Caulobacteraceae; D_5__Phenylobacterium					BIC			MN			0	0	0	0	0.0596177	0	0.00350693	0.00701385	0
1860	0	0	0	0	0	0	1	2	0	D_0__Bacteria; D_1__Proteobacteria; D_2__Deltaproteobacteria; D_3__Syntrophobacterales; D_4__Syntrophaceae; D_5__Desulfomonile								MN			0	0	0	0	0	0	0.00350693	0.00701385	0
2580	0	0	0	0	0	13	0	2	0	D_0__Bacteria; D_1__Proteobacteria; D_2__Gammaproteobacteria; D_3__Betaproteobacteriales; D_4__Rhodocyclaceae						MIX		MN			0	0	0	0	0	0.04559	0	0.00701385	0
2405	0	0	0	0	0	1	0	2	0	D_0__Bacteria; D_1__Proteobacteria; D_2__Gammaproteobacteria; D_3__Betaproteobacteriales; D_4__Rhodocyclaceae						MIX		MN			0	0	0	0	0	0.00350693	0	0.00701385	0
3108	0	0	0	0	0	1	0	2	0	D_0__Bacteria; D_1__Proteobacteria; D_2__Gammaproteobacteria; D_3__Betaproteobacteriales; D_4__Rhodocyclaceae						MIX		MN			0	0	0	0	0	0.00350693	0	0.00701385	0
7009	0	0	0	0	0	1	0	2	0	D_0__Bacteria; D_1__Proteobacteria; D_2__Gammaproteobacteria; D_3__Betaproteobacteriales; D_4__Rhodocyclaceae						MIX		MN			0	0	0	0	0	0.00350693	0	0.00701385	0
3274	0	39	32	0	2	0	0	2	0	D_0__Bacteria; D_1__Proteobacteria; D_2__Gammaproteobacteria; D_3__Betaproteobacteriales; D_4__Rhodocyclaceae; D_5__Azospira		NT	FE		BIC			MN			0	0.13677	0.112222	0	0.00701385	0	0	0.00701385	0
10641	0	0	0	0	1	0	0	2	0	D_0__Bacteria; D_1__Firmicutes; D_2__Clostridia; D_3__Clostridiales; D_4__Clostridiaceae 1					BIC			MN			0	0	0	0	0.00350693	0	0	0.00701385	0
985	0	0	0	0	0	0	0	2	0	D_0__Bacteria; D_1__Firmicutes; D_2__Clostridia; D_3__Clostridiales; D_4__Eubacteriaceae; D_5__Acetobacterium								MN			0	0	0	0	0	0	0	0.00701385	0
1402	0	0	0	0	0	0	0	2	0	D_0__Bacteria; D_1__Firmicutes; D_2__Clostridia; D_3__Clostridiales; D_4__Peptostreptococcaceae; D_5__Sporacetigenium; Ambiguous_taxa								MN			0	0	0	0	0	0	0	0.00701385	0
1974	0	0	0	0	0	0	0	2	0	D_0__Archaea; D_1__Euryarchaeota; D_2__Thermoplasmata; D_3__Methanomassiliicoccales; D_4__Methanomassiliicoccaceae; D_5__uncultured; D_6__uncultured archaeon								MN			0	0	0	0	0	0	0	0.00701385	0
2052	0	0	0	0	0	0	0	2	0	D_0__Bacteria; D_1__Proteobacteria; D_2__Deltaproteobacteria; D_3__Desulfuromonadales; D_4__Geobacteraceae; D_5__Geobacter								MN			0	0	0	0	0	0	0	0.00701385	0
2117	0	0	0	0	0	0	0	2	0	D_0__Bacteria; D_1__Acidobacteria; D_2__Holophagae; D_3__Holophagales; D_4__Holophagaceae; Ambiguous_taxa; D_6__metagenome								MN			0	0	0	0	0	0	0	0.00701385	0
2225	0	0	0	0	0	0	0	2	0	D_0__Bacteria; D_1__Proteobacteria; D_2__Deltaproteobacteria								MN			0	0	0	0	0	0	0	0.00701385	0
2283	0	0	0	0	0	0	0	2	0	D_0__Bacteria; D_1__Proteobacteria; D_2__Deltaproteobacteria; D_3__Desulfuromonadales; D_4__Geobacteraceae; D_5__Geobacter; D_6__uncultured Desulfuromonadales bacterium								MN			0	0	0	0	0	0	0	0.00701385	0
2653	0	0	0	0	0	0	0	2	0	D_0__Bacteria								MN			0	0	0	0	0	0	0	0.00701385	0
2854	0	0	0	0	0	0	0	2	0	D_0__Archaea; D_1__Euryarchaeota; D_2__Methanobacteria; D_3__Methanobacteriales; D_4__Methanobacteriaceae; D_5__Methanobacterium								MN			0	0	0	0	0	0	0	0.00701385	0
3019	0	0	0	0	0	0	0	2	0	D_0__Bacteria; D_1__Proteobacteria; D_2__Alphaproteobacteria; D_3__Caulobacterales; D_4__Caulobacteraceae								MN			0	0	0	0	0	0	0	0.00701385	0
3029	0	0	0	0	0	0	0	2	0	D_0__Bacteria; D_1__Proteobacteria; D_2__Gammaproteobacteria; D_3__Betaproteobacteriales								MN			0	0	0	0	0	0	0	0.00701385	0
3356	0	0	0	0	0	0	0	2	0	D_0__Bacteria; D_1__Proteobacteria; D_2__Deltaproteobacteria; D_3__Syntrophobacterales; D_4__Syntrophaceae; D_5__Smithella								MN			0	0	0	0	0	0	0	0.00701385	0
3455	0	0	0	0	0	0	0	2	0	D_0__Bacteria; D_1__Firmicutes; D_2__Clostridia; D_3__Clostridiales; D_4__Syntrophomonadaceae; D_5__Syntrophomonas; D_6__uncultured bacterium								MN			0	0	0	0	0	0	0	0.00701385	0
4261	0	0	0	0	0	0	0	2	0	D_0__Bacteria; D_1__Proteobacteria; D_2__Gammaproteobacteria; D_3__Betaproteobacteriales; D_4__Rhodocyclaceae								MN			0	0	0	0	0	0	0	0.00701385	0
4930	0	0	0	0	0	0	0	2	0	D_0__Bacteria; D_1__Firmicutes; D_2__Clostridia; D_3__Clostridiales; D_4__Eubacteriaceae; D_5__Acetobacterium								MN			0	0	0	0	0	0	0	0.00701385	0
5167	0	0	0	0	0	0	0	2	0	D_0__Bacteria; D_1__Proteobacteria; D_2__Alphaproteobacteria; D_3__Caulobacterales; D_4__Caulobacteraceae; D_5__Phenylobacterium								MN			0	0	0	0	0	0	0	0.00701385	0
5181	0	0	0	0	0	0	0	2	0	D_0__Bacteria; D_1__Proteobacteria; D_2__Gammaproteobacteria; D_3__Betaproteobacteriales; D_4__Rhodocyclaceae								MN			0	0	0	0	0	0	0	0.00701385	0
5231	0	0	0	0	0	0	0	2	0	D_0__Bacteria; D_1__Firmicutes; D_2__Clostridia; D_3__Clostridiales; D_4__Clostridiaceae 1; D_5__Fonticella; D_6__uncultured bacterium								MN			0	0	0	0	0	0	0	0.00701385	0
5278	0	0	0	0	0	0	0	2	0	D_0__Bacteria; D_1__Proteobacteria; D_2__Gammaproteobacteria; D_3__Betaproteobacteriales								MN			0	0	0	0	0	0	0	0.00701385	0
5692	0	0	0	0	0	0	0	2	0	D_0__Bacteria; D_1__Proteobacteria; D_2__Gammaproteobacteria; D_3__Betaproteobacteriales; D_4__Rhodocyclaceae								MN			0	0	0	0	0	0	0	0.00701385	0
5928	0	0	0	0	0	0	0	2	0	D_0__Bacteria; D_1__Proteobacteria; D_2__Gammaproteobacteria; D_3__Betaproteobacteriales; D_4__Rhodocyclaceae								MN			0	0	0	0	0	0	0	0.00701385	0
6248	0	0	0	0	0	0	0	2	0	D_0__Bacteria; D_1__Proteobacteria								MN			0	0	0	0	0	0	0	0.00701385	0
7376	0	0	0	0	0	0	0	2	0	D_0__Bacteria; D_1__Spirochaetes; D_2__Spirochaetia; D_3__Spirochaetales; D_4__Spirochaetaceae; D_5__uncultured								MN			0	0	0	0	0	0	0	0.00701385	0
7514	0	0	0	0	0	0	0	2	0	D_0__Bacteria; D_1__Firmicutes; D_2__Clostridia; D_3__Clostridiales								MN			0	0	0	0	0	0	0	0.00701385	0
7669	0	0	0	0	0	0	0	2	0	D_0__Bacteria; D_1__Firmicutes; D_2__Clostridia; D_3__Clostridiales; D_4__Peptostreptococcaceae; D_5__Sporacetigenium; Ambiguous_taxa								MN			0	0	0	0	0	0	0	0.00701385	0
8542	0	0	0	0	0	0	0	2	0	D_0__Bacteria; D_1__Proteobacteria; D_2__Deltaproteobacteria; D_3__Syntrophobacterales; D_4__Syntrophaceae; D_5__uncultured								MN			0	0	0	0	0	0	0	0.00701385	0
9619	0	0	0	0	0	0	0	2	0	D_0__Bacteria; D_1__Firmicutes; D_2__Clostridia; D_3__Clostridiales; D_4__Clostridiaceae 1; D_5__Youngiibacter; Ambiguous_taxa								MN			0	0	0	0	0	0	0	0.00701385	0
1965	0	1	0	0	0	0	12	1	0	D_0__Bacteria; D_1__Proteobacteria; D_2__Gammaproteobacteria; D_3__Betaproteobacteriales; D_4__Rhodocyclaceae		NT						MN			0	0.00350693	0	0	0	0	0.0420831	0.00350693	0
56	0	0	0	0	0	1	10	1	0	D_0__Bacteria; D_1__Proteobacteria; D_2__Alphaproteobacteria; D_3__Caulobacterales; D_4__Caulobacteraceae; D_5__Brevundimonas						MIX		MN			0	0	0	0	0	0.00350693	0.0350693	0.00350693	0
4216	0	0	0	0	0	0	5	1	0	D_0__Bacteria; D_1__Proteobacteria; D_2__Alphaproteobacteria; D_3__Rhizobiales; D_4__Pleomorphomonadaceae; D_5__uncultured; Ambiguous_taxa								MN			0	0	0	0	0	0	0.0175346	0.00350693	0
3429	0	4	0	0	0	0	4	1	0	D_0__Bacteria; D_1__Proteobacteria; D_2__Gammaproteobacteria; D_3__Betaproteobacteriales; D_4__Rhodocyclaceae		NT						MN			0	0.0140277	0	0	0	0	0.0140277	0.00350693	0
969	0	0	0	0	0	0	3	1	0	D_0__Bacteria; D_1__Proteobacteria								MN			0	0	0	0	0	0	0.0105208	0.00350693	0
1060	0	0	0	0	0	0	2	1	0	D_0__Bacteria; D_1__Proteobacteria; D_2__Deltaproteobacteria; D_3__Syntrophobacterales; D_4__Syntrophaceae; D_5__Syntrophus; Ambiguous_taxa								MN			0	0	0	0	0	0	0.00701385	0.00350693	0
2235	0	0	0	0	0	0	2	1	0	D_0__Bacteria; D_1__Patescibacteria; D_2__Parcubacteria; D_3__Candidatus Nomurabacteria								MN			0	0	0	0	0	0	0.00701385	0.00350693	0
3309	0	0	0	0	0	0	2	1	0	D_0__Bacteria; D_1__Proteobacteria; D_2__Gammaproteobacteria; D_3__Betaproteobacteriales; D_4__Rhodocyclaceae								MN			0	0	0	0	0	0	0.00701385	0.00350693	0
1527	0	0	0	0	0	0	1	1	0	D_0__Bacteria; D_1__Bacteroidetes; D_2__Bacteroidia; D_3__Bacteroidales; D_4__Bacteroidetes vadinHA17; Ambiguous_taxa; Ambiguous_taxa								MN			0	0	0	0	0	0	0.00350693	0.00350693	0
2822	0	0	0	0	0	0	1	1	0	D_0__Bacteria; D_1__Chloroflexi; D_2__Anaerolineae; D_3__Anaerolineales; D_4__Anaerolineaceae								MN			0	0	0	0	0	0	0.00350693	0.00350693	0
5592	0	0	0	0	0	0	1	1	0	D_0__Bacteria; D_1__Rokubacteria; D_2__NC10; D_3__Methylomirabilales; D_4__Methylomirabilaceae; D_5__Sh765B-TzT-35; D_6__uncultured bacterium								MN			0	0	0	0	0	0	0.00350693	0.00350693	0
1014	0	6	0	0	0	3	0	1	0	D_0__Bacteria; D_1__Proteobacteria; D_2__Gammaproteobacteria; D_3__Betaproteobacteriales		NT				MIX		MN			0	0.0210416	0	0	0	0.0105208	0	0.00350693	0
3394	0	0	0	0	0	2	0	1	0	D_0__Bacteria; D_1__Proteobacteria; D_2__Gammaproteobacteria; D_3__Betaproteobacteriales; D_4__Rhodocyclaceae						MIX		MN			0	0	0	0	0	0.00701385	0	0.00350693	0
2947	0	0	0	0	3	1	0	1	0	D_0__Bacteria; D_1__Spirochaetes; D_2__Spirochaetia; D_3__Spirochaetales; D_4__Spirochaetaceae; D_5__uncultured					BIC	MIX		MN			0	0	0	0	0.0105208	0.00350693	0	0.00350693	0
6477	0	0	0	0	0	1	0	1	0	D_0__Bacteria; D_1__Proteobacteria; D_2__Gammaproteobacteria; D_3__Betaproteobacteriales; D_4__Rhodocyclaceae						MIX		MN			0	0	0	0	0	0.00350693	0	0.00350693	0
8580	0	0	0	0	0	1	0	1	0	D_0__Bacteria; D_1__Proteobacteria; D_2__Gammaproteobacteria; D_3__Betaproteobacteriales; D_4__Rhodocyclaceae						MIX		MN			0	0	0	0	0	0.00350693	0	0.00350693	0
4	0	0	0	0	21	0	0	1	0	D_0__Bacteria; D_1__Proteobacteria; D_2__Deltaproteobacteria; D_3__Desulfuromonadales; D_4__Geobacteraceae; D_5__Geobacter					BIC			MN			0	0	0	0	0.0736454	0	0	0.00350693	0
1290	0	0	0	0	5	0	0	1	0	D_0__Bacteria; D_1__Acidobacteria; D_2__Holophagae; D_3__Subgroup 7					BIC			MN			0	0	0	0	0.0175346	0	0	0.00350693	0
3999	0	0	0	0	2	0	0	1	0	D_0__Bacteria; D_1__Proteobacteria; D_2__Alphaproteobacteria; D_3__Caulobacterales; D_4__Caulobacteraceae; D_5__Phenylobacterium					BIC			MN			0	0	0	0	0.00701385	0	0	0.00350693	0
4743	0	0	0	0	2	0	0	1	0	D_0__Archaea; D_1__Euryarchaeota; D_2__Methanomicrobia; D_3__Methanomicrobiales; D_4__Methanoregulaceae; D_5__Methanoregula					BIC			MN			0	0	0	0	0.00701385	0	0	0.00350693	0
6159	0	0	0	0	2	0	0	1	0	D_0__Bacteria; D_1__Spirochaetes; D_2__Spirochaetia; D_3__Spirochaetales; D_4__Spirochaetaceae; D_5__uncultured; Ambiguous_taxa					BIC			MN			0	0	0	0	0.00701385	0	0	0.00350693	0
4379	0	90	20	0	1	0	0	1	0	D_0__Bacteria; D_1__Proteobacteria; D_2__Gammaproteobacteria; D_3__Betaproteobacteriales; D_4__Rhodocyclaceae; D_5__Azospira		NT	FE		BIC			MN			0	0.315623	0.0701385	0	0.00350693	0	0	0.00350693	0
67	0	73	18	0	1	0	0	1	0	D_0__Bacteria; D_1__Proteobacteria; D_2__Gammaproteobacteria; D_3__Betaproteobacteriales; D_4__Rhodocyclaceae; D_5__Azospira		NT	FE		BIC			MN			0	0.256006	0.0631247	0	0.00350693	0	0	0.00350693	0
10375	0	0	0	0	1	0	0	1	0	D_0__Bacteria; D_1__Acidobacteria; D_2__Holophagae; D_3__Subgroup 7					BIC			MN			0	0	0	0	0.00350693	0	0	0.00350693	0
16	0	3003	130	0	0	0	0	1	0	D_0__Bacteria; D_1__Chloroflexi; D_2__Anaerolineae; D_3__Anaerolineales; D_4__Anaerolineaceae; D_5__uncultured; D_6__uncultured prokaryote		NT	FE					MN			0	10.5313	0.4559	0	0	0	0	0.00350693	0
4385	0	18	7	0	0	0	0	1	0	D_0__Bacteria; D_1__Proteobacteria; D_2__Gammaproteobacteria; D_3__Betaproteobacteriales; D_4__Rhodocyclaceae; D_5__Azospira		NT	FE					MN			0	0.0631247	0.0245485	0	0	0	0	0.00350693	0
3085	0	27	6	0	0	0	0	1	0	D_0__Bacteria; D_1__Proteobacteria; D_2__Gammaproteobacteria; D_3__Betaproteobacteriales; D_4__Rhodocyclaceae; D_5__Azospira		NT	FE					MN			0	0.094687	0.0210416	0	0	0	0	0.00350693	0
5985	0	34	0	0	0	0	0	1	0	D_0__Bacteria; D_1__Proteobacteria; D_2__Gammaproteobacteria; D_3__Betaproteobacteriales		NT						MN			0	0.119235	0	0	0	0	0	0.00350693	0
10427	0	3	0	0	0	0	0	1	0	D_0__Bacteria; D_1__Proteobacteria; D_2__Gammaproteobacteria; D_3__Betaproteobacteriales; D_4__Rhodocyclaceae		NT						MN			0	0.0105208	0	0	0	0	0	0.00350693	0
2587	0	2	0	0	0	0	0	1	0	D_0__Bacteria; D_1__Bacteroidetes; D_2__Ignavibacteria; D_3__SJA-28; D_4__uncultured bacterium; D_5__uncultured bacterium; D_6__uncultured bacterium		NT						MN			0	0.00701385	0	0	0	0	0	0.00350693	0
3121	0	2	0	0	0	0	0	1	0	D_0__Bacteria; D_1__Bacteroidetes; D_2__Ignavibacteria; D_3__SJA-28		NT						MN			0	0.00701385	0	0	0	0	0	0.00350693	0
3144	0	1	0	0	0	0	0	1	0	D_0__Bacteria; D_1__Proteobacteria; D_2__Gammaproteobacteria; D_3__Betaproteobacteriales; D_4__Rhodocyclaceae; D_5__Azospira		NT						MN			0	0.00350693	0	0	0	0	0	0.00350693	0
8178	0	1	0	0	0	0	0	1	0	D_0__Bacteria; D_1__Bacteroidetes; D_2__Ignavibacteria; D_3__SJA-28		NT						MN			0	0.00350693	0	0	0	0	0	0.00350693	0
1700	0	0	0	0	0	0	0	1	0	D_0__Bacteria; D_1__Proteobacteria; D_2__Deltaproteobacteria; D_3__Myxococcales; D_4__Archangiaceae; D_5__Anaeromyxobacter; Ambiguous_taxa								MN			0	0	0	0	0	0	0	0.00350693	0
1800	0	0	0	0	0	0	0	1	0	D_0__Archaea; D_1__Nanoarchaeaeota; D_2__Nanohaloarchaeia; D_3__Aenigmarchaeales								MN			0	0	0	0	0	0	0	0.00350693	0
1852	0	0	0	0	0	0	0	1	0	D_0__Bacteria; D_1__Acidobacteria; D_2__Holophagae; D_3__Holophagales; D_4__Holophagaceae								MN			0	0	0	0	0	0	0	0.00350693	0
1963	0	0	0	0	0	0	0	1	0	D_0__Bacteria; D_1__Proteobacteria; D_2__Gammaproteobacteria; D_3__Betaproteobacteriales; D_4__Rhodocyclaceae; D_5__Dechloromonas								MN			0	0	0	0	0	0	0	0.00350693	0
2352	0	0	0	0	0	0	0	1	0	D_0__Bacteria; D_1__Spirochaetes; D_2__Spirochaetia; D_3__Spirochaetales; D_4__Spirochaetaceae; D_5__uncultured; Ambiguous_taxa								MN			0	0	0	0	0	0	0	0.00350693	0
2483	0	0	0	0	0	0	0	1	0	D_0__Bacteria; D_1__Spirochaetes; D_2__Spirochaetia; D_3__Spirochaetales; D_4__Spirochaetaceae; D_5__uncultured; Ambiguous_taxa								MN			0	0	0	0	0	0	0	0.00350693	0
2484	0	0	0	0	0	0	0	1	0	D_0__Bacteria; D_1__Firmicutes; D_2__Clostridia; D_3__Clostridiales; D_4__Eubacteriaceae; D_5__Acetobacterium								MN			0	0	0	0	0	0	0	0.00350693	0
2489	0	0	0	0	0	0	0	1	0	D_0__Bacteria; D_1__Proteobacteria; D_2__Gammaproteobacteria; D_3__Betaproteobacteriales; D_4__Rhodocyclaceae								MN			0	0	0	0	0	0	0	0.00350693	0
2571	0	0	0	0	0	0	0	1	0	D_0__Bacteria; D_1__Verrucomicrobia; D_2__Verrucomicrobiae								MN			0	0	0	0	0	0	0	0.00350693	0
2601	0	0	0	0	0	0	0	1	0	D_0__Bacteria; D_1__Acidobacteria; D_2__Holophagae; D_3__Subgroup 7								MN			0	0	0	0	0	0	0	0.00350693	0
2715	0	0	0	0	0	0	0	1	0	D_0__Bacteria; D_1__Spirochaetes; D_2__Spirochaetia; D_3__Spirochaetales; D_4__Spirochaetaceae; D_5__Treponema; D_6__uncultured Spirochaetaceae bacterium								MN			0	0	0	0	0	0	0	0.00350693	0
2948	0	0	0	0	0	0	0	1	0	D_0__Bacteria; D_1__Proteobacteria; D_2__Gammaproteobacteria; D_3__Betaproteobacteriales; D_4__Rhodocyclaceae								MN			0	0	0	0	0	0	0	0.00350693	0
3061	0	0	0	0	0	0	0	1	0	D_0__Bacteria; D_1__Actinobacteria; D_2__Coriobacteriia; D_3__OPB41								MN			0	0	0	0	0	0	0	0.00350693	0
3139	0	0	0	0	0	0	0	1	0	D_0__Bacteria; D_1__Proteobacteria; D_2__Gammaproteobacteria; D_3__Betaproteobacteriales; D_4__Rhodocyclaceae								MN			0	0	0	0	0	0	0	0.00350693	0
3167	0	0	0	0	0	0	0	1	0	D_0__Bacteria; D_1__Proteobacteria; D_2__Alphaproteobacteria; D_3__Rhizobiales; D_4__Pleomorphomonadaceae; D_5__uncultured; Ambiguous_taxa								MN			0	0	0	0	0	0	0	0.00350693	0
3233	0	0	0	0	0	0	0	1	0	D_0__Bacteria; D_1__Verrucomicrobia; D_2__Verrucomicrobiae; D_3__B29; D_4__uncultured bacterium; D_5__uncultured bacterium; D_6__uncultured bacterium								MN			0	0	0	0	0	0	0	0.00350693	0
3499	0	0	0	0	0	0	0	1	0	D_0__Bacteria; D_1__Bacteroidetes; D_2__Bacteroidia								MN			0	0	0	0	0	0	0	0.00350693	0
3544	0	0	0	0	0	0	0	1	0	D_0__Bacteria; D_1__Firmicutes; D_2__Clostridia; D_3__Clostridiales; D_4__Eubacteriaceae; D_5__Acetobacterium								MN			0	0	0	0	0	0	0	0.00350693	0
3587	0	0	0	0	0	0	0	1	0	D_0__Bacteria; D_1__Firmicutes; D_2__Negativicutes; D_3__Selenomonadales; D_4__Veillonellaceae; D_5__uncultured								MN			0	0	0	0	0	0	0	0.00350693	0
3675	0	0	0	0	0	0	0	1	0	D_0__Bacteria								MN			0	0	0	0	0	0	0	0.00350693	0
4059	0	0	0	0	0	0	0	1	0	D_0__Bacteria; D_1__Proteobacteria; D_2__Deltaproteobacteria; D_3__Desulfuromonadales; D_4__Geobacteraceae; D_5__Geobacter								MN			0	0	0	0	0	0	0	0.00350693	0
4301	0	0	0	0	0	0	0	1	0	D_0__Bacteria; D_1__Proteobacteria; D_2__Deltaproteobacteria; D_3__Syntrophobacterales; D_4__Syntrophaceae; D_5__uncultured								MN			0	0	0	0	0	0	0	0.00350693	0
4396	0	0	0	0	0	0	0	1	0	D_0__Bacteria; D_1__Proteobacteria; D_2__Deltaproteobacteria; D_3__Desulfuromonadales; D_4__Geobacteraceae; D_5__Geobacter								MN			0	0	0	0	0	0	0	0.00350693	0
4402	0	0	0	0	0	0	0	1	0	D_0__Bacteria; D_1__Proteobacteria; D_2__Deltaproteobacteria; D_3__Desulfuromonadales								MN			0	0	0	0	0	0	0	0.00350693	0
4405	0	0	0	0	0	0	0	1	0	D_0__Bacteria; D_1__Verrucomicrobia; D_2__Verrucomicrobiae								MN			0	0	0	0	0	0	0	0.00350693	0
4431	0	0	0	0	0	0	0	1	0	D_0__Bacteria; D_1__Proteobacteria; D_2__Gammaproteobacteria; D_3__Betaproteobacteriales; D_4__Rhodocyclaceae								MN			0	0	0	0	0	0	0	0.00350693	0
4665	0	0	0	0	0	0	0	1	0	D_0__Bacteria; D_1__Verrucomicrobia; D_2__Verrucomicrobiae; D_3__B29; D_4__uncultured bacterium; D_5__uncultured bacterium; D_6__uncultured bacterium								MN			0	0	0	0	0	0	0	0.00350693	0
4669	0	0	0	0	0	0	0	1	0	D_0__Bacteria; D_1__Verrucomicrobia; D_2__Verrucomicrobiae; D_3__Pedosphaerales; D_4__Pedosphaeraceae								MN			0	0	0	0	0	0	0	0.00350693	0
4998	0	0	0	0	0	0	0	1	0	D_0__Archaea								MN			0	0	0	0	0	0	0	0.00350693	0
5050	0	0	0	0	0	0	0	1	0	D_0__Archaea; D_1__Diapherotrites; D_2__Micrarchaeia								MN			0	0	0	0	0	0	0	0.00350693	0
5349	0	0	0	0	0	0	0	1	0	D_0__Bacteria; D_1__Bacteroidetes; D_2__Bacteroidia; D_3__Sphingobacteriales; D_4__Lentimicrobiaceae								MN			0	0	0	0	0	0	0	0.00350693	0
5561	0	0	0	0	0	0	0	1	0	D_0__Bacteria; D_1__Bacteroidetes; D_2__Bacteroidia; D_3__Cytophagales; D_4__Cyclobacteriaceae; D_5__Cecembia; Ambiguous_taxa								MN			0	0	0	0	0	0	0	0.00350693	0
5605	0	0	0	0	0	0	0	1	0	D_0__Bacteria; D_1__Acidobacteria; D_2__Acidobacteriia; D_3__Solibacterales; D_4__Solibacteraceae (Subgroup 3); D_5__Paludibaculum								MN			0	0	0	0	0	0	0	0.00350693	0
5941	0	0	0	0	0	0	0	1	0	D_0__Bacteria; D_1__Chloroflexi; D_2__Anaerolineae; D_3__Anaerolineales; D_4__Anaerolineaceae								MN			0	0	0	0	0	0	0	0.00350693	0
6108	0	0	0	0	0	0	0	1	0	D_0__Bacteria; D_1__Spirochaetes; D_2__Spirochaetia; D_3__Spirochaetales; D_4__Spirochaetaceae; D_5__uncultured; Ambiguous_taxa								MN			0	0	0	0	0	0	0	0.00350693	0
6821	0	0	0	0	0	0	0	1	0	D_0__Bacteria; D_1__Firmicutes; D_2__Negativicutes; D_3__Selenomonadales; D_4__Veillonellaceae; D_5__uncultured								MN			0	0	0	0	0	0	0	0.00350693	0
6962	0	0	0	0	0	0	0	1	0	D_0__Bacteria; D_1__Proteobacteria; D_2__Gammaproteobacteria; D_3__Betaproteobacteriales; D_4__Rhodocyclaceae								MN			0	0	0	0	0	0	0	0.00350693	0
7181	0	0	0	0	0	0	0	1	0	D_0__Bacteria; D_1__Firmicutes; D_2__Clostridia; D_3__Clostridiales; D_4__Eubacteriaceae; D_5__Acetobacterium								MN			0	0	0	0	0	0	0	0.00350693	0
7306	0	0	0	0	0	0	0	1	0	D_0__Archaea; D_1__Crenarchaeota; D_2__Bathyarchaeia; Ambiguous_taxa; Ambiguous_taxa; Ambiguous_taxa; Ambiguous_taxa								MN			0	0	0	0	0	0	0	0.00350693	0
7310	0	0	0	0	0	0	0	1	0	D_0__Bacteria; D_1__Chloroflexi; D_2__Anaerolineae; D_3__Anaerolineales; D_4__Anaerolineaceae								MN			0	0	0	0	0	0	0	0.00350693	0
7336	0	0	0	0	0	0	0	1	0	D_0__Bacteria; D_1__Firmicutes; D_2__Clostridia; D_3__Clostridiales; D_4__Peptostreptococcaceae; D_5__Sporacetigenium								MN			0	0	0	0	0	0	0	0.00350693	0
7406	0	0	0	0	0	0	0	1	0	D_0__Bacteria; D_1__Verrucomicrobia; D_2__Verrucomicrobiae; D_3__B29; D_4__uncultured bacterium; D_5__uncultured bacterium; D_6__uncultured bacterium								MN			0	0	0	0	0	0	0	0.00350693	0
7409	0	0	0	0	0	0	0	1	0	D_0__Bacteria; D_1__Proteobacteria; D_2__Gammaproteobacteria; D_3__Betaproteobacteriales; D_4__Rhodocyclaceae								MN			0	0	0	0	0	0	0	0.00350693	0
7463	0	0	0	0	0	0	0	1	0	D_0__Bacteria; D_1__Verrucomicrobia; D_2__Verrucomicrobiae; D_3__Pedosphaerales; D_4__Pedosphaeraceae								MN			0	0	0	0	0	0	0	0.00350693	0
7630	0	0	0	0	0	0	0	1	0	D_0__Bacteria; D_1__Firmicutes; D_2__Clostridia; D_3__Clostridiales								MN			0	0	0	0	0	0	0	0.00350693	0
7808	0	0	0	0	0	0	0	1	0	D_0__Bacteria; D_1__Bacteroidetes; D_2__Bacteroidia; D_3__Bacteroidales; D_4__Rikenellaceae; D_5__Blvii28 wastewater-sludge group								MN			0	0	0	0	0	0	0	0.00350693	0
7865	0	0	0	0	0	0	0	1	0	D_0__Archaea; D_1__Crenarchaeota; D_2__Bathyarchaeia								MN			0	0	0	0	0	0	0	0.00350693	0
7980	0	0	0	0	0	0	0	1	0	D_0__Bacteria; D_1__Spirochaetes; D_2__Spirochaetia; D_3__Spirochaetales; D_4__Spirochaetaceae; D_5__uncultured								MN			0	0	0	0	0	0	0	0.00350693	0
8030	0	0	0	0	0	0	0	1	0	D_0__Bacteria; D_1__Acidobacteria; D_2__Holophagae; D_3__Holophagales; D_4__Holophagaceae								MN			0	0	0	0	0	0	0	0.00350693	0
8123	0	0	0	0	0	0	0	1	0	D_0__Bacteria; D_1__Proteobacteria; D_2__Deltaproteobacteria; D_3__Desulfuromonadales; D_4__Geobacteraceae; D_5__Geobacter								MN			0	0	0	0	0	0	0	0.00350693	0
8322	0	0	0	0	0	0	0	1	0	D_0__Bacteria; D_1__Proteobacteria; D_2__Deltaproteobacteria; D_3__Desulfobacterales; D_4__Desulfobacteraceae; D_5__Sva0081 sediment group								MN			0	0	0	0	0	0	0	0.00350693	0
8633	0	0	0	0	0	0	0	1	0	D_0__Archaea; D_1__Diapherotrites; D_2__Micrarchaeia								MN			0	0	0	0	0	0	0	0.00350693	0
8698	0	0	0	0	0	0	0	1	0	D_0__Bacteria; D_1__Spirochaetes; D_2__Spirochaetia; D_3__Spirochaetales; D_4__Spirochaetaceae; D_5__uncultured; Ambiguous_taxa								MN			0	0	0	0	0	0	0	0.00350693	0
9178	0	0	0	0	0	0	0	1	0	D_0__Bacteria; D_1__Firmicutes; D_2__Clostridia; D_3__Clostridiales; D_4__Eubacteriaceae; D_5__Acetobacterium								MN			0	0	0	0	0	0	0	0.00350693	0
9283	0	0	0	0	0	0	0	1	0	D_0__Archaea; D_1__Diapherotrites; D_2__Micrarchaeia; D_3__uncultured archaeon; D_4__uncultured archaeon; D_5__uncultured archaeon; D_6__uncultured archaeon								MN			0	0	0	0	0	0	0	0.00350693	0
9299	0	0	0	0	0	0	0	1	0	D_0__Bacteria; D_1__Spirochaetes; D_2__Spirochaetia; D_3__Spirochaetales; D_4__Spirochaetaceae; D_5__uncultured								MN			0	0	0	0	0	0	0	0.00350693	0
9316	0	0	0	0	0	0	0	1	0	D_0__Bacteria; D_1__Bacteroidetes; D_2__Ignavibacteria; D_3__Ignavibacteriales								MN			0	0	0	0	0	0	0	0.00350693	0
9842	0	0	0	0	0	0	0	1	0	D_0__Bacteria; D_1__Firmicutes; D_2__Clostridia; D_3__Clostridiales; D_4__Family XIII								MN			0	0	0	0	0	0	0	0.00350693	0
9982	0	0	0	0	0	0	0	1	0	D_0__Bacteria; D_1__Proteobacteria; D_2__Gammaproteobacteria; D_3__Betaproteobacteriales; D_4__Rhodocyclaceae								MN			0	0	0	0	0	0	0	0.00350693	0
10135	0	0	0	0	0	0	0	1	0	D_0__Bacteria; D_1__Proteobacteria; D_2__Gammaproteobacteria; D_3__Betaproteobacteriales; D_4__Rhodocyclaceae								MN			0	0	0	0	0	0	0	0.00350693	0
10162	0	0	0	0	0	0	0	1	0	D_0__Bacteria; D_1__Firmicutes; D_2__Clostridia; D_3__Clostridiales; D_4__Eubacteriaceae; D_5__Acetobacterium								MN			0	0	0	0	0	0	0	0.00350693	0
10454	0	0	0	0	0	0	0	1	0	D_0__Bacteria; D_1__Proteobacteria; D_2__Deltaproteobacteria								MN			0	0	0	0	0	0	0	0.00350693	0
10457	0	0	0	0	0	0	0	1	0	D_0__Bacteria; D_1__Proteobacteria; D_2__Gammaproteobacteria; D_3__Betaproteobacteriales								MN			0	0	0	0	0	0	0	0.00350693	0
10614	0	0	0	0	0	0	0	1	0	D_0__Bacteria; D_1__Firmicutes; D_2__Clostridia; D_3__Clostridiales; D_4__Peptostreptococcaceae; D_5__Sporacetigenium								MN			0	0	0	0	0	0	0	0.00350693	0
10682	0	0	0	0	0	0	0	1	0	D_0__Bacteria; D_1__Verrucomicrobia; D_2__Verrucomicrobiae; D_3__Pedosphaerales; D_4__Pedosphaeraceae								MN			0	0	0	0	0	0	0	0.00350693	0
8146	0	0	0	0	0	0	1287	0	0	D_0__Bacteria; D_1__Nitrospirae; D_2__BMS9AB35											0	0	0	0	0	0	4.51341	0	0
2345	0	0	0	0	0	0	984	0	0	D_0__Bacteria; D_1__Deinococcus-Thermus; D_2__Deinococci; D_3__Deinococcales; D_4__Deinococcaceae; D_5__Deinococcus											0	0	0	0	0	0	3.45082	0	0
42	0	0	0	0	0	0	742	0	0	D_0__Bacteria; D_1__Proteobacteria; D_2__Gammaproteobacteria											0	0	0	0	0	0	2.60214	0	0
2181	0	0	0	0	0	0	599	0	0	D_0__Bacteria; D_1__Deinococcus-Thermus; D_2__Deinococci; D_3__Deinococcales; D_4__Deinococcaceae; D_5__Deinococcus											0	0	0	0	0	0	2.10065	0	0
3787	0	0	0	0	0	0	498	0	0	D_0__Bacteria; D_1__Proteobacteria; D_2__Gammaproteobacteria											0	0	0	0	0	0	1.74645	0	0
59	0	0	0	0	0	0	463	0	0	D_0__Bacteria; D_1__Proteobacteria; D_2__Deltaproteobacteria; D_3__Myxococcales											0	0	0	0	0	0	1.62371	0	0
65	0	0	0	0	0	0	317	0	0	D_0__Bacteria; D_1__Actinobacteria; D_2__Actinobacteria; D_3__Propionibacteriales; D_4__Nocardioidaceae; D_5__Nocardioides											0	0	0	0	0	0	1.1117	0	0
10508	0	0	0	0	0	0	312	0	0	D_0__Bacteria; D_1__Proteobacteria; D_2__Gammaproteobacteria; D_3__Betaproteobacteriales; D_4__Gallionellaceae; D_5__Sideroxydans											0	0	0	0	0	0	1.09416	0	0
863	0	0	0	0	0	0	301	0	0	D_0__Bacteria; D_1__Proteobacteria; D_2__Gammaproteobacteria; D_3__Betaproteobacteriales; D_4__Gallionellaceae											0	0	0	0	0	0	1.05558	0	0
73	0	0	0	0	0	0	255	0	0	D_0__Bacteria; D_1__Proteobacteria; D_2__Gammaproteobacteria											0	0	0	0	0	0	0.894266	0	0
38	0	0	0	0	0	0	186	0	0	D_0__Bacteria; D_1__Deinococcus-Thermus; D_2__Deinococci; D_3__Deinococcales; D_4__Deinococcaceae; D_5__Deinococcus; D_6__Deinococcus grandis											0	0	0	0	0	0	0.652288	0	0
409	0	0	0	0	0	0	185	0	0	D_0__Bacteria; D_1__Proteobacteria; D_2__Gammaproteobacteria; D_3__Betaproteobacteriales; D_4__Gallionellaceae; D_5__Sideroxydans											0	0	0	0	0	0	0.648781	0	0
8318	0	0	0	0	0	0	180	0	0	D_0__Bacteria; D_1__Proteobacteria; D_2__Gammaproteobacteria											0	0	0	0	0	0	0.631247	0	0
10267	0	0	0	0	0	0	156	0	0	D_0__Bacteria; D_1__Actinobacteria; D_2__Actinobacteria; D_3__Micrococcales; D_4__Intrasporangiaceae											0	0	0	0	0	0	0.54708	0	0
9390	0	0	0	0	0	0	149	0	0	D_0__Bacteria; D_1__Proteobacteria; D_2__Gammaproteobacteria; D_3__Betaproteobacteriales; D_4__Gallionellaceae											0	0	0	0	0	0	0.522532	0	0
104	0	0	0	0	0	0	129	0	0	D_0__Bacteria; D_1__Chloroflexi; D_2__Anaerolineae; D_3__RBG-13-54-9; D_4__uncultured prokaryote; D_5__uncultured prokaryote; D_6__uncultured prokaryote											0	0	0	0	0	0	0.452393	0	0
4663	0	0	0	0	0	0	125	0	0	D_0__Bacteria; D_1__Nitrospirae; D_2__BMS9AB35											0	0	0	0	0	0	0.438366	0	0
4505	0	0	0	0	0	0	119	0	0	D_0__Bacteria; D_1__Proteobacteria; D_2__Gammaproteobacteria; D_3__Pseudomonadales; D_4__Moraxellaceae; D_5__Acinetobacter											0	0	0	0	0	0	0.417324	0	0
5218	0	0	0	0	0	0	115	0	0	D_0__Bacteria; D_1__Proteobacteria; D_2__Gammaproteobacteria											0	0	0	0	0	0	0.403297	0	0
121	0	0	0	0	0	0	108	0	0	D_0__Bacteria; D_1__Bacteroidetes; D_2__Ignavibacteria; D_3__Kryptoniales; D_4__BSV26											0	0	0	0	0	0	0.378748	0	0
124	0	0	0	0	0	0	102	0	0	D_0__Bacteria; D_1__Actinobacteria											0	0	0	0	0	0	0.357706	0	0
4615	0	0	0	0	0	0	102	0	0	D_0__Bacteria; D_1__Proteobacteria; D_2__Gammaproteobacteria; D_3__Betaproteobacteriales											0	0	0	0	0	0	0.357706	0	0
102	0	0	0	0	0	0	101	0	0	D_0__Bacteria; D_1__Actinobacteria; D_2__Actinobacteria; D_3__Micrococcales; D_4__Intrasporangiaceae; D_5__Ornithinimicrobium											0	0	0	0	0	0	0.3542	0	0
7328	0	0	0	0	0	0	100	0	0	D_0__Bacteria; D_1__Proteobacteria; D_2__Gammaproteobacteria; D_3__Betaproteobacteriales; D_4__Gallionellaceae											0	0	0	0	0	0	0.350693	0	0
5961	0	0	0	0	0	0	96	0	0	D_0__Bacteria; D_1__Actinobacteria; D_2__Actinobacteria; D_3__Propionibacteriales; D_4__Nocardioidaceae; D_5__Nocardioides											0	0	0	0	0	0	0.336665	0	0
9585	0	0	0	0	0	0	96	0	0	D_0__Bacteria; D_1__Proteobacteria; D_2__Gammaproteobacteria; D_3__Betaproteobacteriales; D_4__Gallionellaceae											0	0	0	0	0	0	0.336665	0	0
9007	0	0	0	0	0	0	92	0	0	D_0__Bacteria; D_1__Proteobacteria; D_2__Gammaproteobacteria; D_3__Pseudomonadales; D_4__Moraxellaceae; D_5__Acinetobacter											0	0	0	0	0	0	0.322637	0	0
171	0	0	0	0	0	0	88	0	0	D_0__Bacteria; D_1__Proteobacteria; D_2__Alphaproteobacteria; D_3__Rhizobiales											0	0	0	0	0	0	0.30861	0	0
2088	0	0	0	0	0	0	86	0	0	D_0__Bacteria; D_1__Nitrospirae; D_2__BMS9AB35											0	0	0	0	0	0	0.301596	0	0
3677	0	0	0	0	0	0	86	0	0	D_0__Bacteria; D_1__Proteobacteria; D_2__Gammaproteobacteria; D_3__Betaproteobacteriales; D_4__Gallionellaceae											0	0	0	0	0	0	0.301596	0	0
10017	0	0	0	0	0	0	86	0	0	D_0__Bacteria; D_1__Proteobacteria; D_2__Gammaproteobacteria; D_3__Betaproteobacteriales; D_4__Gallionellaceae											0	0	0	0	0	0	0.301596	0	0
210	0	0	0	0	0	0	85	0	0	D_0__Bacteria; D_1__Proteobacteria; D_2__Gammaproteobacteria; D_3__Betaproteobacteriales; D_4__Rhodocyclaceae											0	0	0	0	0	0	0.298089	0	0
107	0	0	0	0	0	0	84	0	0	D_0__Bacteria; D_1__Chloroflexi											0	0	0	0	0	0	0.294582	0	0
138	0	0	0	0	0	0	84	0	0	D_0__Archaea; D_1__Euryarchaeota; D_2__Methanomicrobia; D_3__Methanosarcinales; D_4__Methanoperedenaceae; D_5__Candidatus Methanoperedens; D_6__uncultured archaeon											0	0	0	0	0	0	0.294582	0	0
9236	0	0	0	0	0	0	83	0	0	D_0__Bacteria; D_1__Proteobacteria; D_2__Gammaproteobacteria; D_3__Pseudomonadales; D_4__Moraxellaceae; D_5__Acinetobacter											0	0	0	0	0	0	0.291075	0	0
112	0	0	0	0	0	0	80	0	0	D_0__Bacteria; D_1__Proteobacteria; D_2__Alphaproteobacteria; D_3__Rhizobiales; D_4__Beijerinckiaceae											0	0	0	0	0	0	0.280554	0	0
150	0	0	0	0	0	0	79	0	0	D_0__Bacteria; D_1__Chloroflexi; D_2__JG30-KF-CM66; Ambiguous_taxa; Ambiguous_taxa; Ambiguous_taxa; Ambiguous_taxa											0	0	0	0	0	0	0.277047	0	0
1834	0	0	0	0	0	0	71	0	0	D_0__Bacteria; D_1__Proteobacteria; D_2__Gammaproteobacteria											0	0	0	0	0	0	0.248992	0	0
1012	0	0	0	0	0	0	70	0	0	D_0__Bacteria; D_1__Proteobacteria; D_2__Gammaproteobacteria											0	0	0	0	0	0	0.245485	0	0
9887	0	0	0	0	0	0	69	0	0	D_0__Bacteria; D_1__Proteobacteria; D_2__Gammaproteobacteria; D_3__Betaproteobacteriales; D_4__Gallionellaceae											0	0	0	0	0	0	0.241978	0	0
6532	0	0	0	0	0	0	68	0	0	D_0__Bacteria; D_1__Actinobacteria; D_2__Actinobacteria; D_3__Propionibacteriales; D_4__Nocardioidaceae; D_5__Nocardioides											0	0	0	0	0	0	0.238471	0	0
263	0	0	0	0	0	10	65	0	0	D_0__Bacteria; D_1__Proteobacteria; D_2__Alphaproteobacteria; D_3__Caulobacterales; D_4__Caulobacteraceae; D_5__Brevundimonas						MIX					0	0	0	0	0	0.0350693	0.22795	0	0
50	0	2	0	0	0	0	65	0	0	D_0__Bacteria; D_1__Proteobacteria; D_2__Gammaproteobacteria; D_3__Betaproteobacteriales		NT									0	0.00701385	0	0	0	0	0.22795	0	0
144	0	0	0	0	0	0	64	0	0	D_0__Archaea; D_1__Euryarchaeota; D_2__Thermoplasmata; D_3__uncultured; D_4__uncultured archaeon; D_5__uncultured archaeon; D_6__uncultured archaeon											0	0	0	0	0	0	0.224443	0	0
1018	0	0	0	0	0	0	64	0	0	D_0__Bacteria; D_1__Proteobacteria; D_2__Gammaproteobacteria; D_3__Pseudomonadales; D_4__Moraxellaceae; D_5__Alkanindiges; Ambiguous_taxa											0	0	0	0	0	0	0.224443	0	0
689	0	0	0	0	0	0	63	0	0	D_0__Bacteria; D_1__Nitrospirae; D_2__BMS9AB35											0	0	0	0	0	0	0.220936	0	0
9539	0	0	0	0	0	0	63	0	0	D_0__Bacteria; D_1__Proteobacteria; D_2__Gammaproteobacteria; D_3__Pseudomonadales; D_4__Moraxellaceae											0	0	0	0	0	0	0.220936	0	0
8399	0	0	0	0	0	0	62	0	0	D_0__Bacteria; D_1__Actinobacteria; D_2__Actinobacteria; D_3__Micrococcales; D_4__Dermacoccaceae											0	0	0	0	0	0	0.217429	0	0
158	0	0	0	0	0	0	60	0	0	D_0__Bacteria; D_1__Proteobacteria; D_2__Deltaproteobacteria; D_3__Sva0485											0	0	0	0	0	0	0.210416	0	0
6387	0	0	0	0	0	0	60	0	0	D_0__Bacteria; D_1__Omnitrophicaeota											0	0	0	0	0	0	0.210416	0	0
10402	0	0	0	0	0	0	60	0	0	D_0__Bacteria; D_1__Proteobacteria; D_2__Gammaproteobacteria; D_3__Betaproteobacteriales; D_4__Gallionellaceae											0	0	0	0	0	0	0.210416	0	0
9404	0	0	0	0	0	0	59	0	0	D_0__Bacteria; D_1__Proteobacteria; D_2__Gammaproteobacteria; D_3__Betaproteobacteriales; D_4__Gallionellaceae; D_5__Sideroxydans											0	0	0	0	0	0	0.206909	0	0
179	0	0	0	0	0	0	58	0	0	D_0__Bacteria; D_1__Proteobacteria; D_2__Alphaproteobacteria; D_3__Rhizobiales; D_4__Beijerinckiaceae											0	0	0	0	0	0	0.203402	0	0
3979	0	0	0	0	0	0	56	0	0	D_0__Bacteria; D_1__Actinobacteria; D_2__Actinobacteria; D_3__Propionibacteriales; D_4__Nocardioidaceae; D_5__Nocardioides; D_6__uncultured Nocardioides sp.											0	0	0	0	0	0	0.196388	0	0
4698	0	0	0	0	0	0	56	0	0	D_0__Bacteria; D_1__Actinobacteria; D_2__Actinobacteria; D_3__Propionibacteriales; D_4__Nocardioidaceae; D_5__Nocardioides; D_6__uncultured Nocardioides sp.											0	0	0	0	0	0	0.196388	0	0
7259	0	0	0	0	0	0	56	0	0	D_0__Bacteria; D_1__Proteobacteria; D_2__Gammaproteobacteria; D_3__Pseudomonadales; D_4__Moraxellaceae; D_5__Acinetobacter											0	0	0	0	0	0	0.196388	0	0
6353	0	8	0	0	0	0	55	0	0	D_0__Bacteria; D_1__Proteobacteria; D_2__Gammaproteobacteria; D_3__Betaproteobacteriales		NT									0	0.0280554	0	0	0	0	0.192881	0	0
474	0	0	0	0	0	0	55	0	0	D_0__Bacteria; D_1__Proteobacteria; D_2__Alphaproteobacteria; D_3__Rhodobacterales; D_4__Rhodobacteraceae											0	0	0	0	0	0	0.192881	0	0
577	0	0	0	0	0	0	55	0	0	D_0__Bacteria; D_1__Actinobacteria; D_2__Actinobacteria; D_3__Micrococcales; D_4__Intrasporangiaceae; D_5__Tetrasphaera											0	0	0	0	0	0	0.192881	0	0
9692	0	0	0	0	0	0	55	0	0	D_0__Bacteria; D_1__Proteobacteria; D_2__Gammaproteobacteria; D_3__Betaproteobacteriales; D_4__Gallionellaceae											0	0	0	0	0	0	0.192881	0	0
5283	0	0	0	0	0	0	54	0	0	D_0__Bacteria; D_1__Proteobacteria; D_2__Gammaproteobacteria; D_3__Betaproteobacteriales; D_4__Gallionellaceae											0	0	0	0	0	0	0.189374	0	0
176	0	0	0	0	0	0	53	0	0	D_0__Bacteria; D_1__Proteobacteria; D_2__Deltaproteobacteria; D_3__Myxococcales; D_4__Sandaracinaceae; D_5__uncultured											0	0	0	0	0	0	0.185867	0	0
8990	0	0	0	0	0	0	53	0	0	D_0__Bacteria; D_1__Proteobacteria; D_2__Alphaproteobacteria; D_3__Caulobacterales; D_4__Caulobacteraceae; D_5__Brevundimonas											0	0	0	0	0	0	0.185867	0	0
9864	0	0	0	0	0	0	52	0	0	D_0__Bacteria; D_1__Proteobacteria; D_2__Gammaproteobacteria; D_3__Pseudomonadales; D_4__Moraxellaceae; D_5__Alkanindiges; Ambiguous_taxa											0	0	0	0	0	0	0.18236	0	0
10570	0	10260	894	0	0	0	51	0	0	D_0__Bacteria; D_1__Proteobacteria; D_2__Gammaproteobacteria; D_3__Betaproteobacteriales; D_4__Rhodocyclaceae; D_5__Denitratisoma; Ambiguous_taxa		NT	FE								0	35.9811	3.13519	0	0	0	0.178853	0	0
3819	0	0	0	0	0	0	51	0	0	D_0__Bacteria; D_1__Proteobacteria; D_2__Gammaproteobacteria; D_3__Pseudomonadales; D_4__Moraxellaceae; D_5__Alkanindiges; Ambiguous_taxa											0	0	0	0	0	0	0.178853	0	0
6391	0	0	0	0	0	0	49	0	0	D_0__Bacteria; D_1__Proteobacteria; D_2__Gammaproteobacteria; D_3__Pseudomonadales; D_4__Moraxellaceae; D_5__Alkanindiges; Ambiguous_taxa											0	0	0	0	0	0	0.171839	0	0
2865	0	0	0	0	0	1	48	0	0	D_0__Bacteria; D_1__Proteobacteria; D_2__Alphaproteobacteria; D_3__Caulobacterales; D_4__Caulobacteraceae; D_5__Brevundimonas						MIX					0	0	0	0	0	0.00350693	0.168332	0	0
6614	0	0	1	0	0	0	48	0	0	D_0__Bacteria; D_1__Proteobacteria; D_2__Gammaproteobacteria; D_3__Pseudomonadales; D_4__Moraxellaceae; D_5__Acinetobacter			FE								0	0	0.00350693	0	0	0	0.168332	0	0
713	0	0	0	0	0	0	48	0	0	D_0__Bacteria; D_1__Proteobacteria; D_2__Gammaproteobacteria; D_3__Pseudomonadales; D_4__Moraxellaceae; D_5__Acinetobacter											0	0	0	0	0	0	0.168332	0	0
1434	0	0	0	0	0	0	48	0	0	D_0__Bacteria; D_1__Proteobacteria; D_2__Gammaproteobacteria											0	0	0	0	0	0	0.168332	0	0
4785	0	0	0	0	0	0	48	0	0	D_0__Bacteria; D_1__Actinobacteria; D_2__Actinobacteria; D_3__Micrococcales; D_4__Intrasporangiaceae											0	0	0	0	0	0	0.168332	0	0
379	0	0	0	0	0	0	47	0	0	D_0__Bacteria; D_1__Proteobacteria; D_2__Gammaproteobacteria											0	0	0	0	0	0	0.164826	0	0
3864	0	0	0	0	0	0	47	0	0	D_0__Bacteria; D_1__Proteobacteria; D_2__Gammaproteobacteria; D_3__Pseudomonadales; D_4__Moraxellaceae; D_5__Alkanindiges											0	0	0	0	0	0	0.164826	0	0
5141	0	0	0	0	0	0	47	0	0	D_0__Bacteria; D_1__Proteobacteria; D_2__Gammaproteobacteria; D_3__Pseudomonadales; D_4__Moraxellaceae; D_5__Acinetobacter											0	0	0	0	0	0	0.164826	0	0
5567	0	0	0	0	0	0	47	0	0	D_0__Bacteria; D_1__Proteobacteria; D_2__Gammaproteobacteria; D_3__Betaproteobacteriales; D_4__Gallionellaceae; D_5__Sideroxydans; Ambiguous_taxa											0	0	0	0	0	0	0.164826	0	0
7169	0	0	0	0	0	0	46	0	0	D_0__Bacteria; D_1__Proteobacteria; D_2__Gammaproteobacteria; D_3__Pseudomonadales; D_4__Moraxellaceae; D_5__Acinetobacter											0	0	0	0	0	0	0.161319	0	0
5376	0	0	0	0	0	0	45	0	0	D_0__Bacteria; D_1__Proteobacteria; D_2__Gammaproteobacteria; D_3__Pseudomonadales; D_4__Moraxellaceae; D_5__Alkanindiges; Ambiguous_taxa											0	0	0	0	0	0	0.157812	0	0
8447	0	0	0	0	0	0	44	0	0	D_0__Bacteria; D_1__Proteobacteria; D_2__Gammaproteobacteria; D_3__Betaproteobacteriales; D_4__Rhodocyclaceae											0	0	0	0	0	0	0.154305	0	0
10282	0	0	0	0	0	0	44	0	0	D_0__Bacteria; D_1__Proteobacteria; D_2__Gammaproteobacteria; D_3__Betaproteobacteriales; D_4__Gallionellaceae											0	0	0	0	0	0	0.154305	0	0
232	0	0	0	0	0	0	43	0	0	D_0__Bacteria; D_1__Bacteroidetes; D_2__Bacteroidia; D_3__Cytophagales; D_4__Microscillaceae; D_5__Siphonobacter; D_6__uncultured bacterium											0	0	0	0	0	0	0.150798	0	0
6204	0	0	0	0	0	0	43	0	0	D_0__Bacteria; D_1__Proteobacteria; D_2__Gammaproteobacteria; D_3__Pseudomonadales; D_4__Moraxellaceae; D_5__Acinetobacter											0	0	0	0	0	0	0.150798	0	0
1541	0	0	0	0	0	0	42	0	0	D_0__Bacteria; D_1__Actinobacteria; D_2__Actinobacteria; D_3__Micrococcales; D_4__Dermacoccaceae											0	0	0	0	0	0	0.147291	0	0
10315	0	0	0	0	0	0	40	0	0	D_0__Bacteria; D_1__Proteobacteria; D_2__Gammaproteobacteria; D_3__Betaproteobacteriales; D_4__Gallionellaceae											0	0	0	0	0	0	0.140277	0	0
10316	0	0	0	0	0	0	40	0	0	D_0__Bacteria; D_1__Actinobacteria; D_2__Actinobacteria; D_3__Micrococcales; D_4__Intrasporangiaceae											0	0	0	0	0	0	0.140277	0	0
9501	0	108	77	0	0	1	39	0	0	D_0__Bacteria; D_1__Proteobacteria; D_2__Gammaproteobacteria; D_3__Betaproteobacteriales; D_4__Burkholderiaceae		NT	FE			MIX					0	0.378748	0.270033	0	0	0.00350693	0.13677	0	0
188	0	0	0	0	0	0	39	0	0	D_0__Bacteria; D_1__Omnitrophicaeota											0	0	0	0	0	0	0.13677	0	0
287	0	0	0	0	0	0	39	0	0	D_0__Bacteria; D_1__Chloroflexi; D_2__Dehalococcoidia; D_3__S085; D_4__uncultured bacterium; D_5__uncultured bacterium; D_6__uncultured bacterium											0	0	0	0	0	0	0.13677	0	0
829	0	0	0	0	0	0	39	0	0	D_0__Bacteria; D_1__Proteobacteria; D_2__Gammaproteobacteria											0	0	0	0	0	0	0.13677	0	0
2872	0	0	0	0	0	0	39	0	0	D_0__Bacteria; D_1__Proteobacteria; D_2__Gammaproteobacteria; D_3__Betaproteobacteriales											0	0	0	0	0	0	0.13677	0	0
10460	0	0	0	0	0	0	39	0	0	D_0__Bacteria; D_1__Proteobacteria; D_2__Gammaproteobacteria; D_3__Betaproteobacteriales; D_4__Gallionellaceae; D_5__Sideroxydans											0	0	0	0	0	0	0.13677	0	0
3081	0	0	0	0	0	0	38	0	0	D_0__Bacteria; D_1__Deinococcus-Thermus; D_2__Deinococci; D_3__Deinococcales; D_4__Deinococcaceae; D_5__Deinococcus											0	0	0	0	0	0	0.133263	0	0
311	0	0	0	0	0	0	37	0	0	D_0__Bacteria; D_1__Proteobacteria; D_2__Gammaproteobacteria; D_3__Betaproteobacteriales; D_4__Gallionellaceae; D_5__Sideroxydans											0	0	0	0	0	0	0.129756	0	0
177	0	0	0	0	0	0	36	0	0	D_0__Bacteria; D_1__Actinobacteria; D_2__Actinobacteria; D_3__Propionibacteriales; D_4__Nocardioidaceae; D_5__Nocardioides											0	0	0	0	0	0	0.126249	0	0
8964	0	0	0	0	0	0	36	0	0	D_0__Bacteria; D_1__Proteobacteria; D_2__Gammaproteobacteria; D_3__Pseudomonadales; D_4__Moraxellaceae; D_5__Acinetobacter											0	0	0	0	0	0	0.126249	0	0
9599	0	0	0	0	0	0	36	0	0	D_0__Bacteria; D_1__Proteobacteria; D_2__Gammaproteobacteria; D_3__Betaproteobacteriales; D_4__Gallionellaceae											0	0	0	0	0	0	0.126249	0	0
10185	0	0	0	0	0	0	36	0	0	D_0__Bacteria; D_1__Deinococcus-Thermus; D_2__Deinococci; D_3__Deinococcales; D_4__Deinococcaceae; D_5__Deinococcus											0	0	0	0	0	0	0.126249	0	0
345	0	0	0	0	0	0	35	0	0	D_0__Bacteria; D_1__Actinobacteria											0	0	0	0	0	0	0.122742	0	0
4949	0	0	0	0	0	0	35	0	0	D_0__Bacteria; D_1__Proteobacteria; D_2__Gammaproteobacteria; D_3__Pseudomonadales; D_4__Moraxellaceae; D_5__Alkanindiges; Ambiguous_taxa											0	0	0	0	0	0	0.122742	0	0
211	0	0	0	0	0	0	34	0	0	D_0__Bacteria; D_1__Proteobacteria; D_2__Alphaproteobacteria; D_3__Sphingomonadales; D_4__Sphingomonadaceae; D_5__Qipengyuania											0	0	0	0	0	0	0.119235	0	0
271	0	0	0	0	0	0	34	0	0	D_0__Bacteria; D_1__Proteobacteria; D_2__Gammaproteobacteria; D_3__Methylococcales; D_4__Methylococcaceae											0	0	0	0	0	0	0.119235	0	0
5921	0	0	0	0	0	0	34	0	0	D_0__Bacteria; D_1__Proteobacteria; D_2__Gammaproteobacteria; D_3__Pseudomonadales; D_4__Moraxellaceae											0	0	0	0	0	0	0.119235	0	0
10351	0	0	0	0	0	0	34	0	0	D_0__Bacteria; D_1__Proteobacteria; D_2__Gammaproteobacteria; D_3__Betaproteobacteriales; D_4__Gallionellaceae											0	0	0	0	0	0	0.119235	0	0
9938	0	0	0	0	0	1	33	0	0	D_0__Bacteria; D_1__Proteobacteria; D_2__Alphaproteobacteria; D_3__Caulobacterales; D_4__Caulobacteraceae; D_5__Brevundimonas						MIX					0	0	0	0	0	0.00350693	0.115729	0	0
252	0	0	0	0	0	0	33	0	0	D_0__Bacteria; D_1__Actinobacteria; D_2__Actinobacteria; D_3__Micrococcales; D_4__Intrasporangiaceae											0	0	0	0	0	0	0.115729	0	0
2114	0	0	0	0	0	0	33	0	0	D_0__Bacteria; D_1__Elusimicrobia; D_2__Elusimicrobia; D_3__Lineage IV; Ambiguous_taxa; Ambiguous_taxa; Ambiguous_taxa											0	0	0	0	0	0	0.115729	0	0
2905	0	0	0	0	0	0	33	0	0	D_0__Archaea; D_1__Euryarchaeota; D_2__Methanomicrobia; D_3__Methanosarcinales; D_4__Methanoperedenaceae; D_5__Candidatus Methanoperedens											0	0	0	0	0	0	0.115729	0	0
7730	0	0	0	0	0	0	33	0	0	D_0__Bacteria; D_1__Actinobacteria; D_2__Actinobacteria; D_3__Micrococcales; D_4__Intrasporangiaceae											0	0	0	0	0	0	0.115729	0	0
10057	0	0	0	0	0	0	33	0	0	D_0__Bacteria; D_1__Actinobacteria; D_2__Actinobacteria; D_3__Micrococcales											0	0	0	0	0	0	0.115729	0	0
228	0	0	0	0	0	0	32	0	0	D_0__Archaea; D_1__Crenarchaeota; D_2__Bathyarchaeia											0	0	0	0	0	0	0.112222	0	0
936	0	0	0	0	0	0	32	0	0	D_0__Bacteria; D_1__Proteobacteria; D_2__Gammaproteobacteria; D_3__Pseudomonadales; D_4__Moraxellaceae; D_5__Alkanindiges; Ambiguous_taxa											0	0	0	0	0	0	0.112222	0	0
6254	0	0	0	0	0	0	32	0	0	D_0__Bacteria; D_1__Proteobacteria; D_2__Gammaproteobacteria; D_3__Betaproteobacteriales; D_4__Gallionellaceae											0	0	0	0	0	0	0.112222	0	0
9401	0	0	0	0	0	0	32	0	0	D_0__Bacteria; D_1__Proteobacteria; D_2__Gammaproteobacteria; D_3__Pseudomonadales; D_4__Moraxellaceae; D_5__Acinetobacter											0	0	0	0	0	0	0.112222	0	0
8615	0	2	2	0	0	0	31	0	0	D_0__Bacteria; D_1__Proteobacteria; D_2__Gammaproteobacteria; D_3__Betaproteobacteriales; D_4__Rhodocyclaceae; D_5__Denitratisoma		NT	FE								0	0.00701385	0.00701385	0	0	0	0.108715	0	0
215	0	0	0	0	0	0	31	0	0	D_0__Bacteria; D_1__Proteobacteria; D_2__Gammaproteobacteria; D_3__Betaproteobacteriales; D_4__Burkholderiaceae; D_5__Massilia											0	0	0	0	0	0	0.108715	0	0
259	0	0	0	0	0	0	31	0	0	D_0__Bacteria; D_1__Proteobacteria; D_2__Gammaproteobacteria; D_3__Methylococcales; D_4__Methylococcaceae											0	0	0	0	0	0	0.108715	0	0
302	0	0	0	0	0	0	31	0	0	D_0__Bacteria											0	0	0	0	0	0	0.108715	0	0
814	0	0	0	0	0	0	31	0	0	D_0__Bacteria; D_1__Proteobacteria; D_2__Gammaproteobacteria; D_3__Pseudomonadales; D_4__Moraxellaceae; D_5__Acinetobacter											0	0	0	0	0	0	0.108715	0	0
5610	0	0	0	0	0	0	31	0	0	D_0__Bacteria; D_1__Proteobacteria; D_2__Gammaproteobacteria; D_3__Pseudomonadales; D_4__Moraxellaceae; D_5__Acinetobacter											0	0	0	0	0	0	0.108715	0	0
8356	0	0	0	0	0	0	31	0	0	D_0__Bacteria; D_1__Proteobacteria; D_2__Gammaproteobacteria; D_3__Betaproteobacteriales; D_4__Gallionellaceae											0	0	0	0	0	0	0.108715	0	0
9032	0	0	0	0	0	0	31	0	0	D_0__Bacteria; D_1__Proteobacteria; D_2__Gammaproteobacteria; D_3__Betaproteobacteriales; D_4__Gallionellaceae											0	0	0	0	0	0	0.108715	0	0
156	0	0	0	0	0	0	30	0	0	D_0__Archaea; D_1__Euryarchaeota; D_2__Methanomicrobia; D_3__Methanosarcinales; D_4__Methanoperedenaceae; D_5__Candidatus Methanoperedens											0	0	0	0	0	0	0.105208	0	0
3598	0	0	0	0	0	0	30	0	0	D_0__Bacteria; D_1__Actinobacteria; D_2__Actinobacteria; D_3__Propionibacteriales; D_4__Nocardioidaceae; D_5__Nocardioides											0	0	0	0	0	0	0.105208	0	0
4654	0	0	0	0	0	0	30	0	0	D_0__Bacteria; D_1__Proteobacteria; D_2__Gammaproteobacteria; D_3__Pseudomonadales; D_4__Moraxellaceae; D_5__Acinetobacter											0	0	0	0	0	0	0.105208	0	0
8776	0	0	0	0	0	0	30	0	0	D_0__Bacteria; D_1__Proteobacteria; D_2__Gammaproteobacteria; D_3__Pseudomonadales; D_4__Moraxellaceae; D_5__Acinetobacter											0	0	0	0	0	0	0.105208	0	0
9239	0	0	0	0	0	0	30	0	0	D_0__Bacteria; D_1__Deinococcus-Thermus; D_2__Deinococci; D_3__Deinococcales; D_4__Deinococcaceae; D_5__Deinococcus											0	0	0	0	0	0	0.105208	0	0
318	0	0	0	0	0	0	29	0	0	D_0__Bacteria; D_1__Proteobacteria; D_2__Gammaproteobacteria; D_3__Betaproteobacteriales; D_4__Nitrosomonadaceae; D_5__MND1											0	0	0	0	0	0	0.101701	0	0
1204	0	0	0	0	0	0	29	0	0	D_0__Bacteria; D_1__Proteobacteria; D_2__Gammaproteobacteria; D_3__Pseudomonadales; D_4__Moraxellaceae; D_5__Acinetobacter											0	0	0	0	0	0	0.101701	0	0
1363	0	0	0	0	0	0	29	0	0	D_0__Bacteria; D_1__Proteobacteria; D_2__Gammaproteobacteria; D_3__Pseudomonadales; D_4__Moraxellaceae; D_5__Alkanindiges; Ambiguous_taxa											0	0	0	0	0	0	0.101701	0	0
3112	0	0	0	0	0	0	29	0	0	D_0__Bacteria; D_1__Actinobacteria; D_2__Actinobacteria; D_3__Propionibacteriales; D_4__Nocardioidaceae; D_5__Nocardioides; D_6__uncultured Nocardioides sp.											0	0	0	0	0	0	0.101701	0	0
6652	0	0	0	0	0	0	29	0	0	D_0__Bacteria; D_1__Proteobacteria; D_2__Gammaproteobacteria; D_3__Pseudomonadales; D_4__Moraxellaceae; D_5__Acinetobacter											0	0	0	0	0	0	0.101701	0	0
8915	0	0	0	0	0	0	29	0	0	D_0__Bacteria; D_1__Proteobacteria; D_2__Gammaproteobacteria; D_3__Pseudomonadales; D_4__Moraxellaceae; D_5__Acinetobacter											0	0	0	0	0	0	0.101701	0	0
9415	0	0	0	0	0	0	29	0	0	D_0__Bacteria; D_1__Proteobacteria; D_2__Gammaproteobacteria; D_3__Pseudomonadales; D_4__Moraxellaceae; D_5__Acinetobacter											0	0	0	0	0	0	0.101701	0	0
10644	0	0	0	0	0	0	29	0	0	D_0__Bacteria; D_1__Proteobacteria; D_2__Gammaproteobacteria											0	0	0	0	0	0	0.101701	0	0
1554	0	0	0	0	1	0	28	0	0	D_0__Bacteria; D_1__Proteobacteria; D_2__Gammaproteobacteria; D_3__Betaproteobacteriales; D_4__Burkholderiaceae					BIC						0	0	0	0	0.00350693	0	0.0981939	0	0
35	0	0	0	0	0	0	28	0	0	D_0__Bacteria; D_1__Nitrospirae; D_2__BMS9AB35											0	0	0	0	0	0	0.0981939	0	0
257	0	0	0	0	0	0	28	0	0	D_0__Bacteria; D_1__Proteobacteria; D_2__Gammaproteobacteria; D_3__Betaproteobacteriales; D_4__Gallionellaceae											0	0	0	0	0	0	0.0981939	0	0
960	0	0	0	0	0	0	28	0	0	D_0__Bacteria; D_1__Proteobacteria; D_2__Gammaproteobacteria; D_3__Pseudomonadales; D_4__Moraxellaceae; D_5__Acinetobacter											0	0	0	0	0	0	0.0981939	0	0
3406	0	0	0	0	0	0	28	0	0	D_0__Bacteria; D_1__Actinobacteria; D_2__Actinobacteria; D_3__Micrococcales; D_4__Intrasporangiaceae											0	0	0	0	0	0	0.0981939	0	0
3995	0	0	0	0	0	0	28	0	0	D_0__Bacteria; D_1__Proteobacteria; D_2__Gammaproteobacteria; D_3__Pseudomonadales; D_4__Moraxellaceae; D_5__Alkanindiges; Ambiguous_taxa											0	0	0	0	0	0	0.0981939	0	0
6061	0	0	0	0	0	0	28	0	0	D_0__Bacteria; D_1__Actinobacteria; D_2__Actinobacteria; D_3__Micrococcales; D_4__Intrasporangiaceae											0	0	0	0	0	0	0.0981939	0	0
6065	0	0	0	0	0	0	28	0	0	D_0__Bacteria; D_1__Proteobacteria; D_2__Alphaproteobacteria; D_3__Caulobacterales; D_4__Caulobacteraceae; D_5__Brevundimonas											0	0	0	0	0	0	0.0981939	0	0
6221	0	0	0	0	0	0	28	0	0	D_0__Bacteria; D_1__Proteobacteria; D_2__Gammaproteobacteria; D_3__Betaproteobacteriales											0	0	0	0	0	0	0.0981939	0	0
243	0	0	0	0	0	0	27	0	0	D_0__Bacteria; D_1__Bacteroidetes; D_2__Bacteroidia; D_3__Chitinophagales; D_4__Chitinophagaceae; D_5__Parasegetibacter; Ambiguous_taxa											0	0	0	0	0	0	0.094687	0	0
329	0	0	0	0	0	0	27	0	0	D_0__Bacteria; D_1__Omnitrophicaeota											0	0	0	0	0	0	0.094687	0	0
741	0	0	0	0	0	0	27	0	0	D_0__Bacteria											0	0	0	0	0	0	0.094687	0	0
1603	0	0	0	0	0	0	27	0	0	D_0__Bacteria; D_1__Actinobacteria; D_2__Actinobacteria; D_3__Micrococcales; D_4__Intrasporangiaceae											0	0	0	0	0	0	0.094687	0	0
3967	0	0	0	0	0	0	27	0	0	D_0__Bacteria; D_1__Actinobacteria; D_2__Actinobacteria; D_3__Micrococcales											0	0	0	0	0	0	0.094687	0	0
117	0	0	2	0	0	0	26	0	0	D_0__Bacteria; D_1__Proteobacteria; D_2__Alphaproteobacteria; D_3__Caulobacterales; D_4__Caulobacteraceae; D_5__Brevundimonas			FE								0	0	0.00701385	0	0	0	0.0911801	0	0
8918	0	0	1	0	0	0	26	0	0	D_0__Bacteria; D_1__Proteobacteria; D_2__Gammaproteobacteria; D_3__Pseudomonadales; D_4__Moraxellaceae; D_5__Acinetobacter			FE								0	0	0.00350693	0	0	0	0.0911801	0	0
110	0	0	0	0	0	0	26	0	0	D_0__Bacteria; D_1__Proteobacteria; D_2__Gammaproteobacteria; D_3__Betaproteobacteriales; D_4__Gallionellaceae											0	0	0	0	0	0	0.0911801	0	0
194	0	0	0	0	0	0	26	0	0	D_0__Bacteria; D_1__Proteobacteria; D_2__Gammaproteobacteria; D_3__Betaproteobacteriales; D_4__Rhodocyclaceae											0	0	0	0	0	0	0.0911801	0	0
3134	0	0	0	0	0	0	26	0	0	D_0__Bacteria; D_1__Proteobacteria; D_2__Gammaproteobacteria; D_3__Pseudomonadales; D_4__Moraxellaceae; D_5__Alkanindiges; Ambiguous_taxa											0	0	0	0	0	0	0.0911801	0	0
4021	0	0	0	0	0	0	26	0	0	D_0__Bacteria; D_1__Proteobacteria; D_2__Gammaproteobacteria; D_3__Pseudomonadales; D_4__Moraxellaceae; D_5__Acinetobacter											0	0	0	0	0	0	0.0911801	0	0
9588	0	0	0	0	0	0	26	0	0	D_0__Bacteria; D_1__Actinobacteria; D_2__Actinobacteria; D_3__Propionibacteriales; D_4__Nocardioidaceae; D_5__Nocardioides; D_6__uncultured Nocardioides sp.											0	0	0	0	0	0	0.0911801	0	0
10421	0	0	0	0	0	0	26	0	0	D_0__Bacteria; D_1__Proteobacteria; D_2__Gammaproteobacteria; D_3__Pseudomonadales; D_4__Moraxellaceae; D_5__Acinetobacter											0	0	0	0	0	0	0.0911801	0	0
320	0	0	0	0	0	1	25	0	0	D_0__Bacteria; D_1__Proteobacteria; D_2__Alphaproteobacteria; D_3__Caulobacterales; D_4__Caulobacteraceae; D_5__Brevundimonas						MIX					0	0	0	0	0	0.00350693	0.0876732	0	0
148	0	0	0	0	0	0	25	0	0	D_0__Bacteria; D_1__Omnitrophicaeota											0	0	0	0	0	0	0.0876732	0	0
275	0	0	0	0	0	0	25	0	0	D_0__Bacteria; D_1__Actinobacteria; D_2__Actinobacteria; D_3__Propionibacteriales; D_4__Nocardioidaceae; D_5__Nocardioides											0	0	0	0	0	0	0.0876732	0	0
299	0	0	0	0	0	0	25	0	0	D_0__Bacteria; D_1__Proteobacteria; D_2__Deltaproteobacteria											0	0	0	0	0	0	0.0876732	0	0
496	0	0	0	0	0	0	25	0	0	D_0__Bacteria; D_1__Proteobacteria; D_2__Gammaproteobacteria; D_3__Betaproteobacteriales											0	0	0	0	0	0	0.0876732	0	0
6582	0	0	0	0	0	1	24	0	0	D_0__Bacteria; D_1__Proteobacteria; D_2__Alphaproteobacteria; D_3__Caulobacterales; D_4__Caulobacteraceae; D_5__Brevundimonas						MIX					0	0	0	0	0	0.00350693	0.0841662	0	0
319	0	0	0	0	0	0	24	0	0	D_0__Bacteria; D_1__Actinobacteria; D_2__Rubrobacteria; D_3__Rubrobacterales; D_4__Rubrobacteriaceae; D_5__Rubrobacter											0	0	0	0	0	0	0.0841662	0	0
468	0	0	0	0	0	0	24	0	0	D_0__Bacteria; D_1__Armatimonadetes											0	0	0	0	0	0	0.0841662	0	0
2558	0	0	0	0	0	0	24	0	0	D_0__Bacteria; D_1__Proteobacteria; D_2__Gammaproteobacteria; D_3__Pseudomonadales; D_4__Moraxellaceae; D_5__Acinetobacter											0	0	0	0	0	0	0.0841662	0	0
4587	0	0	0	0	0	0	24	0	0	D_0__Bacteria; D_1__Proteobacteria; D_2__Gammaproteobacteria; D_3__Betaproteobacteriales											0	0	0	0	0	0	0.0841662	0	0
7847	0	0	0	0	0	0	24	0	0	D_0__Bacteria; D_1__Actinobacteria; D_2__Actinobacteria; D_3__Micrococcales; D_4__Intrasporangiaceae											0	0	0	0	0	0	0.0841662	0	0
8979	0	0	0	0	0	0	24	0	0	D_0__Bacteria; D_1__Proteobacteria; D_2__Gammaproteobacteria; D_3__Pseudomonadales; D_4__Moraxellaceae; D_5__Acinetobacter											0	0	0	0	0	0	0.0841662	0	0
324	0	0	0	0	0	0	23	0	0	D_0__Bacteria; D_1__Firmicutes; D_2__Clostridia; D_3__Clostridiales; D_4__Clostridiaceae 1; D_5__Clostridium sensu stricto 3											0	0	0	0	0	0	0.0806593	0	0
2147	0	0	0	0	0	0	23	0	0	D_0__Bacteria; D_1__Proteobacteria; D_2__Gammaproteobacteria; D_3__Pseudomonadales; D_4__Moraxellaceae											0	0	0	0	0	0	0.0806593	0	0
6365	0	0	0	0	0	0	23	0	0	D_0__Bacteria; D_1__Proteobacteria; D_2__Gammaproteobacteria											0	0	0	0	0	0	0.0806593	0	0
91	0	0	0	0	0	0	22	0	0	D_0__Bacteria; D_1__Proteobacteria; D_2__Gammaproteobacteria; D_3__Betaproteobacteriales											0	0	0	0	0	0	0.0771524	0	0
304	0	0	0	0	0	0	22	0	0	D_0__Bacteria; D_1__Bacteroidetes; D_2__Bacteroidia; D_3__Cytophagales; D_4__Spirosomaceae; D_5__Spirosoma; D_6__Spirosoma sp. 209											0	0	0	0	0	0	0.0771524	0	0
2474	0	0	0	0	0	0	22	0	0	D_0__Bacteria; D_1__Actinobacteria; D_2__Actinobacteria; D_3__Micrococcales; D_4__Intrasporangiaceae											0	0	0	0	0	0	0.0771524	0	0
4709	0	0	0	0	0	0	22	0	0	D_0__Bacteria; D_1__Proteobacteria; D_2__Gammaproteobacteria; D_3__Pseudomonadales; D_4__Moraxellaceae; D_5__Alkanindiges; Ambiguous_taxa											0	0	0	0	0	0	0.0771524	0	0
5285	0	0	0	0	0	0	22	0	0	D_0__Bacteria; D_1__Proteobacteria; D_2__Gammaproteobacteria											0	0	0	0	0	0	0.0771524	0	0
5355	0	0	0	0	0	0	22	0	0	D_0__Bacteria; D_1__Proteobacteria; D_2__Gammaproteobacteria; D_3__Betaproteobacteriales; D_4__Gallionellaceae; D_5__Sideroxydans											0	0	0	0	0	0	0.0771524	0	0
6438	0	0	0	0	0	0	22	0	0	D_0__Bacteria; D_1__Proteobacteria; D_2__Gammaproteobacteria											0	0	0	0	0	0	0.0771524	0	0
72	0	197	30	0	0	0	21	0	0	D_0__Bacteria; D_1__Acidobacteria; D_2__Holophagae; D_3__Holophagales; D_4__Holophagaceae; D_5__Geothrix; D_6__uncultured bacterium		NT	FE								0	0.690864	0.105208	0	0	0	0.0736454	0	0
81	0	0	16	0	0	0	21	0	0	D_0__Bacteria; D_1__Proteobacteria; D_2__Alphaproteobacteria; D_3__Sphingomonadales; D_4__Sphingomonadaceae; D_5__Porphyrobacter; Ambiguous_taxa			FE								0	0	0.0561108	0	0	0	0.0736454	0	0
290	0	0	0	0	0	0	21	0	0	D_0__Bacteria; D_1__Chloroflexi; D_2__JG30-KF-CM66; Ambiguous_taxa; Ambiguous_taxa; Ambiguous_taxa; Ambiguous_taxa											0	0	0	0	0	0	0.0736454	0	0
563	0	0	0	0	0	0	21	0	0	D_0__Bacteria; D_1__Proteobacteria; D_2__Gammaproteobacteria; D_3__Betaproteobacteriales											0	0	0	0	0	0	0.0736454	0	0
1487	0	0	0	0	0	0	21	0	0	D_0__Bacteria; D_1__Actinobacteria; D_2__Actinobacteria; D_3__Micrococcales; D_4__Intrasporangiaceae											0	0	0	0	0	0	0.0736454	0	0
2278	0	0	0	0	0	0	21	0	0	D_0__Bacteria; D_1__Proteobacteria; D_2__Gammaproteobacteria; D_3__Pseudomonadales; D_4__Moraxellaceae; D_5__Acinetobacter											0	0	0	0	0	0	0.0736454	0	0
3106	0	0	0	0	0	0	21	0	0	D_0__Bacteria; D_1__Proteobacteria; D_2__Gammaproteobacteria											0	0	0	0	0	0	0.0736454	0	0
4664	0	0	0	0	0	0	21	0	0	D_0__Bacteria; D_1__Actinobacteria; D_2__Actinobacteria; D_3__Micrococcales; D_4__Intrasporangiaceae; D_5__Ornithinimicrobium											0	0	0	0	0	0	0.0736454	0	0
5987	0	0	0	0	0	0	21	0	0	D_0__Bacteria; D_1__Bacteroidetes; D_2__Ignavibacteria; D_3__Ignavibacteriales; D_4__BSV40; D_5__uncultured bacterium; D_6__uncultured bacterium											0	0	0	0	0	0	0.0736454	0	0
8811	0	0	0	0	0	0	21	0	0	D_0__Bacteria; D_1__Proteobacteria; D_2__Gammaproteobacteria; D_3__Betaproteobacteriales; D_4__Gallionellaceae; D_5__Sideroxydans											0	0	0	0	0	0	0.0736454	0	0
10045	0	0	0	0	0	0	21	0	0	D_0__Bacteria; D_1__Proteobacteria; D_2__Gammaproteobacteria; D_3__Pseudomonadales; D_4__Moraxellaceae; D_5__Acinetobacter; D_6__Acinetobacter lwoffii											0	0	0	0	0	0	0.0736454	0	0
7627	0	1518	124	0	0	0	20	0	0	D_0__Bacteria; D_1__Bacteroidetes; D_2__Bacteroidia; D_3__Flavobacteriales; D_4__Weeksellaceae; D_5__Chryseobacterium; D_6__uncultured bacterium		NT	FE								0	5.32351	0.434859	0	0	0	0.0701385	0	0
55	0	0	0	0	0	0	20	0	0	D_0__Bacteria; D_1__Deinococcus-Thermus; D_2__Deinococci; D_3__Deinococcales; D_4__Deinococcaceae; D_5__Deinococcus											0	0	0	0	0	0	0.0701385	0	0
240	0	0	0	0	0	0	20	0	0	D_0__Bacteria; D_1__Proteobacteria; D_2__Deltaproteobacteria; D_3__MBNT15; Ambiguous_taxa; Ambiguous_taxa; Ambiguous_taxa											0	0	0	0	0	0	0.0701385	0	0
347	0	0	0	0	0	0	20	0	0	D_0__Bacteria											0	0	0	0	0	0	0.0701385	0	0
2122	0	0	0	0	0	0	20	0	0	D_0__Bacteria; D_1__Proteobacteria; D_2__Gammaproteobacteria; D_3__Pseudomonadales; D_4__Moraxellaceae; D_5__Acinetobacter											0	0	0	0	0	0	0.0701385	0	0
3067	0	0	0	0	0	0	20	0	0	D_0__Bacteria; D_1__Proteobacteria; D_2__Gammaproteobacteria; D_3__Pseudomonadales; D_4__Moraxellaceae; D_5__Alkanindiges; Ambiguous_taxa											0	0	0	0	0	0	0.0701385	0	0
5920	0	0	0	0	0	0	20	0	0	D_0__Bacteria; D_1__Proteobacteria; D_2__Gammaproteobacteria; D_3__Betaproteobacteriales; D_4__Gallionellaceae											0	0	0	0	0	0	0.0701385	0	0
6030	0	0	0	0	0	0	20	0	0	D_0__Bacteria; D_1__Proteobacteria; D_2__Gammaproteobacteria; D_3__Betaproteobacteriales; D_4__Gallionellaceae											0	0	0	0	0	0	0.0701385	0	0
6315	0	0	0	0	0	0	20	0	0	D_0__Bacteria; D_1__Deinococcus-Thermus; D_2__Deinococci; D_3__Deinococcales; D_4__Deinococcaceae; D_5__Deinococcus											0	0	0	0	0	0	0.0701385	0	0
6698	0	0	0	0	0	0	20	0	0	D_0__Bacteria; D_1__Omnitrophicaeota; D_2__uncultured bacterium; D_3__uncultured bacterium; D_4__uncultured bacterium; D_5__uncultured bacterium; D_6__uncultured bacterium											0	0	0	0	0	0	0.0701385	0	0
8314	0	0	0	0	0	0	20	0	0	D_0__Bacteria; D_1__Proteobacteria; D_2__Gammaproteobacteria											0	0	0	0	0	0	0.0701385	0	0
8592	0	0	0	0	0	0	20	0	0	D_0__Bacteria; D_1__Proteobacteria; D_2__Gammaproteobacteria; D_3__Betaproteobacteriales; D_4__Gallionellaceae; D_5__Sideroxydans											0	0	0	0	0	0	0.0701385	0	0
9430	0	0	0	0	0	0	20	0	0	D_0__Bacteria; D_1__Proteobacteria; D_2__Gammaproteobacteria; D_3__Pseudomonadales; D_4__Moraxellaceae; D_5__Acinetobacter											0	0	0	0	0	0	0.0701385	0	0
272	0	0	0	0	0	0	19	0	0	D_0__Bacteria; D_1__Proteobacteria; D_2__Gammaproteobacteria; D_3__Betaproteobacteriales											0	0	0	0	0	0	0.0666316	0	0
313	0	0	0	0	0	0	19	0	0	D_0__Bacteria; D_1__Proteobacteria; D_2__Alphaproteobacteria; D_3__Sphingomonadales; D_4__Sphingomonadaceae											0	0	0	0	0	0	0.0666316	0	0
361	0	0	0	0	0	0	19	0	0	D_0__Bacteria; D_1__Chloroflexi; D_2__Dehalococcoidia; D_3__S085; D_4__uncultured bacterium; D_5__uncultured bacterium; D_6__uncultured bacterium											0	0	0	0	0	0	0.0666316	0	0
367	0	0	0	0	0	0	19	0	0	D_0__Bacteria											0	0	0	0	0	0	0.0666316	0	0
432	0	0	0	0	0	0	19	0	0	D_0__Bacteria; D_1__Armatimonadetes; D_2__Fimbriimonadia; D_3__Fimbriimonadales; D_4__uncultured bacterium; D_5__uncultured bacterium; D_6__uncultured bacterium											0	0	0	0	0	0	0.0666316	0	0
549	0	0	0	0	0	0	19	0	0	D_0__Bacteria; D_1__Proteobacteria; D_2__Gammaproteobacteria; D_3__Betaproteobacteriales											0	0	0	0	0	0	0.0666316	0	0
716	0	0	0	0	0	0	19	0	0	D_0__Bacteria; D_1__Proteobacteria; D_2__Gammaproteobacteria; D_3__Betaproteobacteriales; D_4__Rhodocyclaceae											0	0	0	0	0	0	0.0666316	0	0
1141	0	0	0	0	0	0	19	0	0	D_0__Bacteria; D_1__Spirochaetes; D_2__Leptospirae; D_3__Leptospirales; D_4__Leptospiraceae; D_5__Turneriella; Ambiguous_taxa											0	0	0	0	0	0	0.0666316	0	0
2600	0	0	0	0	0	0	19	0	0	D_0__Bacteria; D_1__Actinobacteria; D_2__Actinobacteria; D_3__Micrococcales; D_4__Intrasporangiaceae											0	0	0	0	0	0	0.0666316	0	0
4112	0	0	0	0	0	0	19	0	0	D_0__Bacteria; D_1__Proteobacteria; D_2__Gammaproteobacteria; D_3__Pseudomonadales; D_4__Moraxellaceae; D_5__Acinetobacter											0	0	0	0	0	0	0.0666316	0	0
6299	0	0	0	0	0	0	19	0	0	D_0__Bacteria; D_1__Proteobacteria; D_2__Gammaproteobacteria; D_3__Betaproteobacteriales; D_4__Gallionellaceae; D_5__Sideroxydans											0	0	0	0	0	0	0.0666316	0	0
9422	0	0	0	0	0	0	19	0	0	D_0__Bacteria; D_1__Actinobacteria; D_2__Actinobacteria; D_3__Propionibacteriales; D_4__Nocardioidaceae; D_5__Nocardioides; D_6__uncultured Nocardioides sp.											0	0	0	0	0	0	0.0666316	0	0
10586	0	0	0	0	0	0	19	0	0	D_0__Bacteria; D_1__Proteobacteria; D_2__Gammaproteobacteria; D_3__Betaproteobacteriales; D_4__Gallionellaceae											0	0	0	0	0	0	0.0666316	0	0
341	0	0	0	0	0	0	18	0	0	D_0__Archaea; D_1__Euryarchaeota; D_2__Methanomicrobia; D_3__Methanosarcinales; D_4__Methanoperedenaceae; D_5__Candidatus Methanoperedens											0	0	0	0	0	0	0.0631247	0	0
353	0	0	0	0	0	0	18	0	0	D_0__Bacteria; D_1__Omnitrophicaeota											0	0	0	0	0	0	0.0631247	0	0
453	0	0	0	0	0	0	18	0	0	D_0__Bacteria; D_1__Omnitrophicaeota; D_2__uncultured bacterium; D_3__uncultured bacterium; D_4__uncultured bacterium; D_5__uncultured bacterium; D_6__uncultured bacterium											0	0	0	0	0	0	0.0631247	0	0
2581	0	0	0	0	0	0	18	0	0	D_0__Bacteria; D_1__Proteobacteria; D_2__Gammaproteobacteria; D_3__Betaproteobacteriales; D_4__Burkholderiaceae; D_5__Massilia											0	0	0	0	0	0	0.0631247	0	0
2677	0	0	0	0	0	0	18	0	0	D_0__Bacteria; D_1__Actinobacteria; D_2__Actinobacteria; D_3__Micrococcales; D_4__Intrasporangiaceae; D_5__Ornithinimicrobium; Ambiguous_taxa											0	0	0	0	0	0	0.0631247	0	0
3104	0	0	0	0	0	0	18	0	0	D_0__Bacteria; D_1__Proteobacteria; D_2__Gammaproteobacteria; D_3__Betaproteobacteriales; D_4__Gallionellaceae											0	0	0	0	0	0	0.0631247	0	0
5326	0	0	0	0	0	0	18	0	0	D_0__Bacteria; D_1__Proteobacteria; D_2__Gammaproteobacteria; D_3__Pseudomonadales; D_4__Moraxellaceae; D_5__Acinetobacter											0	0	0	0	0	0	0.0631247	0	0
5826	0	0	0	0	0	0	18	0	0	D_0__Bacteria; D_1__Actinobacteria; D_2__Actinobacteria; D_3__Micrococcales; D_4__Intrasporangiaceae											0	0	0	0	0	0	0.0631247	0	0
7428	0	0	0	0	0	0	18	0	0	D_0__Bacteria; D_1__Proteobacteria; D_2__Gammaproteobacteria; D_3__Betaproteobacteriales; D_4__Gallionellaceae											0	0	0	0	0	0	0.0631247	0	0
10261	0	0	0	0	0	0	18	0	0	D_0__Bacteria; D_1__Proteobacteria; D_2__Gammaproteobacteria; D_3__Pseudomonadales; D_4__Moraxellaceae; D_5__Alkanindiges; Ambiguous_taxa											0	0	0	0	0	0	0.0631247	0	0
10583	0	0	0	0	0	0	18	0	0	D_0__Bacteria; D_1__Proteobacteria; D_2__Gammaproteobacteria											0	0	0	0	0	0	0.0631247	0	0
6273	0	0	0	0	10	0	17	0	0	D_0__Bacteria; D_1__Proteobacteria; D_2__Gammaproteobacteria; D_3__Betaproteobacteriales; D_4__Burkholderiaceae					BIC						0	0	0	0	0.0350693	0	0.0596177	0	0
244	0	0	0	0	0	0	17	0	0	D_0__Bacteria; D_1__Proteobacteria; D_2__Alphaproteobacteria; D_3__Rhodobacterales; D_4__Rhodobacteraceae; D_5__Rubellimicrobium											0	0	0	0	0	0	0.0596177	0	0
433	0	0	0	0	0	0	17	0	0	D_0__Bacteria; D_1__Proteobacteria; D_2__Gammaproteobacteria; D_3__Betaproteobacteriales											0	0	0	0	0	0	0.0596177	0	0
461	0	0	0	0	0	0	17	0	0	D_0__Bacteria; D_1__Nitrospirae; D_2__Nitrospira; D_3__Nitrospirales; D_4__Nitrospiraceae; D_5__Nitrospira; Ambiguous_taxa											0	0	0	0	0	0	0.0596177	0	0
3378	0	0	0	0	0	0	17	0	0	D_0__Bacteria; D_1__Proteobacteria; D_2__Gammaproteobacteria; D_3__Pseudomonadales; D_4__Moraxellaceae; D_5__Acinetobacter											0	0	0	0	0	0	0.0596177	0	0
4070	0	0	0	0	0	0	17	0	0	D_0__Bacteria; D_1__Proteobacteria; D_2__Gammaproteobacteria; D_3__Betaproteobacteriales; D_4__Gallionellaceae; D_5__Sideroxydans											0	0	0	0	0	0	0.0596177	0	0
6083	0	0	0	0	0	0	17	0	0	D_0__Bacteria; D_1__Proteobacteria; D_2__Gammaproteobacteria; D_3__Pseudomonadales; D_4__Moraxellaceae; D_5__Acinetobacter											0	0	0	0	0	0	0.0596177	0	0
6097	0	0	0	0	0	0	17	0	0	D_0__Bacteria; D_1__Proteobacteria; D_2__Gammaproteobacteria; D_3__Betaproteobacteriales; D_4__Gallionellaceae											0	0	0	0	0	0	0.0596177	0	0
6312	0	0	0	0	0	0	17	0	0	D_0__Bacteria; D_1__Proteobacteria; D_2__Alphaproteobacteria; D_3__Caulobacterales; D_4__Caulobacteraceae; D_5__Brevundimonas											0	0	0	0	0	0	0.0596177	0	0
8604	0	0	0	0	0	0	17	0	0	D_0__Bacteria; D_1__Proteobacteria; D_2__Gammaproteobacteria; D_3__Pseudomonadales; D_4__Moraxellaceae; D_5__Acinetobacter											0	0	0	0	0	0	0.0596177	0	0
9130	0	0	0	0	0	0	17	0	0	D_0__Bacteria; D_1__Actinobacteria; D_2__Actinobacteria; D_3__Propionibacteriales; D_4__Nocardioidaceae; D_5__Nocardioides											0	0	0	0	0	0	0.0596177	0	0
10425	0	0	0	0	0	0	17	0	0	D_0__Bacteria; D_1__Proteobacteria; D_2__Gammaproteobacteria; D_3__Betaproteobacteriales											0	0	0	0	0	0	0.0596177	0	0
327	0	0	0	0	0	0	16	0	0	D_0__Bacteria; D_1__Proteobacteria; D_2__Gammaproteobacteria; D_3__Pseudomonadales; D_4__Moraxellaceae; D_5__Acinetobacter											0	0	0	0	0	0	0.0561108	0	0
398	0	0	0	0	0	0	16	0	0	D_0__Bacteria; D_1__Proteobacteria; D_2__Alphaproteobacteria; D_3__Sphingomonadales; D_4__Sphingomonadaceae											0	0	0	0	0	0	0.0561108	0	0
407	0	0	0	0	0	0	16	0	0	D_0__Bacteria; D_1__Proteobacteria; D_2__Alphaproteobacteria; D_3__Rhodobacterales; D_4__Rhodobacteraceae											0	0	0	0	0	0	0.0561108	0	0
1391	0	0	0	0	0	0	16	0	0	D_0__Bacteria; D_1__Proteobacteria; D_2__Deltaproteobacteria; D_3__Sva0485											0	0	0	0	0	0	0.0561108	0	0
2619	0	0	0	0	0	0	16	0	0	D_0__Bacteria; D_1__Chloroflexi; D_2__Dehalococcoidia; D_3__S085; D_4__uncultured bacterium; D_5__uncultured bacterium; D_6__uncultured bacterium											0	0	0	0	0	0	0.0561108	0	0
3542	0	0	0	0	0	0	16	0	0	D_0__Bacteria; D_1__Proteobacteria; D_2__Gammaproteobacteria; D_3__Betaproteobacteriales; D_4__Gallionellaceae											0	0	0	0	0	0	0.0561108	0	0
5843	0	0	0	0	0	0	16	0	0	D_0__Bacteria; D_1__Proteobacteria; D_2__Deltaproteobacteria; D_3__Sva0485; D_4__uncultured delta proteobacterium; D_5__uncultured delta proteobacterium; D_6__uncultured delta proteobacterium											0	0	0	0	0	0	0.0561108	0	0
6538	0	0	0	0	0	0	16	0	0	D_0__Bacteria; D_1__Actinobacteria; D_2__Actinobacteria; D_3__Micrococcales; D_4__Intrasporangiaceae											0	0	0	0	0	0	0.0561108	0	0
7290	0	0	0	0	0	0	16	0	0	D_0__Bacteria; D_1__Proteobacteria; D_2__Gammaproteobacteria											0	0	0	0	0	0	0.0561108	0	0
8160	0	0	0	0	0	0	16	0	0	D_0__Bacteria; D_1__Proteobacteria; D_2__Gammaproteobacteria; D_3__Pseudomonadales; D_4__Moraxellaceae; D_5__Acinetobacter											0	0	0	0	0	0	0.0561108	0	0
8360	0	0	0	0	0	0	16	0	0	D_0__Bacteria; D_1__Actinobacteria; D_2__Actinobacteria; D_3__Micrococcales; D_4__Intrasporangiaceae; D_5__Ornithinimicrobium; Ambiguous_taxa											0	0	0	0	0	0	0.0561108	0	0
8699	0	0	0	0	0	0	16	0	0	D_0__Bacteria; D_1__Actinobacteria; D_2__Actinobacteria; D_3__Propionibacteriales; D_4__Nocardioidaceae; D_5__Nocardioides											0	0	0	0	0	0	0.0561108	0	0
8822	0	0	0	0	0	0	16	0	0	D_0__Bacteria; D_1__Actinobacteria; D_2__Actinobacteria; D_3__Propionibacteriales; D_4__Nocardioidaceae; D_5__Nocardioides											0	0	0	0	0	0	0.0561108	0	0
9843	0	0	0	0	0	0	16	0	0	D_0__Bacteria; D_1__Proteobacteria; D_2__Gammaproteobacteria; D_3__Betaproteobacteriales; D_4__Rhodocyclaceae											0	0	0	0	0	0	0.0561108	0	0
1758	0	0	0	0	0	1	15	0	0	D_0__Bacteria; D_1__Proteobacteria; D_2__Alphaproteobacteria; D_3__Caulobacterales; D_4__Caulobacteraceae; D_5__Brevundimonas						MIX					0	0	0	0	0	0.00350693	0.0526039	0	0
606	0	0	0	0	5	0	15	0	0	D_0__Bacteria; D_1__Proteobacteria; D_2__Gammaproteobacteria; D_3__Betaproteobacteriales					BIC						0	0	0	0	0.0175346	0	0.0526039	0	0
89	0	0	0	0	0	0	15	0	0	D_0__Bacteria; D_1__Proteobacteria; D_2__Gammaproteobacteria; D_3__Betaproteobacteriales; D_4__Rhodocyclaceae											0	0	0	0	0	0	0.0526039	0	0
312	0	0	0	0	0	0	15	0	0	D_0__Bacteria; D_1__Chloroflexi; D_2__JG30-KF-CM66											0	0	0	0	0	0	0.0526039	0	0
389	0	0	0	0	0	0	15	0	0	D_0__Bacteria; D_1__Actinobacteria; D_2__Actinobacteria; D_3__Micrococcales; D_4__Intrasporangiaceae											0	0	0	0	0	0	0.0526039	0	0
399	0	0	0	0	0	0	15	0	0	D_0__Bacteria; D_1__Actinobacteria; D_2__Thermoleophilia; D_3__Solirubrobacterales; D_4__Solirubrobacteraceae; D_5__Patulibacter; D_6__uncultured bacterium											0	0	0	0	0	0	0.0526039	0	0
437	0	0	0	0	0	0	15	0	0	D_0__Bacteria											0	0	0	0	0	0	0.0526039	0	0
494	0	0	0	0	0	0	15	0	0	D_0__Bacteria; D_1__Proteobacteria; D_2__Deltaproteobacteria; D_3__Syntrophobacterales; D_4__Syntrophaceae; D_5__Smithella											0	0	0	0	0	0	0.0526039	0	0
2977	0	0	0	0	0	0	15	0	0	D_0__Bacteria; D_1__Actinobacteria; D_2__Actinobacteria; D_3__Micrococcales; D_4__Intrasporangiaceae											0	0	0	0	0	0	0.0526039	0	0
3156	0	0	0	0	0	0	15	0	0	D_0__Bacteria; D_1__Actinobacteria; D_2__Actinobacteria; D_3__Micrococcales; D_4__Intrasporangiaceae											0	0	0	0	0	0	0.0526039	0	0
4890	0	0	0	0	0	0	15	0	0	D_0__Bacteria; D_1__Proteobacteria; D_2__Alphaproteobacteria; D_3__Caulobacterales; D_4__Caulobacteraceae; D_5__Brevundimonas											0	0	0	0	0	0	0.0526039	0	0
6150	0	0	0	0	0	0	15	0	0	D_0__Bacteria; D_1__Proteobacteria; D_2__Alphaproteobacteria; D_3__Sphingomonadales; D_4__Sphingomonadaceae											0	0	0	0	0	0	0.0526039	0	0
6502	0	0	0	0	0	0	15	0	0	D_0__Bacteria; D_1__Actinobacteria; D_2__Actinobacteria; D_3__Micrococcales; D_4__Intrasporangiaceae											0	0	0	0	0	0	0.0526039	0	0
7573	0	0	0	0	0	0	15	0	0	D_0__Bacteria; D_1__Actinobacteria; D_2__Actinobacteria; D_3__Micrococcales; D_4__Intrasporangiaceae											0	0	0	0	0	0	0.0526039	0	0
7622	0	0	0	0	0	0	15	0	0	D_0__Bacteria; D_1__Proteobacteria; D_2__Gammaproteobacteria; D_3__Pseudomonadales; D_4__Moraxellaceae; D_5__Acinetobacter											0	0	0	0	0	0	0.0526039	0	0
2768	0	1	0	0	0	0	14	0	0	D_0__Bacteria; D_1__Proteobacteria; D_2__Gammaproteobacteria; D_3__Betaproteobacteriales; D_4__Rhodocyclaceae		NT									0	0.00350693	0	0	0	0	0.049097	0	0
182	0	0	0	0	0	0	14	0	0	D_0__Bacteria; D_1__Proteobacteria; D_2__Alphaproteobacteria; D_3__Rhizobiales; D_4__Rhizobiaceae; D_5__Aureimonas; Ambiguous_taxa											0	0	0	0	0	0	0.049097	0	0
354	0	0	0	0	0	0	14	0	0	D_0__Bacteria; D_1__Actinobacteria; D_2__Acidimicrobiia; D_3__Microtrichales; D_4__Ilumatobacteraceae; D_5__uncultured											0	0	0	0	0	0	0.049097	0	0
442	0	0	0	0	0	0	14	0	0	D_0__Bacteria											0	0	0	0	0	0	0.049097	0	0
711	0	0	0	0	0	0	14	0	0	D_0__Bacteria; D_1__Deinococcus-Thermus; D_2__Deinococci; D_3__Deinococcales; D_4__Deinococcaceae; D_5__Deinococcus											0	0	0	0	0	0	0.049097	0	0
1681	0	0	0	0	0	0	14	0	0	D_0__Bacteria; D_1__Proteobacteria; D_2__Alphaproteobacteria; D_3__Sphingomonadales; D_4__Sphingomonadaceae											0	0	0	0	0	0	0.049097	0	0
2020	0	0	0	0	0	0	14	0	0	D_0__Bacteria; D_1__Proteobacteria; D_2__Alphaproteobacteria; D_3__Sphingomonadales; D_4__Sphingomonadaceae											0	0	0	0	0	0	0.049097	0	0
3410	0	0	0	0	0	0	14	0	0	D_0__Bacteria; D_1__Proteobacteria; D_2__Gammaproteobacteria; D_3__Betaproteobacteriales; D_4__Rhodocyclaceae											0	0	0	0	0	0	0.049097	0	0
3893	0	0	0	0	0	0	14	0	0	D_0__Bacteria; D_1__Proteobacteria; D_2__Gammaproteobacteria; D_3__Betaproteobacteriales; D_4__Gallionellaceae; D_5__Sideroxydans											0	0	0	0	0	0	0.049097	0	0
3998	0	0	0	0	0	0	14	0	0	D_0__Bacteria; D_1__Proteobacteria; D_2__Gammaproteobacteria											0	0	0	0	0	0	0.049097	0	0
4272	0	0	0	0	0	0	14	0	0	D_0__Bacteria; D_1__Actinobacteria; D_2__Actinobacteria; D_3__Micrococcales											0	0	0	0	0	0	0.049097	0	0
4581	0	0	0	0	0	0	14	0	0	D_0__Bacteria; D_1__Proteobacteria; D_2__Gammaproteobacteria; D_3__Pseudomonadales; D_4__Moraxellaceae; D_5__Acinetobacter											0	0	0	0	0	0	0.049097	0	0
5011	0	0	0	0	0	0	14	0	0	D_0__Bacteria; D_1__Proteobacteria; D_2__Gammaproteobacteria; D_3__Betaproteobacteriales; D_4__Gallionellaceae											0	0	0	0	0	0	0.049097	0	0
7359	0	0	0	0	0	0	14	0	0	D_0__Bacteria; D_1__Actinobacteria; D_2__Actinobacteria; D_3__Propionibacteriales; D_4__Nocardioidaceae; D_5__Nocardioides											0	0	0	0	0	0	0.049097	0	0
8248	0	0	0	0	0	0	14	0	0	D_0__Bacteria; D_1__Proteobacteria; D_2__Gammaproteobacteria; D_3__Betaproteobacteriales; D_4__Rhodocyclaceae											0	0	0	0	0	0	0.049097	0	0
8722	0	0	0	0	0	0	14	0	0	D_0__Bacteria; D_1__Proteobacteria; D_2__Gammaproteobacteria; D_3__Pseudomonadales; D_4__Moraxellaceae; D_5__Acinetobacter											0	0	0	0	0	0	0.049097	0	0
9592	0	0	0	0	0	0	14	0	0	D_0__Bacteria; D_1__Proteobacteria; D_2__Gammaproteobacteria; D_3__Betaproteobacteriales; D_4__Gallionellaceae											0	0	0	0	0	0	0.049097	0	0
9713	0	0	0	0	0	0	14	0	0	D_0__Bacteria; D_1__Actinobacteria; D_2__Actinobacteria; D_3__Propionibacteriales; D_4__Nocardioidaceae; D_5__Nocardioides											0	0	0	0	0	0	0.049097	0	0
10140	0	0	0	0	0	0	14	0	0	D_0__Bacteria; D_1__Actinobacteria; D_2__Actinobacteria; D_3__Propionibacteriales; D_4__Nocardioidaceae; D_5__Nocardioides											0	0	0	0	0	0	0.049097	0	0
454	0	0	0	0	1	0	13	0	0	D_0__Bacteria; D_1__Proteobacteria; D_2__Gammaproteobacteria; D_3__Betaproteobacteriales; D_4__Burkholderiaceae					BIC						0	0	0	0	0.00350693	0	0.04559	0	0
9387	0	0	2	0	0	0	13	0	0	D_0__Bacteria; D_1__Proteobacteria; D_2__Gammaproteobacteria; D_3__Pseudomonadales; D_4__Moraxellaceae; D_5__Acinetobacter; D_6__Acinetobacter lwoffii			FE								0	0	0.00701385	0	0	0	0.04559	0	0
323	0	0	0	0	0	0	13	0	0	D_0__Bacteria; D_1__Spirochaetes; D_2__Leptospirae; D_3__Leptospirales; D_4__Leptospiraceae; D_5__Turneriella; Ambiguous_taxa											0	0	0	0	0	0	0.04559	0	0
497	0	0	0	0	0	0	13	0	0	D_0__Bacteria; D_1__Proteobacteria; D_2__Alphaproteobacteria; D_3__Sphingomonadales; D_4__Sphingomonadaceae; D_5__Sphingomonas											0	0	0	0	0	0	0.04559	0	0
500	0	0	0	0	0	0	13	0	0	D_0__Bacteria; D_1__Actinobacteria; D_2__Actinobacteria; D_3__Propionibacteriales; D_4__Nocardioidaceae; D_5__Nocardioides											0	0	0	0	0	0	0.04559	0	0
542	0	0	0	0	0	0	13	0	0	D_0__Archaea; D_1__Nanoarchaeaeota; D_2__Woesearchaeia											0	0	0	0	0	0	0.04559	0	0
2141	0	0	0	0	0	0	13	0	0	D_0__Bacteria; D_1__Proteobacteria; D_2__Gammaproteobacteria; D_3__Pseudomonadales; D_4__Moraxellaceae; D_5__Acinetobacter											0	0	0	0	0	0	0.04559	0	0
3059	0	0	0	0	0	0	13	0	0	D_0__Bacteria											0	0	0	0	0	0	0.04559	0	0
3767	0	0	0	0	0	0	13	0	0	D_0__Bacteria; D_1__Proteobacteria; D_2__Alphaproteobacteria; D_3__Sphingomonadales; D_4__Sphingomonadaceae											0	0	0	0	0	0	0.04559	0	0
3911	0	0	0	0	0	0	13	0	0	D_0__Bacteria; D_1__Proteobacteria; D_2__Gammaproteobacteria; D_3__Betaproteobacteriales; D_4__Gallionellaceae											0	0	0	0	0	0	0.04559	0	0
4596	0	0	0	0	0	0	13	0	0	D_0__Bacteria; D_1__Proteobacteria; D_2__Alphaproteobacteria; D_3__Rhodobacterales; D_4__Rhodobacteraceae											0	0	0	0	0	0	0.04559	0	0
4773	0	0	0	0	0	0	13	0	0	D_0__Bacteria; D_1__Actinobacteria; D_2__Actinobacteria; D_3__Micrococcales; D_4__Intrasporangiaceae											0	0	0	0	0	0	0.04559	0	0
6331	0	0	0	0	0	0	13	0	0	D_0__Bacteria; D_1__Proteobacteria; D_2__Gammaproteobacteria; D_3__Pseudomonadales; D_4__Moraxellaceae; D_5__Acinetobacter											0	0	0	0	0	0	0.04559	0	0
6452	0	0	0	0	0	0	13	0	0	D_0__Bacteria; D_1__Proteobacteria; D_2__Gammaproteobacteria; D_3__Betaproteobacteriales; D_4__Gallionellaceae											0	0	0	0	0	0	0.04559	0	0
6672	0	0	0	0	0	0	13	0	0	D_0__Bacteria; D_1__Proteobacteria; D_2__Gammaproteobacteria; D_3__Pseudomonadales; D_4__Moraxellaceae; D_5__Acinetobacter											0	0	0	0	0	0	0.04559	0	0
8623	0	0	0	0	0	0	13	0	0	D_0__Bacteria; D_1__Proteobacteria; D_2__Gammaproteobacteria											0	0	0	0	0	0	0.04559	0	0
9192	0	0	0	0	0	0	13	0	0	D_0__Bacteria; D_1__Proteobacteria; D_2__Alphaproteobacteria; D_3__Rhizobiales; D_4__Beijerinckiaceae											0	0	0	0	0	0	0.04559	0	0
9814	0	0	0	0	0	0	13	0	0	D_0__Bacteria; D_1__Proteobacteria; D_2__Gammaproteobacteria; D_3__Pseudomonadales; D_4__Moraxellaceae; D_5__Alkanindiges; Ambiguous_taxa											0	0	0	0	0	0	0.04559	0	0
10076	0	0	0	0	0	0	13	0	0	D_0__Bacteria; D_1__Proteobacteria; D_2__Gammaproteobacteria; D_3__Betaproteobacteriales; D_4__Gallionellaceae											0	0	0	0	0	0	0.04559	0	0
10631	0	0	0	0	0	0	13	0	0	D_0__Bacteria; D_1__Proteobacteria; D_2__Gammaproteobacteria; D_3__Betaproteobacteriales; D_4__Gallionellaceae; D_5__Sideroxydans; Ambiguous_taxa											0	0	0	0	0	0	0.04559	0	0
5065	0	0	0	0	0	1	12	0	0	D_0__Bacteria; D_1__Proteobacteria; D_2__Alphaproteobacteria; D_3__Caulobacterales; D_4__Caulobacteraceae; D_5__Brevundimonas						MIX					0	0	0	0	0	0.00350693	0.0420831	0	0
789	0	2	0	0	0	0	12	0	0	D_0__Bacteria; D_1__Proteobacteria; D_2__Gammaproteobacteria; D_3__Betaproteobacteriales; D_4__Rhodocyclaceae		NT									0	0.00701385	0	0	0	0	0.0420831	0	0
5110	0	1	0	0	0	0	12	0	0	D_0__Bacteria; D_1__Proteobacteria; D_2__Gammaproteobacteria; D_3__Betaproteobacteriales		NT									0	0.00350693	0	0	0	0	0.0420831	0	0
359	0	0	0	0	0	0	12	0	0	D_0__Archaea; D_1__Nanoarchaeaeota; D_2__Woesearchaeia											0	0	0	0	0	0	0.0420831	0	0
380	0	0	0	0	0	0	12	0	0	D_0__Bacteria; D_1__Patescibacteria; D_2__Gracilibacteria											0	0	0	0	0	0	0.0420831	0	0
444	0	0	0	0	0	0	12	0	0	D_0__Bacteria; D_1__Omnitrophicaeota											0	0	0	0	0	0	0.0420831	0	0
514	0	0	0	0	0	0	12	0	0	D_0__Bacteria; D_1__Acidobacteria; D_2__Blastocatellia (Subgroup 4); D_3__Blastocatellales; D_4__Blastocatellaceae; D_5__Blastocatella											0	0	0	0	0	0	0.0420831	0	0
535	0	0	0	0	0	0	12	0	0	D_0__Bacteria; D_1__Omnitrophicaeota											0	0	0	0	0	0	0.0420831	0	0
545	0	0	0	0	0	0	12	0	0	D_0__Bacteria											0	0	0	0	0	0	0.0420831	0	0
599	0	0	0	0	0	0	12	0	0	D_0__Bacteria; D_1__Patescibacteria; D_2__ABY1; D_3__Candidatus Kuenenbacteria; D_4__Parcubacteria bacterium SCGC AAA011-N16; D_5__Parcubacteria bacterium SCGC AAA011-N16; D_6__Parcubacteria bacterium SCGC AAA011-N16											0	0	0	0	0	0	0.0420831	0	0
601	0	0	0	0	0	0	12	0	0	D_0__Bacteria; D_1__Bacteroidetes; D_2__Ignavibacteria; D_3__Ignavibacteriales; D_4__SM1H02; D_5__uncultured bacterium; D_6__uncultured bacterium											0	0	0	0	0	0	0.0420831	0	0
762	0	0	0	0	0	0	12	0	0	D_0__Bacteria; D_1__Proteobacteria; D_2__Gammaproteobacteria; D_3__Pseudomonadales; D_4__Moraxellaceae; D_5__Acinetobacter											0	0	0	0	0	0	0.0420831	0	0
802	0	0	0	0	0	0	12	0	0	D_0__Bacteria; D_1__Actinobacteria; D_2__Thermoleophilia; D_3__Gaiellales											0	0	0	0	0	0	0.0420831	0	0
886	0	0	0	0	0	0	12	0	0	D_0__Bacteria; D_1__Proteobacteria; D_2__Gammaproteobacteria; D_3__Betaproteobacteriales; D_4__Gallionellaceae											0	0	0	0	0	0	0.0420831	0	0
1398	0	0	0	0	0	0	12	0	0	D_0__Bacteria											0	0	0	0	0	0	0.0420831	0	0
1999	0	0	0	0	0	0	12	0	0	D_0__Bacteria; D_1__Deinococcus-Thermus; D_2__Deinococci; D_3__Deinococcales; D_4__Deinococcaceae; D_5__Deinococcus											0	0	0	0	0	0	0.0420831	0	0
3976	0	0	0	0	0	0	12	0	0	D_0__Bacteria; D_1__Omnitrophicaeota; D_2__uncultured bacterium; D_3__uncultured bacterium; D_4__uncultured bacterium; D_5__uncultured bacterium; D_6__uncultured bacterium											0	0	0	0	0	0	0.0420831	0	0
3997	0	0	0	0	0	0	12	0	0	D_0__Bacteria; D_1__Actinobacteria; D_2__Actinobacteria; D_3__Micrococcales; D_4__Intrasporangiaceae											0	0	0	0	0	0	0.0420831	0	0
4184	0	0	0	0	0	0	12	0	0	D_0__Bacteria; D_1__Proteobacteria; D_2__Gammaproteobacteria; D_3__Betaproteobacteriales; D_4__Gallionellaceae											0	0	0	0	0	0	0.0420831	0	0
4235	0	0	0	0	0	0	12	0	0	D_0__Bacteria; D_1__Proteobacteria; D_2__Gammaproteobacteria; D_3__Betaproteobacteriales											0	0	0	0	0	0	0.0420831	0	0
4928	0	0	0	0	0	0	12	0	0	D_0__Bacteria; D_1__Deinococcus-Thermus; D_2__Deinococci; D_3__Deinococcales; D_4__Deinococcaceae; D_5__Deinococcus; Ambiguous_taxa											0	0	0	0	0	0	0.0420831	0	0
6119	0	0	0	0	0	0	12	0	0	D_0__Bacteria; D_1__Nitrospirae; D_2__Nitrospira; D_3__Nitrospirales; D_4__Nitrospiraceae; D_5__Nitrospira											0	0	0	0	0	0	0.0420831	0	0
6185	0	0	0	0	0	0	12	0	0	D_0__Bacteria; D_1__Proteobacteria; D_2__Gammaproteobacteria; D_3__Pseudomonadales; D_4__Moraxellaceae; D_5__Acinetobacter											0	0	0	0	0	0	0.0420831	0	0
6507	0	0	0	0	0	0	12	0	0	D_0__Bacteria; D_1__Proteobacteria; D_2__Gammaproteobacteria; D_3__Betaproteobacteriales; D_4__Gallionellaceae											0	0	0	0	0	0	0.0420831	0	0
6726	0	0	0	0	0	0	12	0	0	D_0__Bacteria; D_1__Proteobacteria; D_2__Gammaproteobacteria; D_3__Betaproteobacteriales; D_4__Gallionellaceae											0	0	0	0	0	0	0.0420831	0	0
6816	0	0	0	0	0	0	12	0	0	D_0__Bacteria; D_1__Proteobacteria; D_2__Gammaproteobacteria; D_3__Betaproteobacteriales; D_4__Gallionellaceae											0	0	0	0	0	0	0.0420831	0	0
6978	0	0	0	0	0	0	12	0	0	D_0__Bacteria; D_1__Proteobacteria; D_2__Gammaproteobacteria; D_3__Pseudomonadales; D_4__Moraxellaceae; D_5__Acinetobacter											0	0	0	0	0	0	0.0420831	0	0
8717	0	0	0	0	0	0	12	0	0	D_0__Bacteria; D_1__Proteobacteria; D_2__Gammaproteobacteria; D_3__Betaproteobacteriales; D_4__Rhodocyclaceae											0	0	0	0	0	0	0.0420831	0	0
9512	0	0	0	0	0	0	12	0	0	D_0__Bacteria; D_1__Proteobacteria; D_2__Gammaproteobacteria; D_3__Betaproteobacteriales; D_4__Gallionellaceae											0	0	0	0	0	0	0.0420831	0	0
9544	0	0	0	0	0	0	12	0	0	D_0__Bacteria; D_1__Proteobacteria; D_2__Gammaproteobacteria; D_3__Betaproteobacteriales; D_4__Gallionellaceae											0	0	0	0	0	0	0.0420831	0	0
9921	0	0	0	0	0	0	12	0	0	D_0__Bacteria; D_1__Proteobacteria; D_2__Gammaproteobacteria; D_3__Pseudomonadales; D_4__Moraxellaceae; D_5__Acinetobacter											0	0	0	0	0	0	0.0420831	0	0
10284	0	0	0	0	0	0	12	0	0	D_0__Bacteria; D_1__Omnitrophicaeota											0	0	0	0	0	0	0.0420831	0	0
3676	0	0	0	0	0	2	11	0	0	D_0__Bacteria; D_1__Proteobacteria; D_2__Alphaproteobacteria						MIX					0	0	0	0	0	0.00701385	0.0385762	0	0
4937	0	0	12	0	0	0	11	0	0	D_0__Bacteria; D_1__Actinobacteria; D_2__Actinobacteria; D_3__Propionibacteriales; D_4__Nocardioidaceae			FE								0	0	0.0420831	0	0	0	0.0385762	0	0
435	0	0	0	0	0	0	11	0	0	D_0__Bacteria; D_1__Proteobacteria; D_2__Deltaproteobacteria; D_3__NKB15											0	0	0	0	0	0	0.0385762	0	0
492	0	0	0	0	0	0	11	0	0	D_0__Bacteria; D_1__Proteobacteria; D_2__Gammaproteobacteria; D_3__Betaproteobacteriales											0	0	0	0	0	0	0.0385762	0	0
502	0	0	0	0	0	0	11	0	0	D_0__Bacteria; D_1__Bacteroidetes; D_2__Bacteroidia; D_3__Chitinophagales; D_4__Saprospiraceae; D_5__uncultured											0	0	0	0	0	0	0.0385762	0	0
536	0	0	0	0	0	0	11	0	0	D_0__Bacteria; D_1__Omnitrophicaeota											0	0	0	0	0	0	0.0385762	0	0
616	0	0	0	0	0	0	11	0	0	D_0__Archaea; D_1__Nanoarchaeaeota; D_2__Nanohaloarchaeia; D_3__Aenigmarchaeales; D_4__uncultured archaeon; D_5__uncultured archaeon; D_6__uncultured archaeon											0	0	0	0	0	0	0.0385762	0	0
811	0	0	0	0	0	0	11	0	0	D_0__Bacteria; D_1__Proteobacteria; D_2__Alphaproteobacteria; D_3__Sphingomonadales; D_4__Sphingomonadaceae											0	0	0	0	0	0	0.0385762	0	0
822	0	0	0	0	0	0	11	0	0	D_0__Archaea; D_1__Euryarchaeota; D_2__Methanomicrobia; D_3__Methanosarcinales; D_4__Methanoperedenaceae											0	0	0	0	0	0	0.0385762	0	0
932	0	0	0	0	0	0	11	0	0	D_0__Bacteria; D_1__Proteobacteria; D_2__Gammaproteobacteria; D_3__Pseudomonadales; D_4__Moraxellaceae; D_5__Acinetobacter; D_6__Acinetobacter lwoffii											0	0	0	0	0	0	0.0385762	0	0
1278	0	0	0	0	0	0	11	0	0	D_0__Bacteria; D_1__Proteobacteria; D_2__Alphaproteobacteria; D_3__Caulobacterales; D_4__Caulobacteraceae; D_5__Brevundimonas											0	0	0	0	0	0	0.0385762	0	0
1299	0	0	0	0	0	0	11	0	0	D_0__Bacteria; D_1__Proteobacteria; D_2__Alphaproteobacteria; D_3__Caulobacterales; D_4__Caulobacteraceae; D_5__Brevundimonas											0	0	0	0	0	0	0.0385762	0	0
1891	0	0	0	0	0	0	11	0	0	D_0__Bacteria; D_1__Proteobacteria; D_2__Gammaproteobacteria; D_3__Pseudomonadales; D_4__Moraxellaceae; D_5__Acinetobacter											0	0	0	0	0	0	0.0385762	0	0
2800	0	0	0	0	0	0	11	0	0	D_0__Bacteria; D_1__Proteobacteria; D_2__Gammaproteobacteria; D_3__Pseudomonadales; D_4__Moraxellaceae; D_5__Acinetobacter											0	0	0	0	0	0	0.0385762	0	0
3786	0	0	0	0	0	0	11	0	0	D_0__Bacteria; D_1__Actinobacteria; D_2__Actinobacteria; D_3__Micrococcales											0	0	0	0	0	0	0.0385762	0	0
3846	0	0	0	0	0	0	11	0	0	D_0__Bacteria; D_1__Proteobacteria; D_2__Gammaproteobacteria; D_3__Betaproteobacteriales; D_4__Gallionellaceae											0	0	0	0	0	0	0.0385762	0	0
3858	0	0	0	0	0	0	11	0	0	D_0__Bacteria; D_1__Proteobacteria; D_2__Gammaproteobacteria; D_3__Betaproteobacteriales											0	0	0	0	0	0	0.0385762	0	0
3950	0	0	0	0	0	0	11	0	0	D_0__Bacteria; D_1__Deinococcus-Thermus; D_2__Deinococci; D_3__Deinococcales; D_4__Deinococcaceae; D_5__Deinococcus											0	0	0	0	0	0	0.0385762	0	0
5512	0	0	0	0	0	0	11	0	0	D_0__Bacteria; D_1__Actinobacteria; D_2__Actinobacteria; D_3__Micrococcales; D_4__Intrasporangiaceae; D_5__Tetrasphaera											0	0	0	0	0	0	0.0385762	0	0
6551	0	0	0	0	0	0	11	0	0	D_0__Bacteria; D_1__Proteobacteria; D_2__Alphaproteobacteria; D_3__Caulobacterales; D_4__Caulobacteraceae; D_5__Brevundimonas; Ambiguous_taxa											0	0	0	0	0	0	0.0385762	0	0
7379	0	0	0	0	0	0	11	0	0	D_0__Bacteria; D_1__Proteobacteria; D_2__Alphaproteobacteria; D_3__Rhodobacterales; D_4__Rhodobacteraceae											0	0	0	0	0	0	0.0385762	0	0
7484	0	0	0	0	0	0	11	0	0	D_0__Bacteria; D_1__Proteobacteria; D_2__Gammaproteobacteria; D_3__Betaproteobacteriales											0	0	0	0	0	0	0.0385762	0	0
7802	0	0	0	0	0	0	11	0	0	D_0__Bacteria; D_1__Proteobacteria; D_2__Gammaproteobacteria; D_3__Pseudomonadales; D_4__Moraxellaceae; D_5__Acinetobacter											0	0	0	0	0	0	0.0385762	0	0
8212	0	0	0	0	0	0	11	0	0	D_0__Bacteria; D_1__Actinobacteria; D_2__Actinobacteria; D_3__Propionibacteriales; D_4__Nocardioidaceae; D_5__Nocardioides											0	0	0	0	0	0	0.0385762	0	0
8492	0	0	0	0	0	0	11	0	0	D_0__Bacteria; D_1__Proteobacteria; D_2__Gammaproteobacteria; D_3__Pseudomonadales; D_4__Moraxellaceae; D_5__Alkanindiges; Ambiguous_taxa											0	0	0	0	0	0	0.0385762	0	0
8518	0	0	0	0	0	0	11	0	0	D_0__Bacteria; D_1__Proteobacteria; D_2__Deltaproteobacteria; D_3__MBNT15; Ambiguous_taxa; Ambiguous_taxa; Ambiguous_taxa											0	0	0	0	0	0	0.0385762	0	0
9056	0	0	0	0	0	0	11	0	0	D_0__Bacteria; D_1__Proteobacteria; D_2__Gammaproteobacteria; D_3__Betaproteobacteriales; D_4__Gallionellaceae											0	0	0	0	0	0	0.0385762	0	0
9155	0	0	0	0	0	0	11	0	0	D_0__Bacteria; D_1__Proteobacteria; D_2__Gammaproteobacteria; D_3__Pseudomonadales; D_4__Moraxellaceae; D_5__Acinetobacter											0	0	0	0	0	0	0.0385762	0	0
9693	0	0	0	0	0	0	11	0	0	D_0__Bacteria; D_1__Proteobacteria; D_2__Gammaproteobacteria; D_3__Betaproteobacteriales; D_4__Gallionellaceae											0	0	0	0	0	0	0.0385762	0	0
10080	0	0	0	0	0	0	11	0	0	D_0__Bacteria; D_1__Proteobacteria; D_2__Gammaproteobacteria; D_3__Pseudomonadales; D_4__Moraxellaceae; D_5__Alkanindiges; Ambiguous_taxa											0	0	0	0	0	0	0.0385762	0	0
8767	0	0	1	0	0	0	10	0	0	D_0__Bacteria; D_1__Proteobacteria; D_2__Alphaproteobacteria; D_3__Caulobacterales; D_4__Caulobacteraceae; D_5__Brevundimonas			FE								0	0	0.00350693	0	0	0	0.0350693	0	0
4120	0	1	0	0	0	0	10	0	0	D_0__Bacteria; D_1__Rokubacteria; D_2__NC10; D_3__Rokubacteriales		NT									0	0.00350693	0	0	0	0	0.0350693	0	0
100	0	0	0	0	0	0	10	0	0	D_0__Bacteria; D_1__Proteobacteria; D_2__Gammaproteobacteria; D_3__Betaproteobacteriales; D_4__Gallionellaceae											0	0	0	0	0	0	0.0350693	0	0
338	0	0	0	0	0	0	10	0	0	D_0__Bacteria; D_1__Proteobacteria; D_2__Alphaproteobacteria; D_3__Caulobacterales; D_4__Caulobacteraceae; D_5__Brevundimonas											0	0	0	0	0	0	0.0350693	0	0
401	0	0	0	0	0	0	10	0	0	D_0__Bacteria; D_1__Actinobacteria; D_2__Actinobacteria; D_3__Micrococcales; D_4__Intrasporangiaceae											0	0	0	0	0	0	0.0350693	0	0
439	0	0	0	0	0	0	10	0	0	D_0__Bacteria; D_1__Deinococcus-Thermus; D_2__Deinococci; D_3__Deinococcales; D_4__Deinococcaceae; D_5__Deinococcus											0	0	0	0	0	0	0.0350693	0	0
520	0	0	0	0	0	0	10	0	0	D_0__Bacteria; D_1__Proteobacteria; D_2__Gammaproteobacteria											0	0	0	0	0	0	0.0350693	0	0
547	0	0	0	0	0	0	10	0	0	D_0__Bacteria; D_1__Proteobacteria; D_2__Alphaproteobacteria; D_3__Acetobacterales; D_4__Acetobacteraceae; D_5__Craurococcus											0	0	0	0	0	0	0.0350693	0	0
574	0	0	0	0	0	0	10	0	0	D_0__Bacteria; D_1__Proteobacteria; D_2__Alphaproteobacteria											0	0	0	0	0	0	0.0350693	0	0
576	0	0	0	0	0	0	10	0	0	D_0__Bacteria; D_1__Actinobacteria; D_2__Actinobacteria; D_3__Micrococcales; D_4__Intrasporangiaceae											0	0	0	0	0	0	0.0350693	0	0
648	0	0	0	0	0	0	10	0	0	D_0__Bacteria											0	0	0	0	0	0	0.0350693	0	0
655	0	0	0	0	0	0	10	0	0	D_0__Bacteria											0	0	0	0	0	0	0.0350693	0	0
697	0	0	0	0	0	0	10	0	0	D_0__Bacteria; D_1__Proteobacteria; D_2__Alphaproteobacteria; D_3__Sphingomonadales; D_4__Sphingomonadaceae											0	0	0	0	0	0	0.0350693	0	0
739	0	0	0	0	0	0	10	0	0	D_0__Bacteria; D_1__Omnitrophicaeota											0	0	0	0	0	0	0.0350693	0	0
773	0	0	0	0	0	0	10	0	0	D_0__Bacteria; D_1__Proteobacteria; D_2__Gammaproteobacteria; D_3__Betaproteobacteriales											0	0	0	0	0	0	0.0350693	0	0
784	0	0	0	0	0	0	10	0	0	D_0__Bacteria; D_1__Cyanobacteria; D_2__Oxyphotobacteria; D_3__Nostocales; D_4__Chroococcidiopsaceae; D_5__Chroococcidiopsis PCC 7203; Ambiguous_taxa											0	0	0	0	0	0	0.0350693	0	0
799	0	0	0	0	0	0	10	0	0	D_0__Bacteria; D_1__Latescibacteria											0	0	0	0	0	0	0.0350693	0	0
833	0	0	0	0	0	0	10	0	0	D_0__Bacteria; D_1__Actinobacteria											0	0	0	0	0	0	0.0350693	0	0
877	0	0	0	0	0	0	10	0	0	D_0__Bacteria; D_1__Chloroflexi; D_2__Anaerolineae; D_3__RBG-13-54-9; D_4__uncultured prokaryote; D_5__uncultured prokaryote; D_6__uncultured prokaryote											0	0	0	0	0	0	0.0350693	0	0
915	0	0	0	0	0	0	10	0	0	D_0__Bacteria											0	0	0	0	0	0	0.0350693	0	0
992	0	0	0	0	0	0	10	0	0	D_0__Bacteria; D_1__Omnitrophicaeota											0	0	0	0	0	0	0.0350693	0	0
1130	0	0	0	0	0	0	10	0	0	D_0__Archaea; D_1__Euryarchaeota; D_2__Methanomicrobia; D_3__Methanosarcinales; D_4__Methanoperedenaceae; D_5__Candidatus Methanoperedens											0	0	0	0	0	0	0.0350693	0	0
1254	0	0	0	0	0	0	10	0	0	D_0__Bacteria											0	0	0	0	0	0	0.0350693	0	0
1292	0	0	0	0	0	0	10	0	0	D_0__Bacteria; D_1__Proteobacteria; D_2__Alphaproteobacteria; D_3__Sphingomonadales; D_4__Sphingomonadaceae											0	0	0	0	0	0	0.0350693	0	0
1301	0	0	0	0	0	0	10	0	0	D_0__Bacteria; D_1__Proteobacteria; D_2__Deltaproteobacteria; D_3__Syntrophobacterales; D_4__Syntrophaceae											0	0	0	0	0	0	0.0350693	0	0
1676	0	0	0	0	0	0	10	0	0	D_0__Bacteria; D_1__Proteobacteria; D_2__Deltaproteobacteria; D_3__Myxococcales											0	0	0	0	0	0	0.0350693	0	0
1739	0	0	0	0	0	0	10	0	0	D_0__Bacteria; D_1__Proteobacteria; D_2__Gammaproteobacteria; D_3__Betaproteobacteriales											0	0	0	0	0	0	0.0350693	0	0
2452	0	0	0	0	0	0	10	0	0	D_0__Bacteria; D_1__Proteobacteria; D_2__Gammaproteobacteria; D_3__Pseudomonadales; D_4__Moraxellaceae; D_5__Acinetobacter											0	0	0	0	0	0	0.0350693	0	0
2626	0	0	0	0	0	0	10	0	0	D_0__Bacteria; D_1__Proteobacteria; D_2__Gammaproteobacteria; D_3__Pseudomonadales; D_4__Moraxellaceae; D_5__Acinetobacter											0	0	0	0	0	0	0.0350693	0	0
3295	0	0	0	0	0	0	10	0	0	D_0__Bacteria; D_1__Proteobacteria; D_2__Gammaproteobacteria; D_3__Pseudomonadales; D_4__Moraxellaceae; D_5__Acinetobacter											0	0	0	0	0	0	0.0350693	0	0
3306	0	0	0	0	0	0	10	0	0	D_0__Bacteria; D_1__Proteobacteria; D_2__Gammaproteobacteria; D_3__Pseudomonadales; D_4__Moraxellaceae; D_5__Acinetobacter											0	0	0	0	0	0	0.0350693	0	0
4252	0	0	0	0	0	0	10	0	0	D_0__Bacteria; D_1__Proteobacteria; D_2__Gammaproteobacteria											0	0	0	0	0	0	0.0350693	0	0
4679	0	0	0	0	0	0	10	0	0	D_0__Bacteria; D_1__Proteobacteria; D_2__Gammaproteobacteria; D_3__Betaproteobacteriales; D_4__Burkholderiaceae											0	0	0	0	0	0	0.0350693	0	0
4718	0	0	0	0	0	0	10	0	0	D_0__Bacteria; D_1__Actinobacteria; D_2__Actinobacteria; D_3__Micrococcales; D_4__Intrasporangiaceae											0	0	0	0	0	0	0.0350693	0	0
5070	0	0	0	0	0	0	10	0	0	D_0__Bacteria; D_1__Proteobacteria; D_2__Gammaproteobacteria; D_3__Betaproteobacteriales; D_4__Gallionellaceae											0	0	0	0	0	0	0.0350693	0	0
5539	0	0	0	0	0	0	10	0	0	D_0__Bacteria; D_1__Proteobacteria; D_2__Gammaproteobacteria; D_3__Pseudomonadales; D_4__Moraxellaceae; D_5__Acinetobacter											0	0	0	0	0	0	0.0350693	0	0
5836	0	0	0	0	0	0	10	0	0	D_0__Bacteria; D_1__Actinobacteria; D_2__Actinobacteria; D_3__Micrococcales											0	0	0	0	0	0	0.0350693	0	0
6265	0	0	0	0	0	0	10	0	0	D_0__Bacteria; D_1__Proteobacteria; D_2__Gammaproteobacteria; D_3__Betaproteobacteriales; D_4__Gallionellaceae											0	0	0	0	0	0	0.0350693	0	0
6287	0	0	0	0	0	0	10	0	0	D_0__Bacteria; D_1__Proteobacteria; D_2__Gammaproteobacteria; D_3__Pseudomonadales; D_4__Moraxellaceae; D_5__Acinetobacter											0	0	0	0	0	0	0.0350693	0	0
6739	0	0	0	0	0	0	10	0	0	D_0__Bacteria; D_1__Proteobacteria; D_2__Gammaproteobacteria; D_3__Pseudomonadales; D_4__Moraxellaceae; D_5__Acinetobacter											0	0	0	0	0	0	0.0350693	0	0
6896	0	0	0	0	0	0	10	0	0	D_0__Bacteria; D_1__Proteobacteria; D_2__Gammaproteobacteria; D_3__Betaproteobacteriales; D_4__Gallionellaceae											0	0	0	0	0	0	0.0350693	0	0
7064	0	0	0	0	0	0	10	0	0	D_0__Bacteria; D_1__Proteobacteria; D_2__Gammaproteobacteria; D_3__Pseudomonadales; D_4__Moraxellaceae; D_5__Acinetobacter											0	0	0	0	0	0	0.0350693	0	0
8665	0	0	0	0	0	0	10	0	0	D_0__Bacteria; D_1__Proteobacteria; D_2__Gammaproteobacteria; D_3__Pseudomonadales; D_4__Moraxellaceae; D_5__Acinetobacter											0	0	0	0	0	0	0.0350693	0	0
8965	0	0	0	0	0	0	10	0	0	D_0__Bacteria; D_1__Proteobacteria; D_2__Gammaproteobacteria; D_3__Pseudomonadales; D_4__Moraxellaceae; D_5__Acinetobacter											0	0	0	0	0	0	0.0350693	0	0
9072	0	0	0	0	0	0	10	0	0	D_0__Bacteria; D_1__Proteobacteria; D_2__Gammaproteobacteria; D_3__Betaproteobacteriales; D_4__Gallionellaceae											0	0	0	0	0	0	0.0350693	0	0
9388	0	0	0	0	0	0	10	0	0	D_0__Bacteria; D_1__Actinobacteria; D_2__Actinobacteria											0	0	0	0	0	0	0.0350693	0	0
9550	0	0	0	0	0	0	10	0	0	D_0__Bacteria; D_1__Proteobacteria; D_2__Gammaproteobacteria; D_3__Betaproteobacteriales; D_4__Burkholderiaceae; D_5__Delftia											0	0	0	0	0	0	0.0350693	0	0
9874	0	0	0	0	0	0	10	0	0	D_0__Bacteria; D_1__Proteobacteria; D_2__Gammaproteobacteria; D_3__Pseudomonadales; D_4__Moraxellaceae; D_5__Acinetobacter											0	0	0	0	0	0	0.0350693	0	0
9959	0	0	0	0	0	0	10	0	0	D_0__Bacteria; D_1__Proteobacteria; D_2__Gammaproteobacteria											0	0	0	0	0	0	0.0350693	0	0
7144	0	0	0	0	0	8	9	0	0	D_0__Bacteria; D_1__Proteobacteria; D_2__Alphaproteobacteria; D_3__Caulobacterales; D_4__Caulobacteraceae; D_5__Brevundimonas						MIX					0	0	0	0	0	0.0280554	0.0315623	0	0
1192	0	0	0	0	0	1	9	0	0	D_0__Bacteria; D_1__Proteobacteria; D_2__Alphaproteobacteria; D_3__Caulobacterales; D_4__Caulobacteraceae; D_5__Brevundimonas						MIX					0	0	0	0	0	0.00350693	0.0315623	0	0
645	0	0	0	0	3	0	9	0	0	D_0__Bacteria; D_1__Proteobacteria; D_2__Alphaproteobacteria; D_3__Caulobacterales; D_4__Hyphomonadaceae; D_5__SWB02; Ambiguous_taxa					BIC						0	0	0	0	0.0105208	0	0.0315623	0	0
1875	0	0	0	0	1	0	9	0	0	D_0__Bacteria; D_1__Proteobacteria; D_2__Gammaproteobacteria; D_3__Betaproteobacteriales; D_4__Burkholderiaceae					BIC						0	0	0	0	0.00350693	0	0.0315623	0	0
464	0	0	0	0	0	0	9	0	0	D_0__Bacteria; D_1__Actinobacteria; D_2__Actinobacteria; D_3__Micrococcales; D_4__Intrasporangiaceae											0	0	0	0	0	0	0.0315623	0	0
515	0	0	0	0	0	0	9	0	0	D_0__Bacteria; D_1__Proteobacteria; D_2__Deltaproteobacteria											0	0	0	0	0	0	0.0315623	0	0
578	0	0	0	0	0	0	9	0	0	D_0__Bacteria											0	0	0	0	0	0	0.0315623	0	0
649	0	0	0	0	0	0	9	0	0	D_0__Bacteria; D_1__Omnitrophicaeota											0	0	0	0	0	0	0.0315623	0	0
695	0	0	0	0	0	0	9	0	0	D_0__Bacteria; D_1__Proteobacteria; D_2__Gammaproteobacteria; D_3__Pseudomonadales; D_4__Moraxellaceae; D_5__Acinetobacter; D_6__Acinetobacter johnsonii											0	0	0	0	0	0	0.0315623	0	0
780	0	0	0	0	0	0	9	0	0	D_0__Bacteria; D_1__Latescibacteria											0	0	0	0	0	0	0.0315623	0	0
797	0	0	0	0	0	0	9	0	0	D_0__Bacteria; D_1__Proteobacteria; D_2__Alphaproteobacteria; D_3__Acetobacterales; D_4__Acetobacteraceae; D_5__Craurococcus; Ambiguous_taxa											0	0	0	0	0	0	0.0315623	0	0
845	0	0	0	0	0	0	9	0	0	D_0__Bacteria; D_1__Proteobacteria; D_2__Alphaproteobacteria; D_3__Sphingomonadales; D_4__Sphingomonadaceae											0	0	0	0	0	0	0.0315623	0	0
1102	0	0	0	0	0	0	9	0	0	D_0__Bacteria; D_1__Omnitrophicaeota											0	0	0	0	0	0	0.0315623	0	0
1264	0	0	0	0	0	0	9	0	0	D_0__Bacteria; D_1__Proteobacteria; D_2__Gammaproteobacteria; D_3__Betaproteobacteriales; D_4__Gallionellaceae											0	0	0	0	0	0	0.0315623	0	0
1626	0	0	0	0	0	0	9	0	0	D_0__Bacteria; D_1__Proteobacteria; D_2__Gammaproteobacteria											0	0	0	0	0	0	0.0315623	0	0
1659	0	0	0	0	0	0	9	0	0	D_0__Bacteria; D_1__Proteobacteria; D_2__Gammaproteobacteria; D_3__Pseudomonadales; D_4__Moraxellaceae; D_5__Alkanindiges; Ambiguous_taxa											0	0	0	0	0	0	0.0315623	0	0
3077	0	0	0	0	0	0	9	0	0	D_0__Bacteria											0	0	0	0	0	0	0.0315623	0	0
3127	0	0	0	0	0	0	9	0	0	D_0__Bacteria; D_1__Proteobacteria; D_2__Gammaproteobacteria; D_3__Betaproteobacteriales; D_4__Gallionellaceae											0	0	0	0	0	0	0.0315623	0	0
3216	0	0	0	0	0	0	9	0	0	D_0__Bacteria; D_1__Proteobacteria; D_2__Gammaproteobacteria; D_3__Betaproteobacteriales; D_4__Gallionellaceae											0	0	0	0	0	0	0.0315623	0	0
3725	0	0	0	0	0	0	9	0	0	D_0__Bacteria; D_1__Deinococcus-Thermus; D_2__Deinococci; D_3__Deinococcales; D_4__Deinococcaceae; D_5__Deinococcus											0	0	0	0	0	0	0.0315623	0	0
3748	0	0	0	0	0	0	9	0	0	D_0__Bacteria; D_1__Proteobacteria; D_2__Gammaproteobacteria											0	0	0	0	0	0	0.0315623	0	0
3784	0	0	0	0	0	0	9	0	0	D_0__Bacteria; D_1__Proteobacteria; D_2__Gammaproteobacteria; D_3__Pseudomonadales; D_4__Moraxellaceae; D_5__Acinetobacter; Ambiguous_taxa											0	0	0	0	0	0	0.0315623	0	0
3818	0	0	0	0	0	0	9	0	0	D_0__Bacteria; D_1__Omnitrophicaeota; D_2__uncultured bacterium; D_3__uncultured bacterium; D_4__uncultured bacterium; D_5__uncultured bacterium; D_6__uncultured bacterium											0	0	0	0	0	0	0.0315623	0	0
4683	0	0	0	0	0	0	9	0	0	D_0__Bacteria; D_1__Deinococcus-Thermus; D_2__Deinococci; D_3__Deinococcales; D_4__Deinococcaceae; D_5__Deinococcus											0	0	0	0	0	0	0.0315623	0	0
5057	0	0	0	0	0	0	9	0	0	D_0__Bacteria; D_1__Proteobacteria; D_2__Alphaproteobacteria; D_3__Caulobacterales; D_4__Caulobacteraceae; D_5__Brevundimonas											0	0	0	0	0	0	0.0315623	0	0
5532	0	0	0	0	0	0	9	0	0	D_0__Bacteria; D_1__Proteobacteria; D_2__Alphaproteobacteria; D_3__Sphingomonadales; D_4__Sphingomonadaceae											0	0	0	0	0	0	0.0315623	0	0
6042	0	0	0	0	0	0	9	0	0	D_0__Bacteria; D_1__Proteobacteria; D_2__Gammaproteobacteria; D_3__Pseudomonadales; D_4__Moraxellaceae; D_5__Acinetobacter											0	0	0	0	0	0	0.0315623	0	0
6149	0	0	0	0	0	0	9	0	0	D_0__Bacteria; D_1__Nitrospirae; D_2__Nitrospira; D_3__Nitrospirales; D_4__Nitrospiraceae; D_5__Nitrospira											0	0	0	0	0	0	0.0315623	0	0
6186	0	0	0	0	0	0	9	0	0	D_0__Bacteria; D_1__Proteobacteria; D_2__Gammaproteobacteria; D_3__Betaproteobacteriales; D_4__Gallionellaceae											0	0	0	0	0	0	0.0315623	0	0
6351	0	0	0	0	0	0	9	0	0	D_0__Bacteria; D_1__Proteobacteria; D_2__Gammaproteobacteria; D_3__Pseudomonadales; D_4__Moraxellaceae; D_5__Acinetobacter											0	0	0	0	0	0	0.0315623	0	0
6421	0	0	0	0	0	0	9	0	0	D_0__Bacteria; D_1__Proteobacteria; D_2__Gammaproteobacteria; D_3__Pseudomonadales; D_4__Moraxellaceae; D_5__Acinetobacter											0	0	0	0	0	0	0.0315623	0	0
8039	0	0	0	0	0	0	9	0	0	D_0__Bacteria; D_1__Proteobacteria; D_2__Gammaproteobacteria; D_3__Betaproteobacteriales; D_4__Gallionellaceae											0	0	0	0	0	0	0.0315623	0	0
8432	0	0	0	0	0	0	9	0	0	D_0__Bacteria; D_1__Proteobacteria; D_2__Alphaproteobacteria; D_3__Rhodobacterales; D_4__Rhodobacteraceae											0	0	0	0	0	0	0.0315623	0	0
8644	0	0	0	0	0	0	9	0	0	D_0__Bacteria; D_1__Proteobacteria; D_2__Gammaproteobacteria; D_3__Pseudomonadales; D_4__Moraxellaceae; D_5__Acinetobacter											0	0	0	0	0	0	0.0315623	0	0
8659	0	0	0	0	0	0	9	0	0	D_0__Bacteria; D_1__Actinobacteria; D_2__Actinobacteria; D_3__Micrococcales; D_4__Intrasporangiaceae; D_5__Tetrasphaera; Ambiguous_taxa											0	0	0	0	0	0	0.0315623	0	0
8690	0	0	0	0	0	0	9	0	0	D_0__Bacteria; D_1__Proteobacteria; D_2__Gammaproteobacteria; D_3__Pseudomonadales; D_4__Moraxellaceae; D_5__Acinetobacter											0	0	0	0	0	0	0.0315623	0	0
9498	0	0	0	0	0	0	9	0	0	D_0__Bacteria; D_1__Proteobacteria; D_2__Gammaproteobacteria											0	0	0	0	0	0	0.0315623	0	0
10084	0	0	0	0	0	0	9	0	0	D_0__Archaea; D_1__Crenarchaeota; D_2__Bathyarchaeia; D_3__uncultured crenarchaeote; D_4__uncultured crenarchaeote; D_5__uncultured crenarchaeote; D_6__uncultured crenarchaeote											0	0	0	0	0	0	0.0315623	0	0
10659	0	0	0	0	0	0	9	0	0	D_0__Bacteria; D_1__Nitrospirae; D_2__Nitrospira; D_3__Nitrospirales; D_4__Nitrospiraceae; D_5__Nitrospira											0	0	0	0	0	0	0.0315623	0	0
1436	0	0	1	0	0	0	8	0	0	D_0__Bacteria; D_1__Proteobacteria; D_2__Gammaproteobacteria; D_3__Betaproteobacteriales			FE								0	0	0.00350693	0	0	0	0.0280554	0	0
805	0	1	0	0	0	0	8	0	0	D_0__Bacteria; D_1__Omnitrophicaeota		NT									0	0.00350693	0	0	0	0	0.0280554	0	0
6214	0	1	0	0	0	0	8	0	0	D_0__Bacteria; D_1__Proteobacteria; D_2__Gammaproteobacteria; D_3__Betaproteobacteriales; D_4__Rhodocyclaceae		NT									0	0.00350693	0	0	0	0	0.0280554	0	0
426	0	0	0	0	0	0	8	0	0	D_0__Bacteria; D_1__Proteobacteria; D_2__Alphaproteobacteria; D_3__Rhizobiales; D_4__Beijerinckiaceae											0	0	0	0	0	0	0.0280554	0	0
450	0	0	0	0	0	0	8	0	0	D_0__Bacteria; D_1__Omnitrophicaeota											0	0	0	0	0	0	0.0280554	0	0
467	0	0	0	0	0	0	8	0	0	D_0__Bacteria											0	0	0	0	0	0	0.0280554	0	0
507	0	0	0	0	0	0	8	0	0	D_0__Bacteria											0	0	0	0	0	0	0.0280554	0	0
509	0	0	0	0	0	0	8	0	0	D_0__Bacteria; D_1__Rokubacteria; D_2__NC10; D_3__Methylomirabilales; D_4__Methylomirabilaceae; D_5__Sh765B-TzT-35											0	0	0	0	0	0	0.0280554	0	0
611	0	0	0	0	0	0	8	0	0	D_0__Bacteria; D_1__Proteobacteria; D_2__Alphaproteobacteria											0	0	0	0	0	0	0.0280554	0	0
615	0	0	0	0	0	0	8	0	0	D_0__Bacteria											0	0	0	0	0	0	0.0280554	0	0
642	0	0	0	0	0	0	8	0	0	D_0__Bacteria; D_1__Nitrospinae; D_2__MT5B39											0	0	0	0	0	0	0.0280554	0	0
673	0	0	0	0	0	0	8	0	0	D_0__Bacteria; D_1__Actinobacteria											0	0	0	0	0	0	0.0280554	0	0
686	0	0	0	0	0	0	8	0	0	D_0__Bacteria; D_1__Omnitrophicaeota											0	0	0	0	0	0	0.0280554	0	0
714	0	0	0	0	0	0	8	0	0	D_0__Bacteria; D_1__Proteobacteria; D_2__Gammaproteobacteria; D_3__Betaproteobacteriales											0	0	0	0	0	0	0.0280554	0	0
717	0	0	0	0	0	0	8	0	0	D_0__Bacteria											0	0	0	0	0	0	0.0280554	0	0
718	0	0	0	0	0	0	8	0	0	D_0__Bacteria; D_1__Latescibacteria; D_2__uncultured Latescibacteria bacterium; D_3__uncultured Latescibacteria bacterium; D_4__uncultured Latescibacteria bacterium; D_5__uncultured Latescibacteria bacterium; D_6__uncultured Latescibacteria bacterium											0	0	0	0	0	0	0.0280554	0	0
719	0	0	0	0	0	0	8	0	0	D_0__Bacteria; D_1__Bacteroidetes; D_2__Bacteroidia; D_3__Chitinophagales; D_4__Chitinophagaceae; D_5__Terrimonas											0	0	0	0	0	0	0.0280554	0	0
755	0	0	0	0	0	0	8	0	0	D_0__Bacteria											0	0	0	0	0	0	0.0280554	0	0
770	0	0	0	0	0	0	8	0	0	D_0__Bacteria											0	0	0	0	0	0	0.0280554	0	0
837	0	0	0	0	0	0	8	0	0	D_0__Bacteria; D_1__Proteobacteria; D_2__Alphaproteobacteria; D_3__Caulobacterales; D_4__Caulobacteraceae; D_5__Phenylobacterium; Ambiguous_taxa											0	0	0	0	0	0	0.0280554	0	0
853	0	0	0	0	0	0	8	0	0	D_0__Bacteria; D_1__Proteobacteria; D_2__Deltaproteobacteria; D_3__Syntrophobacterales; D_4__Syntrophaceae; D_5__uncultured; D_6__uncultured delta proteobacterium											0	0	0	0	0	0	0.0280554	0	0
874	0	0	0	0	0	0	8	0	0	D_0__Bacteria; D_1__Proteobacteria; D_2__Gammaproteobacteria; D_3__Methylococcales; D_4__Methylococcaceae											0	0	0	0	0	0	0.0280554	0	0
930	0	0	0	0	0	0	8	0	0	D_0__Bacteria; D_1__Bacteroidetes; D_2__Bacteroidia; D_3__Sphingobacteriales; D_4__AKYH767											0	0	0	0	0	0	0.0280554	0	0
973	0	0	0	0	0	0	8	0	0	D_0__Bacteria; D_1__Chloroflexi; D_2__Dehalococcoidia; D_3__SAR202 clade; D_4__uncultured gamma proteobacterium; D_5__uncultured gamma proteobacterium; D_6__uncultured gamma proteobacterium											0	0	0	0	0	0	0.0280554	0	0
1175	0	0	0	0	0	0	8	0	0	D_0__Bacteria; D_1__Omnitrophicaeota; D_2__uncultured bacterium; D_3__uncultured bacterium; D_4__uncultured bacterium; D_5__uncultured bacterium; D_6__uncultured bacterium											0	0	0	0	0	0	0.0280554	0	0
1206	0	0	0	0	0	0	8	0	0	D_0__Bacteria; D_1__Proteobacteria; D_2__Gammaproteobacteria; D_3__Betaproteobacteriales; D_4__Burkholderiaceae											0	0	0	0	0	0	0.0280554	0	0
1257	0	0	0	0	0	0	8	0	0	D_0__Bacteria; D_1__Actinobacteria; D_2__Actinobacteria; D_3__Propionibacteriales; D_4__Nocardioidaceae; D_5__Nocardioides											0	0	0	0	0	0	0.0280554	0	0
1305	0	0	0	0	0	0	8	0	0	D_0__Bacteria; D_1__Actinobacteria; D_2__Coriobacteriia; D_3__CG2-30-50-142; D_4__uncultured actinobacterium; D_5__uncultured actinobacterium; D_6__uncultured actinobacterium											0	0	0	0	0	0	0.0280554	0	0
1714	0	0	0	0	0	0	8	0	0	D_0__Bacteria; D_1__Actinobacteria; D_2__Actinobacteria; D_3__Micrococcales											0	0	0	0	0	0	0.0280554	0	0
1876	0	0	0	0	0	0	8	0	0	D_0__Bacteria; D_1__Proteobacteria; D_2__Alphaproteobacteria; D_3__Rhizobiales; D_4__Beijerinckiaceae											0	0	0	0	0	0	0.0280554	0	0
1912	0	0	0	0	0	0	8	0	0	D_0__Bacteria; D_1__Proteobacteria; D_2__Gammaproteobacteria; D_3__Betaproteobacteriales; D_4__Gallionellaceae											0	0	0	0	0	0	0.0280554	0	0
2338	0	0	0	0	0	0	8	0	0	D_0__Bacteria; D_1__Proteobacteria; D_2__Alphaproteobacteria; D_3__Caulobacterales; D_4__Caulobacteraceae; D_5__Brevundimonas											0	0	0	0	0	0	0.0280554	0	0
2358	0	0	0	0	0	0	8	0	0	D_0__Bacteria; D_1__Chloroflexi											0	0	0	0	0	0	0.0280554	0	0
2669	0	0	0	0	0	0	8	0	0	D_0__Bacteria; D_1__Proteobacteria; D_2__Gammaproteobacteria; D_3__Pseudomonadales; D_4__Moraxellaceae; D_5__Alkanindiges											0	0	0	0	0	0	0.0280554	0	0
2838	0	0	0	0	0	0	8	0	0	D_0__Bacteria; D_1__Proteobacteria; D_2__Gammaproteobacteria; D_3__Betaproteobacteriales; D_4__Gallionellaceae											0	0	0	0	0	0	0.0280554	0	0
2965	0	0	0	0	0	0	8	0	0	D_0__Bacteria; D_1__Deinococcus-Thermus; D_2__Deinococci; D_3__Deinococcales; D_4__Deinococcaceae; D_5__Deinococcus											0	0	0	0	0	0	0.0280554	0	0
3386	0	0	0	0	0	0	8	0	0	D_0__Bacteria; D_1__Proteobacteria; D_2__Alphaproteobacteria; D_3__Rhodobacterales; D_4__Rhodobacteraceae; D_5__Paracoccus											0	0	0	0	0	0	0.0280554	0	0
3478	0	0	0	0	0	0	8	0	0	D_0__Bacteria; D_1__GAL15; D_2__uncultured bacterium; D_3__uncultured bacterium; D_4__uncultured bacterium; D_5__uncultured bacterium; D_6__uncultured bacterium											0	0	0	0	0	0	0.0280554	0	0
3796	0	0	0	0	0	0	8	0	0	D_0__Bacteria; D_1__Proteobacteria; D_2__Gammaproteobacteria; D_3__Betaproteobacteriales; D_4__Rhodocyclaceae											0	0	0	0	0	0	0.0280554	0	0
3970	0	0	0	0	0	0	8	0	0	D_0__Bacteria; D_1__Actinobacteria; D_2__Actinobacteria; D_3__Propionibacteriales; D_4__Nocardioidaceae; D_5__Nocardioides; D_6__uncultured Nocardioides sp.											0	0	0	0	0	0	0.0280554	0	0
4703	0	0	0	0	0	0	8	0	0	D_0__Bacteria; D_1__Proteobacteria; D_2__Gammaproteobacteria; D_3__Betaproteobacteriales; D_4__Gallionellaceae											0	0	0	0	0	0	0.0280554	0	0
4722	0	0	0	0	0	0	8	0	0	D_0__Bacteria; D_1__Proteobacteria; D_2__Gammaproteobacteria; D_3__Betaproteobacteriales; D_4__Gallionellaceae											0	0	0	0	0	0	0.0280554	0	0
5115	0	0	0	0	0	0	8	0	0	D_0__Bacteria; D_1__Proteobacteria; D_2__Gammaproteobacteria; D_3__Betaproteobacteriales; D_4__Gallionellaceae											0	0	0	0	0	0	0.0280554	0	0
5590	0	0	0	0	0	0	8	0	0	D_0__Bacteria; D_1__Nitrospirae; D_2__BMS9AB35											0	0	0	0	0	0	0.0280554	0	0
6357	0	0	0	0	0	0	8	0	0	D_0__Archaea; D_1__Euryarchaeota; D_2__Methanomicrobia; D_3__Methanosarcinales; D_4__Methanoperedenaceae; D_5__Candidatus Methanoperedens											0	0	0	0	0	0	0.0280554	0	0
6410	0	0	0	0	0	0	8	0	0	D_0__Bacteria; D_1__Nitrospirae; D_2__BMS9AB35; Ambiguous_taxa; Ambiguous_taxa; Ambiguous_taxa; Ambiguous_taxa											0	0	0	0	0	0	0.0280554	0	0
6944	0	0	0	0	0	0	8	0	0	D_0__Bacteria; D_1__Proteobacteria; D_2__Gammaproteobacteria; D_3__Pseudomonadales; D_4__Moraxellaceae; D_5__Alkanindiges											0	0	0	0	0	0	0.0280554	0	0
7265	0	0	0	0	0	0	8	0	0	D_0__Bacteria; D_1__Proteobacteria; D_2__Alphaproteobacteria; D_3__Rhizobiales; D_4__Beijerinckiaceae											0	0	0	0	0	0	0.0280554	0	0
7326	0	0	0	0	0	0	8	0	0	D_0__Bacteria; D_1__Proteobacteria; D_2__Gammaproteobacteria; D_3__Betaproteobacteriales; D_4__Gallionellaceae											0	0	0	0	0	0	0.0280554	0	0
7452	0	0	0	0	0	0	8	0	0	D_0__Bacteria; D_1__Actinobacteria; D_2__Actinobacteria; D_3__Micrococcales											0	0	0	0	0	0	0.0280554	0	0
7477	0	0	0	0	0	0	8	0	0	D_0__Bacteria; D_1__Actinobacteria; D_2__Actinobacteria; D_3__Micrococcales											0	0	0	0	0	0	0.0280554	0	0
8094	0	0	0	0	0	0	8	0	0	D_0__Bacteria; D_1__Proteobacteria; D_2__Gammaproteobacteria; D_3__Betaproteobacteriales; D_4__Gallionellaceae											0	0	0	0	0	0	0.0280554	0	0
8129	0	0	0	0	0	0	8	0	0	D_0__Bacteria; D_1__Actinobacteria; D_2__Actinobacteria; D_3__Micrococcales; D_4__Intrasporangiaceae; D_5__Ornithinimicrobium; Ambiguous_taxa											0	0	0	0	0	0	0.0280554	0	0
8227	0	0	0	0	0	0	8	0	0	D_0__Bacteria; D_1__Proteobacteria; D_2__Gammaproteobacteria; D_3__Pseudomonadales; D_4__Moraxellaceae; D_5__Acinetobacter											0	0	0	0	0	0	0.0280554	0	0
8456	0	0	0	0	0	0	8	0	0	D_0__Bacteria; D_1__Proteobacteria; D_2__Alphaproteobacteria; D_3__Sphingomonadales; D_4__Sphingomonadaceae											0	0	0	0	0	0	0.0280554	0	0
9098	0	0	0	0	0	0	8	0	0	D_0__Bacteria; D_1__Proteobacteria; D_2__Gammaproteobacteria; D_3__Betaproteobacteriales; D_4__Gallionellaceae											0	0	0	0	0	0	0.0280554	0	0
9127	0	0	0	0	0	0	8	0	0	D_0__Bacteria; D_1__Proteobacteria; D_2__Alphaproteobacteria; D_3__Caulobacterales; D_4__Caulobacteraceae; D_5__Brevundimonas											0	0	0	0	0	0	0.0280554	0	0
9379	0	0	0	0	0	0	8	0	0	D_0__Bacteria; D_1__Actinobacteria; D_2__Actinobacteria; D_3__Propionibacteriales; D_4__Nocardioidaceae; D_5__Nocardioides											0	0	0	0	0	0	0.0280554	0	0
9460	0	0	0	0	0	0	8	0	0	D_0__Bacteria; D_1__Proteobacteria; D_2__Gammaproteobacteria; D_3__Pseudomonadales; D_4__Moraxellaceae; D_5__Acinetobacter											0	0	0	0	0	0	0.0280554	0	0
9627	0	0	0	0	0	0	8	0	0	D_0__Bacteria; D_1__Elusimicrobia; D_2__Elusimicrobia; D_3__Lineage IV; Ambiguous_taxa; Ambiguous_taxa; Ambiguous_taxa											0	0	0	0	0	0	0.0280554	0	0
9680	0	0	0	0	0	0	8	0	0	D_0__Bacteria; D_1__Proteobacteria; D_2__Gammaproteobacteria; D_3__Betaproteobacteriales; D_4__Gallionellaceae; D_5__Sideroxydans											0	0	0	0	0	0	0.0280554	0	0
9738	0	0	0	0	0	0	8	0	0	D_0__Bacteria; D_1__Proteobacteria; D_2__Gammaproteobacteria; D_3__Pseudomonadales; D_4__Moraxellaceae; D_5__Acinetobacter											0	0	0	0	0	0	0.0280554	0	0
9931	0	0	0	0	0	0	8	0	0	D_0__Bacteria; D_1__Proteobacteria; D_2__Gammaproteobacteria; D_3__Pseudomonadales; D_4__Moraxellaceae; D_5__Acinetobacter											0	0	0	0	0	0	0.0280554	0	0
10238	0	0	0	0	0	0	8	0	0	D_0__Bacteria; D_1__Proteobacteria; D_2__Gammaproteobacteria; D_3__Pseudomonadales; D_4__Moraxellaceae; D_5__Acinetobacter											0	0	0	0	0	0	0.0280554	0	0
10358	0	0	0	0	0	0	8	0	0	D_0__Bacteria; D_1__Proteobacteria; D_2__Gammaproteobacteria; D_3__Betaproteobacteriales; D_4__Gallionellaceae; D_5__Sideroxydans											0	0	0	0	0	0	0.0280554	0	0
10359	0	0	0	0	0	0	8	0	0	D_0__Bacteria; D_1__Actinobacteria; D_2__Actinobacteria; D_3__Micrococcales; D_4__Intrasporangiaceae											0	0	0	0	0	0	0.0280554	0	0
10467	0	0	0	0	0	0	8	0	0	D_0__Bacteria; D_1__Proteobacteria; D_2__Alphaproteobacteria; D_3__Sphingomonadales; D_4__Sphingomonadaceae											0	0	0	0	0	0	0.0280554	0	0
480	0	0	0	0	12	0	7	0	0	D_0__Bacteria; D_1__Proteobacteria; D_2__Alphaproteobacteria					BIC						0	0	0	0	0.0420831	0	0.0245485	0	0
174	0	0	0	0	0	0	7	0	0	D_0__Archaea; D_1__Euryarchaeota; D_2__Methanomicrobia; D_3__Methanosarcinales; D_4__Methanoperedenaceae; D_5__Candidatus Methanoperedens											0	0	0	0	0	0	0.0245485	0	0
465	0	0	0	0	0	0	7	0	0	D_0__Bacteria; D_1__Proteobacteria; D_2__Deltaproteobacteria; D_3__Myxococcales											0	0	0	0	0	0	0.0245485	0	0
476	0	0	0	0	0	0	7	0	0	D_0__Bacteria; D_1__Omnitrophicaeota											0	0	0	0	0	0	0.0245485	0	0
495	0	0	0	0	0	0	7	0	0	D_0__Bacteria											0	0	0	0	0	0	0.0245485	0	0
555	0	0	0	0	0	0	7	0	0	D_0__Bacteria; D_1__Omnitrophicaeota; D_2__uncultured bacterium; D_3__uncultured bacterium; D_4__uncultured bacterium; D_5__uncultured bacterium; D_6__uncultured bacterium											0	0	0	0	0	0	0.0245485	0	0
560	0	0	0	0	0	0	7	0	0	D_0__Archaea; D_1__Altiarchaeota; D_2__Altiarchaeia											0	0	0	0	0	0	0.0245485	0	0
575	0	0	0	0	0	0	7	0	0	D_0__Bacteria; D_1__Proteobacteria; D_2__Gammaproteobacteria; D_3__Diplorickettsiales; D_4__Diplorickettsiaceae; D_5__Aquicella											0	0	0	0	0	0	0.0245485	0	0
579	0	0	0	0	0	0	7	0	0	D_0__Bacteria											0	0	0	0	0	0	0.0245485	0	0
583	0	0	0	0	0	0	7	0	0	D_0__Bacteria; D_1__Omnitrophicaeota; D_2__uncultured bacterium; D_3__uncultured bacterium; D_4__uncultured bacterium; D_5__uncultured bacterium; D_6__uncultured bacterium											0	0	0	0	0	0	0.0245485	0	0
676	0	0	0	0	0	0	7	0	0	D_0__Bacteria; D_1__Latescibacteria; D_2__uncultured proteobacterium; D_3__uncultured proteobacterium; D_4__uncultured proteobacterium; D_5__uncultured proteobacterium; D_6__uncultured proteobacterium											0	0	0	0	0	0	0.0245485	0	0
726	0	0	0	0	0	0	7	0	0	D_0__Bacteria; D_1__Omnitrophicaeota; D_2__uncultured bacterium; D_3__uncultured bacterium; D_4__uncultured bacterium; D_5__uncultured bacterium; D_6__uncultured bacterium											0	0	0	0	0	0	0.0245485	0	0
749	0	0	0	0	0	0	7	0	0	D_0__Bacteria; D_1__Acidobacteria; D_2__Holophagae; D_3__Holophagales; D_4__Holophagaceae; D_5__Geothrix; D_6__uncultured bacterium											0	0	0	0	0	0	0.0245485	0	0
806	0	0	0	0	0	0	7	0	0	D_0__Bacteria											0	0	0	0	0	0	0.0245485	0	0
813	0	0	0	0	0	0	7	0	0	D_0__Bacteria; D_1__Gemmatimonadetes; D_2__Gemmatimonadetes; D_3__Gemmatimonadales; D_4__Gemmatimonadaceae; D_5__uncultured											0	0	0	0	0	0	0.0245485	0	0
851	0	0	0	0	0	0	7	0	0	D_0__Bacteria											0	0	0	0	0	0	0.0245485	0	0
873	0	0	0	0	0	0	7	0	0	D_0__Bacteria; D_1__Omnitrophicaeota; D_2__uncultured bacterium; D_3__uncultured bacterium; D_4__uncultured bacterium; D_5__uncultured bacterium; D_6__uncultured bacterium											0	0	0	0	0	0	0.0245485	0	0
913	0	0	0	0	0	0	7	0	0	D_0__Bacteria; D_1__Actinobacteria; D_2__Coriobacteriia; D_3__CG2-30-50-142; D_4__uncultured actinobacterium; D_5__uncultured actinobacterium; D_6__uncultured actinobacterium											0	0	0	0	0	0	0.0245485	0	0
1121	0	0	0	0	0	0	7	0	0	D_0__Bacteria; D_1__Omnitrophicaeota; D_2__uncultured bacterium; D_3__uncultured bacterium; D_4__uncultured bacterium; D_5__uncultured bacterium; D_6__uncultured bacterium											0	0	0	0	0	0	0.0245485	0	0
1386	0	0	0	0	0	0	7	0	0	D_0__Bacteria; D_1__Proteobacteria; D_2__Gammaproteobacteria; D_3__Betaproteobacteriales											0	0	0	0	0	0	0.0245485	0	0
1730	0	0	0	0	0	0	7	0	0	D_0__Bacteria; D_1__Proteobacteria; D_2__Gammaproteobacteria; D_3__Pseudomonadales; D_4__Moraxellaceae; D_5__Acinetobacter											0	0	0	0	0	0	0.0245485	0	0
1992	0	0	0	0	0	0	7	0	0	D_0__Bacteria; D_1__Proteobacteria; D_2__Gammaproteobacteria; D_3__Pseudomonadales; D_4__Moraxellaceae; D_5__Acinetobacter											0	0	0	0	0	0	0.0245485	0	0
2067	0	0	0	0	0	0	7	0	0	D_0__Bacteria; D_1__Proteobacteria; D_2__Alphaproteobacteria; D_3__Rhizobiales											0	0	0	0	0	0	0.0245485	0	0
2632	0	0	0	0	0	0	7	0	0	D_0__Bacteria; D_1__Proteobacteria; D_2__Alphaproteobacteria; D_3__Rhodobacterales; D_4__Rhodobacteraceae											0	0	0	0	0	0	0.0245485	0	0
2935	0	0	0	0	0	0	7	0	0	D_0__Bacteria; D_1__Proteobacteria; D_2__Gammaproteobacteria; D_3__Pseudomonadales; D_4__Moraxellaceae; D_5__Acinetobacter											0	0	0	0	0	0	0.0245485	0	0
3262	0	0	0	0	0	0	7	0	0	D_0__Bacteria; D_1__Actinobacteria; D_2__Actinobacteria; D_3__Micrococcales; D_4__Intrasporangiaceae											0	0	0	0	0	0	0.0245485	0	0
3527	0	0	0	0	0	0	7	0	0	D_0__Bacteria; D_1__Proteobacteria; D_2__Gammaproteobacteria; D_3__Betaproteobacteriales											0	0	0	0	0	0	0.0245485	0	0
3687	0	0	0	0	0	0	7	0	0	D_0__Bacteria; D_1__Proteobacteria; D_2__Gammaproteobacteria; D_3__Pseudomonadales; D_4__Moraxellaceae; D_5__Acinetobacter											0	0	0	0	0	0	0.0245485	0	0
4031	0	0	0	0	0	0	7	0	0	D_0__Bacteria; D_1__Actinobacteria; D_2__Actinobacteria; D_3__Micrococcales; D_4__Intrasporangiaceae											0	0	0	0	0	0	0.0245485	0	0
4331	0	0	0	0	0	0	7	0	0	D_0__Bacteria; D_1__Proteobacteria; D_2__Alphaproteobacteria; D_3__Sphingomonadales; D_4__Sphingomonadaceae; D_5__Sphingobium											0	0	0	0	0	0	0.0245485	0	0
4689	0	0	0	0	0	0	7	0	0	D_0__Bacteria; D_1__Proteobacteria; D_2__Gammaproteobacteria; D_3__Betaproteobacteriales; D_4__Rhodocyclaceae											0	0	0	0	0	0	0.0245485	0	0
4793	0	0	0	0	0	0	7	0	0	D_0__Bacteria; D_1__Proteobacteria; D_2__Gammaproteobacteria; D_3__Betaproteobacteriales; D_4__Rhodocyclaceae											0	0	0	0	0	0	0.0245485	0	0
5117	0	0	0	0	0	0	7	0	0	D_0__Bacteria; D_1__Proteobacteria; D_2__Gammaproteobacteria											0	0	0	0	0	0	0.0245485	0	0
5529	0	0	0	0	0	0	7	0	0	D_0__Bacteria; D_1__Proteobacteria; D_2__Gammaproteobacteria; D_3__Betaproteobacteriales; D_4__Burkholderiaceae											0	0	0	0	0	0	0.0245485	0	0
5780	0	0	0	0	0	0	7	0	0	D_0__Bacteria; D_1__Proteobacteria; D_2__Gammaproteobacteria; D_3__Betaproteobacteriales; D_4__Gallionellaceae											0	0	0	0	0	0	0.0245485	0	0
5935	0	0	0	0	0	0	7	0	0	D_0__Bacteria; D_1__Proteobacteria; D_2__Gammaproteobacteria; D_3__Betaproteobacteriales; D_4__Rhodocyclaceae											0	0	0	0	0	0	0.0245485	0	0
6403	0	0	0	0	0	0	7	0	0	D_0__Bacteria; D_1__Proteobacteria; D_2__Gammaproteobacteria; D_3__Pseudomonadales; D_4__Moraxellaceae; D_5__Alkanindiges; Ambiguous_taxa											0	0	0	0	0	0	0.0245485	0	0
6579	0	0	0	0	0	0	7	0	0	D_0__Bacteria; D_1__Actinobacteria; D_2__Actinobacteria; D_3__Micrococcales; D_4__Intrasporangiaceae											0	0	0	0	0	0	0.0245485	0	0
6657	0	0	0	0	0	0	7	0	0	D_0__Bacteria; D_1__Nitrospirae; D_2__BMS9AB35											0	0	0	0	0	0	0.0245485	0	0
6812	0	0	0	0	0	0	7	0	0	D_0__Bacteria; D_1__Actinobacteria; D_2__Actinobacteria; D_3__Propionibacteriales; D_4__Nocardioidaceae; D_5__Nocardioides											0	0	0	0	0	0	0.0245485	0	0
6932	0	0	0	0	0	0	7	0	0	D_0__Bacteria; D_1__Deinococcus-Thermus; D_2__Deinococci; D_3__Deinococcales; D_4__Deinococcaceae; D_5__Deinococcus											0	0	0	0	0	0	0.0245485	0	0
7091	0	0	0	0	0	0	7	0	0	D_0__Bacteria; D_1__Proteobacteria; D_2__Alphaproteobacteria; D_3__Caulobacterales; D_4__Caulobacteraceae; D_5__Brevundimonas											0	0	0	0	0	0	0.0245485	0	0
7124	0	0	0	0	0	0	7	0	0	D_0__Bacteria; D_1__Proteobacteria; D_2__Gammaproteobacteria; D_3__Betaproteobacteriales; D_4__Burkholderiaceae; D_5__Massilia											0	0	0	0	0	0	0.0245485	0	0
7633	0	0	0	0	0	0	7	0	0	D_0__Bacteria; D_1__Actinobacteria; D_2__Actinobacteria; D_3__Propionibacteriales; D_4__Nocardioidaceae; D_5__Nocardioides											0	0	0	0	0	0	0.0245485	0	0
8149	0	0	0	0	0	0	7	0	0	D_0__Bacteria; D_1__Proteobacteria; D_2__Gammaproteobacteria; D_3__Betaproteobacteriales; D_4__Gallionellaceae											0	0	0	0	0	0	0.0245485	0	0
8196	0	0	0	0	0	0	7	0	0	D_0__Bacteria; D_1__Proteobacteria; D_2__Gammaproteobacteria; D_3__Betaproteobacteriales; D_4__Burkholderiaceae; D_5__Massilia											0	0	0	0	0	0	0.0245485	0	0
8220	0	0	0	0	0	0	7	0	0	D_0__Bacteria; D_1__Proteobacteria; D_2__Alphaproteobacteria; D_3__Sphingomonadales; D_4__Sphingomonadaceae											0	0	0	0	0	0	0.0245485	0	0
8378	0	0	0	0	0	0	7	0	0	D_0__Bacteria; D_1__Proteobacteria; D_2__Gammaproteobacteria											0	0	0	0	0	0	0.0245485	0	0
8602	0	0	0	0	0	0	7	0	0	D_0__Bacteria; D_1__Proteobacteria; D_2__Gammaproteobacteria; D_3__Pseudomonadales; D_4__Moraxellaceae; D_5__Alkanindiges; Ambiguous_taxa											0	0	0	0	0	0	0.0245485	0	0
8851	0	0	0	0	0	0	7	0	0	D_0__Bacteria; D_1__Proteobacteria; D_2__Gammaproteobacteria; D_3__Pseudomonadales; D_4__Moraxellaceae; D_5__Acinetobacter											0	0	0	0	0	0	0.0245485	0	0
9009	0	0	0	0	0	0	7	0	0	D_0__Bacteria; D_1__Proteobacteria; D_2__Alphaproteobacteria; D_3__Rhodobacterales; D_4__Rhodobacteraceae											0	0	0	0	0	0	0.0245485	0	0
9070	0	0	0	0	0	0	7	0	0	D_0__Bacteria; D_1__Proteobacteria; D_2__Gammaproteobacteria; D_3__Betaproteobacteriales; D_4__Burkholderiaceae; D_5__Massilia; Ambiguous_taxa											0	0	0	0	0	0	0.0245485	0	0
9095	0	0	0	0	0	0	7	0	0	D_0__Bacteria; D_1__Actinobacteria; D_2__Actinobacteria; D_3__Micrococcales; D_4__Intrasporangiaceae											0	0	0	0	0	0	0.0245485	0	0
9325	0	0	0	0	0	0	7	0	0	D_0__Bacteria; D_1__Proteobacteria; D_2__Gammaproteobacteria; D_3__Betaproteobacteriales											0	0	0	0	0	0	0.0245485	0	0
9672	0	0	0	0	0	0	7	0	0	D_0__Bacteria; D_1__Proteobacteria; D_2__Gammaproteobacteria; D_3__Pseudomonadales; D_4__Moraxellaceae; D_5__Acinetobacter											0	0	0	0	0	0	0.0245485	0	0
9710	0	0	0	0	0	0	7	0	0	D_0__Bacteria; D_1__Proteobacteria; D_2__Gammaproteobacteria; D_3__Betaproteobacteriales; D_4__Burkholderiaceae; D_5__Delftia											0	0	0	0	0	0	0.0245485	0	0
9794	0	0	0	0	0	0	7	0	0	D_0__Bacteria; D_1__Proteobacteria; D_2__Gammaproteobacteria; D_3__Betaproteobacteriales; D_4__Burkholderiaceae; D_5__Massilia											0	0	0	0	0	0	0.0245485	0	0
9963	0	0	0	0	0	0	7	0	0	D_0__Bacteria; D_1__Deinococcus-Thermus; D_2__Deinococci; D_3__Deinococcales; D_4__Deinococcaceae; D_5__Deinococcus											0	0	0	0	0	0	0.0245485	0	0
10320	0	0	0	0	0	0	7	0	0	D_0__Bacteria; D_1__Actinobacteria; D_2__Actinobacteria; D_3__Propionibacteriales; D_4__Nocardioidaceae; D_5__Nocardioides; D_6__uncultured Nocardioides sp.											0	0	0	0	0	0	0.0245485	0	0
10459	0	0	0	0	0	0	7	0	0	D_0__Bacteria; D_1__Proteobacteria; D_2__Gammaproteobacteria; D_3__Betaproteobacteriales; D_4__Rhodocyclaceae											0	0	0	0	0	0	0.0245485	0	0
10587	0	0	0	0	0	0	7	0	0	D_0__Bacteria; D_1__Proteobacteria; D_2__Gammaproteobacteria; D_3__Betaproteobacteriales; D_4__Rhodocyclaceae											0	0	0	0	0	0	0.0245485	0	0
281	0	29	2	0	0	1	6	0	0	D_0__Bacteria; D_1__Proteobacteria; D_2__Gammaproteobacteria; D_3__Betaproteobacteriales; D_4__Burkholderiaceae		NT	FE			MIX					0	0.101701	0.00701385	0	0	0.00350693	0.0210416	0	0
376	0	0	0	0	0	0	6	0	0	D_0__Bacteria; D_1__Chloroflexi; D_2__Dehalococcoidia; D_3__S085; D_4__uncultured bacterium; D_5__uncultured bacterium; D_6__uncultured bacterium											0	0	0	0	0	0	0.0210416	0	0
534	0	0	0	0	0	0	6	0	0	D_0__Bacteria; D_1__Chloroflexi											0	0	0	0	0	0	0.0210416	0	0
554	0	0	0	0	0	0	6	0	0	D_0__Bacteria; D_1__Actinobacteria; D_2__Coriobacteriia											0	0	0	0	0	0	0.0210416	0	0
603	0	0	0	0	0	0	6	0	0	D_0__Bacteria; D_1__Bacteroidetes; D_2__Bacteroidia; D_3__Cytophagales; D_4__Hymenobacteraceae; D_5__Hymenobacter; D_6__Hymenobacter sp.											0	0	0	0	0	0	0.0210416	0	0
613	0	0	0	0	0	0	6	0	0	D_0__Bacteria; D_1__Proteobacteria; D_2__Deltaproteobacteria; D_3__Sva0485											0	0	0	0	0	0	0.0210416	0	0
627	0	0	0	0	0	0	6	0	0	D_0__Bacteria											0	0	0	0	0	0	0.0210416	0	0
629	0	0	0	0	0	0	6	0	0	D_0__Bacteria; D_1__Proteobacteria; D_2__Gammaproteobacteria; D_3__Xanthomonadales; D_4__Xanthomonadaceae; D_5__Stenotrophomonas											0	0	0	0	0	0	0.0210416	0	0
632	0	0	0	0	0	0	6	0	0	D_0__Bacteria; D_1__Proteobacteria; D_2__Gammaproteobacteria; D_3__Betaproteobacteriales; D_4__Gallionellaceae											0	0	0	0	0	0	0.0210416	0	0
638	0	0	0	0	0	0	6	0	0	D_0__Bacteria; D_1__Planctomycetes; D_2__Pla4 lineage; D_3__uncultured bacterium; D_4__uncultured bacterium; D_5__uncultured bacterium; D_6__uncultured bacterium											0	0	0	0	0	0	0.0210416	0	0
647	0	0	0	0	0	0	6	0	0	D_0__Bacteria											0	0	0	0	0	0	0.0210416	0	0
658	0	0	0	0	0	0	6	0	0	D_0__Bacteria; D_1__Rokubacteria; D_2__NC10; D_3__Methylomirabilales; D_4__Methylomirabilaceae											0	0	0	0	0	0	0.0210416	0	0
663	0	0	0	0	0	0	6	0	0	D_0__Bacteria; D_1__Patescibacteria; D_2__Gracilibacteria											0	0	0	0	0	0	0.0210416	0	0
687	0	0	0	0	0	0	6	0	0	D_0__Archaea; D_1__Euryarchaeota; D_2__Methanomicrobia; D_3__Methanosarcinales; D_4__Methanoperedenaceae											0	0	0	0	0	0	0.0210416	0	0
698	0	0	0	0	0	0	6	0	0	D_0__Bacteria; D_1__Proteobacteria; D_2__Alphaproteobacteria; D_3__Rhodobacterales; D_4__Rhodobacteraceae											0	0	0	0	0	0	0.0210416	0	0
701	0	0	0	0	0	0	6	0	0	D_0__Bacteria											0	0	0	0	0	0	0.0210416	0	0
710	0	0	0	0	0	0	6	0	0	D_0__Bacteria; D_1__Actinobacteria											0	0	0	0	0	0	0.0210416	0	0
736	0	0	0	0	0	0	6	0	0	D_0__Bacteria											0	0	0	0	0	0	0.0210416	0	0
738	0	0	0	0	0	0	6	0	0	D_0__Bacteria; D_1__Proteobacteria; D_2__Gammaproteobacteria; D_3__Pseudomonadales; D_4__Moraxellaceae; D_5__Acinetobacter											0	0	0	0	0	0	0.0210416	0	0
753	0	0	0	0	0	0	6	0	0	D_0__Bacteria; D_1__Proteobacteria; D_2__Gammaproteobacteria											0	0	0	0	0	0	0.0210416	0	0
763	0	0	0	0	0	0	6	0	0	D_0__Bacteria; D_1__Proteobacteria; D_2__Gammaproteobacteria; D_3__Betaproteobacteriales; D_4__Burkholderiaceae; D_5__Massilia											0	0	0	0	0	0	0.0210416	0	0
766	0	0	0	0	0	0	6	0	0	D_0__Bacteria; D_1__Bacteroidetes; D_2__Rhodothermia; D_3__Rhodothermales; D_4__Rhodothermaceae; D_5__Rubrivirga											0	0	0	0	0	0	0.0210416	0	0
783	0	0	0	0	0	0	6	0	0	D_0__Bacteria; D_1__Omnitrophicaeota; D_2__uncultured bacterium; D_3__uncultured bacterium; D_4__uncultured bacterium; D_5__uncultured bacterium; D_6__uncultured bacterium											0	0	0	0	0	0	0.0210416	0	0
787	0	0	0	0	0	0	6	0	0	D_0__Bacteria; D_1__Proteobacteria; D_2__Deltaproteobacteria; D_3__Syntrophobacterales; D_4__Syntrophaceae; D_5__Smithella											0	0	0	0	0	0	0.0210416	0	0
792	0	0	0	0	0	0	6	0	0	D_0__Bacteria; D_1__Proteobacteria; D_2__Gammaproteobacteria; D_3__Pseudomonadales; D_4__Moraxellaceae; D_5__Acinetobacter											0	0	0	0	0	0	0.0210416	0	0
830	0	0	0	0	0	0	6	0	0	D_0__Bacteria											0	0	0	0	0	0	0.0210416	0	0
862	0	0	0	0	0	0	6	0	0	D_0__Bacteria; D_1__GAL15; D_2__uncultured bacterium; D_3__uncultured bacterium; D_4__uncultured bacterium; D_5__uncultured bacterium; D_6__uncultured bacterium											0	0	0	0	0	0	0.0210416	0	0
865	0	0	0	0	0	0	6	0	0	D_0__Bacteria; D_1__Acidobacteria; D_2__Aminicenantia; D_3__Aminicenantales; D_4__uncultured bacterium; D_5__uncultured bacterium; D_6__uncultured bacterium											0	0	0	0	0	0	0.0210416	0	0
880	0	0	0	0	0	0	6	0	0	D_0__Bacteria; D_1__Nitrospirae; D_2__Thermodesulfovibrionia; D_3__uncultured											0	0	0	0	0	0	0.0210416	0	0
883	0	0	0	0	0	0	6	0	0	D_0__Bacteria											0	0	0	0	0	0	0.0210416	0	0
894	0	0	0	0	0	0	6	0	0	D_0__Bacteria											0	0	0	0	0	0	0.0210416	0	0
895	0	0	0	0	0	0	6	0	0	D_0__Bacteria; D_1__Rokubacteria; D_2__NC10; D_3__Rokubacteriales											0	0	0	0	0	0	0.0210416	0	0
905	0	0	0	0	0	0	6	0	0	D_0__Bacteria; D_1__Proteobacteria; D_2__Deltaproteobacteria											0	0	0	0	0	0	0.0210416	0	0
950	0	0	0	0	0	0	6	0	0	D_0__Bacteria; D_1__Planctomycetes; D_2__Planctomycetacia; D_3__Planctomycetales											0	0	0	0	0	0	0.0210416	0	0
963	0	0	0	0	0	0	6	0	0	D_0__Bacteria; D_1__Chloroflexi; D_2__Dehalococcoidia; D_3__GIF9											0	0	0	0	0	0	0.0210416	0	0
984	0	0	0	0	0	0	6	0	0	D_0__Bacteria; D_1__Acidobacteria; D_2__Aminicenantia; D_3__Aminicenantales; D_4__uncultured bacterium; D_5__uncultured bacterium; D_6__uncultured bacterium											0	0	0	0	0	0	0.0210416	0	0
988	0	0	0	0	0	0	6	0	0	D_0__Bacteria; D_1__Acidobacteria; D_2__Thermoanaerobaculia; D_3__Thermoanaerobaculales; D_4__Thermoanaerobaculaceae; D_5__Thermoanaerobaculum											0	0	0	0	0	0	0.0210416	0	0
1004	0	0	0	0	0	0	6	0	0	D_0__Bacteria; D_1__Proteobacteria; D_2__Gammaproteobacteria											0	0	0	0	0	0	0.0210416	0	0
1146	0	0	0	0	0	0	6	0	0	D_0__Bacteria; D_1__Acidobacteria; D_2__Blastocatellia (Subgroup 4); D_3__Blastocatellales; D_4__Blastocatellaceae											0	0	0	0	0	0	0.0210416	0	0
1173	0	0	0	0	0	0	6	0	0	D_0__Bacteria; D_1__Bacteroidetes; D_2__Ignavibacteria; D_3__Kryptoniales; D_4__BSV26; D_5__uncultured bacterium; D_6__uncultured bacterium											0	0	0	0	0	0	0.0210416	0	0
1209	0	0	0	0	0	0	6	0	0	D_0__Bacteria; D_1__Lentisphaerae; D_2__Lentisphaeria; D_3__Victivallales											0	0	0	0	0	0	0.0210416	0	0
1213	0	0	0	0	0	0	6	0	0	D_0__Bacteria; D_1__Actinobacteria; D_2__Acidimicrobiia; D_3__Microtrichales; D_4__Ilumatobacteraceae; D_5__uncultured											0	0	0	0	0	0	0.0210416	0	0
1226	0	0	0	0	0	0	6	0	0	D_0__Bacteria; D_1__Omnitrophicaeota											0	0	0	0	0	0	0.0210416	0	0
1236	0	0	0	0	0	0	6	0	0	D_0__Bacteria; D_1__Proteobacteria; D_2__Gammaproteobacteria; D_3__Pseudomonadales; D_4__Moraxellaceae; D_5__Acinetobacter											0	0	0	0	0	0	0.0210416	0	0
1238	0	0	0	0	0	0	6	0	0	D_0__Bacteria; D_1__Actinobacteria; D_2__Coriobacteriia; D_3__FS118-23B-02; D_4__uncultured bacterium; D_5__uncultured bacterium; D_6__uncultured bacterium											0	0	0	0	0	0	0.0210416	0	0
1285	0	0	0	0	0	0	6	0	0	D_0__Bacteria; D_1__Rokubacteria; D_2__NC10; D_3__Methylomirabilales; D_4__Methylomirabilaceae; D_5__Sh765B-TzT-35; D_6__uncultured bacterium											0	0	0	0	0	0	0.0210416	0	0
1372	0	0	0	0	0	0	6	0	0	D_0__Archaea; D_1__Crenarchaeota; D_2__Bathyarchaeia; D_3__uncultured crenarchaeote; D_4__uncultured crenarchaeote; D_5__uncultured crenarchaeote; D_6__uncultured crenarchaeote											0	0	0	0	0	0	0.0210416	0	0
1393	0	0	0	0	0	0	6	0	0	D_0__Bacteria; D_1__Nitrospirae; D_2__Nitrospira; D_3__Nitrospirales; D_4__Nitrospiraceae; D_5__Nitrospira; D_6__Ephemera danica											0	0	0	0	0	0	0.0210416	0	0
1406	0	0	0	0	0	0	6	0	0	D_0__Bacteria; D_1__Chloroflexi; D_2__Anaerolineae; D_3__Thermoflexales; D_4__Thermoflexaceae; D_5__Thermoflexus; D_6__uncultured bacterium											0	0	0	0	0	0	0.0210416	0	0
1484	0	0	0	0	0	0	6	0	0	D_0__Bacteria; D_1__Proteobacteria; D_2__Gammaproteobacteria; D_3__Betaproteobacteriales; D_4__Gallionellaceae											0	0	0	0	0	0	0.0210416	0	0
1524	0	0	0	0	0	0	6	0	0	D_0__Bacteria; D_1__Proteobacteria; D_2__Gammaproteobacteria; D_3__Betaproteobacteriales; D_4__Rhodocyclaceae											0	0	0	0	0	0	0.0210416	0	0
1568	0	0	0	0	0	0	6	0	0	D_0__Bacteria											0	0	0	0	0	0	0.0210416	0	0
1614	0	0	0	0	0	0	6	0	0	D_0__Bacteria; D_1__Actinobacteria; D_2__Actinobacteria; D_3__Propionibacteriales; D_4__Nocardioidaceae; D_5__Nocardioides; D_6__uncultured Nocardioides sp.											0	0	0	0	0	0	0.0210416	0	0
1621	0	0	0	0	0	0	6	0	0	D_0__Bacteria; D_1__Proteobacteria; D_2__Gammaproteobacteria; D_3__Betaproteobacteriales											0	0	0	0	0	0	0.0210416	0	0
1759	0	0	0	0	0	0	6	0	0	D_0__Bacteria; D_1__Proteobacteria; D_2__Gammaproteobacteria; D_3__Betaproteobacteriales											0	0	0	0	0	0	0.0210416	0	0
1788	0	0	0	0	0	0	6	0	0	D_0__Bacteria; D_1__Actinobacteria; D_2__Actinobacteria; D_3__Propionibacteriales; D_4__Nocardioidaceae; D_5__Nocardioides; Ambiguous_taxa											0	0	0	0	0	0	0.0210416	0	0
2077	0	0	0	0	0	0	6	0	0	D_0__Bacteria											0	0	0	0	0	0	0.0210416	0	0
2215	0	0	0	0	0	0	6	0	0	D_0__Archaea; D_1__Altiarchaeota; D_2__Altiarchaeia											0	0	0	0	0	0	0.0210416	0	0
2223	0	0	0	0	0	0	6	0	0	D_0__Bacteria; D_1__Omnitrophicaeota; D_2__uncultured bacterium; D_3__uncultured bacterium; D_4__uncultured bacterium; D_5__uncultured bacterium; D_6__uncultured bacterium											0	0	0	0	0	0	0.0210416	0	0
2381	0	0	0	0	0	0	6	0	0	D_0__Bacteria; D_1__Proteobacteria; D_2__Alphaproteobacteria; D_3__Rhizobiales; D_4__Hyphomicrobiaceae											0	0	0	0	0	0	0.0210416	0	0
2460	0	0	0	0	0	0	6	0	0	D_0__Bacteria											0	0	0	0	0	0	0.0210416	0	0
2579	0	0	0	0	0	0	6	0	0	D_0__Bacteria; D_1__Nitrospirae; D_2__Nitrospira; D_3__Nitrospirales; D_4__Nitrospiraceae; D_5__Nitrospira											0	0	0	0	0	0	0.0210416	0	0
2848	0	0	0	0	0	0	6	0	0	D_0__Bacteria; D_1__Proteobacteria; D_2__Gammaproteobacteria; D_3__Pseudomonadales; D_4__Moraxellaceae; D_5__Acinetobacter											0	0	0	0	0	0	0.0210416	0	0
2903	0	0	0	0	0	0	6	0	0	D_0__Bacteria; D_1__Proteobacteria; D_2__Gammaproteobacteria; D_3__Betaproteobacteriales; D_4__Rhodocyclaceae											0	0	0	0	0	0	0.0210416	0	0
3018	0	0	0	0	0	0	6	0	0	D_0__Bacteria; D_1__Nitrospirae; D_2__BMS9AB35											0	0	0	0	0	0	0.0210416	0	0
3103	0	0	0	0	0	0	6	0	0	D_0__Bacteria; D_1__Proteobacteria; D_2__Gammaproteobacteria; D_3__Betaproteobacteriales; D_4__Gallionellaceae											0	0	0	0	0	0	0.0210416	0	0
3284	0	0	0	0	0	0	6	0	0	D_0__Bacteria; D_1__Proteobacteria; D_2__Gammaproteobacteria; D_3__Pseudomonadales; D_4__Moraxellaceae; D_5__Acinetobacter											0	0	0	0	0	0	0.0210416	0	0
3828	0	0	0	0	0	0	6	0	0	D_0__Bacteria; D_1__Proteobacteria; D_2__Deltaproteobacteria; D_3__Myxococcales											0	0	0	0	0	0	0.0210416	0	0
3909	0	0	0	0	0	0	6	0	0	D_0__Bacteria; D_1__Deinococcus-Thermus; D_2__Deinococci; D_3__Deinococcales; D_4__Deinococcaceae; D_5__Deinococcus											0	0	0	0	0	0	0.0210416	0	0
3946	0	0	0	0	0	0	6	0	0	D_0__Bacteria; D_1__Proteobacteria; D_2__Alphaproteobacteria; D_3__Caulobacterales; D_4__Caulobacteraceae; D_5__Brevundimonas											0	0	0	0	0	0	0.0210416	0	0
4797	0	0	0	0	0	0	6	0	0	D_0__Bacteria; D_1__Proteobacteria; D_2__Gammaproteobacteria; D_3__Pseudomonadales; D_4__Moraxellaceae; D_5__Acinetobacter											0	0	0	0	0	0	0.0210416	0	0
5282	0	0	0	0	0	0	6	0	0	D_0__Bacteria; D_1__Proteobacteria; D_2__Gammaproteobacteria											0	0	0	0	0	0	0.0210416	0	0
5292	0	0	0	0	0	0	6	0	0	D_0__Bacteria; D_1__Actinobacteria; D_2__Acidimicrobiia; D_3__Microtrichales; D_4__Ilumatobacteraceae; D_5__uncultured											0	0	0	0	0	0	0.0210416	0	0
5437	0	0	0	0	0	0	6	0	0	D_0__Bacteria; D_1__Proteobacteria; D_2__Gammaproteobacteria; D_3__Betaproteobacteriales; D_4__Gallionellaceae; D_5__Sideroxydans											0	0	0	0	0	0	0.0210416	0	0
5518	0	0	0	0	0	0	6	0	0	D_0__Bacteria; D_1__Proteobacteria; D_2__Alphaproteobacteria; D_3__Rhodobacterales; D_4__Rhodobacteraceae											0	0	0	0	0	0	0.0210416	0	0
5739	0	0	0	0	0	0	6	0	0	D_0__Bacteria; D_1__Actinobacteria; D_2__Actinobacteria; D_3__Micrococcales											0	0	0	0	0	0	0.0210416	0	0
6213	0	0	0	0	0	0	6	0	0	D_0__Bacteria; D_1__Proteobacteria; D_2__Alphaproteobacteria; D_3__Sphingomonadales; D_4__Sphingomonadaceae; D_5__Novosphingobium											0	0	0	0	0	0	0.0210416	0	0
6245	0	0	0	0	0	0	6	0	0	D_0__Bacteria; D_1__Proteobacteria; D_2__Gammaproteobacteria; D_3__Pseudomonadales; D_4__Moraxellaceae; D_5__Acinetobacter											0	0	0	0	0	0	0.0210416	0	0
6272	0	0	0	0	0	0	6	0	0	D_0__Bacteria; D_1__Proteobacteria; D_2__Gammaproteobacteria; D_3__Betaproteobacteriales; D_4__Gallionellaceae											0	0	0	0	0	0	0.0210416	0	0
6786	0	0	0	0	0	0	6	0	0	D_0__Bacteria; D_1__Actinobacteria; D_2__Actinobacteria; D_3__Micrococcales; D_4__Intrasporangiaceae											0	0	0	0	0	0	0.0210416	0	0
7368	0	0	0	0	0	0	6	0	0	D_0__Bacteria; D_1__Actinobacteria; D_2__Actinobacteria; D_3__Propionibacteriales; D_4__Nocardioidaceae; D_5__Nocardioides											0	0	0	0	0	0	0.0210416	0	0
7449	0	0	0	0	0	0	6	0	0	D_0__Bacteria; D_1__Proteobacteria; D_2__Gammaproteobacteria; D_3__Betaproteobacteriales; D_4__Gallionellaceae											0	0	0	0	0	0	0.0210416	0	0
7715	0	0	0	0	0	0	6	0	0	D_0__Bacteria; D_1__Actinobacteria; D_2__Actinobacteria; D_3__Micrococcales; D_4__Intrasporangiaceae											0	0	0	0	0	0	0.0210416	0	0
8104	0	0	0	0	0	0	6	0	0	D_0__Bacteria; D_1__Deinococcus-Thermus; D_2__Deinococci; D_3__Deinococcales; D_4__Deinococcaceae; D_5__Deinococcus; D_6__Deinococcus grandis											0	0	0	0	0	0	0.0210416	0	0
8168	0	0	0	0	0	0	6	0	0	D_0__Bacteria; D_1__Proteobacteria; D_2__Gammaproteobacteria; D_3__Betaproteobacteriales; D_4__Gallionellaceae											0	0	0	0	0	0	0.0210416	0	0
8610	0	0	0	0	0	0	6	0	0	D_0__Bacteria; D_1__Proteobacteria; D_2__Gammaproteobacteria; D_3__Pseudomonadales; D_4__Moraxellaceae; D_5__Acinetobacter											0	0	0	0	0	0	0.0210416	0	0
8626	0	0	0	0	0	0	6	0	0	D_0__Bacteria; D_1__Proteobacteria; D_2__Alphaproteobacteria; D_3__Sphingomonadales; D_4__Sphingomonadaceae											0	0	0	0	0	0	0.0210416	0	0
8737	0	0	0	0	0	0	6	0	0	D_0__Bacteria; D_1__Proteobacteria; D_2__Alphaproteobacteria; D_3__Caulobacterales; D_4__Caulobacteraceae; D_5__Brevundimonas											0	0	0	0	0	0	0.0210416	0	0
8803	0	0	0	0	0	0	6	0	0	D_0__Bacteria; D_1__Actinobacteria; D_2__Actinobacteria; D_3__Micrococcales; D_4__Intrasporangiaceae											0	0	0	0	0	0	0.0210416	0	0
8861	0	0	0	0	0	0	6	0	0	D_0__Bacteria; D_1__Proteobacteria; D_2__Gammaproteobacteria; D_3__Betaproteobacteriales; D_4__Gallionellaceae; D_5__Sideroxydans											0	0	0	0	0	0	0.0210416	0	0
9315	0	0	0	0	0	0	6	0	0	D_0__Bacteria; D_1__Proteobacteria; D_2__Gammaproteobacteria; D_3__Betaproteobacteriales; D_4__Gallionellaceae											0	0	0	0	0	0	0.0210416	0	0
9328	0	0	0	0	0	0	6	0	0	D_0__Bacteria; D_1__Proteobacteria; D_2__Gammaproteobacteria; D_3__Betaproteobacteriales; D_4__Gallionellaceae; D_5__Sideroxydans											0	0	0	0	0	0	0.0210416	0	0
9609	0	0	0	0	0	0	6	0	0	D_0__Bacteria; D_1__Proteobacteria; D_2__Alphaproteobacteria; D_3__Rhizobiales; D_4__Pleomorphomonadaceae; D_5__uncultured; Ambiguous_taxa											0	0	0	0	0	0	0.0210416	0	0
9946	0	0	0	0	0	0	6	0	0	D_0__Bacteria; D_1__Proteobacteria; D_2__Alphaproteobacteria; D_3__Sphingomonadales; D_4__Sphingomonadaceae											0	0	0	0	0	0	0.0210416	0	0
10128	0	0	0	0	0	0	6	0	0	D_0__Bacteria; D_1__Proteobacteria; D_2__Gammaproteobacteria; D_3__Pseudomonadales; D_4__Moraxellaceae; D_5__Alkanindiges; Ambiguous_taxa											0	0	0	0	0	0	0.0210416	0	0
10142	0	0	0	0	0	0	6	0	0	D_0__Bacteria; D_1__Proteobacteria; D_2__Gammaproteobacteria; D_3__Betaproteobacteriales; D_4__Gallionellaceae; D_5__Sideroxydans; Ambiguous_taxa											0	0	0	0	0	0	0.0210416	0	0
10410	0	0	0	0	0	0	6	0	0	D_0__Bacteria; D_1__Actinobacteria; D_2__Actinobacteria; D_3__Propionibacteriales; D_4__Nocardioidaceae; D_5__Nocardioides											0	0	0	0	0	0	0.0210416	0	0
10658	0	0	0	0	0	0	6	0	0	D_0__Bacteria; D_1__Proteobacteria; D_2__Gammaproteobacteria; D_3__Betaproteobacteriales; D_4__Gallionellaceae; D_5__Sideroxydans											0	0	0	0	0	0	0.0210416	0	0
10674	0	0	0	0	0	0	6	0	0	D_0__Archaea; D_1__Euryarchaeota; D_2__Methanomicrobia; D_3__Methanosarcinales; D_4__Methanoperedenaceae											0	0	0	0	0	0	0.0210416	0	0
948	0	0	1	0	0	0	5	0	0	D_0__Bacteria; D_1__Proteobacteria; D_2__Gammaproteobacteria; D_3__Pseudomonadales; D_4__Moraxellaceae; D_5__Alkanindiges; Ambiguous_taxa			FE								0	0	0.00350693	0	0	0	0.0175346	0	0
1847	0	0	1	0	0	0	5	0	0	D_0__Bacteria; D_1__Proteobacteria; D_2__Gammaproteobacteria; D_3__Pseudomonadales; D_4__Moraxellaceae; D_5__Acinetobacter			FE								0	0	0.00350693	0	0	0	0.0175346	0	0
221	0	0	0	0	0	0	5	0	0	D_0__Bacteria; D_1__Proteobacteria; D_2__Gammaproteobacteria; D_3__Betaproteobacteriales											0	0	0	0	0	0	0.0175346	0	0
270	0	0	0	0	0	0	5	0	0	D_0__Bacteria; D_1__Proteobacteria; D_2__Gammaproteobacteria; D_3__Xanthomonadales; D_4__Xanthomonadaceae; D_5__Luteimonas; Ambiguous_taxa											0	0	0	0	0	0	0.0175346	0	0
288	0	0	0	0	0	0	5	0	0	D_0__Bacteria; D_1__Actinobacteria; D_2__Actinobacteria; D_3__Micrococcales; D_4__Intrasporangiaceae; D_5__Ornithinimicrobium											0	0	0	0	0	0	0.0175346	0	0
342	0	0	0	0	0	0	5	0	0	D_0__Bacteria; D_1__Proteobacteria; D_2__Gammaproteobacteria; D_3__Pseudomonadales; D_4__Moraxellaceae; D_5__Acinetobacter											0	0	0	0	0	0	0.0175346	0	0
552	0	0	0	0	0	0	5	0	0	D_0__Bacteria											0	0	0	0	0	0	0.0175346	0	0
594	0	0	0	0	0	0	5	0	0	D_0__Bacteria; D_1__Actinobacteria; D_2__Actinobacteria; D_3__Propionibacteriales; D_4__Nocardioidaceae; D_5__Nocardioides											0	0	0	0	0	0	0.0175346	0	0
612	0	0	0	0	0	0	5	0	0	D_0__Bacteria											0	0	0	0	0	0	0.0175346	0	0
653	0	0	0	0	0	0	5	0	0	D_0__Bacteria; D_1__Omnitrophicaeota											0	0	0	0	0	0	0.0175346	0	0
737	0	0	0	0	0	0	5	0	0	D_0__Bacteria; D_1__Omnitrophicaeota											0	0	0	0	0	0	0.0175346	0	0
744	0	0	0	0	0	0	5	0	0	D_0__Bacteria; D_1__Proteobacteria; D_2__Gammaproteobacteria; D_3__Betaproteobacteriales											0	0	0	0	0	0	0.0175346	0	0
768	0	0	0	0	0	0	5	0	0	D_0__Bacteria; D_1__Proteobacteria; D_2__Gammaproteobacteria; D_3__Pseudomonadales; D_4__Moraxellaceae; D_5__Alkanindiges											0	0	0	0	0	0	0.0175346	0	0
798	0	0	0	0	0	0	5	0	0	D_0__Bacteria; D_1__Proteobacteria; D_2__Gammaproteobacteria; D_3__Salinisphaerales; D_4__Solimonadaceae; D_5__Panacagrimonas; Ambiguous_taxa											0	0	0	0	0	0	0.0175346	0	0
[truncated: 3,818 more rows]

## Sheet: File 03
SI. File 03 Distribution and abundance of core OTUs considering GW, MIX, FE, AS, MN, and NT setups. Abundance of these core OTUs in SUL, BIC, and AS3 setups.
[truncated: 15 more rows]

[truncated: 2 more sheets: File 04, File 05]
